# Supplementary material for: Pd(ii)-catalyzed alkoxylation of unactivated C(sp3)–H and C(sp2)–H bonds using a removable directing group: efficient synthesis of alkyl ethers
Source: Royal Society of Chemistry journal article supplement (doi:10.1039/c3sc51993g), 2013-01-01

## Supporting Information

# **Pd(II)-Catalyzed Alkoxylation of Unactivated C(sp<sup>3</sup>)–H and C(sp<sup>2</sup>)–H Bonds Using a Removable Directing Group: Efficient Synthesis of Alkyl Ethers**

Fa-Jie Chen,<sup>a</sup> Sheng Zhao,<sup>a</sup> Fang Hu,<sup>b</sup> Kai Chen,<sup>a</sup> Qi Zhang,<sup>a</sup> Shuo-Qing Zhang,<sup>a</sup>  
and Bing-Feng Shi<sup>\*,a,b</sup>

<sup>a</sup>Department of Chemistry, Zhejiang University, Hangzhou 310027, China

<sup>b</sup>State Key Laboratory of Bioorganic and Natural Products Chemistry, Shanghai Institute of Organic  
Chemistry, Chinese Academy of Sciences, Shanghai 200032, China

\*To whom correspondence should be addressed. Email: [bfshi@zju.edu.cn](mailto:bfshi@zju.edu.cn)

|                                                                       |         |
|-----------------------------------------------------------------------|---------|
| <b>Table of Contents</b>                                              | S1      |
| <b>General Information</b>                                            | S2      |
| <b>Experimental Procedures</b>                                        | S2-S62  |
| Effect of the Directing Groups                                        | S2-S4   |
| Preparation of 2-(pyridin-2-yl)propan-2-amine (Directing Group)       | S4      |
| DFT Calculations on the Activation Ability of the Designed DGs        | S5-S12  |
| Ineffective Substrate                                                 | S13     |
| General Procedure for the Preparation of Starting Materials           | S13-S30 |
| Optimization of Reaction Conditions                                   | S30-S32 |
| General Procedure for the Alkoxylation of C(sp <sup>3</sup> )–H bonds | S32-S51 |
| General Procedure for the Alkoxylation of C(sp <sup>2</sup> )–H bonds | S51-S60 |
| Removal of Directing Group                                            | S60-61  |
| Mechanistic Investigation                                             | S61-62  |

**General Information:** MeOH were dried by sodium and freshly distilled. *m*-Xylene was used without further purification.  $\text{PhI}(\text{OAc})_2$  was used after recrystallization from Hex and HOAc. The other materials and solvents were purchased from Aladdin and other commercial suppliers and used without additional purification. NMR spectra were recorded on a Bruke Avance operating for  $^1\text{H}$  NMR at 400 MHz, and  $^{13}\text{C}$  NMR at 100 MHz using TMS as internal standard. Chemical shifts were given relative to  $\text{CDCl}_3$  (7.26 ppm for  $^1\text{H}$  NMR, 77.16 ppm for  $^{13}\text{C}$  NMR). The following abbreviations (or combinations thereof) were used to explain multiplicities: s = singlet, d = doublet, t = triplet, m = multiplet, b = broad. Mass spectroscopy data of the products were collected on an HRMS-TOF instrument or a low-resolution MS instrument using EI ionization.

## Experimental Procedures

### Effect of the Directing Groups:

**Table S1. Effect of the Directing Groups**

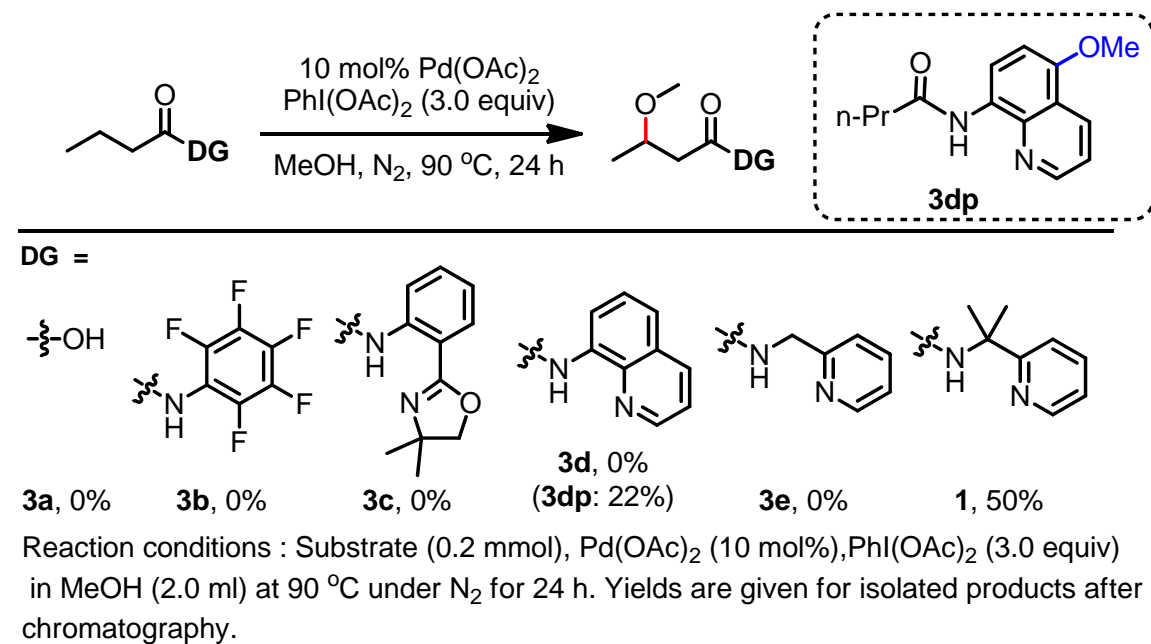

A mixture of substrate (0.2 mmol),  $\text{Pd}(\text{OAc})_2$  (4.5 mg, 10 mmol%) and  $\text{PhI}(\text{OAc})_2$  (194 mg, 0.6 mmol), MeOH (1.0 mL) and *m*-xylene (1.0 mL) in a 50 mL Schlenk

tube (purged with N<sub>2</sub>) was heated at 90 °C for 24 hours. The reaction mixture was cooled to RT, and concentrated *in vacuo*. The resulting residue was purified by flash chromatography.

### 3-Methoxy-*N*-(2-(pyridin-2-yl)propan-2-yl)butanamide **2**

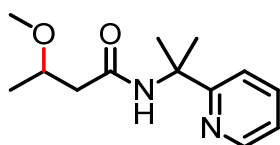

The title compound **2** was prepared according to the general procedure and was purified by flash chromatography (petroleum ether : ethyl acetate = 1 : 2). **2** was obtained as a colorless liquid (23.6 mg, 50%).  $R_f$  = 0.46 (1/2 petroleum ether/ ethyl acetate). <sup>1</sup>H NMR (400 MHz, CDCl<sub>3</sub>)  $\delta$  8.47 (d,  $J$  = 4.4 Hz, 1H), 7.96 (s, 1H), 7.65 (td,  $J$  = 8.0, 1.4 Hz, 1H), 7.36 (d,  $J$  = 8.0 Hz, 1H), 7.13 (dd,  $J$  = 6.9, 5.3 Hz, 1H), 3.80 – 3.68 (m, 1H), 3.35 (s, 3H), 2.44 (dd,  $J$  = 14.6, 7.7 Hz, 1H), 2.28 (dd,  $J$  = 14.6, 4.5 Hz, 1H), 1.71 (s, 3H), 1.70 (s, 3H), 1.18 (d,  $J$  = 6.2 Hz, 3H). <sup>13</sup>C NMR (100 MHz, CDCl<sub>3</sub>)  $\delta$  170.3, 164.7, 147.8, 136.9, 121.8, 119.5, 74.4, 56.6, 56.4, 44.9, 27.7, 27.6, 19.2. HRMS (EI-TOF) calc. for C<sub>13</sub>H<sub>20</sub>N<sub>2</sub>O<sub>2</sub> (M<sup>+</sup>): 236.1525, found: 236.1531.

### *N*-(5-Methoxyquinolin-8-yl)butyramide **3dp**

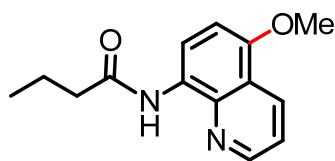

The title compound **3dp** was prepared according to the general procedure and was purified by flash chromatography (petroleum ether : ethyl acetate = 5 : 1). **3dp** was obtained as a colorless oil (11.4 mg, 22%).  $R_f$  = 0.50 (3/ 1 petroleum ether/ ethyl acetate). <sup>1</sup>H NMR (400 MHz, CDCl<sub>3</sub>)  $\delta$  9.56 (s, 1H), 8.81 (dd,  $J$  = 4.2, 1.7 Hz, 1H), 8.71 (d,  $J$  = 8.5 Hz, 1H), 8.57 (dd,  $J$  = 8.4, 1.7 Hz, 1H), 7.44 (dd,  $J$  = 8.4, 4.2 Hz, 1H),

6.84 (d,  $J = 8.6$  Hz, 1H), 3.99 (s, 3H), 2.52 (t,  $J = 7.6$  Hz, 2H), 1.85 (m, 2H), 1.06 (t,  $J = 7.6$  Hz, 3H).  $^{13}\text{C}$  NMR (100 MHz,  $\text{CDCl}_3$ )  $\delta$  171.5, 150.3, 148.7, 139.2, 128.2, 120.8, 120.6, 116.7, 104.6, 55.9, 40.3, 19.4, 14.0. HRMS (EI-TOF) calc. for  $\text{C}_{14}\text{H}_{16}\text{N}_2\text{O}_2$  ( $\text{M}^+$ ): 244.1212, found: 244.1206.

**Preparation of 2-(pyridin-2-yl)propan-2-amine (Directing Group):**<sup>S1</sup>

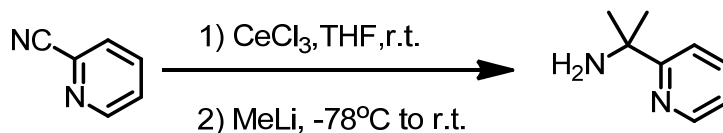

THF (400 mL) was added to anhydrous cerium (III) chloride (73.9 g, 300 mmol) and stirred vigorously under nitrogen. After cooling the mixture to  $-78^\circ\text{C}$ , 1.6 M methyl lithium in diethyl ether (200 mL, 320 mmol) was added dropwise over 2h. Then 2-cyanopyridine (9.6 mL, 100 mmol) was added slowly. After the addition was completed, the mixture was allowed to warm to room temperature and stirred overnight. The reaction was cooled to  $-78^\circ\text{C}$ , quenched with ammonium hydroxide (200 mL) and filtered through a pad of Celite which was washed thoroughly with THF. The solvent was removed under reduce pressure and the residue was suspension in  $\text{CH}_2\text{Cl}_2$ , a filtration give the 2-(pyridin-2-yl)propan-2-amine as yellow solid (11.0 g, 82 %).  $R_f = 0.51$  (10/ 1 dichloromethane/ methanol).  $^1\text{H}$  NMR (400 MHz,  $\text{CDCl}_3$ )  $\delta$  8.54 (d,  $J = 4.2$  Hz, 1H), 7.66 (td,  $J = 7.8, 1.7$  Hz, 1H), 7.45 (d,  $J = 8.0$  Hz, 1H), 7.14 (dd,  $J = 7.3, 4.9$  Hz, 1H), 4.21 (bs, 2H), 1.53 (s, 6H).

<sup>S1</sup> Tucker, R., Craig et al. PCT/US2009/039254. 2009



## DFT Calculations on the Activation Ability of the designed DGs

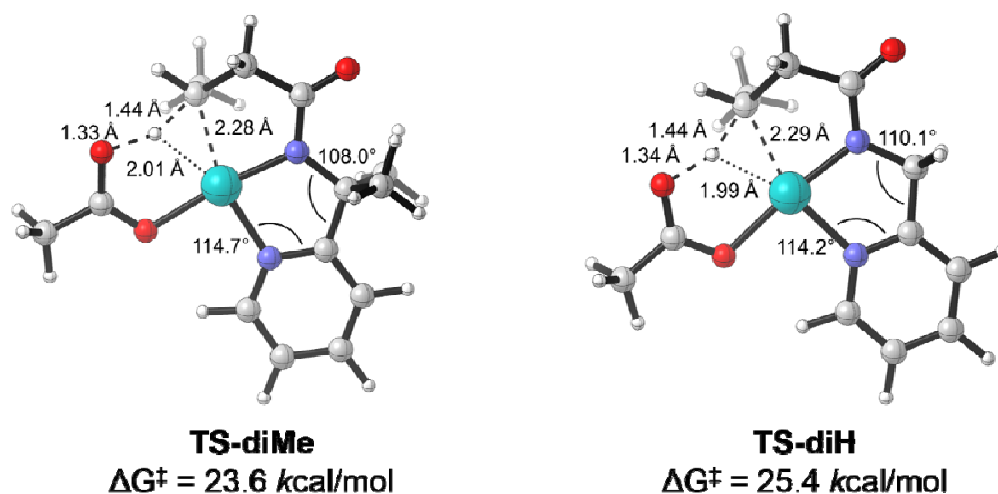

**Figure S1.** Selected geometries of the transition states (TS) for the concerted metallation deprotonation (CMD) C-H activation, **TS-diMe** for **1**, **TS-diH** for **3**.

To shed some light on the design of the directing groups (DGs), we conducted some preliminary density functional theory (DFT) calculations on the activation ability of the designed DGs. All calculations were performed with the Gaussian 09 program.<sup>S2</sup> Geometry optimizations and frequency calculations were performed with B3LYP<sup>S3</sup> functional using LANL2DZ<sup>S4</sup> basis set for Pd combined with 6-31G(d)<sup>S5</sup> basis set for all the other atoms. Single point energy calculations were also performed to

<sup>S2</sup> Gaussian 09, Revision B.01, M. J. Frisch, G. W. Trucks, H. B. Schlegel, G. E. Scuseria, M. A. Robb, J. R. Cheeseman, G. Scalmani, V. Barone, B. Mennucci, G. A. Petersson, H. Nakatsuji, M. Caricato, X. Li, H. P. Hratchian, A. F. Izmaylov, J. Bloino, G. Zheng, J. L. Sonnenberg, M. Hada, M. Ehara, K. Toyota, R. Fukuda, J. Hasegawa, M. Ishida, T. Nakajima, Y. Honda, O. Kitao, H. Nakai, T. Vreven, J. A. Ontomery, Jr., J. E. Peralta, F. Ogliaro, M. Bearpark, J. J. Heyd, E. Brothers, K. N. Kudin, V. N. Staroverov, T. Keith, R. Kobayashi, J. Normand, K. Raghavachari, A. Rendell, J. C. Burant, S. S. Iyengar, J. Tomasi, M. Cossi, N. Rega, J. M. Millam, M. Klene, J. E. Knox, J. B. Cross, V. Bakken, C. Adamo, J. Jaramillo, R. Gomperts, R. E. Stratmann, O. Yazyev, A. J. Austin, R. Cammi, C. Pomelli, J. W. Ochterski, R. L. Martin, K. Morokuma, V. G. Zakrzewski, G. A. Voth, P. Salvador, J. J. Dannenberg, S. Dapprich, A. D. Daniels, O. Farkas, J. B. Foresman, J. V. Ortiz, J. Cioslowski, and D. J. Fox, Gaussian, Inc., Wallingford CT, 2010. Hratchian, A. F. Izmaylov, J. Bloino, G. Zheng, J. L. Sonnenberg, M. Hada, M. Ehara, K. Toyota, R. Fukuda, J. Hasegawa, M. Ishida, T. Nakajima, Y. Honda, O. Kitao, H. Nakai, T. Vreven, J. A. Ontomery, Jr., J. E. Peralta, F. Ogliaro, M. Bearpark, J. J. Heyd, E. Brothers, K. N. Kudin, V. N. Staroverov, T. Keith, R. Kobayashi, J. Normand, K. Raghavachari, A. Rendell, J. C. Burant, S. S. Iyengar, J. Tomasi, M. Cossi, N. Rega, J. M. Millam, M. Klene, J. E. Knox, J. B. Cross, V. Bakken, C. Adamo, J. Jaramillo, R. Gomperts, R. E. Stratmann, O. Yazyev, A. J. Austin, R. Cammi, C. Pomelli, J. W. Ochterski, R. L. Martin, K. Morokuma, V. G. Zakrzewski, G. A. Voth, P. Salvador, J. J. Dannenberg, S. Dapprich, A. D. Daniels, O. Farkas, J. B. Foresman, J. V. Ortiz, J. Cioslowski, and D. J. Fox, Gaussian, Inc., Wallingford CT, 2010.

<sup>S3</sup> A. D. Becke, *J. Chem. Phys.*, **1993**, 98, 5648-5652.

<sup>S4</sup> a) P. J. Hay, W. R. Wadt, *J. Chem. Phys.*, **1985**, 82, 270-283. b) W. R. Wadt, P. J. Hay, *J. Chem. Phys.*, **1985**, 82, 284-298. c) P. J. Hay, W. R. Wadt, *J. Chem. Phys.*, **1985**, 82, 299-310.

<sup>S5</sup> Hehre, W. J.; Ditchfield, R.; Pople, J. A. *J. Chem. Phys.* **1972**, 56, 2257.

further refine the results with M06-2x<sup>S6</sup> functional using Stuttgart/Dresden (SDD)<sup>S7</sup> basis set for Pd combined with 6-311++G(d,p)<sup>S8</sup> basis set for all the remaining atoms. Imaginary frequency in frequency calculations were used to confirm whether the geometries were intermediates or transition states. For transition states, the intrinsic reaction coordination (IRC)<sup>S9</sup> calculations were performed to determine the reactants and products.

As shown in Figure S1, the Gibbs free energy of the CMD process for the dimethyl-DG is lowered by 1.8 kcal/mol compared to the dihydro-DG. The relative Gibbs free energy of intermediates with AcOH as a neutral ligand for diMe-DG and diH-DG is 8.5 kcal/mol and 9.6 kcal/mol respectively. This is consistent with the gem-dimethyl effect (Thorpe–Ingold effect), which facilitates cyclisation by decreasing the bond angle on the carbon in the DG. The subtle difference in geometry might manipulate the coordination between DG and Pd, and therefore shows better reactivity for C-H activation. Moreover, the dihydro-DG might be labile in the strong oxidation condition, namely  $\text{PhI}(\text{OAc})_2$ , during the reaction, which led to the failure of the alkoxylation.

**Table S2. Calculated energy values**

| Species                  | E <sup>a,b</sup> | ZPE <sup>a,c</sup> | H <sub>298</sub> <sup>a,d</sup> | G <sub>298</sub> <sup>a,e</sup> | E <sup>a,f</sup> | G <sub>298</sub> <sup>a,e,f</sup> |
|--------------------------|------------------|--------------------|---------------------------------|---------------------------------|------------------|-----------------------------------|
| <b>Substrate-diMe</b>    | -1007.521408     | -1007.193499       | -1007.170618                    | -1007.247346                    | -1008.46371      | -1008.189648                      |
| <b>TS-diMe</b>           | -1007.477284     | -1007.1543         | -1007.132491                    | -1007.204069                    | -1008.425307     | -1008.152092                      |
| <b>Intermediate-diMe</b> | -1007.502944     | -1007.175659       | -1007.153175                    | -1007.227037                    | -1008.452019     | -1008.176112                      |
| <b>Substrate-diH</b>     | -928.896677      | -928.625381        | -928.605041                     | -928.677753                     | -929.8549767     | -929.6360527                      |
| <b>TS-diH</b>            | -928.848897      | -928.582508        | -928.563275                     | -928.630569                     | -929.8139124     | -929.5955844                      |
| <b>Intermediate-diH</b>  | -928.875559      | -928.604938        | -928.58496                      | -928.654784                     | -929.8415874     | -929.6208124                      |
| <b>AcOH</b>              | -229.07761       | -229.015594        | -229.010062                     | -229.042981                     | -229.0719924     | -229.0373634                      |

<sup>S6</sup> Y. Zhao and D. G. Truhlar, *Theor. Chem. Acc.*, **2008**, 120, 215-241.

<sup>S7</sup> a) Szentpaly, L. V.; Fuentealba, P.; Preuss, H.; Stoll, H. *Chem. Phys. Lett.*, **1982**, 93, 555. b) Dolg, M.; Wedig, U.; Stoll, H.; Preuss, H. *J. Chem. Phys.*, **1987**, 86, 866. c) Schwerdtfeger, P.; Dolg, M.; Schwarz, W. H. E.; Bowmaker, G. A.; Boyd, P. D. W. *J. Chem. Phys.*, **1989**, 91, 1762.

<sup>S8</sup> a) A. D. McLean, G. S. Chandler, *J. Chem. Phys.*, **1980**, 72, 5639-5648. b) K. Raghavachari, J. S. Binkley, R. Seeger, and J. A. Pople, *J. Chem. Phys.*, **1980**, 72, 650-654.

<sup>S9</sup> a) K. Fukui, *Acc. Chem. Res.*, **1981**, 14, 363-368. b) H. P. Hratchian, H. B. Schlegel, *J. Chem. Phys.*, **2004**, 120, 9918-9924. c) H. P. Hratchian, H. B. Schlegel, *J. Chem. Theory and Comput.*, **2005**, 1, 61-69.

<sup>a</sup> With B3LYP functional; 6-31G(d) for C,H,O,N and LANL2DZ for Pd

<sup>b</sup> Electronic energies

<sup>c</sup> Sum of electronic and zero-point energies

<sup>d</sup> Sum of electronic and thermal enthalpies

<sup>e</sup> Sum of electronic and thermal free energies

<sup>f</sup> With M06-2X functional; 6-31G(d) for C,H,O,N and SDD for Pd; solvation with CPCM in methonal

## Cartesian coordinates

### Substrate-diMe

|    |           |           |           |
|----|-----------|-----------|-----------|
| Pd | -0.068621 | 0.863208  | -0.004071 |
| O  | -1.231385 | -3.159722 | 0.005938  |
| N  | -0.122740 | -1.155589 | 0.002002  |
| N  | 1.901773  | 0.499089  | -0.001989 |
| C  | -1.256963 | -1.920057 | 0.002375  |
| C  | 1.195968  | -1.846702 | 0.004461  |
| C  | 1.369875  | -2.713486 | -1.271445 |
| H  | 0.585580  | -3.469678 | -1.289762 |
| H  | 2.346779  | -3.210535 | -1.282546 |
| H  | 1.287341  | -2.088702 | -2.167387 |
| C  | 1.368406  | -2.707400 | 1.284631  |
| H  | 1.284859  | -2.078420 | 2.177538  |
| H  | 2.345299  | -3.204386 | 1.299225  |
| H  | 0.584103  | -3.463514 | 1.305618  |
| C  | 2.286332  | -0.792665 | 0.002271  |
| C  | 3.655684  | -1.093051 | 0.003954  |
| H  | 3.973622  | -2.129188 | 0.007428  |
| C  | 4.592723  | -0.067764 | 0.001041  |
| H  | 5.653743  | -0.300058 | 0.002304  |
| C  | 4.159523  | 1.262305  | -0.003648 |
| H  | 4.859722  | 2.090448  | -0.006211 |
| C  | 2.796961  | 1.508557  | -0.005075 |
| H  | 2.375735  | 2.508258  | -0.008827 |
| O  | -0.178113 | 2.983724  | -0.011673 |
| C  | -1.457167 | 2.930680  | -0.008763 |
| O  | -2.012171 | 1.784855  | -0.009679 |
| C  | -2.280724 | 4.187369  | 0.025690  |
| H  | -3.197345 | 4.051699  | -0.553918 |
| H  | -2.565578 | 4.401534  | 1.062704  |
| H  | -1.704355 | 5.031731  | -0.358887 |
| C  | -2.597202 | -1.185819 | -0.001934 |
| H  | -2.646274 | -0.517917 | 0.866984  |
| H  | -2.642867 | -0.521952 | -0.874117 |

|   |           |           |           |
|---|-----------|-----------|-----------|
| C | -3.793934 | -2.142350 | -0.001955 |
| H | -3.731069 | -2.799855 | 0.872787  |
| H | -3.727849 | -2.803818 | -0.873472 |
| C | -5.132947 | -1.397767 | -0.006146 |
| H | -5.232280 | -0.757465 | -0.891868 |
| H | -5.976111 | -2.098750 | -0.006138 |
| H | -5.235598 | -0.753452 | 0.876285  |

**TS-diMe**

|    |           |           |           |
|----|-----------|-----------|-----------|
| Pd | -0.638254 | 0.016093  | -0.015368 |
| C  | -1.798549 | -1.931395 | 0.208001  |
| H  | -2.458262 | -0.767539 | -0.321333 |
| O  | -3.538999 | -0.037848 | -0.580618 |
| C  | -3.267863 | 1.161267  | -0.263867 |
| O  | -2.110839 | 1.532182  | 0.101176  |
| C  | -0.810903 | -2.893999 | -0.475117 |
| H  | -1.012261 | -2.922137 | -1.555000 |
| C  | 0.669949  | -2.561349 | -0.315411 |
| C  | 2.261564  | -0.672446 | -0.095289 |
| C  | 3.052892  | -1.019303 | -1.383116 |
| H  | 3.101035  | -2.104934 | -1.479196 |
| H  | 4.072177  | -0.618246 | -1.344599 |
| H  | 2.548018  | -0.605283 | -2.262449 |
| C  | 3.000724  | -1.212876 | 1.155554  |
| H  | 2.458453  | -0.939256 | 2.067046  |
| H  | 4.019273  | -0.813667 | 1.222953  |
| H  | 3.049119  | -2.300686 | 1.083803  |
| C  | 2.146109  | 0.843821  | 0.012275  |
| C  | 3.265608  | 1.683207  | 0.082931  |
| H  | 4.259415  | 1.250701  | 0.061550  |
| C  | 3.097989  | 3.059639  | 0.179407  |
| H  | 3.965189  | 3.711614  | 0.234249  |
| C  | 1.806774  | 3.593234  | 0.204914  |
| H  | 1.633475  | 4.661426  | 0.279952  |
| C  | 0.732607  | 2.719250  | 0.133327  |
| H  | -0.300074 | 3.049658  | 0.150475  |
| N  | 0.895777  | -1.229511 | -0.166575 |
| O  | 1.546131  | -3.431993 | -0.369163 |
| N  | 0.907946  | 1.387013  | 0.039888  |
| H  | -0.964401 | -3.916583 | -0.106371 |
| H  | -2.785737 | -2.253928 | -0.158668 |
| C  | -1.848417 | -2.069414 | 1.737012  |
| H  | -2.563356 | -1.364257 | 2.176543  |
| H  | -2.167186 | -3.084135 | 2.018220  |

|   |           |           |           |
|---|-----------|-----------|-----------|
| H | -0.873194 | -1.890591 | 2.200240  |
| C | -4.378907 | 2.183867  | -0.323000 |
| H | -4.782502 | 2.221909  | -1.339960 |
| H | -5.193598 | 1.872271  | 0.338563  |
| H | -4.019795 | 3.171143  | -0.029137 |

**Intermediate-diMe**

|    |           |           |           |
|----|-----------|-----------|-----------|
| Pd | 0.672540  | -0.115383 | -0.192055 |
| C  | 1.637515  | -1.931630 | -0.306991 |
| H  | 2.162932  | 0.144498  | 1.536461  |
| O  | 3.024465  | 0.642570  | 1.624055  |
| C  | 3.257246  | 1.207126  | 0.447440  |
| O  | 2.483590  | 1.100429  | -0.508975 |
| C  | 0.715007  | -2.961450 | 0.364171  |
| H  | 0.984301  | -3.084152 | 1.422740  |
| C  | -0.765182 | -2.561405 | 0.346216  |
| C  | -2.257904 | -0.581588 | 0.211164  |
| C  | -2.926592 | -0.831243 | 1.588581  |
| H  | -3.015383 | -1.908002 | 1.741279  |
| H  | -3.924058 | -0.380128 | 1.640676  |
| H  | -2.310852 | -0.407201 | 2.389408  |
| C  | -3.148183 | -1.137331 | -0.931177 |
| H  | -2.688200 | -0.930752 | -1.903691 |
| H  | -4.149607 | -0.691762 | -0.918382 |
| H  | -3.237800 | -2.217434 | -0.803475 |
| C  | -2.100746 | 0.932006  | 0.016043  |
| C  | -3.218485 | 1.781516  | 0.012085  |
| H  | -4.209402 | 1.365410  | 0.153378  |
| C  | -3.055039 | 3.148702  | -0.174050 |
| H  | -3.919694 | 3.806648  | -0.177692 |
| C  | -1.769184 | 3.663201  | -0.358186 |
| H  | -1.595183 | 4.723283  | -0.511255 |
| C  | -0.705884 | 2.772288  | -0.343454 |
| H  | 0.318384  | 3.104488  | -0.487357 |
| N  | -0.929538 | -1.217566 | 0.173064  |
| O  | -1.674240 | -3.379890 | 0.519767  |
| N  | -0.865554 | 1.449705  | -0.158751 |
| H  | 0.805820  | -3.957753 | -0.090063 |
| H  | 2.595900  | -1.863748 | 0.224795  |
| C  | 1.899816  | -2.225522 | -1.784542 |
| H  | 2.509902  | -1.445412 | -2.255476 |
| H  | 2.437897  | -3.181077 | -1.899109 |
| H  | 0.965497  | -2.308950 | -2.351642 |
| C  | 4.543020  | 1.979617  | 0.381713  |

|   |          |          |           |
|---|----------|----------|-----------|
| H | 4.579354 | 2.715037 | 1.191487  |
| H | 5.385456 | 1.294244 | 0.524704  |
| H | 4.630601 | 2.474846 | -0.585332 |

**Substrate-diH**

|    |           |           |           |
|----|-----------|-----------|-----------|
| Pd | 0.180530  | 0.652480  | 0.001647  |
| O  | -1.517776 | -3.178303 | 0.065223  |
| N  | -0.254042 | -1.307882 | 0.019812  |
| N  | 2.065077  | -0.087339 | -0.013005 |
| C  | -1.462502 | -1.942509 | 0.028612  |
| C  | 0.895647  | -2.205567 | 0.060216  |
| C  | 2.177106  | -1.432179 | 0.016824  |
| C  | 3.444109  | -2.025437 | 0.009891  |
| H  | 3.522401  | -3.107758 | 0.033536  |
| C  | 4.578503  | -1.222998 | -0.027342 |
| H  | 5.566778  | -1.673393 | -0.033392 |
| C  | 4.435071  | 0.168497  | -0.057414 |
| H  | 5.295764  | 0.827680  | -0.086731 |
| C  | 3.156183  | 0.703262  | -0.049216 |
| H  | 2.964310  | 1.770898  | -0.070574 |
| O  | 0.389344  | 2.773195  | -0.017262 |
| C  | -0.882799 | 2.893745  | 0.007215  |
| O  | -1.589062 | 1.830966  | 0.020168  |
| C  | -1.532133 | 4.247938  | 0.051473  |
| H  | -2.474559 | 4.231947  | -0.501729 |
| H  | -1.755931 | 4.504876  | 1.093733  |
| H  | -0.859134 | 5.005203  | -0.356799 |
| C  | -2.719332 | -1.080706 | -0.009755 |
| H  | -2.721330 | -0.415874 | 0.863829  |
| H  | -2.668868 | -0.410305 | -0.877094 |
| C  | -4.005628 | -1.911349 | -0.049791 |
| H  | -4.028815 | -2.581375 | 0.817352  |
| H  | -3.984804 | -2.566624 | -0.928638 |
| C  | -5.263057 | -1.036592 | -0.075091 |
| H  | -5.274937 | -0.378451 | -0.953258 |
| H  | -6.172295 | -1.648544 | -0.105720 |
| H  | -5.322299 | -0.396455 | 0.814377  |
| H  | 0.866818  | -2.919942 | -0.776766 |
| H  | 0.878206  | -2.832910 | 0.965703  |

**TS-diH**

|    |          |           |           |
|----|----------|-----------|-----------|
| Pd | 0.370656 | -0.062594 | 0.003448  |
| C  | 2.157682 | 1.359434  | 0.191442  |
| H  | 2.338182 | 0.017997  | -0.303290 |

|   |           |           |           |
|---|-----------|-----------|-----------|
| O | 3.085745  | -1.064482 | -0.547301 |
| C | 2.392745  | -2.085508 | -0.249588 |
| O | 1.175069  | -2.015619 | 0.100612  |
| C | 1.589002  | 2.608225  | -0.513583 |
| H | 1.801891  | 2.554289  | -1.590018 |
| C | 0.084117  | 2.819593  | -0.371480 |
| C | -2.022292 | 1.651449  | -0.066667 |
| C | -2.527609 | 0.233254  | 0.002350  |
| C | -3.888166 | -0.088619 | 0.032546  |
| H | -4.623998 | 0.708991  | 0.002030  |
| C | -4.277847 | -1.422171 | 0.099272  |
| H | -5.332067 | -1.683067 | 0.121150  |
| C | -3.300004 | -2.420310 | 0.136972  |
| H | -3.564128 | -3.471114 | 0.189728  |
| C | -1.964940 | -2.042195 | 0.106064  |
| H | -1.148145 | -2.755383 | 0.133372  |
| N | -0.573308 | 1.661543  | -0.121326 |
| O | -0.479929 | 3.906684  | -0.507882 |
| N | -1.597350 | -0.749242 | 0.040264  |
| H | 2.097280  | 3.509092  | -0.145241 |
| H | 3.190989  | 1.286190  | -0.181831 |
| C | 2.262721  | 1.499062  | 1.717140  |
| H | 2.666036  | 0.587440  | 2.172810  |
| H | 2.937980  | 2.327470  | 1.978072  |
| H | 1.292987  | 1.705867  | 2.179846  |
| C | 3.057051  | -3.441608 | -0.313233 |
| H | 3.449753  | -3.606295 | -1.321835 |
| H | 3.909178  | -3.460179 | 0.374182  |
| H | 2.354815  | -4.235048 | -0.053283 |
| H | -2.451208 | 2.159721  | -0.944123 |
| H | -2.396955 | 2.210930  | 0.806425  |

**Intermediate-diH**

|    |           |           |           |
|----|-----------|-----------|-----------|
| Pd | 0.450052  | 0.045208  | 0.189466  |
| C  | 1.981539  | 1.433962  | 0.273339  |
| H  | 1.763032  | -0.752241 | -1.517763 |
| O  | 2.397264  | -1.520905 | -1.588665 |
| C  | 2.410023  | -2.111709 | -0.401586 |
| O  | 1.717802  | -1.724452 | 0.544233  |
| C  | 1.485791  | 2.710670  | -0.432122 |
| H  | 1.805172  | 2.716241  | -1.483489 |
| C  | -0.042662 | 2.835333  | -0.444888 |
| C  | -2.077852 | 1.522159  | -0.262360 |
| C  | -2.531089 | 0.088900  | -0.083850 |

|   |           |           |           |
|---|-----------|-----------|-----------|
| C | -3.890697 | -0.246930 | -0.132186 |
| H | -4.625573 | 0.533281  | -0.307868 |
| C | -4.281110 | -1.568883 | 0.045936  |
| H | -5.332457 | -1.840483 | 0.010072  |
| C | -3.302813 | -2.541199 | 0.272997  |
| H | -3.562208 | -3.584470 | 0.420818  |
| C | -1.974464 | -2.138508 | 0.308238  |
| H | -1.170157 | -2.847113 | 0.485069  |
| N | -0.637320 | 1.636121  | -0.206388 |
| O | -0.659934 | 3.873544  | -0.684702 |
| N | -1.594536 | -0.860710 | 0.132767  |
| H | 1.907354  | 3.618985  | 0.019730  |
| H | 2.853758  | 1.017436  | -0.247084 |
| C | 2.325364  | 1.653022  | 1.746610  |
| H | 2.626526  | 0.721891  | 2.241146  |
| H | 3.160831  | 2.365683  | 1.845855  |
| H | 1.475940  | 2.068457  | 2.300847  |
| C | 3.342065  | -3.285468 | -0.311183 |
| H | 3.115972  | -4.004262 | -1.105053 |
| H | 4.371801  | -2.944350 | -0.463052 |
| H | 3.250121  | -3.758664 | 0.666427  |
| H | -2.465357 | 1.907450  | -1.219221 |
| H | -2.559763 | 2.141126  | 0.512879  |

**AcOH**

|   |           |           |           |
|---|-----------|-----------|-----------|
| C | -0.092494 | 0.125638  | 0.000029  |
| O | -0.645677 | 1.202013  | -0.000040 |
| O | -0.778686 | -1.046655 | -0.000028 |
| H | -1.723731 | -0.802927 | -0.000080 |
| C | 1.397548  | -0.109836 | 0.000048  |
| H | 1.685450  | -0.691502 | 0.882016  |
| H | 1.685465  | -0.691591 | -0.881856 |
| H | 1.917402  | 0.848347  | 0.000006  |



## Ineffective Substrate

### Scheme S1. Ineffective Substrate

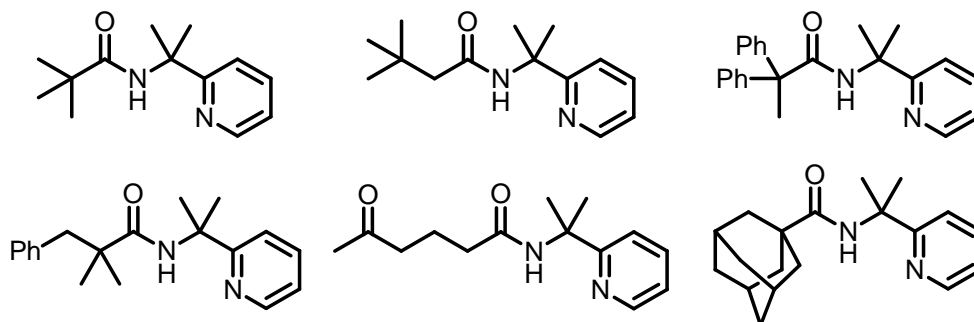

### General Procedure for the Preparation of Starting Materials (Method A):

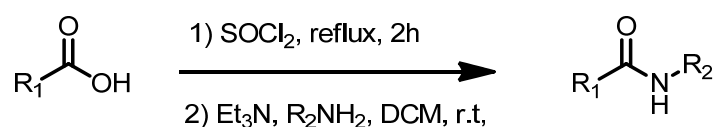

A solution of an acid (5 mmol) was refluxed in 5 mL  $\text{SOCl}_2$  for 2h and cooled to RT. The excess of  $\text{SOCl}_2$  was removed under vacuum to give corresponding acid chloride. The acid chloride was then re-dissolved in 5 mL dry  $\text{CH}_2\text{Cl}_2$  and added dropwise to a 20 mL dry  $\text{CH}_2\text{Cl}_2$  solution containing amine (5 mmol) and  $\text{Et}_3\text{N}$  (10 mmol) at 0 °C. After stirring for 6h at ambient temperature, the resulting mixture was washed with brine, dried over  $\text{MgSO}_4$ , filtered and concentrated under reduced pressure. The residue was purified by flash chromatography to give the desired product.

### General Procedure for the Preparation of Starting Materials (Method B):

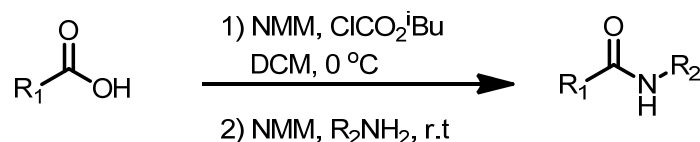

To an round bottom flask was added the acid (5 mmol) and dry  $\text{CH}_2\text{Cl}_2$  (20 mL). Then the flask was submerged in a brine ice bath, N-methylmorpholine (6 mmol) was

added via syringe and the solution stirred for 15 min. After that, isobutylchloroformate (5.5 mmol) was added dropwise over 20 minutes. After stirring for 6h at ambient temperature, the resulting mixture was washed with sat. Na<sub>2</sub>CO<sub>3</sub>, and brine, dried over MgSO<sub>4</sub>, filtered and concentrated under reduced pressure. The residue was purified by flash chromatography to give the desired product.

**General Procedure for the Preparation of Starting Materials (Method C):**

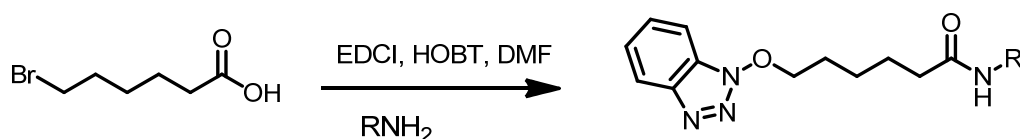

A mixture of amine (5 mmol), 6-bromohexanoic acid (5 mmol), EDCI (5.5 mmol) and HOBT (5.5 mmol) in anhydrous DMF (20 mL) was stirred at room temperature overnight. Water was added and the mixture was extracted with diethyl ether. The combined organic layer was washed with brine, dried over MgSO<sub>4</sub>, filtered and concentrated under reduced pressure. The residue was purified by flash chromatography to give the desired product.

***N*-(2-(Pyridin-2-yl)propan-2-yl)butyramide **1****

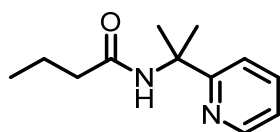

The title compound **1** was prepared according to the general procedure (Method B). *R<sub>f</sub>* = 0.50 (1/2 petroleum ether/ ethyl acetate). <sup>1</sup>H NMR (400 MHz, CDCl<sub>3</sub>) δ 8.50 (d, *J* = 4.4 Hz, 1H), 7.72 – 7.69 (m, 2H), 7.40 (d, *J* = 8.0 Hz, 1H), 7.19 – 7.16 (m, 1H), 2.23 (t, *J* = 7.2 Hz, 2H), 1.75 (s, 6H), 1.72 - 1.66 (m, 2H), 0.96 (t, *J* = 7.2 Hz, 3H). <sup>13</sup>C NMR (100 MHz, CDCl<sub>3</sub>) δ 172.4, 164.8, 147.7, 137.2, 121.9, 119.6, 56.5, 39.9, 27.7, 19.3, 13.9. HRMS (EI-TOF) calc. for C<sub>12</sub>H<sub>18</sub>N<sub>2</sub>O (M<sup>+</sup>): 206.1419, found: 206.1418.

***N*-(2-(Pyridin-2-yl)propan-2-yl)hexanamide 4s**

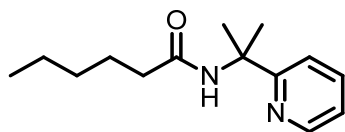

The title compound **4s** was prepared according to the general procedure (Method B).  $R_f = 0.49$  (1/ 1 petroleum ether/ ethyl acetate).  $^1\text{H}$  NMR (400 MHz,  $\text{CDCl}_3$ )  $\delta$  8.50 (d,  $J = 4.8$  Hz, 1H), 7.72 – 7.68 (m, 2H), 7.39 (d,  $J = 8.0$  Hz, 1H), 7.17 (dd,  $J = 7.2, 5.2$  Hz, 1H), 2.23 (t,  $J = 7.2$  Hz, 2H), 1.73 (s, 6H), 1.68 - 1.61 (m, 2H), 1.33 – 1.30 (m, 4H), 0.88 (t,  $J = 6.8$  Hz, 3H).  $^{13}\text{C}$  NMR (100 MHz,  $\text{CDCl}_3$ )  $\delta$  172.6, 164.8, 147.7, 137.2, 121.9, 119.6, 56.4, 37.8, 31.5, 27.6, 25.5, 22.5, 14.1. HRMS (EI-TOF) calc. for  $\text{C}_{14}\text{H}_{22}\text{N}_2\text{O}$  ( $\text{M}^+$ ): 234.1732, found: 234.1729.

**5-Methyl-*N*-(2-(pyridin-2-yl)propan-2-yl)hexanamide 5s**

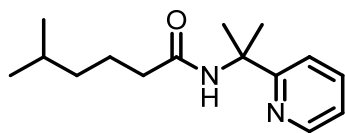

The title compound **5s** was prepared according to the general procedure (Method B).  $R_f = 0.55$  (1/ 2 petroleum ether/ ethyl acetate).  $^1\text{H}$  NMR (400 MHz,  $\text{CDCl}_3$ )  $\delta$  8.51 (d,  $J = 4.4$  Hz, 1H), 7.73 – 7.69 (m, 2H), 7.40 (d,  $J = 8.0$  Hz, 1H), 7.17 (dd,  $J = 7.6, 4.8$  Hz, 1H), 2.23 (t,  $J = 7.6$  Hz, 2H), 1.75 (s, 6H), 1.66 – 1.55 (m, 3H), 1.25 – 1.20 (m, 2H), 0.88 (d,  $J = 6.4$  Hz, 6H).  $^{13}\text{C}$  NMR (100 MHz,  $\text{CDCl}_3$ )  $\delta$  172.5, 164.8, 147.7, 137.2, 121.9, 119.6, 56.4, 38.6, 38.1, 28.0, 27.6, 23.7, 22.7. HRMS (EI-TOF) calc. for  $\text{C}_{15}\text{H}_{24}\text{N}_2\text{O}$  ( $\text{M}^+$ ): 248.1889, found: 248.1886.

**3-Phenyl-*N*-(2-(pyridin-2-yl)propan-2-yl)propanamide 6s**

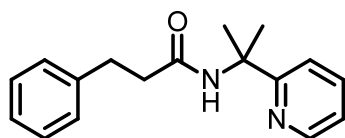

The title compound **6s** was prepared according to the general procedure (Method B).  $R_f = 0.49$  (1/ 2 petroleum ether/ ethyl acetate).  $^1\text{H}$  NMR (400 MHz,  $\text{CDCl}_3$ )  $\delta$  8.47 (d,  $J = 4.8$  Hz, 1H), 7.71 – 7.67 (m, 1H), 7.63 (s, 1H), 7.34 (d,  $J = 8.0$  Hz, 1H), 7.29 – 7.22 (m, 4H), 7.20 – 7.16 (m, 2H), 2.99 (t,  $J = 7.6$  Hz, 2H), 2.56 (t,  $J = 8.4$ , 2H), 1.72 (s, 6H).  $^{13}\text{C}$  NMR (100 MHz,  $\text{CDCl}_3$ )  $\delta$  171.4, 164.6, 147.7, 141.3, 137.2, 128.6, 128.5, 126.2, 121.9, 119.6, 56.6, 39.5, 31.8, 27.6. HRMS (EI-TOF) calc. for  $\text{C}_{17}\text{H}_{20}\text{N}_2\text{O}$  ( $\text{M}^+$ ): 268.1576, found: 268.1578.

#### 4-Phenyl-*N*-(2-(pyridin-2-yl)propan-2-yl)butanamide **7s**

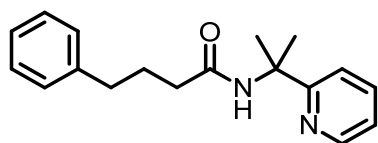

The title compound **7s** was prepared according to the general procedure (Method B).  $R_f = 0.65$  (1/2 petroleum ether/ ethyl acetate).  $^1\text{H}$  NMR (400 MHz,  $\text{CDCl}_3$ )  $\delta$  8.50 (d,  $J = 4.4$  Hz, 1H), 7.73 – 7.69 (m, 2H), 7.40 (d,  $J = 8.0$  Hz, 1H), 7.29 – 7.26 (m, 2H), 7.21 – 7.17 (m, 4H), 2.67 (t,  $J = 7.6$  Hz, 2H), 2.27 (t,  $J = 6.4$  Hz, 2H), 2.03 – 1.96 (m, 2H), 1.75 (s, 6H).  $^{13}\text{C}$  NMR (100 MHz,  $\text{CDCl}_3$ )  $\delta$  172.1, 164.7, 147.7, 141.9, 137.2, 128.7, 128.4, 125.9, 122.0, 119.6, 56.5, 37.0, 35.3, 27.7, 27.4. HRMS (EI-TOF) calc. for  $\text{C}_{18}\text{H}_{22}\text{N}_2\text{O}$  ( $\text{M}^+$ ): 282.1732, found: 282.1732.

#### 4-(4-Chlorophenyl)-*N*-(2-(pyridin-2-yl)propan-2-yl)butanamide **8s**

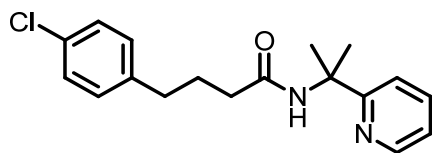

The title compound **8s** was prepared according to the general procedure (Method B).  $R_f = 0.44$  (1/ 1 petroleum ether/ ethyl acetate).  $^1\text{H}$  NMR (400 MHz,  $\text{CDCl}_3$ )  $\delta$  8.50 (d,  $J = 4.4$  Hz, 1H), 7.72 (t,  $J = 6.0$  Hz, 2H), 7.40 (d,  $J = 8.4$  Hz, 1H), 7.25 – 7.18 (m, 3H), 7.13 (d,  $J = 8.0$  Hz, 2H), 2.64 (t,  $J = 7.2$  Hz, 2H), 2.26 (t,  $J = 7.6$  Hz, 2H), 2.01 – 1.95 (m, 2H), 1.75 (s, 6H).  $^{13}\text{C}$  NMR (100 MHz,  $\text{CDCl}_3$ )  $\delta$  171.8, 164.6, 127.7, 140.4, 137.3, 130.0, 128.5, 122.0, 119.6, 56.5, 36.8, 34.6, 27.6, 27.2. HRMS (EI-TOF) calc. for  $\text{C}_{18}\text{H}_{21}\text{ClN}_2\text{O}$  ( $\text{M}^+$ ): 316.1342, found: 316.1344.

**4-(4-Fluorophenyl)-N-(2-(pyridin-2-yl)propan-2-yl)butanamide 9s**

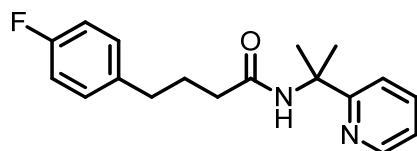

The title compound **9s** was prepared according to the general procedure (Method B).  $R_f = 0.51$  (1/ 1 petroleum ether/ ethyl acetate).  $^1\text{H}$  NMR (400 MHz,  $\text{CDCl}_3$ )  $\delta$  8.49 (d,  $J = 4.4$  Hz, 1H), 7.72 – 7.69 (m, 2H), 7.39 (d,  $J = 8.0$  Hz, 1H), 7.20 – 7.13 (m, 3H), 6.95 (t,  $J = 8.8$  Hz, 2H), 2.64 (t,  $J = 7.6$  Hz, 2H), 2.25 (t,  $J = 7.6$  Hz, 2H), 2.00 – 1.93 (m, 2H), 1.75 (s, 6H).  $^{13}\text{C}$  NMR (100 MHz,  $\text{CDCl}_3$ )  $\delta$  171.9, 164.7, 161.4 (d,  $J_{\text{C-F}} = 242.0$  Hz), 147.7, 137.5 (d,  $J_{\text{C-F}} = 3.0$  Hz), 137.2, 130.0 (d,  $J_{\text{C-F}} = 8.0$  Hz), 122.0, 119.6, 115.1 (d,  $J_{\text{C-F}} = 21.0$  Hz), 56.5, 36.9, 34.5, 27.6, 27.5. HRMS (EI-TOF) calc. for  $\text{C}_{18}\text{H}_{21}\text{FN}_2\text{O}$  ( $\text{M}^+$ ): 300.1638, found: 300.1638.

**6-Chloro-N-(2-(pyridin-2-yl)propan-2-yl)hexanamide 10s**

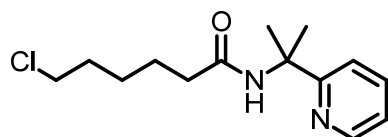

The title compound **10s** was prepared according to the general procedure (Method B).  $R_f = 0.54$  (1/ 1 petroleum ether/ ethyl acetate).  $^1\text{H}$  NMR (400 MHz,  $\text{CDCl}_3$ )  $\delta$  8.48 (d,

$J = 4.4$  Hz, 1H), 7.71 – 7.66 (m, 2H), 7.37 (d,  $J = 8.0$  Hz, 1H), 7.16 (dd,  $J = 5.2, 7.2$  Hz, 1H), 3.51 (t,  $J = 6.8$  Hz, 2H), 2.25 (t,  $J = 7.2$  Hz, 2H), 1.82 – 1.64 (m, 10H), 1.51 – 1.43 (m, 2H).  $^{13}\text{C}$  NMR (100 MHz,  $\text{CDCl}_3$ )  $\delta$  171.9, 164.7, 147.7, 137.2, 121.9, 119.6, 77.5, 77.2, 76.8, 56.5, 45.0, 37.5, 32.5, 27.6, 26.5, 25.0. HRMS (EI-TOF) calc. for  $\text{C}_{14}\text{H}_{21}\text{ClN}_2\text{O}$  ( $\text{M}^+$ ): 268.1342, found: 268.1348.

### 6-Cyano-*N*-(2-(pyridin-2-yl)propan-2-yl)hexanamide **11s**

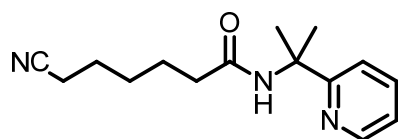

The title compound **11s** was prepared according to the general procedure (Method B).  $R_f = 0.65$  (ethyl acetate).  $^1\text{H}$  NMR (400 MHz,  $\text{CDCl}_3$ )  $\delta$  8.44 (d,  $J = 4.4$  Hz, 1H), 7.74 – 7.69 (m, 2H), 7.39 (d,  $J = 8.0$  Hz, 1H), 7.18 (dd,  $J = 7.2, 5.6$  Hz, 1H), 2.33 (t,  $J = 7.2$  Hz, 2H), 2.26 (t,  $J = 7.2$  Hz, 2H), 1.73 (s, 6H), 1.69 – 1.64 (m, 4H).  $^{13}\text{C}$  NMR (100 MHz,  $\text{CDCl}_3$ )  $\delta$  171.8, 164.5, 147.6, 137.3, 122.0, 119.8, 119.6, 77.5, 77.2, 76.8, 56.5, 37.2, 28.3, 27.6, 25.3, 24.8, 17.1. HRMS (EI-TOF) calc. for  $\text{C}_{15}\text{H}_{21}\text{N}_3\text{O}$  ( $\text{M}^+$ ): 259.1685, found: 259.1682.

### 6-((*tert*-Butyldimethylsilyl)oxy)-*N*-(2-(pyridin-2-yl)propan-2-yl)hexanamide **12s**

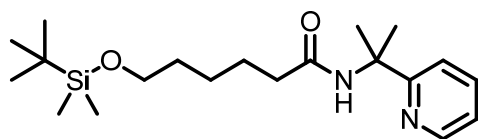

The title compound **12s** was prepared according to the general procedure (Method B).  $R_f = 0.58$  (1/ 1 petroleum ether/ ethyl acetate).  $^1\text{H}$  NMR (400 MHz,  $\text{CDCl}_3$ )  $\delta$  8.51 (d,  $J = 4.8$  Hz, 1H), 7.73 – 7.69 (m, 2H), 7.40 (d,  $J = 8.0$  Hz, 1H), 7.20 – 7.17 (m, 1H), 3.60 (t,  $J = 6.8$  Hz, 2H), 2.26 (t,  $J = 7.6$ , 2H), 1.75 (s, 6H), 1.70 – 1.66 (m, 2H), 1.57 – 1.53 (m, 2H), 1.40 – 1.36 (m, 2H), 0.88 (s, 9H), 0.03 (s, 6H).  $^{13}\text{C}$  NMR (100 MHz,

$\text{CDCl}_3$ )  $\delta$  172.4, 164.8, 147.7, 137.2, 122.0, 119.6, 77.5, 77.2, 76.8, 63.3, 56.5, 38.0, 32.8, 27.7, 26.1, 25.8, 26.0, 18.5, 0.1, -5.1. HRMS (EI-TOF) calc. for  $\text{C}_{20}\text{H}_{36}\text{N}_2\text{O}_2\text{Si}$  ( $\text{M}^+$ ): 364.2546, found: 364.2547.

**6-Oxo-6-((2-(pyridin-2-yl)propan-2-yl)amino)hexyl acetate 13s**

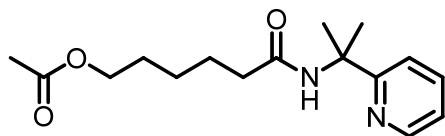

The title compound **13s** was prepared according to the general procedure (Method B).  $R_f$  = 0.65 (ethyl acetate).  $^1\text{H}$  NMR (400 MHz,  $\text{CDCl}_3$ )  $\delta$  8.50 (d,  $J$  = 4.8 Hz, 1H), 7.73 – 7.69 (m, 2H), 7.39 (d,  $J$  = 8.0 Hz, 1H), 7.20 – 7.17 (m, 1H), 4.05 (t,  $J$  = 6.4 Hz, 2H), 2.26 (t,  $J$  = 7.2 Hz, 2H), 2.02 (s, 3H), 1.74 (s, 6H), 1.71 – 1.62 (m, 4H), 1.44 – 1.37 (m, 2H).  $^{13}\text{C}$  NMR (100 MHz,  $\text{CDCl}_3$ )  $\delta$  172.1, 171.2, 164.5, 147.3, 137.6, 122.0, 119.8, 77.5, 77.2, 76.8, 64.4, 56.3, 37.5, 28.5, 27.6, 25.6, 25.3, 21.0. HRMS (EI-TOF) calc. for  $\text{C}_{16}\text{H}_{24}\text{N}_2\text{O}_3$  ( $\text{M}^+$ ): 292.1787, found: 292.1790.

**6-Methoxy-N-(2-(pyridin-2-yl)propan-2-yl)hexanamide 14s**

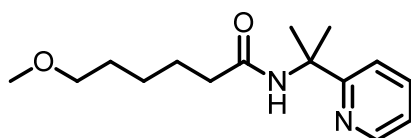

The title compound **14s** was prepared according to the general procedure (Method B).  $R_f$  = 0.45 (ethyl acetate).  $^1\text{H}$  NMR (400 MHz,  $\text{CDCl}_3$ )  $\delta$  8.51 (d,  $J$  = 4.4 Hz, 1H), 7.74 (t,  $J$  = 7.6 Hz, 1H), 7.68 (s, 1H), 7.42 (d,  $J$  = 8.0 Hz, 1H), 7.29 – 7.20 (m, 1H), 3.37 (t,  $J$  = 6.4 Hz, 2H), 3.31 (s, 3H), 2.26 (t,  $J$  = 7.2 Hz, 2H), 1.75 (s, 6H), 1.72 – 1.56 (m, 4H), 1.43 – 1.37 (m, 2H).  $^{13}\text{C}$  NMR (100 MHz,  $\text{CDCl}_3$ )  $\delta$  172.5, 164.6, 147.3, 137.7, 122.1, 119.9, 77.5, 77.2, 76.8, 72.8, 58.7, 56.4, 37.7, 29.5, 27.7, 25.9, 25.7. HRMS (EI-TOF) calc. for  $\text{C}_{15}\text{H}_{24}\text{N}_2\text{O}_2$  ( $\text{M}^+$ ): 264.1838, found: 264.1837.

#### 4-Methoxy-*N*-(2-(pyridin-2-yl)propan-2-yl)butanamide **15s**

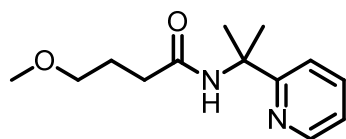

The title compound **15s** was prepared according to the general procedure (Method A).  $R_f = 0.50$  (ethyl acetate).  $^1\text{H}$  NMR (400 MHz,  $\text{CDCl}_3$ )  $\delta$  8.50 (d,  $J = 5.2$  Hz, 1H), 7.72–7.68 (m, 2H), 7.39 (d,  $J = 8.0$  Hz, 1H), 7.19–7.16 (m, 1H), 3.43 (t,  $J = 6.0$  Hz, 2H), 3.33 (s, 3H), 2.34 (t,  $J = 7.2$  Hz, 2H), 1.96–1.89 (m, 2H), 1.74 (s, 6H).  $^{13}\text{C}$  NMR (100 MHz,  $\text{CDCl}_3$ )  $\delta$  171.9, 164.7, 147.7, 137.1, 121.9, 119.6, 77.5, 77.2, 76.8, 72.0, 58.7, 56.5, 34.3, 27.7, 25.7. HRMS (EI-TOF) calc. for  $\text{C}_{13}\text{H}_{20}\text{N}_2\text{O}_2$  ( $\text{M}^+$ ): 236.1525, found: 236.1526.

#### 6-((1H-Benzo[d][1,2,3]triazol-1-yl)oxy)-*N*-(2-(pyridin-2-yl)propan-2-yl)hexanamide **16s**

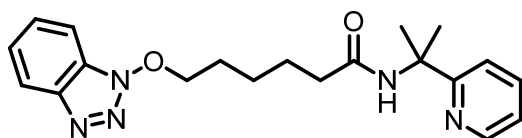

The title compound **16s** was prepared according to the general procedure (Method C).  $R_f = 0.44$  (ethyl acetate).  $^1\text{H}$  NMR (400 MHz,  $\text{CDCl}_3$ )  $\delta$  8.50 (d,  $J = 4.0$  Hz, 1H), 8.00 (d,  $J = 8.4$  Hz, 1H), 7.83 (s, 1H), 7.72–7.68 (m, 1H), 7.59 (d,  $J = 8.4$  Hz, 1H), 7.50 (t,  $J = 7.2$  Hz, 1H), 7.42–7.35 (m, 2H), 7.18 (dd,  $J = 6.4, 5.3$  Hz, 1H), 4.55 (t,  $J = 6.4$  Hz, 2H), 2.34 (t,  $J = 7.2$  Hz, 2H), 1.94–1.87 (m, 2H), 1.82–1.76 (m, 8H), 1.67–1.61 (m, 2H).  $^{13}\text{C}$  NMR (100 MHz,  $\text{CDCl}_3$ )  $\delta$  171.7, 164.4, 147.5, 143.3, 137.0, 127.9, 127.3, 124.5, 121.7, 120.0, 119.4, 108.6, 80.7, 77.5, 77.2, 76.8, 56.3, 37.1, 27.8, 27.5, 25.1. HRMS (EI-TOF) calc. for  $\text{C}_{20}\text{H}_{25}\text{N}_5\text{O}_2$  ( $\text{M}^+$ ): 367.2008, found: 367.2009.

#### 4-(1,3-Dioxoisindolin-2-yl)-*N*-(2-(pyridin-2-yl)propan-2-yl)butanamide **17s**



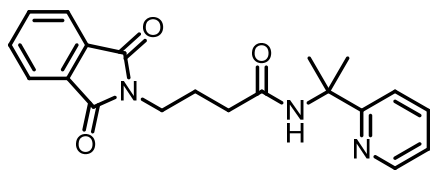

The title compound **17s** was prepared according to the general procedure (Method A).  $R_f = 0.65$  (ethyl acetate).  $^1\text{H}$  NMR (400 MHz,  $\text{CDCl}_3$ )  $\delta$  8.49 (d,  $J = 4.4$  Hz, 1H), 7.84 – 7.82 (m, 2H), 7.71 – 7.67 (m, 4H), 7.39 (d,  $J = 8.0$  Hz, 1H), 7.16 (dd,  $J = 6.4, 5.2$  Hz, 1H), 3.78 (t,  $J = 6.8$  Hz, 2H), 2.31 (t,  $J = 7.6$  Hz, 2H), 2.08 – 2.03 (m, 2H), 1.71 (s, 6H).  $^{13}\text{C}$  NMR (100 MHz,  $\text{CDCl}_3$ )  $\delta$  172.4, 164.6, 147.7, 137.7, 137.0, 128.5, 128.0, 127.9, 121.9, 119.3, 77.5, 77.3, 77.2, 76.8, 72.2, 56.1, 27.7, 27.4, 18.9. HRMS (EI-TOF) calc. for  $\text{C}_{20}\text{H}_{21}\text{N}_3\text{O}_3$  ( $\text{M}^+$ ): 351.1583, found: 351.1587.

#### 6-(1,3-Dioxisoindolin-2-yl)-N-(2-(pyridin-2-yl)propan-2-yl)hexanamide **18s**

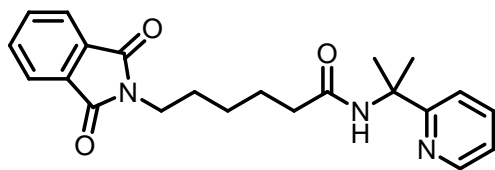

The title compound **18s** was prepared according to the general procedure (Method A).  $R_f = 0.58$  (ethyl acetate).  $^1\text{H}$  NMR (400 MHz,  $\text{CDCl}_3$ )  $\delta$  8.49 (d,  $J = 4.8$  Hz, 1H), 7.82 – 7.80 (m, 2H), 7.71 – 7.68 (m, 4H), 7.37 (d,  $J = 8.0$  Hz, 1H), 7.19 – 7.16 (m, 1H), 3.68 (t,  $J = 7.2$  Hz, 2H), 2.25 (t,  $J = 7.2$  Hz, 2H), 1.74 – 1.66 (m, 10H), 1.43 – 1.37 (m, 2H).  $^{13}\text{C}$  NMR (100 MHz,  $\text{CDCl}_3$ )  $\delta$  172.0, 168.5, 164.7, 147.7, 137.1, 133.9, 132.2, 123.2, 121.9, 119.5, 56.4, 37.9, 37.5, 28.5, 27.6, 26.5, 25.3. HRMS (EI-TOF) calc. for  $\text{C}_{22}\text{H}_{25}\text{N}_3\text{O}_3$  ( $\text{M}^+$ ): 379.1896, found: 379.1895.

#### 3-Methoxy-N-(2-(pyridin-2-yl)propan-2-yl)propanamide **19s**

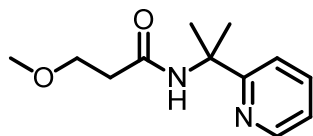

The title compound **19s** was prepared according to the general procedure (Method B).  $R_f = 0.35$  (ethyl acetate).  $^1\text{H}$  NMR (400 MHz,  $\text{CDCl}_3$ )  $\delta$  8.51 (d,  $J = 4.0$  Hz, 1H), 7.97 (s, 1H), 7.69 (t,  $J = 3.6$  Hz, 1H), 7.40 (d,  $J = 8.0$  Hz, 1H), 7.19 – 7.16 (m, 1H), 3.69 (t,  $J = 5.6$  Hz, 2H), 3.40 (s, 3H), 2.51 (t,  $J = 6.0$  Hz, 2H), 1.75 (s, 6H).  $^{13}\text{C}$  NMR (100 MHz,  $\text{CDCl}_3$ )  $\delta$  170.5, 164.7, 127.8, 137.1, 121.9, 119.5, 69.0, 58.9, 56.8, 38.2, 27.7. HRMS (EI-TOF) calc. for  $\text{C}_{12}\text{H}_{18}\text{N}_2\text{O}_2$  ( $\text{M}^+$ ): 222.1368, found: 222.1371.

#### ***N*-(2-(Pyridin-2-yl)propan-2-yl)oleamide 20s**

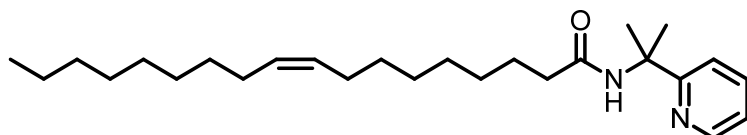

The title compound **20s** was prepared according to the general procedure (Method A).  $R_f = 0.65$  (1/ 1 petroleum ether/ ethyl acetate).  $^1\text{H}$  NMR (400 MHz,  $\text{CDCl}_3$ )  $\delta$  8.51 (d,  $J = 4.8$  Hz, 1H), 7.73 – 7.69 (m, 2H), 7.40 (d,  $J = 8.0$  Hz, 1H), 7.18 (dd,  $J = 7.2$ , 6.0 Hz, 1H), 5.35 - 5.33 (m, 2H), 2.24 (t,  $J = 7.6$  Hz, 2H), 2.04 – 1.99 (m, 4H), 1.74 (s, 6H), 1.67 – 1.63 (m, 2H), 1.31 – 1.26 (m, 22H), 0.87 (t,  $J = 6.4$  Hz, 3H).  $^{13}\text{C}$  NMR (100 MHz,  $\text{CDCl}_3$ )  $\delta$  172.6, 164.8, 147.7, 137.2, 130.1, 123.0, 121.9, 119.6, 77.5, 77.2, 76.8, 56.4, 37.9, 32.0, 29.9, 29.8, 29.8, 29.6, 29.4, 29.4, 29.4, 27.7, 27.3, 25.9, 22.8. HRMS (EI-TOF) calc. for  $\text{C}_{26}\text{H}_{44}\text{N}_2\text{O}$  ( $\text{M}^+$ ): 400.3454, found: 400.3452.

#### ***N*<sup>1</sup>,*N*<sup>10</sup>-Bis(2-(pyridin-2-yl)propan-2-yl)decanediamide 21s**

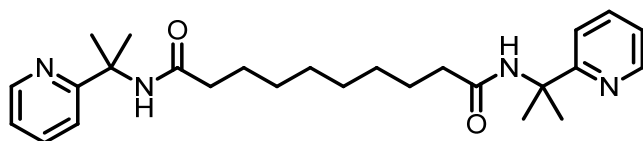

The title compound **21s** was prepared according to the general procedure (Method A).  $R_f = 0.70$  (1/ 2 petroleum ether/ ethyl acetate).  $^1\text{H}$  NMR (400 MHz,  $\text{CDCl}_3$ )  $\delta$  8.51 (d,  $J = 4.8$  Hz, 2H), 7.73 – 7.67 (m, 4H), 7.39 (d,  $J = 8.4$  Hz, 2H), 7.18 (dd,  $J = 7.2$ , 5.2 Hz, 2H), 2.24 (t,  $J = 7.2$  Hz, 4H), 1.74 (s, 12H), 1.66 – 1.63 (m, 4H), 1.32 (s, 8H).  $^{13}\text{C}$  NMR (100 MHz,  $\text{CDCl}_3$ )  $\delta$  172.5, 164.8, 147.7, 137.2, 121.9, 119.6, 56.5, 38.0, 29.4, 29.3, 27.7, 25.9. HRMS (EI-TOF) calc. for  $\text{C}_{26}\text{H}_{38}\text{N}_4\text{O}_2$  ( $\text{M}^+$ ): 438.2995, found: 438.2994.

### 2-Methoxy-*N*-(2-(pyridin-2-yl)propan-2-yl)butanamide **22s**

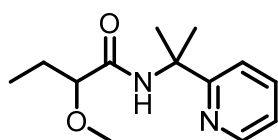

The title compound **22s** was prepared according to the general procedure (Method B).  $R_f = 0.61$  (1/ 1 petroleum ether/ ethyl acetate).  $^1\text{H}$  NMR (400 MHz,  $\text{CDCl}_3$ )  $\delta$  8.52 (d,  $J = 4.4$  Hz, 1H), 8.44 (s, 1H), 7.67 (dt,  $J = 8.0$ , 1.6 Hz, 1H), 7.37 (d,  $J = 8.0$  Hz, 1H), 7.15 (dd,  $J = 7.2$ , 5.6 Hz, 1H), 3.54 (dd,  $J = 6.0$ , 4.8 Hz, 1H), 3.43 (s, 3H), 1.85 – 1.70 (m, 8H), 0.93 (t,  $J = 7.2$  Hz, 3H).  $^{13}\text{C}$  NMR (100 MHz,  $\text{CDCl}_3$ )  $\delta$  171.6, 164.6, 148.0, 136.9, 121.8, 119.4, 84.0, 58.1, 56.2, 27.6, 27.6, 25.5, 9.0. HRMS (EI-TOF) calc. for  $\text{C}_{13}\text{H}_{20}\text{N}_2\text{O}_2$  ( $\text{M}^+$ ): 236.1525, found: 236.1526.

### (*R*)-2-(Benzyloxy)-*N*-(2-(pyridin-2-yl)propan-2-yl)propanamide **23s**

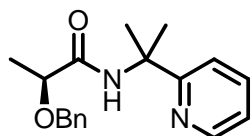

The title compound **23s** was prepared according to the general procedure (Method B).  $R_f = 0.66$  (1/ 1 petroleum ether/ ethyl acetate).  $^1\text{H}$  NMR (400 MHz,  $\text{CDCl}_3$ )  $\delta$  8.94 (s, 1H), 8.49 (d,  $J = 4.8$  Hz, 1H), 7.70 - 7.66 (m, 1H), 7.48 (d,  $J = 7.6$  Hz, 2H), 7.37 –

7.27 (m, 3H), 7.30 (t,  $J = 7.2$  Hz, 1H), 7.16 (dd,  $J = 7.2, 5.2$  Hz, 1H), 4.66 (AB, 1H), 4.59 (AB, 1H), 3.96 (q,  $J = 6.8$  Hz, 1H), 1.78 (d,  $J = 2.8$  Hz, 6H), 1.47 (d,  $J = 6.8$  Hz, 3H).  $^{13}\text{C}$  NMR (100 MHz,  $\text{CDCl}_3$ )  $\delta$  172.4, 164.6, 147.8, 137.7, 137.0, 128.5, 128.0, 127.9, 121.9, 119.3, 77.5, 77.3, 77.2, 76.8, 72.2, 56.1, 27.7, 27.4, 18.9. HRMS (EI-TOF) calc. for  $\text{C}_{18}\text{H}_{22}\text{N}_2\text{O}_2$  ( $\text{M}^+$ ): 298.1681, found: 298.1689.

**(R)-2-Methoxy-N-(2-(pyridin-2-yl)propan-2-yl)propanamide 24s**

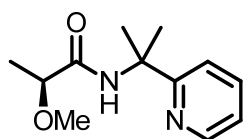

The title compound **24s** was prepared according to the general procedure (Method B).  $R_f = 0.55$  (1/2 petroleum ether/ ethyl acetate).  $^1\text{H}$  NMR (400 MHz,  $\text{CDCl}_3$ )  $\delta$  8.55 – 8.53 (m, 1H), 8.43 (s, 1H), 7.69 (dt,  $J = 8.0, 2.0$  Hz, 1H), 7.38 (td,  $J = 8.0, 0.8$  Hz, 1H), 7.19 – 7.15 (m, 1H), 3.71 (q,  $J = 6.8$  Hz, 1H), 3.45 (s, 3H), 1.76 (d,  $J = 1.6$  Hz, 6H), 1.39 (d,  $J = 6.8$  Hz, 3H).  $^{13}\text{C}$  NMR (100 MHz,  $\text{CDCl}_3$ )  $\delta$  172.4, 164.7, 148.1, 137.0, 121.9, 119.4, 79.2, 77.5, 77.2, 76.8, 57.7, 56.2, 27.7, 27.6, 18.4. HRMS (EI-TOF) calc. for  $\text{C}_{12}\text{H}_{18}\text{N}_2\text{O}_2$  ( $\text{M}^+$ ): 222.1368, found: 222.1371.

**N-(2-(Pyridin-2-yl)propan-2-yl)propionamide 25s**

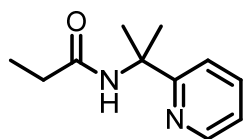

The title compound **25s** was prepared according to the general procedure (Method B).  $R_f = 0.50$  (ethyl acetate).  $^1\text{H}$  NMR (400 MHz,  $\text{CDCl}_3$ )  $\delta$  8.49 (d,  $J = 4.4$  Hz, 1H), 7.71 – 7.67 (m, 2H), 7.38 (d,  $J = 8.0$  Hz, 1H), 7.17 (dd,  $J = 6.8, 4.8$  Hz, 1H), 2.28 (q,  $J = 7.6$  Hz, 2H), 1.73 (s, 6H), 1.16 (t,  $J = 7.6$  Hz, 3H).  $^{13}\text{C}$  NMR (100 MHz,  $\text{CDCl}_3$ )  $\delta$

173.1, 164.8, 147.7, 137.2, 121.9, 119.6, 56.4, 30.9, 27.7, 10.0. HRMS (EI-TOF) calc. for  $C_{11}H_{16}N_2O$  ( $M^+$ ): 192.1263, found: 192.1258.

***N*-(2-(Pyridin-2-yl)propan-2-yl)isobutyramide 27s**

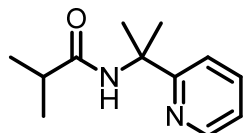

The title compound **27s** was prepared according to the general procedure (Method B).  $R_f$  = 0.47 (1/ 1 petroleum ether/ ethyl acetate).  $^1H$  NMR (400 MHz,  $CDCl_3$ )  $\delta$  8.51 (d,  $J$  = 4.8 Hz, 1H), 7.78 (s, 1H), 7.71 (t,  $J$  = 8.0 Hz, 1H), 7.40 (d,  $J$  = 8.0 Hz, 1H), 7.19 (t,  $J$  = 6.0 Hz, 1H), 2.48 – 2.42 (m, 1H), 1.75 (s, 6H), 1.19 (d,  $J$  = 6.8 Hz, 6H).  $^{13}C$  NMR (100 MHz,  $CDCl_3$ )  $\delta$  176.4, 164.9, 147.7, 137.2, 121.9, 119.6, 56.2, 36.6, 27.6, 19.9. HRMS (EI-TOF) calc. for  $C_{12}H_{18}N_2O$  ( $M^+$ ): 206.1419, found: 206.1419.

***N*-(2-(Pyridin-2-yl)propan-2-yl)benzamide 28s**

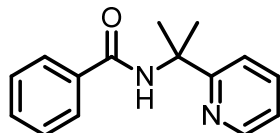

The title compound **28s** was prepared according to the general procedure (Method A).  $R_f$  = 0.75 (1/2 petroleum ether/ ethyl acetate).  $^1H$  NMR (400 MHz,  $CDCl_3$ )  $\delta$  8.88 (s, 1H), 8.54 (d,  $J$  = 4.0 Hz, 1H), 7.90 (dd,  $J$  = 7.6, 0.8 Hz, 2H), 7.72 (dt,  $J$  = 8.0, 1.2 Hz, 1H), 7.47 – 7.41 (m, 4H), 7.19 (dd,  $J$  = 7.2, 5.6 Hz, 1H), 1.86 (s, 6H).  $^{13}C$  NMR (100 MHz,  $CDCl_3$ )  $\delta$  166.3, 164.8, 147.7, 137.4, 136.1, 131.2, 128. 6, 127.1, 122.1, 119.7, 77.5, 77.2, 76.8, 56.7, 27.6. HRMS (EI-TOF) calc. for  $C_{15}H_{16}N_2O$  ( $M^+$ ): 240.1263, found: 240.1259.

**4-Methyl-*N*-(2-(pyridin-2-yl)propan-2-yl)benzamide 29s**

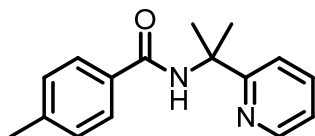

The title compound **29s** was prepared according to the general procedure (Method A).  $R_f = 0.79$  (1/ 1 petroleum ether/ ethyl acetate).  $^1\text{H}$  NMR (400 MHz,  $\text{CDCl}_3$ )  $\delta$  8.78 (s, 1H), 8.56 (d,  $J = 4.4$  Hz, 1H), 7.80 (d,  $J = 8.0$  Hz, 2H), 7.75 (dt,  $J = 8.0, 1.6$  Hz, 1H), 7.47 (d,  $J = 8.0$  Hz, 1H), 7.26 – 7.21 (m, 3H), 2.40 (s, 3H), 1.86 (s, 6H).  $^{13}\text{C}$  NMR (100 MHz,  $\text{CDCl}_3$ )  $\delta$  166.4, 164.9, 147.7, 141.5, 137.4, 133.3, 127.1, 122.0, 119.7, 56.7, 27.7, 21.6. HRMS (EI-TOF) calc. for  $\text{C}_{16}\text{H}_{18}\text{N}_2\text{O}$  ( $\text{M}^+$ ): 254.1419, found: 254.1419.

#### 4-Methoxy-*N*-(2-(pyridin-2-yl)propan-2-yl)benzamide **30s**

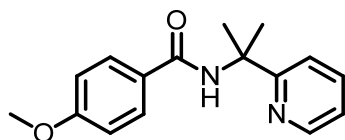

The title compound **30s** was prepared according to the general procedure (Method A).  $R_f = 0.40$  (2/ 1 petroleum ether/ ethyl acetate).  $^1\text{H}$  NMR (400 MHz,  $\text{CDCl}_3$ )  $\delta$  8.75 (s, 1H), 8.56 (d,  $J = 4.8$  Hz, 1H), 7.87 (d,  $J = 8.8$  Hz, 2H), 7.74 (dt,  $J = 8.0, 1.6$  Hz, 1H), 7.46 (d,  $J = 8.4$  Hz, 1H), 7.21 (dd,  $J = 7.2, 5.6$  Hz, 1H), 6.94 (d,  $J = 8.8$  Hz, 2H), 3.85 (s, 3H), 1.86 (s, 6H).  $^{13}\text{C}$  NMR (100 MHz,  $\text{CDCl}_3$ )  $\delta$  165.9, 164.9, 162.0, 147.7, 137.3, 128.8, 128.5, 122.0, 119.7, 113.7, 55.6, 55.5, 27.7. HRMS (EI-TOF) calc. for  $\text{C}_{16}\text{H}_{18}\text{N}_2\text{O}_2$  ( $\text{M}^+$ ): 270.1368, found: 270.1363.

#### 4-Nitro-*N*-(2-(pyridin-2-yl)propan-2-yl)benzamide **31s**

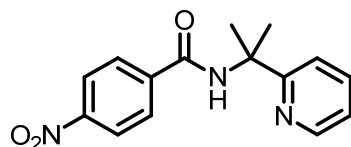

The title compound **31s** was prepared according to the general procedure (Method A).  $R_f = 0.71$  (1/ 1 petroleum ether/ ethyl acetate).  $^1\text{H}$  NMR (400 MHz,  $\text{CDCl}_3$ )  $\delta$  9.22 (s, 1H), 8.56 (d,  $J = 4.4$  Hz, 1H), 8.30 (d,  $J = 8.8$  Hz, 2H), 8.06 (d,  $J = 8.8$  Hz, 2H), 7.79 (dt,  $J = 9.2, 8.0$  Hz, 1H), 7.48 (d,  $J = 8.0$  Hz, 1H), 7.28 – 7.25 (m, 1H), 1.88 (s, 6H).  $^{13}\text{C}$  NMR (100 MHz,  $\text{CDCl}_3$ )  $\delta$  164.2, 164.1, 149.5, 147.6, 141.8, 137.7, 128.3, 123.8, 122.4, 119.7, 77.5, 77.2, 76.8, 57.0, 27.4. HRMS (EI-TOF) calc. for  $\text{C}_{15}\text{H}_{15}\text{N}_3\text{O}_3$  ( $\text{M}^+$ ): 285.1113, found: 285.1111.

***N*-(2-(Pyridin-2-yl)propan-2-yl)-3-(trifluoromethyl)benzamide 32s**

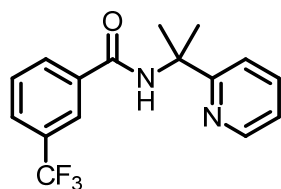

The title compound **32s** was prepared according to the general procedure (Method A).  $R_f = 0.57$  (3/ 1 petroleum ether/ ethyl acetate).  $^1\text{H}$  NMR (400 MHz,  $\text{CDCl}_3$ )  $\delta$  9.04 (s, 1H), 8.57 (d,  $J = 4.4$  Hz, 1H), 8.18 (s, 1H), 8.07 (d,  $J = 7.6$  Hz, 1H), 7.80 – 7.73 (m, 2H), 7.58 (t,  $J = 7.6$  Hz, 1H), 7.48 (d,  $J = 8.0$  Hz, 1H), 7.27 – 7.24 (m, 1H), 1.88 (s, 6H).  $^{13}\text{C}$  NMR (100 MHz,  $\text{CDCl}_3$ )  $\delta$  164.9, 164.4, 147.6, 137.6, 136.9, 131.1 (q,  $J_{\text{C-F}} = 32.0$  Hz), 130.3, 129.1, 127.8 (q,  $J_{\text{C-F}} = 3.0$  Hz), 124.4 (q,  $J_{\text{C-F}} = 4.0$  Hz), 124.0 (q,  $J_{\text{C-F}} = 271.0$  Hz), 122.3, 119.7, 56.9, 27.5. HRMS (EI-TOF) calc. for  $\text{C}_{16}\text{H}_{15}\text{F}_3\text{N}_2\text{O}$  ( $\text{M}^+$ ): 308.1136, found: 308.1134.

**2-Phenyl-*N*-(2-(pyridin-2-yl)propan-2-yl)acetamide 33s**

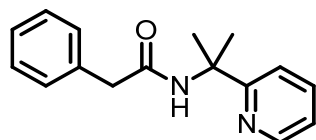

The title compound **33s** was prepared according to the general procedure (Method A).  $R_f = 0.48$  (1/ 1 petroleum ether/ ethyl acetate).  $^1\text{H}$  NMR (400 MHz,  $\text{CDCl}_3$ )  $\delta$  8.38 (d,

$J = 4.8$  Hz, 1H), 7.81 (s, 1H), 7.67 (t,  $J = 8.0$  Hz, 3H), 7.38 – 7.28 (m, 6H), 7.14 (dd,  $J = 7.2, 5.6$  Hz, 1H), 3.61 (s, 2H), 1.72 (s, 6H).  $^{13}\text{C}$  NMR (100 MHz,  $\text{CDCl}_3$ )  $\delta$  170.2, 164.6, 147.6, 137.1, 135.7, 129.6, 128.9, 127.0, 121.9, 119.5, 77.5, 77.2, 76.8, 56.6, 45.1, 27.6. HRMS (EI-TOF) calc. for  $\text{C}_{16}\text{H}_{18}\text{N}_2\text{O}$  ( $\text{M}^+$ ): 254.1419, found: 254.1418.

***N*-(2-(Pyridin-2-yl)propan-2-yl)-2-(p-tolyl)acetamide 34s**

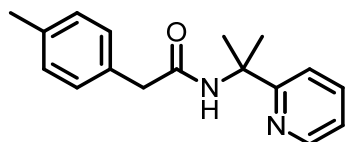

The title compound **34s** was prepared according to the general procedure (Method A).  $R_f = 0.49$  (1/ 1 petroleum ether/ ethyl acetate).  $^1\text{H}$  NMR (400 MHz,  $\text{CDCl}_3$ )  $\delta$  8.39 (d,  $J = 4.4$  Hz, 1H), 7.72 (s, 1H), 7.67 (t,  $J = 7.6$  Hz, 1H), 7.34 (d,  $J = 8.0$  Hz, 1H), 7.23 – 7.21 (m, 1H), 7.17 – 7.13 (m, 3H), 3.56 (s, 2H), 2.35 (s, 3H), 1.71 (s, 6H).  $^{13}\text{C}$  NMR (100 MHz,  $\text{CDCl}_3$ )  $\delta$  166.4, 164.9, 147.7, 141.5, 137.4, 133.3, 129.2, 127.1, 122.0, 119.7, 77.5, 77.2, 76.8, 56.7, 27.7, 21.6. HRMS (EI-TOF) calc. for  $\text{C}_{17}\text{H}_{20}\text{N}_2\text{O}$  ( $\text{M}^+$ ): 268.1576, found: 268.1573.

**2-(4-Methoxyphenyl)-*N*-(2-(pyridin-2-yl)propan-2-yl)acetamide 35s**

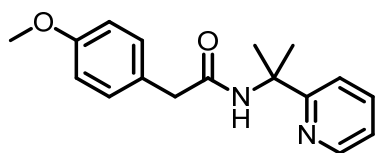

The title compound **35s** was prepared according to the general procedure (Method A).  $R_f = 0.51$  (1/ 1 petroleum ether/ ethyl acetate).  $^1\text{H}$  NMR (400 MHz,  $\text{CDCl}_3$ )  $\delta$  8.40 (d,  $J = 4.8$  Hz, 1H), 7.74 (s, 1H), 7.67 (dt,  $J = 9.2, 8.0$  Hz, 1H), 7.34 (d,  $J = 8.0$  Hz, 1H), 7.25 (d,  $J = 8.8$  Hz, 1H), 7.16 – 7.13 (m, 1H), 6.90 (d,  $J = 8.4$  Hz, 1H), 3.82 (s, 3H), 3.55 (s, 2H), 1.71 (s, 6H).  $^{13}\text{C}$  NMR (100 MHz,  $\text{CDCl}_3$ )  $\delta$  170.6, 164.6, 158.7, 147.6,



137.1, 130.6, 127.8, 119.4, 114.3, 56.6, 55.4, 44.2, 27.6. HRMS (EI-TOF) calc. for  $C_{17}H_{20}N_2O_2$  ( $M^+$ ): 284.1525, found: 284.1527.

**2-(4-Fluorophenyl)-N-(2-(pyridin-2-yl)propan-2-yl)acetamide 36s**

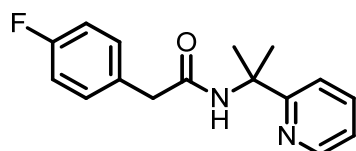

The title compound **36s** was prepared according to the general procedure (Method A).  $R_f$  = 0.39 (1/ 2 petroleum ether/ ethyl acetate).  $^1H$  NMR (400 MHz,  $CDCl_3$ )  $\delta$  8.40 (d,  $J$  = 4.4 Hz, 1H), 7.90 (s, 1H), 7.69 (t,  $J$  = 8.0 Hz, 1H), 7.35 (d,  $J$  = 8.0 Hz, 1H), 7.31 – 7.28 (m, 2H), 7.18 – 7.15 (m, 1H), 7.04 (t,  $J$  = 8.4 Hz, 2H), 3.58 (s, 2H), 1.72 (s, 6H).  $^{13}C$  NMR (100 MHz,  $CDCl_3$ )  $\delta$  170.0, 164.5 (d,  $J_{C-F}$  = 3.0 Hz), 162.1 (d,  $J_{C-F}$  = 242.0 Hz), 147.6, 137.2 (d,  $J_{C-F}$  = 3.0 Hz), 131.5, 131.1 (d,  $J_{C-F}$  = 8.0 Hz), 122.0 (d,  $J_{C-F}$  = 3.0 Hz), 119.5, 115.6 (d,  $J_{C-F}$  = 21.0 Hz), 56.6, 44.2, 27.5. HRMS (EI-TOF) calc. for  $C_{16}H_{17}FN_2O$  ( $M^+$ ): 272.1325, found: 272.1326.

**2-Phenyl-N-(2-(pyridin-2-yl)propan-2-yl)acetamide 37s**

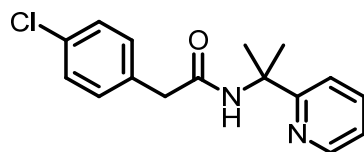

The title compound **37s** was prepared according to the general procedure (Method A).  $R_f$  = 0.51 (1/2 petroleum ether/ ethyl acetate).  $^1H$  NMR (400 MHz,  $CDCl_3$ )  $\delta$  8.41 (d,  $J$  = 4.8 Hz, 1H), 7.94 (s, 1H), 7.69 (dt,  $J$  = 8.0, 1.2 Hz, 1H), 7.36 – 7.31 (m, 3H), 7.28 – 7.26 (m, 2H), 7.17 (dd,  $J$  = 6.8, 5.2 Hz, 1H), 3.57 (s, 2H), 1.72 (s, 6H).  $^{13}C$  NMR (100 MHz,  $CDCl_3$ )  $\delta$  169.6, 164.4, 147.6, 137.3, 134.2, 132.9, 130.9, 128.9, 122.0, 119.5, 56.6, 44.31, 27.5. HRMS (EI-TOF) calc. for  $C_{16}H_{17}ClN_2O$  ( $M^+$ ): 288.1029, found: 288.1026.

### 2-(4-Bromophenyl)-*N*-(2-(pyridin-2-yl)propan-2-yl)acetamide **38s**

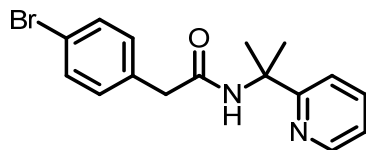

The title compound **38s** was prepared according to the general procedure (Method A).  $R_f = 0.38$  (1/ 1 petroleum ether/ ethyl acetate).  $^1\text{H}$  NMR (400 MHz,  $\text{CDCl}_3$ )  $\delta$  8.41 (d,  $J = 4.4$  Hz, 1H), 7.93 (s, 1H), 7.69 (t,  $J = 7.6$  Hz, 1H), 7.47 (d,  $J = 8.0$  Hz, 2H), 7.35 (d,  $J = 8.0$  Hz, 1H), 7.22 – 7.16 (m, 3H), 3.56 (s, 2H), 1.72 (s, 6H).  $^{13}\text{C}$  NMR (100 MHz,  $\text{CDCl}_3$ )  $\delta$  169.5, 164.4, 147.6, 137.3, 134.7, 131.9, 131.3, 122.0, 121.0, 119.5, 56.6, 44.4, 27.5. HRMS (EI-TOF) calc. for  $\text{C}_{16}\text{H}_{17}\text{BrN}_2\text{O}$  ( $\text{M}^+$ ): 332.0524, found: 332.0525.

### *N*-(2-(Pyridin-2-yl)propan-2-yl)-2-(3-(trifluoromethyl)phenyl)acetamide **39s**

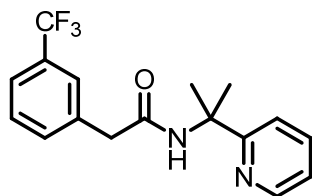

The title compound **39s** was prepared according to the general procedure (Method A).  $R_f = 0.59$  (1/ 2 petroleum ether/ ethyl acetate).  $^1\text{H}$  NMR (400 MHz,  $\text{CDCl}_3$ )  $\delta$  8.46 (d,  $J = 4.0$  Hz, 1H), 7.96 (s, 1H), 7.83 (s, 1H), 7.59 (s, 1H), 7.55 – 7.52 (m, 2H), 7.47 – 7.43 (m, 2H), 7.31 – 7.28 (m, 1H), 3.70 (s, 2H), 1.76 (s, 6H).  $^{13}\text{C}$  NMR (100 MHz,  $\text{CDCl}_3$ )  $\delta$  169.5, 163.7, 146.3, 138.3, 136.5, 133.0, 130.7 (q,  $J_{\text{C-F}} = 32.0$  Hz), 139.0, 126.1 (q,  $J_{\text{C-F}} = 4.0$  Hz), 124.2 (q,  $J_{\text{C-F}} = 271.0$  Hz), 123.7 (q,  $J_{\text{C-F}} = 4.0$  Hz), 122.4, 120.1, 56.3, 43.9, 27.3. HRMS (EI-TOF) calc. for  $\text{C}_{17}\text{H}_{17}\text{F}_3\text{N}_2\text{O}$  ( $\text{M}^+$ ): 322.1293, found: 322.1293.

### Optimization of Reaction Conditions:

**Table S3. Optimization of Reaction Conditions**

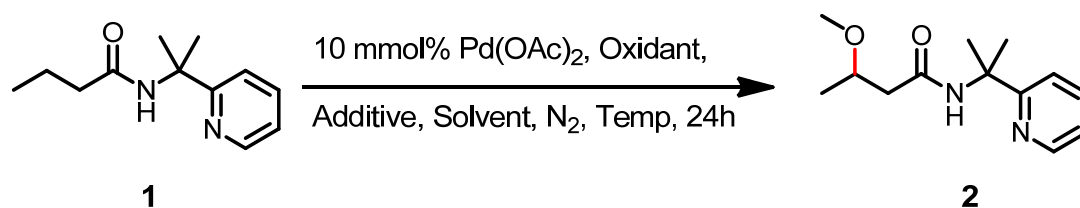

| Entry     | Oxidant (equiv)                                    | Additive                                                                            | Solvent                             | T/°C      | Yield/%               |
|-----------|----------------------------------------------------|-------------------------------------------------------------------------------------|-------------------------------------|-----------|-----------------------|
| 1         | PhI(OAc) <sub>2</sub> (3.0)                        | Ac <sub>2</sub> O 10eq                                                              | MeOH                                | 90        | 63                    |
| 2         | PhI(OAc) <sub>2</sub> (3.0)                        | -                                                                                   | MeOH                                | 90        | 50                    |
| 3         | PhI(OAc) <sub>2</sub> (3.0)                        | -                                                                                   | MeOH                                | 120       | 51                    |
| 4         | PhI(OAc) <sub>2</sub> (3.0)                        | -                                                                                   | MeOH : toluene = 1:1                | 90        | 74                    |
| 5         | PhI(OAc) <sub>2</sub> (3.0)                        | -                                                                                   | MeOH : <i>o</i> -xylene = 1:1       | 90        | 73                    |
| 6         | PhI(OAc) <sub>2</sub> (3.0)                        | -                                                                                   | MeOH : <i>m</i> -xylene = 1:1       | 90        | 79                    |
| 7         | PhI(OAc) <sub>2</sub> (3.0)                        | -                                                                                   | MeOH : <i>p</i> -xylene = 1:1       | 90        | 72                    |
| 8         | PhI(OAc) <sub>2</sub> (3.0)                        | -                                                                                   | MeOH : <i>o</i> -xylene = 1:2       | 90        | 73                    |
| 9         | PhI(OAc) <sub>2</sub> (3.0)                        | -                                                                                   | MeOH : <i>o</i> -xylene = 1:4       | 90        | 61                    |
| 10        | PhI(OAc) <sub>2</sub> (3.0)                        | -                                                                                   | MeOH : <i>o</i> -xylene = 1:6       | 90        | 52                    |
| 11        | PhI(OAc) <sub>2</sub> (3.0)                        | -                                                                                   | MeOH : <i>o</i> -xylene = 1:10      | 90        | 49                    |
| 12        | PhI(OAc) <sub>2</sub> (3.0)                        | -                                                                                   | MeOH : <i>o</i> -xylene = 1:100     | 90        | 42                    |
| 13        | PhI(OAc) <sub>2</sub> (3.0)                        | -                                                                                   | MeOH : <i>o</i> -xylene = 100:1     | 90        | 43                    |
| 14        | PhI(OAc) <sub>2</sub> (3.0)                        | -                                                                                   | MeOH : <i>o</i> -xylene = 10:1      | 90        | 54                    |
| 15        | PhI(OAc) <sub>2</sub> (3.0)                        | -                                                                                   | MeOH : <i>o</i> -xylene = 6:1       | 90        | 60                    |
| 16        | PhI(OAc) <sub>2</sub> (3.0)                        | -                                                                                   | MeOH : <i>o</i> -xylene = 4:1       | 90        | 69                    |
| 17        | PhI(OAc) <sub>2</sub> (3.0)                        | -                                                                                   | MeOH : <i>o</i> -xylene = 2:1       | 90        | 71                    |
| 18        | PhI(TFA) <sub>2</sub> (3.0)                        | -                                                                                   | MeOH : <i>o</i> -xylene = 1:1       | 90        | 0                     |
| 19        | PhI(OPiv) <sub>2</sub> (3.0)                       | -                                                                                   | MeOH : <i>o</i> -xylene = 1:1       | 90        | 67                    |
| 20        | PhI(OPiv) <sub>2</sub> (3.0)                       | -                                                                                   | MeOH : <i>m</i> -xylene = 1:1       | 90        | 64                    |
| 21        | PhI(OAc) <sub>2</sub> (3.0)                        | 1-AdCOOH                                                                            | MeOH : <i>m</i> -xylene = 1:1       | 90        | 76                    |
| 22        | PhI(OAc) <sub>2</sub> (3.0)                        | 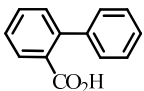 | MeOH : <i>m</i> -xylene = 1:1       | 90        | 66                    |
| 23        | PhI(OAc) <sub>2</sub> (3.0)                        | KHCO <sub>3</sub>                                                                   | MeOH : <i>m</i> -xylene = 1:1       | 90        | 62                    |
| 24        | KHSO <sub>6</sub> (3.0)                            | -                                                                                   | MeOH : <i>m</i> -xylene = 1:1       | 90        | 0                     |
| 25        | K <sub>2</sub> S <sub>2</sub> O <sub>8</sub> (3.0) | -                                                                                   | MeOH : <i>m</i> -xylene = 1:1       | 90        | 0                     |
| 26        | Oxone (3.0)                                        | -                                                                                   | MeOH : <i>m</i> -xylene = 1:1       | 90        | 0                     |
| 27        | NaIO <sub>3</sub> (3.0)                            | -                                                                                   | MeOH : <i>m</i> -xylene = 1:1       | 90        | 0                     |
| 28        | DDQ (3.0)                                          | -                                                                                   | MeOH : <i>m</i> -xylene = 1:1       | 90        | 0                     |
| 29        | Selectfluor (3.0)                                  | -                                                                                   | MeOH : <i>m</i> -xylene = 1:1       | 90        | 0                     |
| <b>30</b> | <b>PhI(OAc)<sub>2</sub> (3.0)</b>                  | -                                                                                   | <b>MeOH : <i>m</i>-xylene = 1:1</b> | <b>90</b> | <b>89<sup>a</sup></b> |
| 31        | PhI(OAc) <sub>2</sub> (3.0)                        | -                                                                                   | MeOH : <i>m</i> -xylene = 1:1       | 90        | 70 <sup>b</sup>       |
| <b>32</b> | <b>PhI(OAc)<sub>2</sub> (1.5)</b>                  | -                                                                                   | <b>MeOH : <i>m</i>-xylene = 1:1</b> | <b>90</b> | <b>80<sup>a</sup></b> |

<sup>a</sup>PhI(OAc)<sub>2</sub> was used after recrystallized from HOAc and Hex. <sup>b</sup>the reaction was carried on under the atmosphere of O<sub>2</sub>.

**General Procedure for the Alkoxylation of C(sp<sup>3</sup>)-H bonds:**

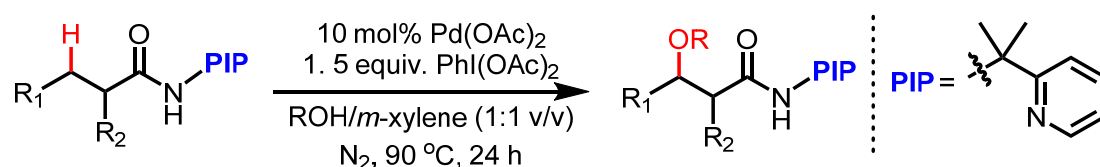

A mixture of substrate (0.2 mmol), Pd(OAc)<sub>2</sub> (4.5 mg, 10 mmol%), PhI(OAc)<sub>2</sub> (97 mg, 0.3 mmol), alcohol (1.0 mL) and *m*-xylene (1.0 mL) in a 30 mL Schlenk tube (purged with N<sub>2</sub>) was heated at 90 °C for 24 hours. The reaction mixture was cooled to RT, and concentrated *in vacuo*. The resulting residue was purified by flash chromatography to give the desired product.

**3-Methoxy-*N*-(2-(pyridin-2-yl)propan-2-yl)hexanamide **4****

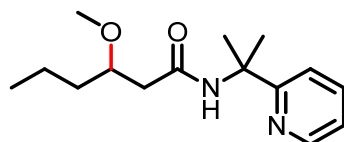

The title compound **4** was prepared according to the general procedure and was purified by flash chromatography (petroleum ether : ethyl acetate = 2 : 1). **4** was obtained as a yellow liquid (43.9 mg, 83%). *R<sub>f</sub>* = 0.25 (1/ 1 petroleum ether/ ethyl acetate). <sup>1</sup>H NMR (400 MHz, CDCl<sub>3</sub>) δ 8.52 (d, *J* = 4.5 Hz, 1H), 7.91 (s, 1H), 7.73 (t, *J* = 7.8 Hz, 1H), 7.43 (d, *J* = 8.0 Hz, 1H), 7.20 (t, *J* = 5.6 Hz, 1H), 3.67-3.57 (m, 1H), 3.39 (s, 3H), 2.42 (dd, *J* = 14.6, 7.6 Hz, 1H), 2.35 (dd, *J* = 14.6, 4.4 Hz, 1H), 1.74 (s, 3H), 1.74 (s, 3H), 1.59-1.43 (m, 2H), 1.43-1.29 (m, 2H), 0.91 (t, *J* = 7.2 Hz, 3H). <sup>13</sup>C NMR (100 MHz, CDCl<sub>3</sub>) δ 170.7, 164.5, 147.4, 137.6, 122.0, 119.8, 78.4, 57.2, 56.6, 42.6, 36.1, 27.7, 27.6, 18.5, 14.3. HRMS (EI-TOF) calc. for C<sub>15</sub>H<sub>24</sub>N<sub>2</sub>O<sub>2</sub> (M<sup>+</sup>): 264.1838, found: 264.1834.

### 3-Methoxy-5-methyl-N-(2-(pyridin-2-yl)propan-2-yl)hexanamide **5**

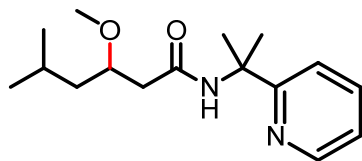

The title compound **5** was prepared according to the general procedure and was purified by flash chromatography (petroleum ether : ethyl acetate = 1 : 2). **5** was obtained as a colorless liquid (40.5 mg, 73%).  $R_f$  = 0.52 (1/ 2 petroleum ether/ ethyl acetate).  $^1\text{H}$  NMR (400 MHz,  $\text{CDCl}_3$ )  $\delta$  8.51 (d,  $J$  = 4.1 Hz, 1H), 7.89 (s, 1H), 7.69 (t,  $J$  = 7.7 Hz, 1H), 7.40 (d,  $J$  = 8.1 Hz, 1H), 7.17 (m, 1H), 3.69 (m, 1H), 3.40 (s, 3H), 2.39 (m, 2H), 1.75 (s, 6H), 1.53 (m, 1H), 1.29 (m, 2H), 0.92 (d,  $J$  = 5.3 Hz, 3H), 0.91 (d,  $J$  = 6.2 Hz, 3H).  $^{13}\text{C}$  NMR (100 MHz,  $\text{CDCl}_3$ )  $\delta$  170.5, 164.8, 147.9, 137.0, 121.9, 119.6, 57.2, 56.7, 43.7, 43.1, 27.7, 24.8, 23.1, 22.9. HRMS (EI-TOF) calc. for  $\text{C}_{16}\text{H}_{26}\text{N}_2\text{O}_2(\text{M}^+)$  : 278.1994, found: 278.2002.

### 3-Methoxy-3-phenyl-N-(2-(pyridin-2-yl)propan-2-yl)propanamide **6**

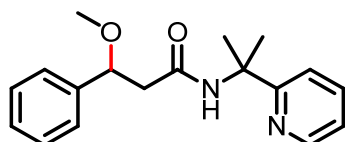

The title compound **6** was prepared according to the general procedure and was purified by flash chromatography (petroleum ether : ethyl acetate = 1 : 2). **6** was obtained as a light yellow liquid (59.1 mg, 89%).  $R_f$  = 0.57 (1/ 2 petroleum ether/ ethyl acetate).  $^1\text{H}$  NMR (400 MHz,  $\text{CDCl}_3$ )  $\delta$  8.50 (d,  $J$  = 4.7 Hz, 1H), 7.98 (s, 1H), 7.68 (t,  $J$  = 7.7 Hz, 1H), 7.36 (m, 5H), 7.28 (dd,  $J$  = 10.0, 5.8 Hz, 1H), 7.16 (m, 1H), 4.63 (dd,  $J$  = 9.3, 3.7 Hz, 1H), 3.30 (s, 3H), 2.75 (dd,  $J$  = 14.7, 9.4 Hz, 1H), 2.47 (dd,  $J$  = 14.8, 3.6 Hz, 1H), 1.75 (s, 3H), 1.70 (s, 3H).  $^{13}\text{C}$  NMR (100 MHz,  $\text{CDCl}_3$ )  $\delta$  169.7, 164.7, 147.8, 141.2, 137.0, 128.7, 128.0, 126.6, 121.8, 119.5, 80.7, 57.0, 56.8, 46.8, 27.7, 27.6. HRMS (EI-TOF) calc. for  $\text{C}_{18}\text{H}_{22}\text{N}_2\text{O}_2(\text{M}^+)$ : 298.1681, found: 298.1681.

### 3-Methoxy-4-phenyl-*N*-(2-(pyridin-2-yl)propan-2-yl)butanamide **7**

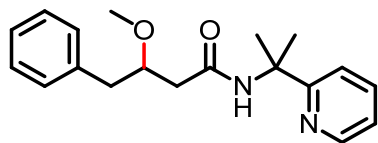

The title compound **7** was prepared according to the general procedure with 3.0 equiv of  $\text{PhI}(\text{OAc})_2$  and was purified by flash chromatography (petroleum ether : ethyl acetate = 1 : 2). **7** was obtained as a yellow liquid (55.9 mg, 90%).  $R_f = 0.61$  (1/ 2 petroleum ether/ ethyl acetate).  $^1\text{H}$  NMR (400 MHz,  $\text{CDCl}_3$ )  $\delta$  8.48 (d,  $J = 4.7$  Hz, 1H), 7.84 (s, 1H), 7.70 – 7.63 (m, 1H), 7.37 (d,  $J = 8.1$  Hz, 1H), 7.29 – 7.17 (m, 5H), 7.14 (dd,  $J = 7.1, 5.4$  Hz, 1H), 3.86 (p,  $J = 6.1$  Hz, 1H), 3.37 (s, 3H), 2.88 (dd,  $J = 13.7, 5.9$  Hz, 1H), 2.80 (dd,  $J = 13.7, 6.2$  Hz, 1H), 2.34 (d,  $J = 6.1$  Hz, 2H), 1.72 (s, 3H), 1.71 (s, 3H).  $^{13}\text{C}$  NMR (100 MHz,  $\text{CDCl}_3$ )  $\delta$  170.3, 164.7, 147.8, 138.1, 137.0, 129.7, 128.5, 126.4, 121.8, 119.5, 79.7, 57.7, 56.7, 42.5, 40.1, 27.7. HRMS (EI-TOF) calc. for  $\text{C}_{19}\text{H}_{24}\text{N}_2\text{O}_2$  ( $\text{M}^+$ ): 312.1838, found: 312.1829.

### 4-(4-Chlorophenyl)-3-methoxy-*N*-(2-(pyridin-2-yl)propan-2-yl)butanamide **8**

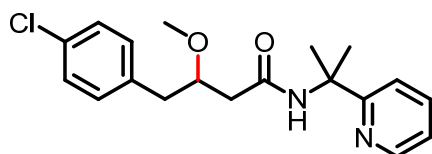

The title compound **8** was prepared according to the general procedure and was purified by flash chromatography (petroleum ether : ethyl acetate = 1 : 2). **8** was obtained as a light yellow liquid (62.2 mg, 90%).  $R_f = 0.42$  (1/ 1 petroleum ether/ ethyl acetate).  $^1\text{H}$  NMR (400 MHz,  $\text{CDCl}_3$ )  $\delta$  8.49 (d,  $J = 4.3$  Hz, 1H), 7.87 (s, 1H), 7.69 (t,  $J = 7.7$  Hz, 1H), 7.39 (d,  $J = 8.0$  Hz, 1H), 7.24 (d,  $J = 8.1$  Hz, 2H), 7.16 (m, 3H), 3.90 – 3.80 (m, 1H), 3.36 (s, 3H), 2.82 (d,  $J = 5.8$  Hz, 2H), 2.36 (d,  $J = 7.2$  Hz, 2H), 1.73 (s, 6H).  $^{13}\text{C}$  NMR (100 MHz,  $\text{CDCl}_3$ )  $\delta$  170.0, 164.5, 147.8, 137.1, 136.6,

131.1, 128.5, 121.9, 119.5, 79.4, 57.7, 56.7, 42.3, 39.4, 27.6. HRMS (EI-TOF) calc. for  $C_{19}H_{23}ClN_2O_2$  ( $M^+$ ): 346.1448, found: 346.1454.

**4-(4-Fluorophenyl)-3-methoxy-*N*-(2-(pyridin-2-yl)propan-2-yl)butanamide **9****

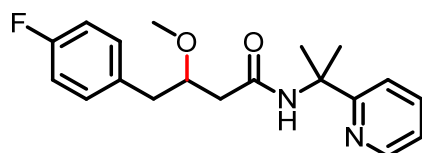

The title compound **9** was prepared according to the general procedure and was purified by flash chromatography (petroleum ether : ethyl acetate = 1 : 2). **9** was obtained as a colorless liquid (55.5 mg, 83%).  $R_f$  = 0.49 (1/ 1 petroleum ether/ ethyl acetate).  $^1H$  NMR (400 MHz,  $CDCl_3$ )  $\delta$  8.51 (d,  $J$  = 4.6 Hz, 1H), 7.85 (s, 1H), 7.72 (t,  $J$  = 7.6 Hz, 1H), 7.42 (d,  $J$  = 7.9 Hz, 1H), 7.18 (m, 3H), 6.96 (t,  $J$  = 8.5 Hz, 2H), 3.84 (m, 1H), 3.37 (s, 3H), 2.82 (m, 2H), 2.35 (m, 2H), 1.74 (s, 6H).  $^{13}C$  NMR (100 MHz,  $CDCl_3$ )  $\delta$  170.2, 164.4, 161.7 (d,  $J_{C-F}$  = 247.2 Hz), 147.5, 137.5, 133.8 (d,  $J_{C-F}$  = 4.0 Hz), 131.1 (d,  $J_{C-F}$  = 7.4 Hz), 122.0, 119.8, 115.2 (d,  $J_{C-F}$  = 21.0 Hz), 79.5, 57.7, 56.6, 42.2, 39.2, 27.7, 27.6. HRMS (EI-TOF) calc. for  $C_{19}H_{23}FN_2O_2$  ( $M^+$ ): 330.1744, found: 330.1748.

**6-Chloro-3-methoxy-*N*-(2-(pyridin-2-yl)propan-2-yl)hexanamide **10****

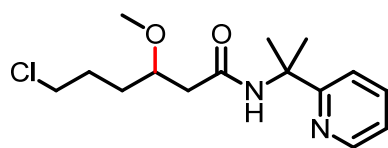

The title compound **10** was prepared according to the general procedure and was purified by flash chromatography (petroleum ether : ethyl acetate = 1 : 2). **10** was obtained as a colorless liquid (41.8 mg, 70%).  $R_f$  = 0.53 (1/ 1 petroleum ether/ ethyl acetate).  $^1H$  NMR (400 MHz,  $CDCl_3$ )  $\delta$  8.49 (d,  $J$  = 4.4 Hz, 1H), 7.93 (s, 1H), 7.68 (t,  $J$  = 7.6 Hz, 1H), 7.38 (d,  $J$  = 8.0 Hz, 1H), 7.20 – 7.11 (m, 1H), 3.66 (m, 1H), 3.53 (t,

$J = 6.5$  Hz, 2H), 3.38 (s, 3H), 2.47 (dd,  $J = 14.5, 7.3$  Hz, 1H), 2.32 (dd,  $J = 14.5, 4.4$  Hz, 1H), 1.89 – 1.78 (m, 2H), 1.72 (s, 6H), 1.69 – 1.57 (m, 3H).  $^{13}\text{C}$  NMR (100 MHz,  $\text{CDCl}_3$ )  $\delta$  170.1, 164.7, 147.9, 137.1, 121.9, 119.6, 77.9, 57.3, 56.8, 45.2, 42.7, 31.3, 28.4, 27.6. HRMS (EI-TOF) calc. for  $\text{C}_{15}\text{H}_{23}\text{ClN}_2\text{O}_2$  ( $\text{M}^+$ ): 298.1448, found: 298.1450.

### 6-Cyano-3-methoxy-*N*-(2-(pyridin-2-yl)propan-2-yl)hexanamide **11**

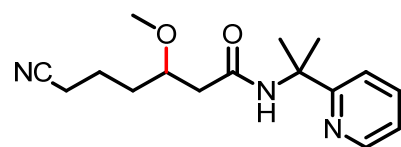

The title compound **11** was prepared according to the general procedure and was purified by flash chromatography (ethyl acetate). **11** was obtained as a colorless liquid (40.2 mg, 67%).  $R_f = 0.53$  (ethyl acetate).  $^1\text{H}$  NMR (400 MHz,  $\text{CDCl}_3$ )  $\delta$  8.51 (d,  $J = 4.6$  Hz, 1H), 7.96 (s, 1H), 7.72 (t,  $J = 7.7$  Hz, 1H), 7.40 (d,  $J = 8.0$  Hz, 1H), 7.19 (m, 1H), 3.69 (m, 1H), 3.40 (s, 3H), 2.51 (dd,  $J = 14.5, 6.9$  Hz, 1H), 2.38 (t,  $J = 6.8$  Hz, 2H), 2.33 (dd,  $J = 14.6, 5.2$  Hz, 1H), 1.80 (m, 2H), 1.75 (s, 6H), 1.69 (m, 2H).  $^{13}\text{C}$  NMR (100 MHz,  $\text{CDCl}_3$ )  $\delta$  169.9, 164.5, 147.8, 137.3, 122.0, 119.7, 119.6, 77.5, 57.4, 56.7, 42.3, 33.0, 27.6, 21.5, 17.4. HRMS (EI-TOF) calc. for  $\text{C}_{16}\text{H}_{23}\text{N}_3\text{O}_2$  ( $\text{M}^+$ ): 289.1790, found: 289.1796.

### 6-((*tert*-Butyldimethylsilyl)oxy)-*N*-(2-(pyridin-2-yl)propan-2-yl)hexanamide **12**

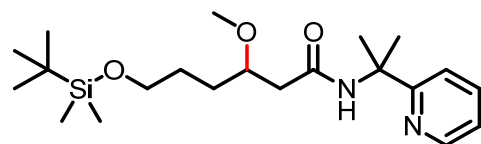

The title compound **12** was prepared according to the general procedure and was purified by flash chromatography (petroleum ether : ethyl acetate = 2 : 3). **12** was obtained as a yellow liquid (61.8 mg, 78%).  $R_f = 0.43$  (1/ 1 petroleum ether/ ethyl acetate).  $^1\text{H}$  NMR (400 MHz,  $\text{CDCl}_3$ )  $\delta$  8.51 (d,  $J = 4.4$  Hz, 1H), 7.93 (s, 1H), 7.69 (t,



$J = 7.6$  Hz, 1H), 7.40 (d,  $J = 8.0$  Hz, 1H), 7.17 (m, 1H), 3.66 (m, 1H), 3.61 (t,  $J = 5.2$  Hz, 2H), 3.40 (s, 3H), 2.44 (dd,  $J = 14.6, 7.8$  Hz, 1H), 2.35 (dd,  $J = 14.5, 4.1$  Hz, 1H), 1.75 (s, 3H), 1.74 (s, 3H), 1.61 (m, 4H), 0.88 (s, 9H), 0.05 (s, 6H).  $^{13}\text{C}$  NMR (100 MHz,  $\text{CDCl}_3$ )  $\delta$  170.5, 164.8, 147.9, 137.0, 121.9, 119.6, 78.4, 63.2, 57.2, 56.7, 42.9, 30.1, 28.4, 27.7, 27.7, 26.1, 18.5, -5.2. HRMS (EI-TOF) calc. for  $\text{C}_{21}\text{H}_{38}\text{N}_2\text{O}_3\text{Si}$  ( $\text{M}^+$ ): 394.2652, found: 394.2646.

#### 4-Methoxy-6-oxo-6-((2-(pyridin-2-yl)propan-2-yl)amino)hexyl acetate **13**

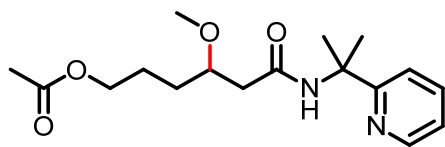

The title compound **13** was prepared according to the general procedure and was purified by flash chromatography (ethyl acetate). **13** was obtained as a colorless liquid (44.1 mg, 70%).  $R_f = 0.63$  (ethyl acetate).  $^1\text{H}$  NMR (400 MHz,  $\text{CDCl}_3$ )  $\delta$  8.50 (d,  $J = 4.0$  Hz, 1H), 7.94 (s, 1H), 7.69 (t,  $J = 7.6$  Hz, 1H), 7.39 (d,  $J = 8.0$  Hz, 1H), 7.17 (m, 1H), 4.06 (t,  $J = 6.3$  Hz, 2H), 3.66 (m, 1H), 3.39 (s, 3H), 2.46 (dd,  $J = 14.4, 7.3$  Hz, 1H), 2.33 (dd,  $J = 14.5, 4.4$  Hz, 1H), 2.01 (s, 3H), 1.73 (s, 6H), 1.68 (m, 2H), 1.61 (m, 2H).  $^{13}\text{C}$  NMR (100 MHz,  $\text{CDCl}_3$ )  $\delta$  171.3, 170.2, 164.6, 147.8, 137.1, 121.9, 119.5, 78.1, 64.5, 57.3, 56.7, 42.6, 30.4, 27.6, 24.5, 21.1. HRMS (EI-TOF) calc. for  $\text{C}_{17}\text{H}_{26}\text{N}_2\text{O}_4$  ( $\text{M}^+$ ): 322.1893, found: 322.1886.

#### 3,6-Dimethoxy-N-(2-(pyridin-2-yl)propan-2-yl)hexanamide **14**

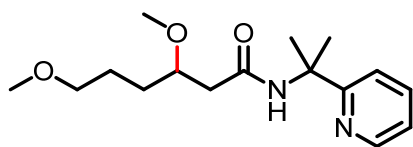

The title compound **14** was prepared according to the general procedure and was purified by flash chromatography (ethyl acetate). **14** was obtained as a colorless liquid (42.0 mg, 71%).  $R_f = 0.43$  (ethyl acetate).  $^1\text{H}$  NMR (400 MHz,  $\text{CDCl}_3$ )  $\delta$  8.50 (d,  $J =$

4.3 Hz, 1H), 7.91 (s, 1H), 7.69 (t,  $J = 7.7$  Hz, 1H), 7.39 (d,  $J = 8.0$  Hz, 1H), 7.17 (m, 1H), 3.65 (m, 1H), 3.39 (s, 3H), 3.37 (t,  $J = 5.9$  Hz, 2H), 3.31 (s, 3H), 2.44 (dd,  $J = 14.5, 7.7$  Hz, 1H), 2.34 (dd,  $J = 14.6, 4.2$  Hz, 1H), 1.74 (s, 6H), 1.62 (m, 4H).  $^{13}\text{C}$  NMR (100 MHz,  $\text{CDCl}_3$ )  $\delta$  170.4, 164.7, 147.9, 137.0, 121.9, 119.5, 78.3, 72.8, 58.6, 57.2, 56.7, 42.8, 30.4, 27.7, 27.7, 25.3. HRMS (EI-TOF) calc. for  $\text{C}_{16}\text{H}_{26}\text{N}_2\text{O}_3$  ( $\text{M}^+$ ): 294.1943, found: 294.1935.

### 3,4-Dimethoxy-*N*-(2-(pyridin-2-yl)propan-2-yl)butanamide **15**

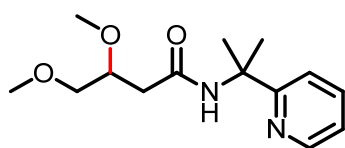

The title compound **15** was prepared according to the general procedure and was purified by flash chromatography (ethyl acetate). **15** was obtained as a light yellow liquid (46.7 mg, 88%).  $R_f = 0.49$  (ethyl acetate).  $^1\text{H}$  NMR (400 MHz,  $\text{CDCl}_3$ )  $\delta$  8.50 (d,  $J = 4.4$  Hz, 1H), 7.87 (s, 1H), 7.68 (t,  $J = 7.5$  Hz, 1H), 7.39 (d,  $J = 8.1$  Hz, 1H), 7.16 (dd,  $J = 6.9, 5.4$  Hz, 1H), 3.80 (m, 1H), 3.52 (dd,  $J = 10.6, 4.7$  Hz, 1H), 3.45 (s, 3H), 3.42 (m, 1H), 3.37 (s, 3H), 2.51 (dd,  $J = 14.5, 6.7$  Hz, 1H), 2.43 (dd,  $J = 14.5, 5.1$  Hz, 1H), 1.74 (s, 3H), 1.73 (s, 3H).  $^{13}\text{C}$  NMR (100 MHz,  $\text{CDCl}_3$ )  $\delta$  170.0, 164.6, 147.8, 137.1, 121.9, 119.5, 73.9, 59.4, 57.9, 56.8, 40.1, 27.7, 27.6. HRMS (EI-TOF) calc. for  $\text{C}_{14}\text{H}_{22}\text{N}_2\text{O}_3$  ( $\text{M}^+$ ): 266.1630, found: 266.1626.

### 6-((1H-Benzo[d][1,2,3]triazol-1-yl)oxy)-3-methoxy-*N*-(2-(pyridin-2-yl)propan-2-yl)hexanamide **16**

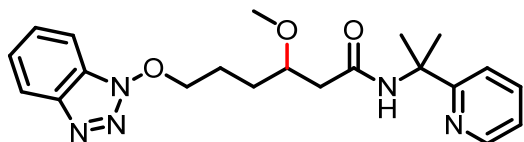

The title compound **16** was prepared according to the general procedure and was purified by flash chromatography (ethyl acetate). **16** was obtained as a light yellow

liquid (39.3 mg, 58%).  $R_f = 0.42$  (ethyl acetate).  $^1\text{H}$  NMR (400 MHz,  $\text{CDCl}_3$ )  $\delta$  8.50 (d,  $J = 4.5$  Hz, 1H), 7.99 (d,  $J = 8.4$  Hz, 1H), 7.95 (s, 1H), 7.68 (dt,  $J = 8.6, 2.0$  Hz, 1H), 7.57 (d,  $J = 8.3$  Hz, 1H), 7.48 (t,  $J = 7.6$  Hz, 1H), 7.42-7.33 (m, 2H), 7.16 (dd,  $J = 6.8, 5.3$  Hz, 1H), 4.56 (t,  $J = 6.4$  Hz, 2H), 3.74 (m, 1H), 3.41 (s, 3H), 2.54 (dd,  $J = 14.5, 7.0$  Hz, 1H), 2.37 (dd,  $J = 14.5, 5.1$  Hz, 1H), 1.97 (m, 2H), 1.85 (m, 2H), 1.74 (s, 6H).  $^{13}\text{C}$  NMR (100 MHz,  $\text{CDCl}_3$ )  $\delta$  170.0, 164.5, 147.8, 143.6, 137.1, 128.1, 127.5, 124.7, 121.9, 120.3, 119.5, 108.8, 80.9, 77.9, 57.3, 56.7, 42.4, 30.1, 27.6, 27.6, 24.1. HRMS (EI-TOF) calc. for  $\text{C}_{21}\text{H}_{27}\text{N}_5\text{O}_3$  ( $\text{M}^+$ ): 397.2114, found: 397.2116.

**4-(1,3-Dioxoisindolin-2-yl)-3-methoxy-*N*-(2-(pyridin-2-yl)propan-2-yl)butanamide 17**

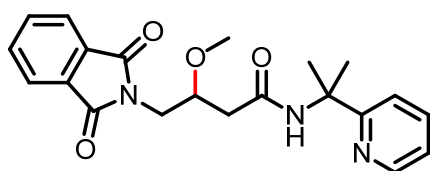

The title compound **17** was prepared according to the general procedure and was purified by flash chromatography (ethyl acetate). **17** was obtained as a colorless liquid (45.8 mg, 60%).  $R_f = 0.64$  (ethyl acetate).  $^1\text{H}$  NMR (400 MHz,  $\text{CDCl}_3$ )  $\delta$  8.50 (d,  $J = 4.4$  Hz, 1H), 7.85 (m, 3H), 7.72 (dd,  $J = 5.3, 3.2$  Hz, 2H), 7.68 (t,  $J = 8.1$  Hz, 1H), 7.39 (d,  $J = 7.9$  Hz, 1H), 7.16 (dd,  $J = 7.4, 5.2$  Hz, 1H), 3.98 (m, 1H), 3.87 (d,  $J = 5.1$  Hz, 2H), 3.49 (s, 3H), 2.46 (m, 1H), 1.73 (s, 3H), 1.71 (s, 3H).  $^{13}\text{C}$  NMR (100 MHz,  $\text{CDCl}_3$ )  $\delta$  169.4, 168.6, 164.6, 147.9, 137.0, 134.2, 132.2, 123.5, 121.9, 119.5, 76.6, 58.1, 56.9, 41.7, 40.1, 27.7. HRMS (EI-TOF) calc. for  $\text{C}_{21}\text{H}_{23}\text{N}_3\text{O}_4$  ( $\text{M}^+$ ): 381.1689, found: 381.1691.

**6-(1,3-Dioxoisindolin-2-yl)-3-methoxy-*N*-(2-(pyridin-2-yl)propan-2-yl)hexanamide 18**

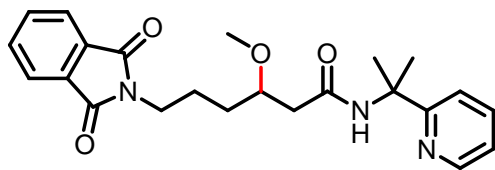

The title compound **18** was prepared according to the general procedure and was purified by flash chromatography (ethyl acetate). **18** was obtained as a yellow liquid (54.1 mg, 66%).  $R_f = 0.55$  (ethyl acetate).  $^1\text{H}$  NMR (400 MHz,  $\text{CDCl}_3$ )  $\delta$  8.49 (d,  $J = 4.5$  Hz, 1H), 7.87 (s, 1H), 7.81 (dd,  $J = 4.9, 3.1$  Hz, 2H), 7.72 – 7.64 (m, 3H), 7.37 (d,  $J = 8.0$  Hz, 1H), 7.19 – 7.13 (m, 1H), 3.74 – 3.63 (m, 3H), 3.38 (s, 3H), 2.43 (dd,  $J = 14.5, 7.5$  Hz, 1H), 2.32 (dd,  $J = 14.5, 4.4$  Hz, 1H), 1.78 (m, 2H), 1.71 (s, 3H), 1.70 (s, 3H), 1.59 (m, 2H).  $^{13}\text{C}$  NMR (100 MHz,  $\text{CDCl}_3$ )  $\delta$  170.1, 168.5, 164.6, 147.8, 137.0, 134.0, 132.2, 123.3, 121.9, 119.5, 78.0, 57.5, 56.7, 42.6, 38.0, 31.2, 27.6, 24.5. HRMS (EI-TOF) calc. for  $\text{C}_{23}\text{H}_{27}\text{N}_3\text{O}_4$  ( $\text{M}^+$ ): 409.2002, found: 409.2008.

### 3,3-Dimethoxy-*N*-(2-(pyridin-2-yl)propan-2-yl)propanamide **19**

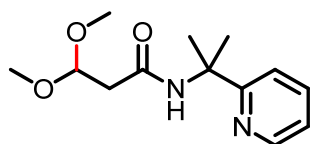

The title compound **19** was prepared according to the general procedure and was purified by flash chromatography (ethyl acetate). **19** was obtained as a light yellow liquid (40.8 mg, 81%).  $R_f = 0.35$  (ethyl acetate).  $^1\text{H}$  NMR (400 MHz,  $\text{CDCl}_3$ )  $\delta$  8.51 (d,  $J = 4.7$  Hz, 1H), 8.00 (s, 1H), 7.69 (m, 1H), 7.39 (d,  $J = 8.0$  Hz, 1H), 7.17 (dd,  $J = 7.3, 5.0$  Hz, 1H), 4.77 (t,  $J = 5.5$  Hz, 1H), 3.41 (s, 6H), 2.58 (d,  $J = 5.5$  Hz, 2H), 1.74 (s, 6H).  $^{13}\text{C}$  NMR (100 MHz,  $\text{CDCl}_3$ )  $\delta$  168.4, 164.6, 147.7, 137.2, 121.9, 119.6, 102.5, 56.8, 54.1, 42.2, 27.7. HRMS (EI-TOF) calc. for  $\text{C}_{13}\text{H}_{20}\text{N}_2\text{O}_3$  ( $\text{M}^+$ ): 252.1474, found: 252.1479.

### (*Z*)-3-Methoxy-*N*-(2-(pyridin-2-yl)propan-2-yl)octadec-9-enamide **20**

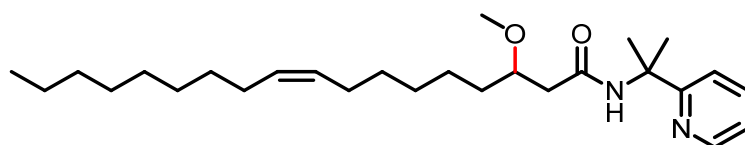

The title compound **20** was prepared according to the general procedure with 3.0 equiv of PhI(OAc)<sub>2</sub> and was purified by flash chromatography (petroleum ether : ethyl acetate = 1 : 1). **20** was obtained as a yellow liquid (63.2 mg, 73%).  $R_f$  = 0.60 (1/ 1 petroleum ether/ ethyl acetate). <sup>1</sup>H NMR (400 MHz, CDCl<sub>3</sub>)  $\delta$  8.51 (d,  $J$  = 4.2 Hz, 1H), 7.92 (s, 1H), 7.69 (t,  $J$  = 7.2 Hz, 1H), 7.40 (d,  $J$  = 8.0 Hz, 1H), 7.17 (m, 1H), 5.34 (m, 2H), 3.62 (m, 1H), 3.40 (s, 3H), 2.43 (dd,  $J$  = 14.6, 7.7 Hz, 1H), 2.35 (dd,  $J$  = 14.6, 4.3 Hz, 1H), 2.01 (m, 4H), 1.75 (s, 3H), 1.74(s, 3H), 1.53 (m, 2H), 1.32 (m, 6H), 1.26 (m, 12H), 0.87 (t,  $J$  = 6.6 Hz, 3H). <sup>13</sup>C NMR (100 MHz, CDCl<sub>3</sub>)  $\delta$  170.6, 164.8, 147.9, 137.0, 129.8, 121.8, 119.5, 78.7, 57.2, 56.7, 42.8, 29.7, 29.5, 27.7, 27.3, 22.8, 14.3. HRMS (EI-TOF) calc. for C<sub>27</sub>H<sub>46</sub>N<sub>2</sub>O<sub>2</sub> ( $M^+$ ): 430.3559, found: 430.3555.

### 3-Methoxy-*N*<sup>1</sup>,*N*<sup>10</sup>-bis(2-(pyridin-2-yl)propan-2-yl)decanediamide **21**

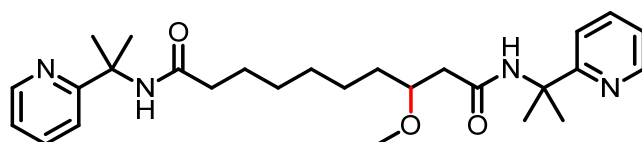

The title compound **21** was prepared according to the general procedure and was purified by flash chromatography (petroleum ether : acetone = 1 : 1). **21** was obtained as a colorless liquid (40.8 mg, 44%).  $R_f$  = 0.58 (1/ 2 petroleum ether/ ethyl acetate). <sup>1</sup>H NMR (400 MHz, CDCl<sub>3</sub>)  $\delta$  8.50 (d,  $J$  = 4.0 Hz, 2H), 7.90 (s, 1H), 7.70 (m, 3H), 7.39 (d,  $J$  = 8.0 Hz, 2H), 7.16 (m, 2H), 3.60 (m, 1H), 3.38 (s, 3H), 2.41 (dd,  $J$  = 14.6, 7.6 Hz, 1H), 2.34 (dd,  $J$  = 14.4, 4.9 Hz, 1H), 2.23 (t,  $J$  = 7.5 Hz, 3H), 1.73 (s, 12H), 1.64 (m, 1H), 1.53 (m, 2H), 1.33 (m, 6H). <sup>13</sup>C NMR (100 MHz, CDCl<sub>3</sub>)  $\delta$  172.5, 170.6, 164.8, 164.7, 147.9, 147.7, 137.2, 137.0, 121.9, 121.8, 119.6, 119.5, 78.6, 57.2, 56.7, 56.4, 42.7, 37.9, 22.8, 29.6, 29.3, 27.7, 25.8. HRMS (EI-TOF) calc. for C<sub>27</sub>H<sub>40</sub>N<sub>4</sub>O<sub>3</sub> ( $M^+$ ): 468.3100, found: 468.3101.

## 2,3-Dimethoxy-*N*-(2-(pyridin-2-yl)propan-2-yl)butanamide **22**

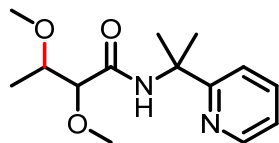

The title compound **22** was prepared according to the general procedure and was purified by flash chromatography (petroleum ether : ethyl acetate = 1 : 1). **22** was obtained as a colorless liquid (26.0 mg, 48%, dr = 2:1).  $R_f$  = 0.41 (1/ 1 petroleum ether/ ethyl acetate).  $^1\text{H}$  NMR (400 MHz,  $\text{CDCl}_3$ )  $\delta$  8.53 (ddd,  $J$  = 4.8, 1.7, 0.9 Hz, 1H), 8.26 (s, 1H), 7.67 (dt,  $J$  = 7.8, 1.8 Hz, 1H), 7.43 (d,  $J$  = 8.1 Hz, 1H), 7.16 (ddd,  $J$  = 7.4, 4.9, 1.0 Hz, 1H), 3.75 (dq,  $J$  = 6.5, 2.8 Hz, 1H), 3.55 (s, 3H), 3.46 (d,  $J$  = 2.8 Hz, 1H), 3.35 (s, 3H), 1.78 (s, 3H), 1.75 (s, 3H), 1.27 (d,  $J$  = 6.4 Hz, 3H).  $^{13}\text{C}$  NMR (100 MHz,  $\text{CDCl}_3$ )  $\delta$  170.0, 164.6, 148.2, 136.9, 121.8, 119.4, 86.5, 77.4, 60.2, 57.6, 56.8, 28.2, 27.5, 15.5. HRMS (EI-TOF) calc. for  $\text{C}_{14}\text{H}_{22}\text{N}_2\text{O}_3$  ( $\text{M}^+$ ): 266.1630, found: 266.1637.

## (*S*)-2-(Benzyloxy)-3-methoxy-*N*-(2-(pyridin-2-yl)propan-2-yl)propanamide **23**

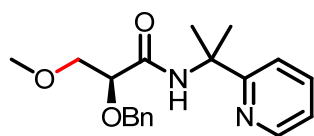

The title compound **23** was prepared according to the general procedure and was purified by flash chromatography (petroleum ether : ethyl acetate = 2 : 1). **23** was obtained as a yellow liquid (50.4 mg, 77%).  $R_f$  = 0.60 (1/ 1 petroleum ether/ ethyl acetate).  $^1\text{H}$  NMR (400 MHz,  $\text{CDCl}_3$ )  $\delta$  8.80 (s, 1H), 8.49 (d,  $J$  = 4.8 Hz, 1H), 7.68 (t,  $J$  = 7.8 Hz, 1H), 7.48 (d,  $J$  = 7.2 Hz, 2H), 7.33 (dt,  $J$  = 14.2, 8.1 Hz, 4H), 7.17 (dd,  $J$  = 7.3, 5.0 Hz, 1H), 4.74 (s, 2H), 4.02 (dd,  $J$  = 5.6, 2.4 Hz, 1H), 3.78 (dd,  $J$  = 10.5, 2.3 Hz, 1H), 3.72 (dd,  $J$  = 10.6, 5.7 Hz, 1H), 3.39 (s, 3H), 1.75 (s, 3H), 1.73 (s, 3H).  $^{13}\text{C}$  NMR (100 MHz,  $\text{CDCl}_3$ )  $\delta$  169.2, 164.5, 147.9, 137.5, 137.0, 128.6, 128.3, 128.1,

121.9, 119.4, 80.5, 73.7, 73.4, 59.4, 56.7, 27.9, 27.4. HRMS (EI-TOF) calc. for  $C_{19}H_{24}N_2O_3$  ( $M^+$ ): 328.1787, found: 328.1781.

**(S)-2,3-Dimethoxy-N-(2-(pyridin-2-yl)propan-2-yl)propanamide **24****

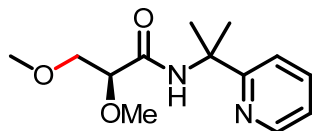

The title compound **24** was prepared according to the general procedure and was purified by flash chromatography (petroleum ether : ethyl acetate = 1 : 2). **24** was obtained as a yellow oil (37.2 mg, 73%).  $R_f$  = 0.45 (1/ 2 petroleum ether/ ethyl acetate).  $^1H$  NMR (400 MHz,  $CDCl_3$ )  $\delta$  8.53 (d,  $J$  = 4.4 Hz, 1H), 8.41 (s, 1H), 7.68 (td,  $J$  = 8.0, 1.5 Hz, 1H), 7.41 (d,  $J$  = 8.1 Hz, 1H), 7.16 (dd,  $J$  = 6.9, 5.3 Hz, 1H), 3.81 – 3.77 (m, 1H), 3.78 – 3.73 (m, 1H), 3.67 (dd,  $J$  = 10.4, 5.3 Hz, 1H), 3.55 (s, 3H), 3.39 (s, 3H), 1.76 (s, 3H), 1.74 (s, 3H).  $^{13}C$  NMR (100 MHz,  $CDCl_3$ )  $\delta$  169.2, 164.4, 148.1, 137.0, 121.9, 119.4, 82.6, 72.8, 59.4, 58.8, 56.7, 28.0, 27.5. HRMS (EI-TOF) calc. for  $C_{13}H_{20}N_2O_3$  ( $M^+$ ): 252.1474, found: 252.1466.

**3-Methoxy-N-(2-(pyridin-2-yl)propan-2-yl)propanamide **25****

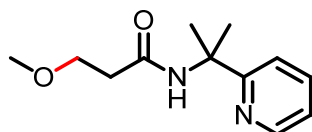

The title compound **25** was prepared according to the general procedure with 1.0 equiv of  $PhI(OAc)_2$  and was purified by flash chromatography (petroleum ether : acetone = 1 : 1). **25** was obtained as a yellow liquid (41.0 mg, 92%).  $R_f$  = 0.49 (ethyl acetate).  $^1H$  NMR (400 MHz,  $CDCl_3$ )  $\delta$  8.51 (d,  $J$  = 4.3 Hz, 1H), 7.97 (s, 1H), 7.69 (t,  $J$  = 7.7 Hz, 1H), 7.40 (d,  $J$  = 8.1 Hz, 1H), 7.17 (m, 1H), 3.69 (t,  $J$  = 6.0 Hz, 2H), 3.40 (s, 3H), 2.51 (t,  $J$  = 6.0 Hz, 2H), 1.74 (s, 6H).  $^{13}C$  NMR (100 MHz,  $CDCl_3$ )  $\delta$  171.0,

165.3, 148.4, 137.6, 122.4, 120.1, 69.6, 59.5, 57.3, 38.8, 28.3. HRMS (EI-TOF) calc. for  $C_{12}H_{18}N_2O_2$  ( $M^+$ ): 222.1368, found: 222.1371.

### 3,3-Dimethoxy-*N*-(2-(pyridin-2-yl)propan-2-yl)propanamide **26**

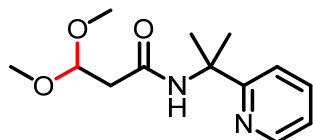

The title compound **26** was prepared according to the general procedure with 3.0 equiv of  $PhI(OAc)_2$  and was purified by flash chromatography (petroleum ether : acetone = 1 : 1). **26** was obtained as a yellow liquid (35.1 mg, 70%).  $R_f$  = 0.46 (ethyl acetate).  $^1H$  NMR (400 MHz,  $CDCl_3$ )  $\delta$  8.51 (d,  $J$  = 4.7 Hz, 1H), 8.00 (s, 1H), 7.69 (m, 1H), 7.39 (d,  $J$  = 8.0 Hz, 1H), 7.17 (dd,  $J$  = 7.3, 5.0 Hz, 1H), 4.77 (t,  $J$  = 5.5 Hz, 1H), 3.41 (s, 6H), 2.58 (d,  $J$  = 5.5 Hz, 2H), 1.74 (s, 6H).  $^{13}C$  NMR (100 MHz,  $CDCl_3$ )  $\delta$  168.4, 164.6, 147.7, 137.2, 121.9, 119.6, 102.5, 56.8, 54.1, 42.2, 27.7. HRMS (EI-TOF) calc. for  $C_{13}H_{20}N_2O_3$  ( $M^+$ ): 252.1474, found: 252.1479.

### 3-Methoxy-2-(methoxymethyl)-*N*-(2-(pyridin-2-yl)propan-2-yl)propanamide **27**

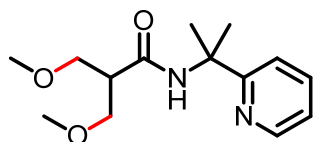

The title compound **27** was prepared according to the general procedure with 2.0 equiv of  $PhI(OAc)_2$  and was purified by flash chromatography (ethyl acetate). **27** was obtained as a colorless liquid (39.9 mg, 75%).  $R_f$  = 0.34 (1/ 2 petroleum ether/ ethyl acetate).  $^1H$  NMR (400 MHz,  $CDCl_3$ )  $\delta$  8.51 (d,  $J$  = 4.2 Hz, 1H), 8.09 (s, 1H), 7.67 (t,  $J$  = 7.7 Hz, 1H), 7.39 (d,  $J$  = 8.0 Hz, 1H), 7.16 (m, 1H), 3.61 (m, 4H), 3.38 (s, 6H), 2.76 (m, 1H), 1.73 (s, 6H).  $^{13}C$  NMR (100 MHz,  $CDCl_3$ )  $\delta$  171.4, 164.8, 148.0, 136.9,



121.8, 119.5, 71.2, 59.1, 57.0, 48.1, 27.8. HRMS (EI-TOF) calc. for C<sub>14</sub>H<sub>22</sub>N<sub>2</sub>O<sub>3</sub> (M<sup>+</sup>): 266.1630, found: 266.1629.

### 3-Ethoxy-N-(2-(pyridin-2-yl)propan-2-yl)propanamide **28**

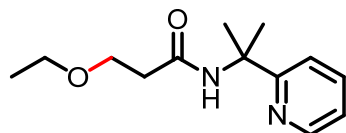

The title compound **28** was prepared according to the general procedure with 1.5 equiv of PhI(OAc)<sub>2</sub> and was purified by flash chromatography (ethyl acetate). **28** was obtained as a colorless liquid (33.3 mg, 71%). *R<sub>f</sub>* = 0.60 (ethyl acetate). <sup>1</sup>H NMR (400 MHz, CDCl<sub>3</sub>) δ 8.50 (d, *J* = 4.3 Hz, 1H), 7.94 (s, 1H), 7.67 (td, *J* = 7.9, 1.8 Hz, 1H), 7.39 (d, *J* = 8.1 Hz, 1H), 7.16 (m, 1H), 3.71 (t, *J* = 6.0 Hz, 2H), 3.54 (q, *J* = 7.0 Hz, 2H), 2.50 (t, *J* = 6.0 Hz, 2H), 1.73 (s, 6H), 1.22 (t, *J* = 7.0 Hz, 3H). <sup>13</sup>C NMR (100 MHz, CDCl<sub>3</sub>) δ 170.8, 164.8, 147.9, 137.0, 121.8, 119.5, 66.9, 66.6, 56.9, 38.4, 27.8, 15.2. HRMS (EI-TOF) calc. for C<sub>13</sub>H<sub>20</sub>N<sub>2</sub>O<sub>2</sub> (M<sup>+</sup>): 236.1525, found: 236.1527.

### 3-(Pentyloxy)-N-(2-(pyridin-2-yl)propan-2-yl)propanamide **29**

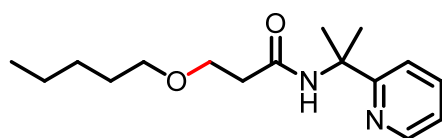

The title compound **29** was prepared according to the general procedure with 1.5 equiv of PhI(OAc)<sub>2</sub> and was purified by flash chromatography (ethyl acetate). **29** was obtained as a light yellow liquid (40.8 mg, 72%). *R<sub>f</sub>* = 0.55 (ethyl acetate). <sup>1</sup>H NMR (400 MHz, CDCl<sub>3</sub>) δ 8.50 (m, 1H), 7.87 (s, 1H), 7.68 (td, *J* = 7.8, 1.8 Hz, 1H), 7.39 (d, *J* = 8.1 Hz, 1H), 7.16 (ddd, *J* = 7.4, 4.9, 0.9 Hz, 1H), 3.70 (t, *J* = 6.0 Hz, 2H), 3.47 (t, *J* = 6.7 Hz, 2H), 2.50 (t, *J* = 6.0 Hz, 2H), 1.73 (s, 6H), 1.59 (m, 2H), 1.31 (td, *J* = 7.1, 3.7 Hz, 4H), 0.86 (t, *J* = 6.8 Hz, 3H). <sup>13</sup>C NMR (100 MHz, CDCl<sub>3</sub>) δ 170.8, 164.9,

147.9, 137.0, 121.8, 119.5, 71.5, 67.2, 56.9, 38.5, 29.5, 28.5, 27.8, 22.7, 14.1. HRMS (EI-TOF) calc. for  $C_{16}H_{26}N_2O_2$  ( $M^+$ ): 278.1994, found:278.2000.

### 3-(Isopentyloxy)-N-(2-(pyridin-2-yl)propan-2-yl)propanamide **30**

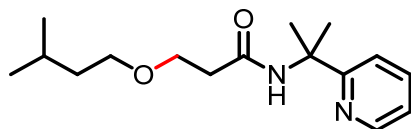

The title compound **30** was prepared according to the general procedure with 1.5 equiv of  $PhI(OAc)_2$  and was purified by flash chromatography (ethyl acetate). **30** was obtained as a light yellow liquid (41.0 mg, 74%, mono: di = 10:1).  $R_f$  = 0.50 (1/1 petroleum ether/ ethyl acetate).  $^1H$  NMR (400 MHz,  $CDCl_3$ )  $\delta$  8.44 (m, 1H), 7.80 (s, 1H), 7.61 (td,  $J$  = 7.8, 1.8 Hz, 1H), 7.33 (d,  $J$  = 8.1 Hz, 1H), 7.09 (ddd,  $J$  = 7.4, 4.9, 0.9 Hz, 1H), 3.64 (t,  $J$  = 6.0 Hz, 2H), 3.44 (t,  $J$  = 6.8 Hz, 2H), 2.43 (t,  $J$  = 6.0 Hz, 2H), 1.67 (s, 6H), 1.61 (m, 1H), 1.43 (m, 2H), 0.82 (d,  $J$  = 6.6 Hz, 6H).  $^{13}C$  NMR (100 MHz,  $CDCl_3$ )  $\delta$  170.7, 164.7, 147.8, 147.8, 136.8, 128.8, 121.7, 119.4, 69.7, 67.1, 56.7, 38.5, 38.4, 27.6, 25.1, 22.6. HRMS (EI-TOF) calc. for  $C_{16}H_{26}N_2O_2$  ( $M^+$ ): 278.1994, found:278.1996.

### 3-(2-Cyclohexylethoxy)-N-(2-(pyridin-2-yl)propan-2-yl)propanamide **31**

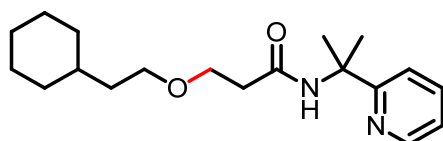

The title compound **31** was prepared according to the general procedure with 1.5 equiv of  $PhI(OAc)_2$  and was purified by flash chromatography (ethyl acetate). **31** was obtained as a light yellow liquid (32.0 mg, 53%).  $R_f$  = 0.65 (ethyl acetate).  $^1H$  NMR (400 MHz,  $CDCl_3$ )  $\delta$  8.52 (d,  $J$  = 4.4 Hz, 1H), 7.88 (s, 1H), 7.68 (t,  $J$  = 7.6 Hz, 1H), 7.39 (d,  $J$  = 7.6 Hz, 1H), 7.16 (dd,  $J$  = 6.4, 4.8 Hz, 1H), 3.70 (t,  $J$  = 5.6 Hz, 2H), 3.51 (t,  $J$  = 6.8 Hz, 2H), 1.74 (s, 6H), 1.70 – 1.63 (m, 6H), 1.49 (dd,  $J$  = 13.6, 6.8 Hz, 2H),

1.38 – 1.33 (m, 1H), 1.19 – 1.14 (m, 2H), 0.93 – 0.85 (m, 2H).  $^{13}\text{C}$  NMR (100 MHz,  $\text{CDCl}_3$ )  $\delta$  170.8, 164.9, 147.9, 137.0, 121.8, 119.5, 69.4, 67.2, 56.9, 38.5, 37.3, 34.7, 33.5, 27.8, 26.7, 26.4. HRMS (EI-TOF) calc. for  $\text{C}_{19}\text{H}_{30}\text{N}_2\text{O}_2$  ( $\text{M}^+$ ): 318.2307, found: 318.2305.

***N*-(2-(Pyridin-2-yl)propan-2-yl)-3-(2,2,2-trifluoroethoxy)propanamide **32****

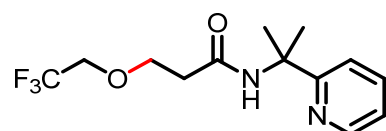

The title compound **32** was prepared according to the general procedure with 1.5 equiv of  $\text{PhI}(\text{OAc})_2$  and was purified by flash chromatography (ethyl acetate). **32** was obtained as a light yellow liquid (37.5 mg, 65%).  $R_f$  = 0.70 (ethyl acetate).  $^1\text{H}$  NMR (400 MHz,  $\text{CDCl}_3$ )  $\delta$  8.51 – 8.49 (m, 1H), 7.80 (s, 1H), 7.70 (dt,  $J$  = 7.6, 1.6 Hz, 1H), 7.39 (d,  $J$  = 8.0 Hz, 1H), 7.19 – 7.16 (m, 1H), 3.93 (t,  $J$  = 6.0 Hz, 2H), 3.88 (t,  $J$  = 8.8 Hz, 2H), 2.55 (d,  $J$  = 5.6 Hz, 2H), 1.74 (s, 6H).  $^{13}\text{C}$  NMR (100 MHz,  $\text{CDCl}_3$ )  $\delta$  169.6, 164.5, 147.8, 137.2, 124.1 (q,  $J_{\text{C-F}}$  = 279.9 Hz), 122.0, 119.5, 69.2, 69.0, 68.8 (q,  $J_{\text{C-F}}$  = 34.1 Hz), 56.9, 38.3, 27.7. HRMS (EI-TOF) calc. for  $\text{C}_{13}\text{H}_{17}\text{F}_3\text{N}_2\text{O}_2$  ( $\text{M}^+$ ): 290.1242, found: 290.1236.

***N*-(2-(pyridin-2-yl)propan-2-yl)-3-(benzyloxy)propanamide **33****

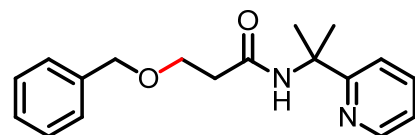

The title compound **33** was prepared according to the general procedure with 1.5 equiv of  $\text{PhI}(\text{OAc})_2$  and was purified by flash chromatography (ethyl acetate). **33** was obtained as a light yellow liquid (45.2 mg, 75%).  $R_f$  = 0.69 (ethyl acetate).  $^1\text{H}$  NMR (400 MHz,  $\text{CDCl}_3$ )  $\delta$  8.43 (m, 1H), 7.91 (s, 1H), 7.65 (td,  $J$  = 7.8, 1.8 Hz, 1H), 7.38 (d,

$J = 8.1$  Hz, 1H), 7.30 (m, 5H), 7.14 (ddd,  $J = 7.4, 4.9, 0.9$  Hz, 1H), 4.57 (s, 2H), 3.79 (t,  $J = 6.0$  Hz, 2H), 2.55 (t,  $J = 6.0$  Hz, 2H), 1.73 (s, 6H).  $^{13}\text{C}$  NMR (100 MHz,  $\text{CDCl}_3$ )  $\delta$  170.6, 164.7, 147.9, 138.2, 137.0, 128.5, 127.8, 127.8, 121.8, 119.5, 73.4, 66.9, 56.9, 38.5, 27.7. HRMS (EI-TOF) calc. for  $\text{C}_{18}\text{H}_{22}\text{N}_2\text{O}_2$  ( $\text{M}^+$ ): 298.1681, found: 298.1685.

**3-((3-Methylbut-2-en-1-yl)oxy)-*N*-(2-(pyridin-2-yl)propan-2-yl)propanamide 34**

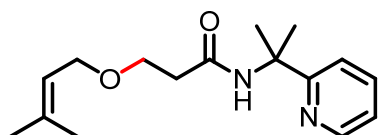

The title compound **34** was prepared according to the general procedure with 1.5 equiv of  $\text{PhI}(\text{OAc})_2$  and was purified by flash chromatography (ethyl acetate). **34** was obtained as a light yellow liquid (35.9 mg, 65%).  $R_f = 0.57$  (ethyl acetate).  $^1\text{H}$  NMR (400 MHz,  $\text{CDCl}_3$ )  $\delta$  8.50 (m, 1H), 7.90 (s, 1H), 7.67 (td,  $J = 7.9, 1.7$  Hz, 1H), 7.39 (d,  $J = 8.1$  Hz, 1H), 7.16 (dd,  $J = 7.2, 5.0$  Hz, 1H), 5.36 (t,  $J = 6.9$  Hz, 1H), 4.02 (d,  $J = 6.9$  Hz, 2H), 3.71 (t,  $J = 6.0$  Hz, 2H), 2.51 (t,  $J = 6.0$  Hz, 2H), 1.73 (s, 9H), 1.66 (s, 3H).  $^{13}\text{C}$  NMR (100 MHz,  $\text{CDCl}_3$ )  $\delta$  170.7, 164.8, 147.9, 137.2, 137.0, 121.8, 121.0, 119.5, 67.7, 66.4, 56.9, 38.5, 27.8, 25.9, 18.2. HRMS (EI-TOF) calc. for  $\text{C}_{16}\text{H}_{24}\text{N}_2\text{O}_2$  ( $\text{M}^+$ ): 276.1838, found: 276.1829.

**(*Z*)-3-(Octadec-9-en-1-yloxy)-*N*-(2-(pyridin-2-yl)propan-2-yl)propanamide 35**

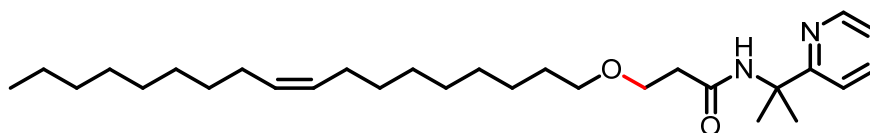

The title compound **35** was prepared according to the general procedure with 1.5 equiv of  $\text{PhI}(\text{OAc})_2$  and was purified by flash chromatography (petroleum ether : ethyl acetate = 1 : 1). **35** was obtained as a light yellow liquid (65.6 mg, 71%).  $R_f = 0.50$  (1/1 petroleum ether/ ethyl acetate).  $^1\text{H}$  NMR (400 MHz,  $\text{CDCl}_3$ )  $\delta$  8.50 (d,  $J =$

4.7 Hz, 1H), 7.88 (s, 1H), 7.67 (td,  $J = 7.9, 1.6$  Hz, 1H), 7.39 (d,  $J = 8.1$  Hz, 1H), 7.15 (dd,  $J = 7.3, 5.0$  Hz, 1H), 5.33 (m, 2H), 3.70 (t,  $J = 5.9$  Hz, 2H), 3.46 (t,  $J = 6.7$  Hz, 2H), 2.49 (t,  $J = 5.9$  Hz, 2H), 1.99 (m, 4H), 1.73 (s, 6H), 1.58 (m, 2H), 1.27 (m, 22H), 0.86 (t,  $J = 6.7$  Hz, 3H).  $^{13}\text{C}$  NMR (100 MHz,  $\text{CDCl}_3$ )  $\delta$  170.8, 164.9, 147.91, 136.9, 130.1, 129.9, 121.8, 119.5, 71.5, 67.1, 56.9, 38.5, 32.0, 29.9, 29.8, 29.8, 29.7, 29.6, 29.6, 29.4, 29.4, 27.8, 27.3, 27.3, 26.3, 22.8, 14.2. HRMS (EI-TOF) calc. for  $\text{C}_{29}\text{H}_{50}\text{N}_2\text{O}_2$  ( $\text{M}^+$ ): 458.3872, found: 458.3874.

### 3-((3-Methylbutan-2-yl)oxy)-N-(2-(pyridin-2-yl)propan-2-yl)propanamide **36**

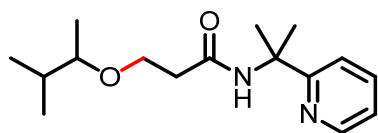

The title compound **36** was prepared according to the general procedure with 1.5 equiv of  $\text{PhI}(\text{OAc})_2$  and was purified by flash chromatography (ethyl acetate). **36** was obtained as a light yellow liquid (30.6 mg, 55%).  $R_f = 0.61$  (ethyl acetate).  $^1\text{H}$  NMR (400 MHz,  $\text{CDCl}_3$ )  $\delta$  8.51 (d,  $J = 6.8$  Hz, 1H), 7.82 (s, 1H), 7.68 (dt,  $J = 8.0, 2.0$  Hz, 1H), 7.40 (d,  $J = 8.0$  Hz, 1H), 7.17 – 7.15 (m, 1H), 3.81 – 3.76 (m, 1H), 3.66 – 3.61 (m, 1H), 3.53 – 3.48 (m, 1H), 2.50 – 2.46 (m, 2H), 1.73 (d,  $J = 2.0$  Hz, 6H), 1.53 – 1.47 (m, 1H), 1.14 (d,  $J = 6.0$  Hz, 3H), 0.87 (dd,  $J = 11.2, 6.4$  Hz, 6H).  $^{13}\text{C}$  NMR (100 MHz,  $\text{CDCl}_3$ )  $\delta$  170.9, 164.9, 148.0, 137.0, 121.8, 119.5, 74.2, 64.6, 56.9, 46.3, 38.8, 27.8, 27.8, 24.8, 23.1, 22.9, 19.9. HRMS (EI-TOF) calc. for  $\text{C}_{16}\text{H}_{26}\text{N}_2\text{O}_2$  ( $\text{M}^+$ ): 278.1994, found: 278.2000.

### 3,3-Di( $d_3$ -methoxyl)-N-(2-(pyridin-2-yl)propan-2-yl)propanamide **37**

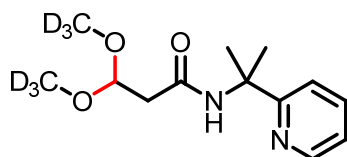

The title compound **37** was prepared according to the general procedure with 1.5 equiv of  $\text{PhI}(\text{OAc})_2$  and was purified by flash chromatography (ethyl acetate). **37** was obtained as a light yellow liquid (40.1 mg, 77%).  $R_f = 0.35$  (ethyl acetate).  $^1\text{H}$  NMR (400 MHz,  $\text{CDCl}_3$ )  $\delta$  8.51 (d,  $J = 4.8$  Hz, 1H), 7.97 (s, 1H), 7.69 (td,  $J = 7.8, 1.8$  Hz, 1H), 7.39 (d,  $J = 8.1$  Hz, 1H), 7.17 (dd,  $J = 7.4, 4.9$  Hz, 1H), 4.76 (t,  $J = 5.5$  Hz, 1H), 2.58 (d,  $J = 5.5$  Hz, 2H), 1.74 (s, 6H).  $^{13}\text{C}$  NMR (100 MHz,  $\text{CDCl}_3$ )  $\delta$  168.4, 164.7, 147.8, 137.1, 121.9, 119.5, 102.4, 56.9, 53.4 (q,  $J = 21.3$  Hz), 42.4, 27.7. HRMS (EI-TOF) calc. for  $\text{C}_{13}\text{H}_{14}\text{D}_6\text{N}_2\text{O}_3$  ( $\text{M}^+$ ): 258.1851, found: 258.1854.

### 3-Ethoxy-*N*-(2-(pyridin-2-yl)propan-2-yl)butanamide **38**

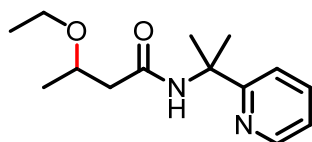

The title compound **38** was prepared according to the general procedure with 3.0 equiv of  $\text{PhI}(\text{OAc})_2$  and was purified by flash chromatography (petroleum ether: ethyl acetate = 1:2). **38** was obtained as a colorless liquid (27.5 mg, 55%).  $R_f = 0.33$  (1/ 2 petroleum ether/ ethyl acetate).  $^1\text{H}$  NMR (400 MHz,  $\text{CDCl}_3$ )  $\delta$  8.51 (d,  $J = 4.1$  Hz, 1H), 7.90 (s, 1H), 7.68 (t,  $J = 7.7$  Hz, 1H), 7.40 (d,  $J = 8.0$  Hz, 1H), 7.16 (m, 1H), 3.85 (m, 1H), 3.62 (m, 1H), 3.49 (m, 1H), 2.45 (dd,  $J = 14.6, 7.8$  Hz, 1H), 2.33 (dd,  $J = 14.5, 4.2$  Hz, 1H), 1.74 (s, 6H), 1.21 (m, 6H).  $^{13}\text{C}$  NMR (100 MHz,  $\text{CDCl}_3$ )  $\delta$  170.5, 164.8, 147.9, 137.0, 121.8, 119.5, 72.8, 64.2, 56.8, 45.4, 27.8, 27.7, 19.9, 15.7. HRMS (EI-TOF) calc. for  $\text{C}_{14}\text{H}_{22}\text{N}_2\text{O}_2$  ( $\text{M}^+$ ): 250.1681, found: 250.1685.

### 3-Isopropoxy-*N*-(2-(pyridin-2-yl)propan-2-yl)butanamide **39**

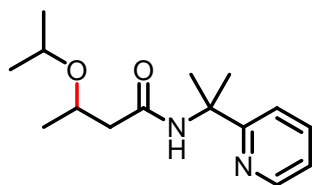

The title compound **39** was prepared according to the general procedure with 3.0 equiv of  $\text{PhI}(\text{OAc})_2$  and was purified by flash chromatography (petroleum ether: ethyl acetate = 1:2). **39** was obtained as a colorless liquid (10.0 mg, 19%).  $R_f$  = 0.33 (1/ 2 petroleum ether/ ethyl acetate).  $^1\text{H}$  NMR (400 MHz,  $\text{CDCl}_3$ )  $\delta$  8.51 (d,  $J$  = 4.2 Hz, 1H), 7.86 (s, 1H), 7.68 (t,  $J$  = 7.7 Hz, 1H), 7.40 (d,  $J$  = 8.0 Hz, 1H), 7.16 (m, 1H), 3.96 (m, 1H), 3.73 (m, 1H), 2.40 (dd,  $J$  = 14.2, 7.5 Hz, 1H), 2.33 (dd,  $J$  = 14.3, 4.3 Hz, 1H), 1.75 (s, 3H), 1.74 (s, 3H), 1.20 (d,  $J$  = 6.2 Hz, 3H), 1.17 (d,  $J$  = 6.1 Hz, 3H), 1.13 (d,  $J$  = 6.1 Hz, 3H).  $^{13}\text{C}$  NMR (100 MHz,  $\text{CDCl}_3$ )  $\delta$  170.5, 164.8, 148.0, 136.9, 121.8, 119.6, 70.0, 69.5, 56.9, 46.0, 27.8, 27.7, 23.3, 22.5, 20.8. HRMS (EI-TOF) calc. for  $\text{C}_{15}\text{H}_{24}\text{N}_2\text{O}_2$  ( $\text{M}^+$ ): 264.1838, found: 264.1830.

### General Procedure for the Alkoxylation of $\text{C}(\text{sp}^2)\text{-H}$ bonds:

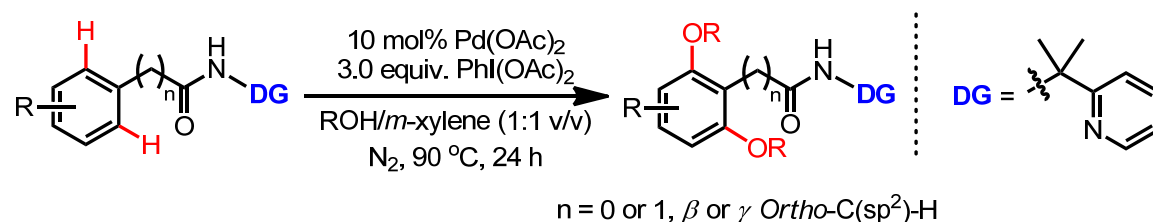

A mixture of substrate (0.2 mmol),  $\text{Pd}(\text{OAc})_2$  (4.5 mg, 10 mmol%),  $\text{PhI}(\text{OAc})_2$  (194 mg, 0.6 mmol), alcohol (1.0 mL) and *m*-xylene (1.0 mL) in a 50 mL Schlenk tube (purged with  $\text{N}_2$ ) was heated at 90 °C for 24 hours. The reaction mixture was cooled to RT, and concentrated *in vacuo*. The resulting residue was purified by flash chromatography to give the desired product.

### **2,6-Dimethoxy-*N*-(2-(pyridin-2-yl)propan-2-yl)benzamide **40****

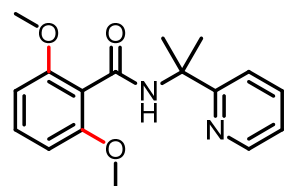

The title compound **40** was prepared according to the general procedure and was purified by flash chromatography (petroleum ether : ethyl acetate = 1 : 2). **40** was obtained as a yellow solid (47.0 mg, 78%).  $R_f$  = 0.50 (1/ 2 petroleum ether/ ethyl acetate).  $^1\text{H}$  NMR (400 MHz,  $\text{CDCl}_3$ )  $\delta$  8.48 (d,  $J$  = 4.3 Hz, 1H), 7.70 (t,  $J$  = 7.6 Hz, 1H), 7.57 (d,  $J$  = 8.1 Hz, 1H), 7.49 (s, 1H), 7.26 (t,  $J$  = 8.4 Hz, 1H), 7.15 (dd,  $J$  = 6.6, 5.3 Hz, 1H), 6.57 (d,  $J$  = 8.4 Hz, 2H), 3.82 (s, 6H), 1.87 (s, 6H).  $^{13}\text{C}$  NMR (100 MHz,  $\text{CDCl}_3$ )  $\delta$  165.2, 164.8, 157.6, 147.8, 136.9, 130.2, 121.7, 119.7, 117.6, 104.2, 57.7, 56.2, 28.0. HRMS (EI-TOF) calc. for  $\text{C}_{17}\text{H}_{20}\text{N}_2\text{O}_3$  ( $\text{M}^+$ ): 300.1474, found: 300.1472.

**2,6-Dimethoxy-4-methyl-N-(2-(pyridin-2-yl)propan-2-yl)benzamide 41**

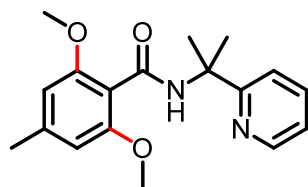

The title compound **41** was prepared according to the general procedure and was purified by flash chromatography (petroleum ether : ethyl acetate = 1 : 4). **41** was obtained as a yellow solid (60.2 mg, 95%).  $R_f$  = 0.33 (1/ 1 petroleum ether/ ethyl acetate).  $^1\text{H}$  NMR (400 MHz,  $\text{CDCl}_3$ )  $\delta$  8.47 (d,  $J$  = 4.6 Hz, 1H), 7.68 (t,  $J$  = 7.7 Hz, 1H), 7.56 (d,  $J$  = 8.0 Hz, 1H), 7.45 (s, 1H), 7.14 (t,  $J$  = 6.4 Hz, 1H), 6.37 (s, 2H), 3.79 (s, 6H), 2.35 (s, 3H), 1.85 (s, 6H).  $^{13}\text{C}$  NMR (100 MHz,  $\text{CDCl}_3$ )  $\delta$  165.4, 164.8, 157.4, 147.8, 140.6, 136.9, 121.6, 119.7, 114.8, 104.9, 57.6, 56.1, 28.0, 22.3. HRMS (EI-TOF) calc. for  $\text{C}_{18}\text{H}_{22}\text{N}_2\text{O}_3$  ( $\text{M}^+$ ): 314.1630, found: 314.1631.

**2,4,6-Trimethoxy-N-(2-(pyridin-2-yl)propan-2-yl)benzamide 42**

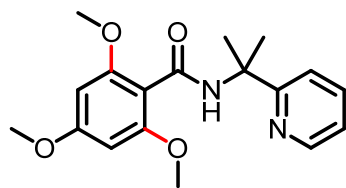



The title compound **42** was prepared according to the general procedure and was purified by flash chromatography (petroleum ether : ethyl acetate = 1 : 2). **42** was obtained as a colorless liquid (65.7 mg, 99%).  $R_f$  = 0.21 (2/ 1 petroleum ether/ ethyl acetate).  $^1\text{H}$  NMR (400 MHz,  $\text{CDCl}_3$ )  $\delta$  8.46 (d,  $J$  = 4.4 Hz, 1H), 7.67 (td,  $J$  = 8.0, 1.6 Hz, 1H), 7.54 (d,  $J$  = 8.1 Hz, 1H), 7.44 (s, 1H), 7.12 (dd,  $J$  = 6.7, 5.2 Hz, 1H), 6.10 (s, 2H), 3.80 (s, 3H), 3.78 (s, 6H), 1.83 (s, 6H).  $^{13}\text{C}$  NMR (100 MHz,  $\text{CDCl}_3$ )  $\delta$  165.1, 164.8, 161.7, 158.5, 147.8, 136.9, 121.6, 119.7, 110.6, 90.6, 57.5, 56.0, 55.5, 27.9. HRMS (EI-TOF) calc. for  $\text{C}_{18}\text{H}_{22}\text{N}_2\text{O}_4$  ( $\text{M}^+$ ): 330.1580, found: 330.1582.

### 2,6-Dimethoxy-4-nitro-*N*-(2-(pyridin-2-yl)propan-2-yl)benzamide **43**

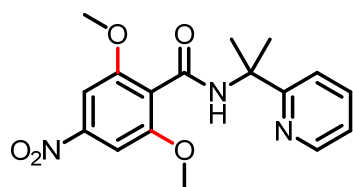

The title compound **43** was prepared according to the general procedure and was purified by flash chromatography (petroleum ether : ethyl acetate = 1 : 1). **43** was obtained as a light yellow solid ( 36.6 mg, 53%).  $R_f$  = 0.49 (1/ 1 petroleum ether/ ethyl acetate).  $^1\text{H}$  NMR (400 MHz,  $\text{CDCl}_3$ )  $\delta$  8.45 (d,  $J$  = 4.7 Hz, 1H), 7.95 (s, 1H), 7.72 (t,  $J$  = 7.8 Hz, 1H), 7.50 (d,  $J$  = 8.1 Hz, 1H), 7.45 (s, 2H), 7.18 (t,  $J$  = 6.4 Hz, 1H), 3.89 (s, 6H), 1.88 (s, 6H).  $^{13}\text{C}$  NMR (100 MHz,  $\text{CDCl}_3$ )  $\delta$  164.2, 163.0, 157.6, 149.4, 147.6, 137.3, 122.8, 122.0, 119.6, 99.9, 57.7, 56.6, 27.7. HRMS (EI-TOF) calc. for  $\text{C}_{17}\text{H}_{19}\text{N}_3\text{O}_5$  ( $\text{M}^+$ ): 345.1325, found: 345.1328.

### 2-Methoxy-*N*-(2-(pyridin-2-yl)propan-2-yl)-5-(trifluoromethyl)benzamide **44**

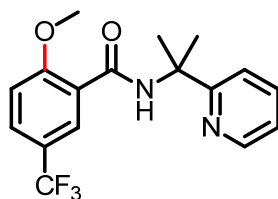

The title compound **44** was prepared according to the general procedure with 1.5 equiv of  $\text{PhI}(\text{OAc})_2$  and was purified by flash chromatography (petroleum ether : ethyl acetate = 3 : 1). **44** was obtained as a white solid (47.8 mg, 71%).  $R_f$  = 0.55 (3/ 1 petroleum ether/ ethyl acetate).  $^1\text{H}$  NMR (400 MHz,  $\text{CDCl}_3$ )  $\delta$  9.77 (s, 1H), 8.58 (d,  $J$  = 4.3 Hz, 1H), 8.50 (s, 1H), 7.74 (t,  $J$  = 7.7 Hz, 1H), 7.66 (d,  $J$  = 8.5 Hz, 1H), 7.47 (d,  $J$  = 8.0 Hz, 1H), 7.21 (m, 1H), 7.05 (d,  $J$  = 8.6 Hz, 1H), 4.08 (s, 3H), 1.87 (s, 6H).  $^{13}\text{C}$  NMR (100 MHz,  $\text{CDCl}_3$ )  $\delta$  164.8, 162.7, 159.9, 147.9, 137.3, 129.7 (q,  $J_{\text{C-F}}$  = 3.8 Hz), 129.4 (q,  $J_{\text{C-F}}$  = 3.6 Hz), 124.1 (q,  $J_{\text{C-F}}$  = 274.3 Hz), 123.6 (q,  $J_{\text{C-F}}$  = 33.5 Hz), 123.3, 122.0, 119.8, 111.6, 57.6, 56.4, 27.4. HRMS (EI-TOF) calc. for  $\text{C}_{17}\text{H}_{17}\text{F}_3\text{N}_2\text{O}_2$  ( $\text{M}^+$ ): 338.1242, found: 388.1250.

**2-(2,6-Dimethoxyphenyl)-N-(2-(pyridin-2-yl)propan-2-yl)acetamide 45**

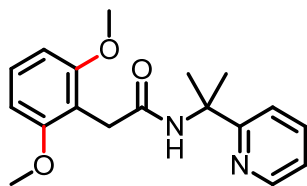

The title compound **45** was prepared according to the general procedure and was purified by flash chromatography (petroleum ether : ether = 1 : 8). **45** was obtained as a colorless liquid (42.9 mg, 76%).  $R_f$  = 0.46 (1/ 1 petroleum ether/ ethyl acetate).  $^1\text{H}$  NMR (400 MHz,  $\text{CDCl}_3$ )  $\delta$  8.40 (d,  $J$  = 4.5 Hz, 1H), 7.62 (t,  $J$  = 8.3 Hz, 1H), 7.58 (s, 1H), 7.33 (d,  $J$  = 8.1 Hz, 1H), 7.22 (t,  $J$  = 8.3 Hz, 1H), 7.12 (dd,  $J$  = 7.6, 5.2 Hz, 1H), 3.84 (s, 6H), 3.66 (s, 2H), 1.68 (s, 6H).  $^{13}\text{C}$  NMR (100 MHz,  $\text{CDCl}_3$ )  $\delta$  170.9, 165.1, 158.6, 147.7, 136.9, 128.3, 119.5, 112.9, 104.0, 56.6, 56.0, 32.6, 27.7. HRMS (EI-TOF) calc. for  $\text{C}_{18}\text{H}_{22}\text{N}_2\text{O}_3$  ( $\text{M}^+$ ): 314.1630, found: 314.1641.

**2-(2,6-Dimethoxy-4-methylphenyl)-N-(2-(pyridin-2-yl)propan-2-yl)acetamide 46**

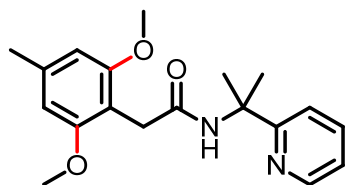

The title compound **46** was prepared according to the general procedure and was purified by flash chromatography (petroleum ether : ether = 1 : 4). **46** was obtained as a yellow solid (51.8 mg, 87%).  $R_f$  = 0.50 (1/ 1 petroleum ether/ ethyl acetate).  $^1\text{H}$  NMR (400 MHz,  $\text{CDCl}_3$ )  $\delta$  8.41 (d,  $J$  = 4.2 Hz, 1H), 7.63 (t,  $J$  = 7.5 Hz, 1H), 7.51 (s, 1H), 7.33 (d,  $J$  = 8.0 Hz, 1H), 7.11 (m, 1H), 6.41 (s, 2H), 3.82 (s, 6H), 3.61 (s, 2H), 2.36 (s, 3H), 1.67 (s, 6H).  $^{13}\text{C}$  NMR (100 MHz,  $\text{CDCl}_3$ )  $\delta$  171.3, 156.2, 160.5, 159.2, 147.8, 136.9, 121.6, 119.5, 105.4, 90.8, 56.6, 55.9, 55.5, 32.3, 27.8. HRMS (EI-TOF) calc. for  $\text{C}_{19}\text{H}_{24}\text{N}_2\text{O}_3$  ( $\text{M}^+$ ): 328.1787, found: 328.1791.

***N*-(2-(Pyridin-2-yl)propan-2-yl)-2-(2,4,6-trimethoxyphenyl)acetamide 47**

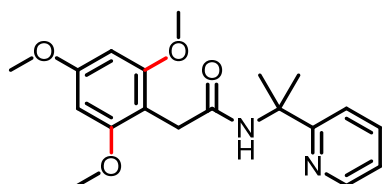

The title compound **47** was prepared according to the general procedure and was purified by flash chromatography (petroleum ether : ether = 1 : 8). **47** was obtained as a light yellow liquid (43.5 mg, 70%).  $R_f$  = 0.50 (1/ 1 petroleum ether/ ethyl acetate).  $^1\text{H}$  NMR (400 MHz,  $\text{CDCl}_3$ )  $\delta$  8.43 (d,  $J$  = 4.2 Hz, 1H), 7.65 (t,  $J$  = 7.7 Hz, 1H), 7.53 (s, 1H), 7.35 (d,  $J$  = 8.1 Hz, 1H), 7.13 (m, 1H), 6.19 (s, 2H), 3.85 (s, 3H), 3.84 (s, 6H), 3.58 (s, 2H), 1.69 (s, 6H).  $^{13}\text{C}$  NMR (100 MHz,  $\text{CDCl}_3$ )  $\delta$  171.3, 165.2, 160.5, 159.2, 147.8, 136.9, 121.6, 119.5, 105.4, 90.8, 56.6, 55.9, 55.5, 32.3, 27.8. HRMS (EI-TOF) calc. for  $\text{C}_{19}\text{H}_{24}\text{N}_2\text{O}_4$  ( $\text{M}^+$ ): 344.1736, found: 344.1732.

**2-(4-Fluoro-2,6-dimethoxyphenyl)-*N*-(2-(pyridin-2-yl)propan-2-yl)acetamide 48**

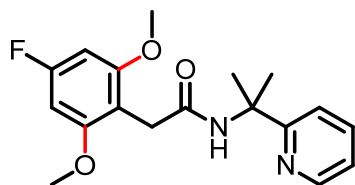

The title compound **48** was prepared according to the general procedure and was purified by flash chromatography (petroleum ether : ethyl acetate = 1 : 2). **48** was obtained as a yellow solid (37.4 mg, 59%).  $R_f$  = 0.41 (1/ 2 petroleum ether/ ethyl acetate).  $^1\text{H}$  NMR (400 MHz,  $\text{CDCl}_3$ )  $\delta$  8.40 (d,  $J$  = 3.8 Hz, 1H), 7.71 (s, 1H), 7.65 (t,  $J$  = 7.5 Hz, 1H), 7.33 (d,  $J$  = 8.1 Hz, 1H), 7.13 (m, 1H), 6.32 (d,  $J$  = 10.8 Hz, 2H), 3.80 (s, 6H), 3.59 (s, 2H), 1.68 (s, 6H).  $^{13}\text{C}$  NMR (100 MHz,  $\text{CDCl}_3$ )  $\delta$  170.7, 165.0, 163.5 (d,  $J_{\text{C-F}}$  = 242.4 Hz), 159.2 (d,  $J_{\text{C-F}}$  = 12.9 Hz), 147.7, 137.0, 121.7, 119.5, 108.4 (d,  $J_{\text{C-F}}$  = 4.0 Hz), 92.1 (d,  $J_{\text{C-F}}$  = 26.6 Hz), 56.5, 56.0, 32.2, 27.6. HRMS (EI-TOF) calc. for  $\text{C}_{18}\text{H}_{21}\text{FN}_2\text{O}_3$  ( $\text{M}^+$ ): 332.1536, found: 332.1535.

#### 2-(4-Chloro-2,6-dimethoxyphenyl)-N-(2-(pyridin-2-yl)propan-2-yl)acetamide **49**

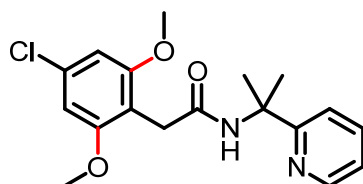

The title compound **49** was prepared according to the general procedure and was purified by flash chromatography (petroleum ether : ethyl acetate = 1 : 2). **49** was obtained as a light yellow solid (36.7 mg, 53%).  $R_f$  = 0.57 (1/ 2 petroleum ether/ ethyl acetate).  $^1\text{H}$  NMR (400 MHz,  $\text{CDCl}_3$ )  $\delta$  8.41 (d,  $J$  = 4.2 Hz, 1H), 7.75 (s, 1H), 7.65 (t,  $J$  = 7.2 Hz, 1H), 7.34 (d,  $J$  = 8.0 Hz, 1H), 7.17 – 7.10 (m, 1H), 6.59 (s, 2H), 3.82 (s, 6H), 3.61 (s, 2H), 1.69 (s, 6H).  $^{13}\text{C}$  NMR (100 MHz,  $\text{CDCl}_3$ )  $\delta$  170.3, 164.9, 158.8, 147.6, 137.0, 133.8, 121.7, 119.5, 111.4, 104.8, 56.5, 56.1, 32.3, 27.6. HRMS (EI-TOF) calc. for  $\text{C}_{18}\text{H}_{21}\text{ClN}_2\text{O}_3$  ( $\text{M}^+$ ): 348.1241, found: 348.1243.

#### 2-(4-Bromo-2,6-dimethoxyphenyl)-N-(2-(pyridin-2-yl)propan-2-yl)acetamide **50**

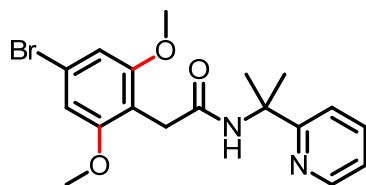

The title compound **50** was prepared according to the general procedure and was purified by flash chromatography (petroleum ether : ethyl acetate = 1 : 2). **50** was obtained as a yellow solid (39.9 mg, 51%).  $R_f$  = 0.40 (1/ 1 petroleum ether/ ethyl acetate).  $^1\text{H}$  NMR (400 MHz,  $\text{CDCl}_3$ )  $\delta$  8.40 (d,  $J$  = 4.1 Hz, 1H), 7.75 (s, 1H), 7.65 (t,  $J$  = 7.0 Hz, 1H), 7.33 (d,  $J$  = 8.0 Hz, 1H), 7.13 (dd,  $J$  = 7.1, 5.1 Hz, 1H), 6.73 (s, 2H), 3.81 (s, 6H), 3.59 (s, 2H), 1.68 (s, 6H).  $^{13}\text{C}$  NMR (100 MHz,  $\text{CDCl}_3$ )  $\delta$  170.2, 165.0, 158.9, 147.6, 137.0, 121.7, 121.4, 119.5, 112.0, 107.8, 56.5, 56.2, 32.4, 27.6. HRMS (EI-TOF) calc. for  $\text{C}_{18}\text{H}_{21}\text{BrN}_2\text{O}_3$  ( $\text{M}^+$ ): 392.0736, found: 392.0742.

#### 2-(2-Methoxy-5-(trifluoromethyl)phenyl)-N-(2-(pyridin-2-yl)propan-2-yl)acetamide **51**

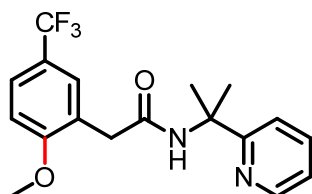

The title compound **51** was prepared according to the general procedure and was purified by flash chromatography (petroleum ether : ethyl acetate = 1 : 2). **51** was obtained as a yellow solid (68.1 mg, 97%).  $R_f$  = 0.64 (1/ 2 petroleum ether/ ethyl acetate).  $^1\text{H}$  NMR (400 MHz,  $\text{CDCl}_3$ )  $\delta$  8.39 (d,  $J$  = 4.3 Hz, 1H), 8.00 (s, 1H), 7.67 (t,  $J$  = 7.6 Hz, 1H), 7.54 (s, 1H), 7.52 (s, 1H), 7.34 (d,  $J$  = 8.0 Hz, 1H), 7.15 (m, 1H), 6.94 (d,  $J$  = 8.5 Hz, 1H), 3.90 (s, 3H), 3.62 (s, 2H), 1.71 (s, 6H).  $^{13}\text{C}$  NMR (100 MHz,  $\text{CDCl}_3$ )  $\delta$  169.6, 164.7, 160.0, 147.6, 137.2, 128.3 (q,  $J_{\text{C-F}}$  = 3.4 Hz), 126.0 (q,  $J_{\text{C-F}}$  = 4.0 Hz), 125.4, 124.5 (q,  $J_{\text{C-F}}$  = 270.8 Hz), 123.0 (q,  $J_{\text{C-F}}$  = 32.7 Hz), 121.9, 119.5, 110.3, 56.6, 55.8, 39.9, 29.8, 27.5. HRMS (EI-TOF) calc. for  $\text{C}_{18}\text{H}_{19}\text{F}_3\text{N}_2\text{O}_2$  ( $\text{M}^+$ ): 352.1399, found: 352.1406.

**2,6-Diethoxy-4-methyl-N-(2-(pyridin-2-yl)propan-2-yl)benzamide 52**

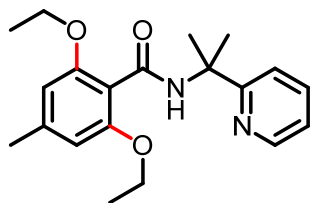

The title compound **52** was prepared according to the general procedure and was purified by flash chromatography (petroleum ether : ethyl acetate = 1 : 1). **52** was obtained as a white solid (55.7 mg, 81%).  $R_f$  = 0.61 (1/ 1 petroleum ether/ ethyl acetate).  $^1\text{H}$  NMR (400 MHz,  $\text{CDCl}_3$ )  $\delta$  8.48 (d,  $J$  = 4.5 Hz, 1H), 7.65 (d,  $J$  = 3.6 Hz, 2H), 7.12 (dd,  $J$  = 8.7, 4.3 Hz, 1H), 7.08 (s, 1H), 6.34 (s, 2H), 4.02 (q,  $J$  = 6.9 Hz, 4H), 2.31 (s, 3H), 1.82 (s, 6H), 1.37 (t,  $J$  = 6.9 Hz, 6H).  $^{13}\text{C}$  NMR (100 MHz,  $\text{CDCl}_3$ )  $\delta$  165.3, 164.9, 156.7, 147.9, 136.6, 119.8, 115.5, 106.1, 64.4, 57.7, 28.1, 22.2, 14.9. HRMS (EI-TOF) calc. for  $\text{C}_{20}\text{H}_{26}\text{N}_2\text{O}_3$  ( $\text{M}^+$ ): 342.1943, found: 342.1945.

**2,6-Bis(isopentyloxy)-4-methyl-N-(2-(pyridin-2-yl)propan-2-yl)benzamide 53**

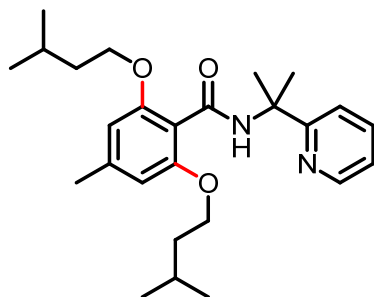

The title compound **53** was prepared according to the general procedure and was purified by flash chromatography (petroleum ether : ethyl acetate = 1 : 1). **53** was obtained as a white solid (78.4 mg, 92%).  $R_f$  = 0.57 (3/ 1 petroleum ether/ ethyl acetate).  $^1\text{H}$  NMR (400 MHz,  $\text{CDCl}_3$ )  $\delta$  8.47 (d,  $J$  = 4.0 Hz, 1H), 7.67 (t,  $J$  = 7.3 Hz, 1H), 7.60 (d,  $J$  = 8.0 Hz, 1H), 7.25 (d,  $J$  = 11.1 Hz, 2H), 7.14 (m, 1H), 6.36 (s, 2H), 3.99 (t,  $J$  = 6.4 Hz, 4H), 2.33 (s, 3H), 1.82 (s, 9H), 1.79 (m, 1H), 1.64 (dd,  $J$  = 13.1, 6.5 Hz, 4H), 0.88 (d,  $J$  = 6.6 Hz, 12H).  $^{13}\text{C}$  NMR (100 MHz,  $\text{CDCl}_3$ )  $\delta$  165.1, 165.0,

157.0, 147.9, 140.4, 136.7, 121.5, 119.8, 115.5, 105.8, 67.0, 57.6, 38.2, 28.0, 24.9, 22.7, 22.3. HRMS (EI-TOF) calc. for  $C_{26}H_{38}N_2O_3$  ( $M^+$ ): 426.2882, found: 426.2879.

**4-Methyl-N-(2-(pyridin-2-yl)propan-2-yl)-2,6-bis(2,2,2-trifluoroethoxy)benzamide **54****

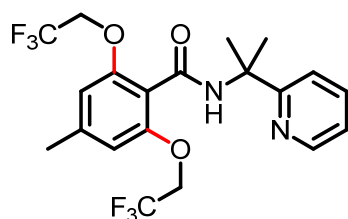

The title compound **54** was prepared according to the general procedure and was purified by flash chromatography (petroleum ether : ethyl acetate = 2 : 1). **54** was obtained as a light yellow solid (42.1 mg, 47%).  $R_f$  = 0.41 (3/ 1 petroleum ether/ ethyl acetate).  $^1H$  NMR (400 MHz,  $CDCl_3$ )  $\delta$  8.46 (d,  $J$  = 4.3 Hz, 1H), 7.68 (t,  $J$  = 7.7 Hz, 1H), 7.53 (d,  $J$  = 8.0 Hz, 1H), 7.46 (s, 1H), 7.14 (m, 1H), 6.48 (s, 2H), 4.37 (q,  $J$  = 8.0 Hz, 4H), 2.34 (s, 3H), 1.81 (s, 6H).  $^{13}C$  NMR (100 MHz,  $CDCl_3$ )  $\delta$  164.3, 163.0, 155.3, 147.8, 141.5, 137.0, 123.3 (q,  $J_{C-F}$  = 277.3 Hz), 121.7, 119.7, 117.7, 109.5, 67.3 (q,  $J_{C-F}$  = 35.3 Hz), 57.8, 27.7, 22.0. HRMS (EI-TOF) calc. for  $C_{20}H_{20}F_6N_2O_3$  ( $M^+$ ): 450.1378, found: 450.1381.

**4-Methyl-N-(2-(pyridin-2-yl)propan-2-yl)-2-(2,2,2-trifluoroethoxy)benzamide **54a****

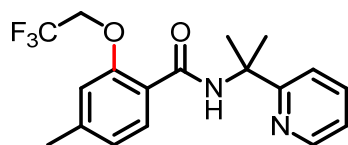

The title compound **54a** was prepared according to the general procedure and was purified by flash chromatography (petroleum ether : ethyl acetate = 2 : 1). **54a** was obtained as a colorless oil (21.7 mg, 26%).  $R_f$  = 0.44 (3/ 1 petroleum ether/ ethyl acetate).  $^1H$  NMR (400 MHz,  $CDCl_3$ )  $\delta$  8.56 (s, 1H), 8.54 (t,  $J$  = 4.0 Hz), 7.99 (d,  $J$

= 8.0 Hz, 1H), 7.65 (t,  $J$  = 7.6 Hz, 1H), 7.45 (d,  $J$  = 8.1 Hz, 1H), 7.14 (m, 1H), 6.97 (d,  $J$  = 7.9 Hz, 1H), 6.72 (s, 1H), 4.53 (q,  $J$  = 8.0 Hz, 2H), 2.39 (s, 3H), 1.82 (s, 6H).  $^{13}\text{C}$  NMR (100 MHz,  $\text{CDCl}_3$ )  $\delta$  165.0, 163.7, 155.0, 148.4, 143.5, 136.7, 132.6, 124.1, 123.4 (q,  $J_{\text{C-F}}$  = 273.2 Hz), 121.6, 119.5, 113.7, 66.8 (q,  $J_{\text{C-F}}$  = 36.4 Hz), 57.6, 29.8, 28.1, 21.7. HRMS (EI-TOF) calc. for  $\text{C}_{18}\text{H}_{19}\text{F}_3\text{N}_2\text{O}_2$  ( $\text{M}^+$ ): 352.1399, found: 352.1395.

### 2,6-Diisopropoxy-4-methyl-*N*-(2-(pyridin-2-yl)propan-2-yl)benzamide **55**

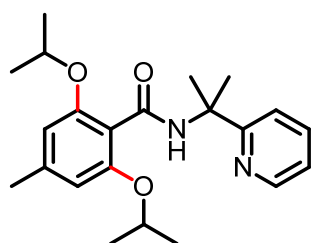

The title compound **55** was prepared according to the general procedure and was purified by flash chromatography (petroleum ether : ethyl acetate = 2 : 1). **55** was obtained as a yellow solid (50.0 mg, 68%).  $R_f$  = 0.47 (2/ 1 petroleum ether/ ethyl acetate).  $^1\text{H}$  NMR (400 MHz,  $\text{CDCl}_3$ )  $\delta$  8.48 (d,  $J$  = 4.4 Hz, 1H), 7.65 (d,  $J$  = 3.7 Hz, 2H), 7.13 (dd,  $J$  = 8.6, 4.3 Hz, 1H), 7.00 (s, 1H), 6.36 (s, 2H), 4.53 (m, 2H), 2.31 (s, 3H), 1.81 (s, 6H), 1.31 (d,  $J$  = 6.0 Hz, 12H).  $^{13}\text{C}$  NMR (100 MHz,  $\text{CDCl}_3$ )  $\delta$  165.4, 165.0, 156.0, 148.0, 140.1, 136.6, 121.5, 119.9, 118.0, 107.9, 71.3, 57.6, 28.1, 22.4, 22.3. HRMS (EI-TOF) calc. for  $\text{C}_{22}\text{H}_{30}\text{N}_2\text{O}_3$  ( $\text{M}^+$ ): 370.2256, found: 370.2265.

### Removal of Directing Group:

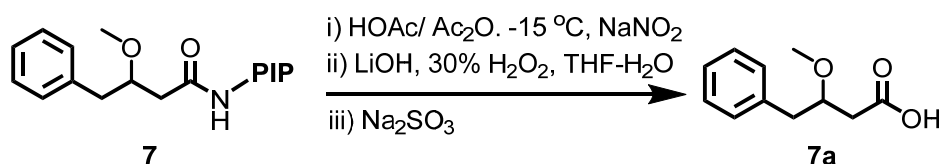

A solution of substrate **7** (118 mg, 0.37 mmol) in a mixture of acetic acid (0.5 mL) and acetic anhydride (2.5 mL) was cooled to -15 °C and 555 mg of granular sodium



nitrite (22 equiv) was added slowly in portions. After being stirred for 37 hours at -15 °C and the mixture poured into a mixture of ice and water. (Caution! The nitrosoamide is unstable and the subsequent work-up should be carried out at 0 °C) The nitrosoamide was extracted with cold ether, and the organic phase was washed with ice water, with an aqueous solution of sodium carbonate (5%), with ice water, and then dried with anhydrous sodium sulfate under ice bath. The solvent was removed under reduce pressure under ice bath. The resident was dissolved in THF (6 mL)/ H<sub>2</sub>O (2 mL) and cooled to -15 °C. Then 30% H<sub>2</sub>O<sub>2</sub> (0.85 mL) was added followed by lithium hydroxide monohydrate (155 mg, 3.7 mmol). The mixture was stirred at -15 °C for 2 hours and at 0 °C for another 2 hours, and then quenched with an aqueous solution of Na<sub>2</sub>SO<sub>3</sub>. The mixture was basified with 1N NaOH and washed with EtOAc. The aqueous phase was acidified with 1M HCl and extracted with ether. The organic layer was washed with brine, dried over anhydrous sodium sulfate and concentrated *in vacuo*. The resulting residue was purified by flash chromatography (petroleum ether : ethyl acetate : acetic acid = 2 : 1 : 0.01). **7a** was obtained as a colorless liquid (62.4 mg, 87%). *R<sub>f</sub>* = 0.55 (1/ 1 petroleum ether/ ethyl acetate). <sup>1</sup>H NMR (400 MHz, CDCl<sub>3</sub>) δ 7.30 (m, 2H), 7.21 (m, 3H), 3.86 (m, 1H), 3.39 (s, 3H), 2.97 (dd, *J* = 13.7, 5.9 Hz, 1H), 2.77 (dd, *J* = 13.7, 6.9 Hz, 1H), 2.49 (d, *J* = 6.3 Hz, 2H). <sup>13</sup>C NMR (100 MHz, CDCl<sub>3</sub>) δ 177.1, 137.7, 129.6, 128.6, 126.7, 78.9, 57.6, 39.9, 38.9. HRMS (EI-TOF) calc. for C<sub>11</sub>H<sub>14</sub>O<sub>3</sub> (M<sup>+</sup>): 194.0943, found:194.0950.

### Mechanistic Investigation

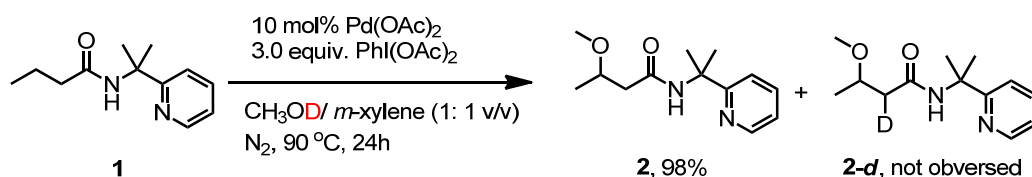

A mixture of substrate **1** (41.2 mg, 0.2 mmol), Pd(OAc)<sub>2</sub> (4.5 mg, 10 mmol%) and PhI(OAc)<sub>2</sub> (194 mg, 0.6 mmol), MeOD (1.0 mL) and *m*-xylene (1.0 mL) in a 50 mL Schlenk tube (purged with N<sub>2</sub>) was heated at 90 °C for 24 hours. The reaction mixture

was cooled to RT, and concentrated *in vacuo*. The resulting residue was purified by flash chromatography (petroleum ether : ethyl acetate = 1 : 2). **2** was obtained as a colorless liquid (46.3 mg, 98%). **2-d** was not observed.

## Supporting Information

### NMR Spectra

# **Pd(II)-Catalyzed Alkoxylation of Unactivated C(sp<sup>3</sup>)–H and C(sp<sup>2</sup>)–H Bonds Using a Removable Directing Group: Efficient Synthesis of Alkyl Ethers**

Fa-Jie Chen,<sup>a</sup> Sheng Zhao,<sup>a</sup> Fang Hu,<sup>b</sup> Kai Chen,<sup>a</sup> Qi Zhang,<sup>a</sup> Shuoqing Zhang,<sup>a</sup>  
and Bing-Feng Shi<sup>\*,a,b</sup>

<sup>a</sup>Department of Chemistry, Zhejiang University, Hangzhou 310027, China

<sup>b</sup>State Key Laboratory of Bioorganic and Natural Products Chemistry, Shanghai Institute of Organic  
Chemistry, Chinese Academy of Sciences, Shanghai 200032, China

\*To whom correspondence should be addressed. Email: [bfshi@zju.edu.cn](mailto:bfshi@zju.edu.cn)

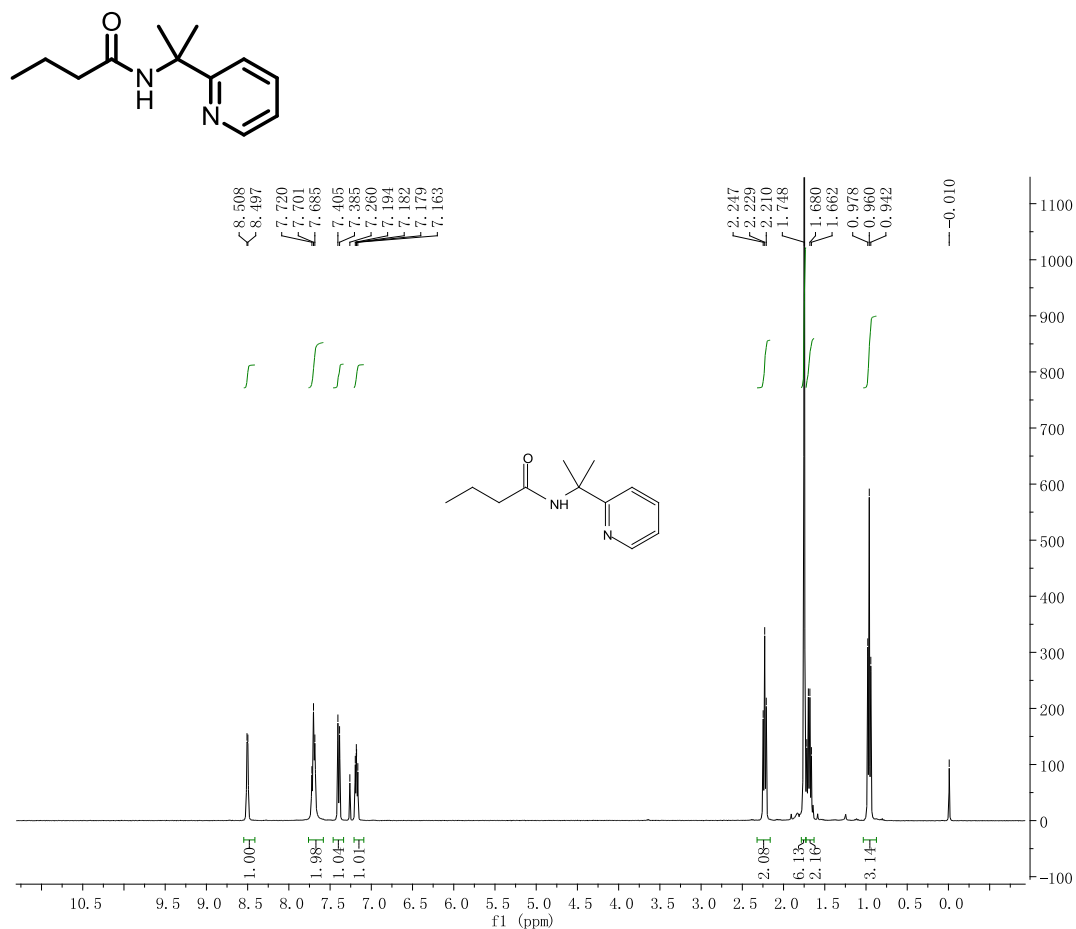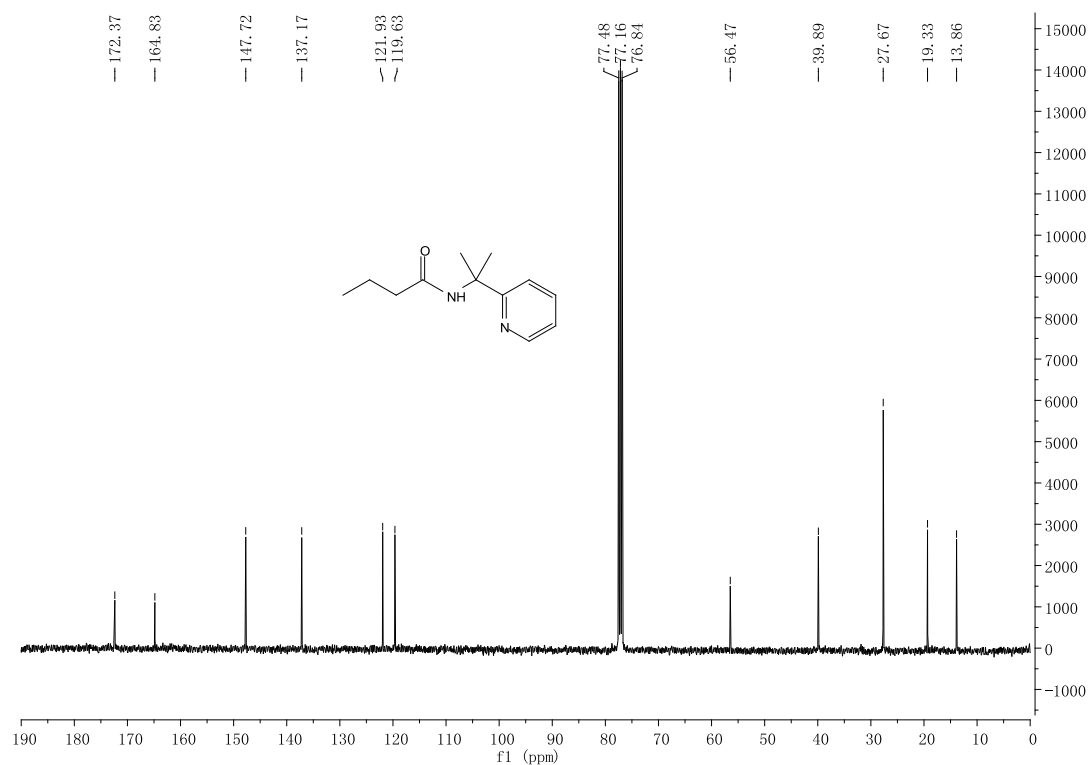

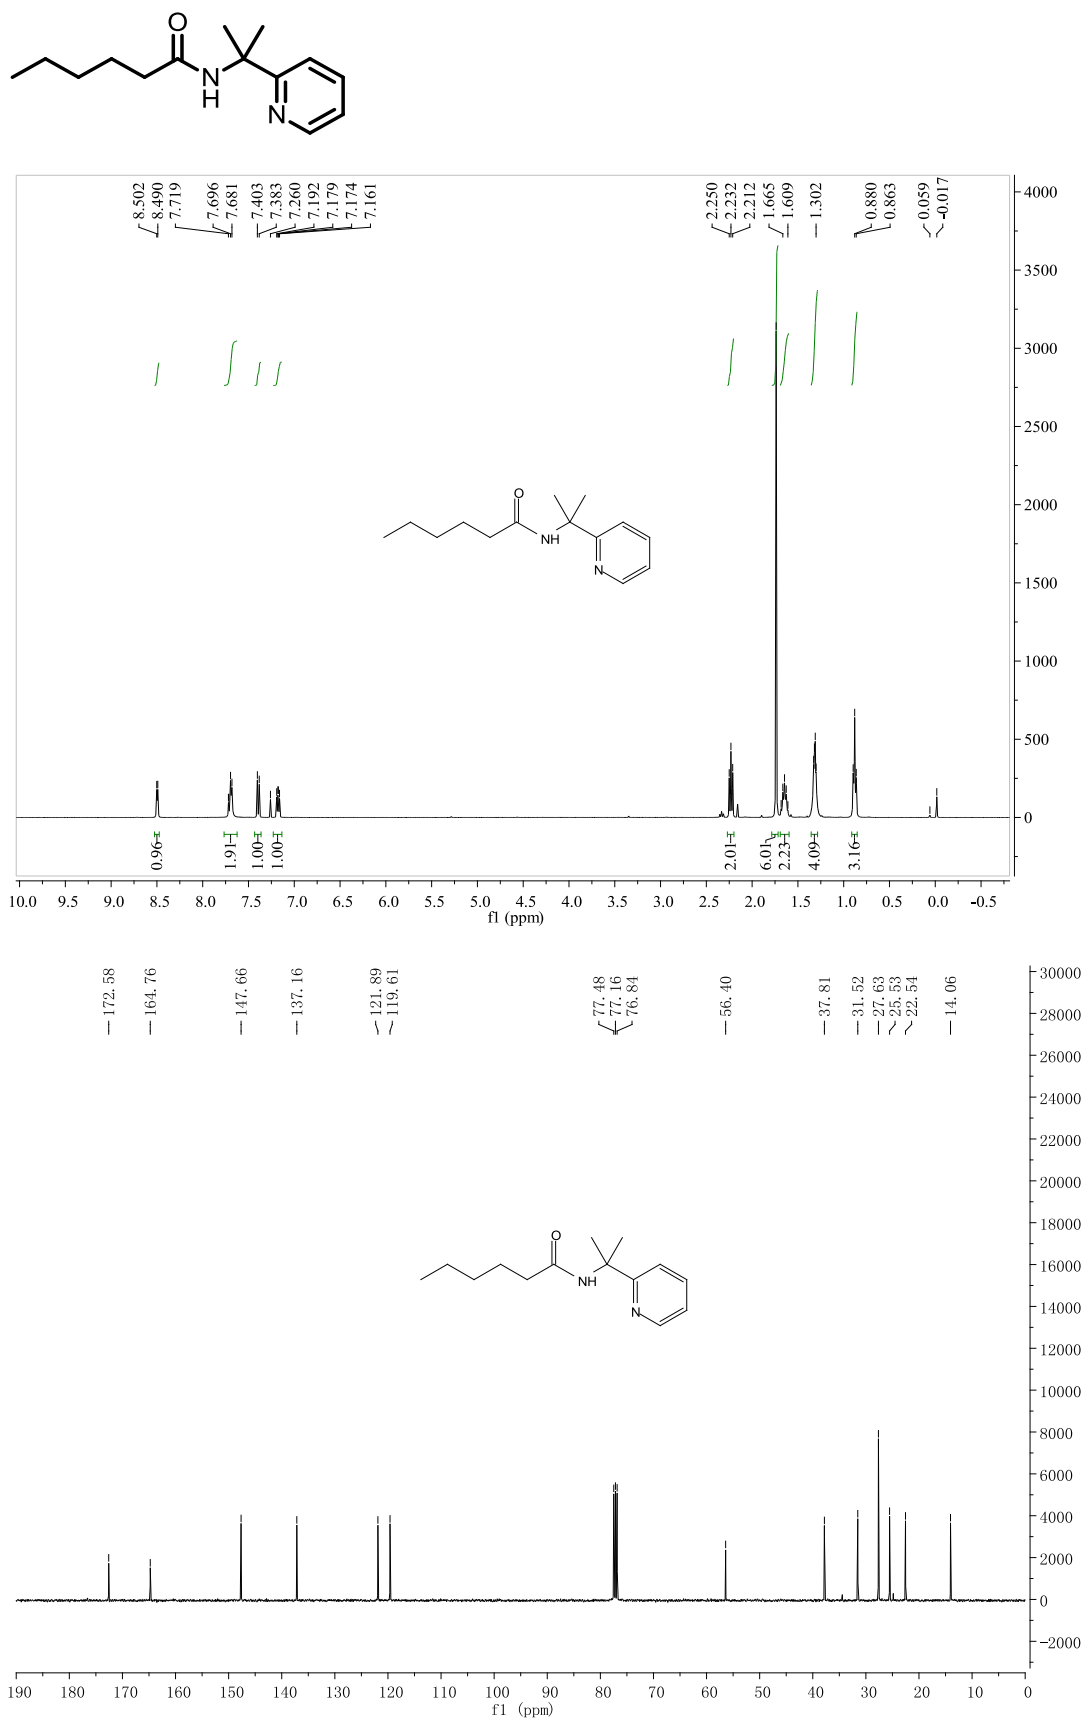

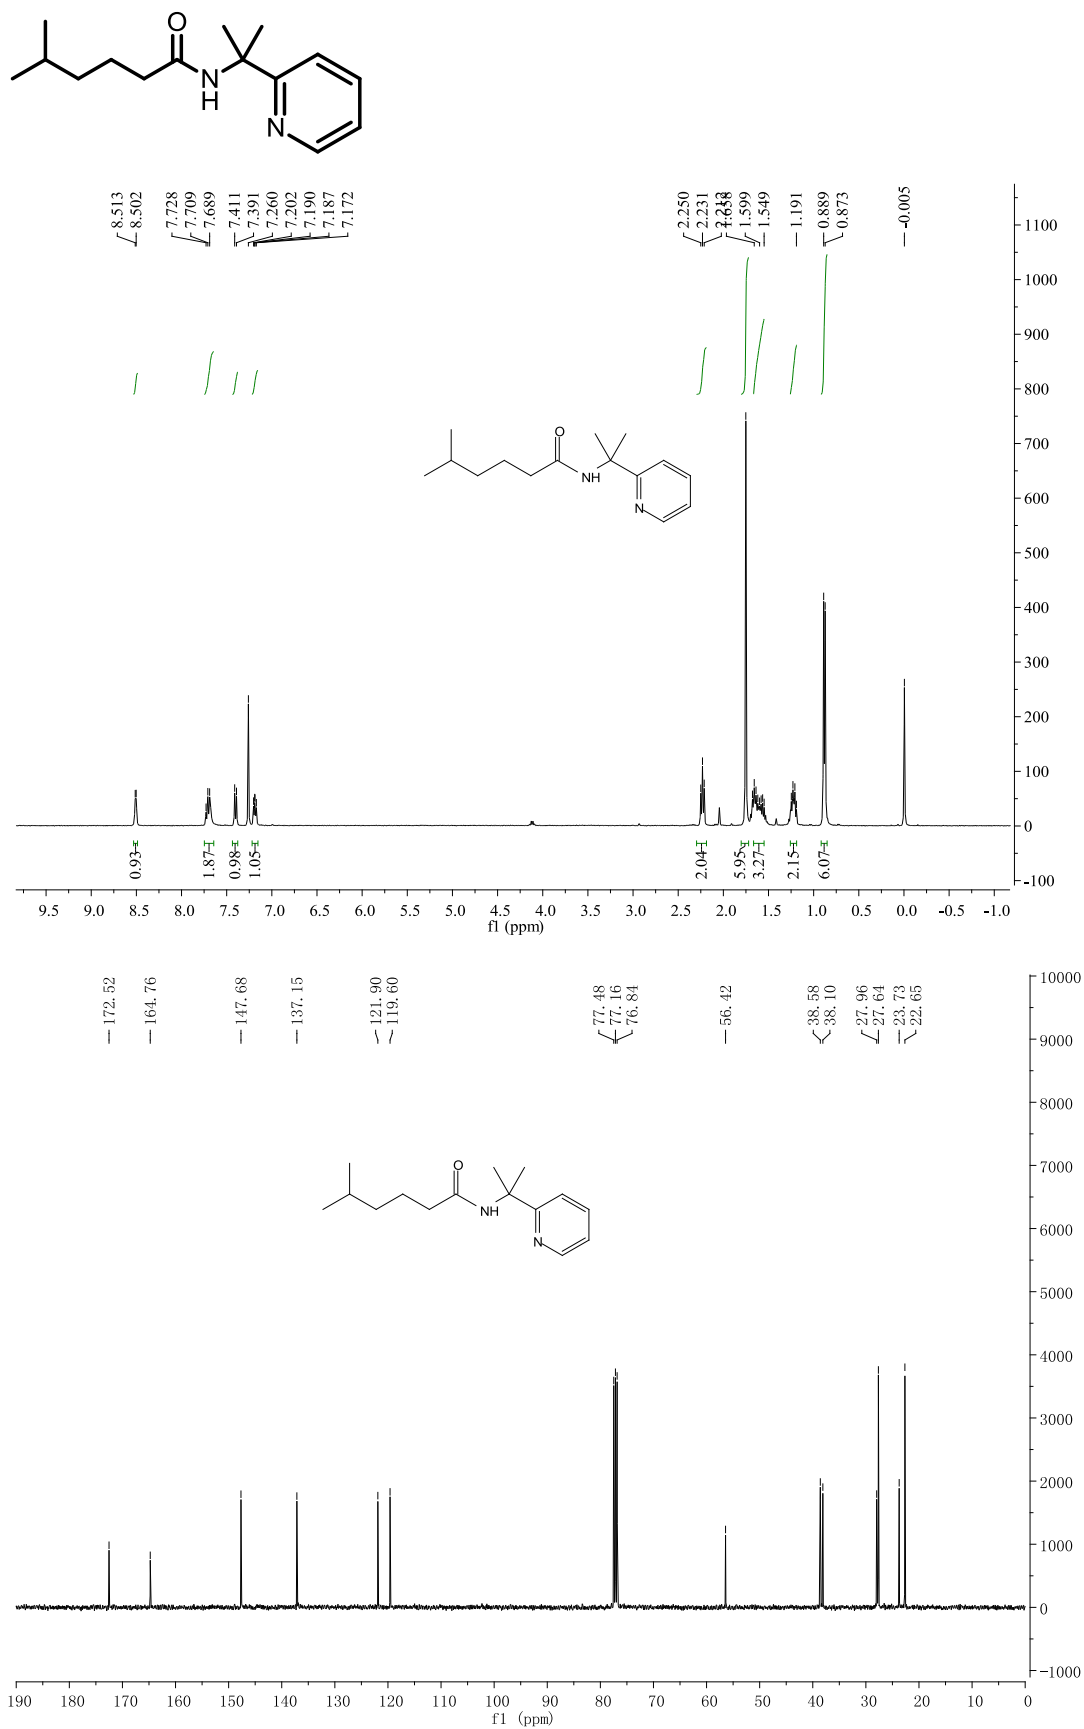

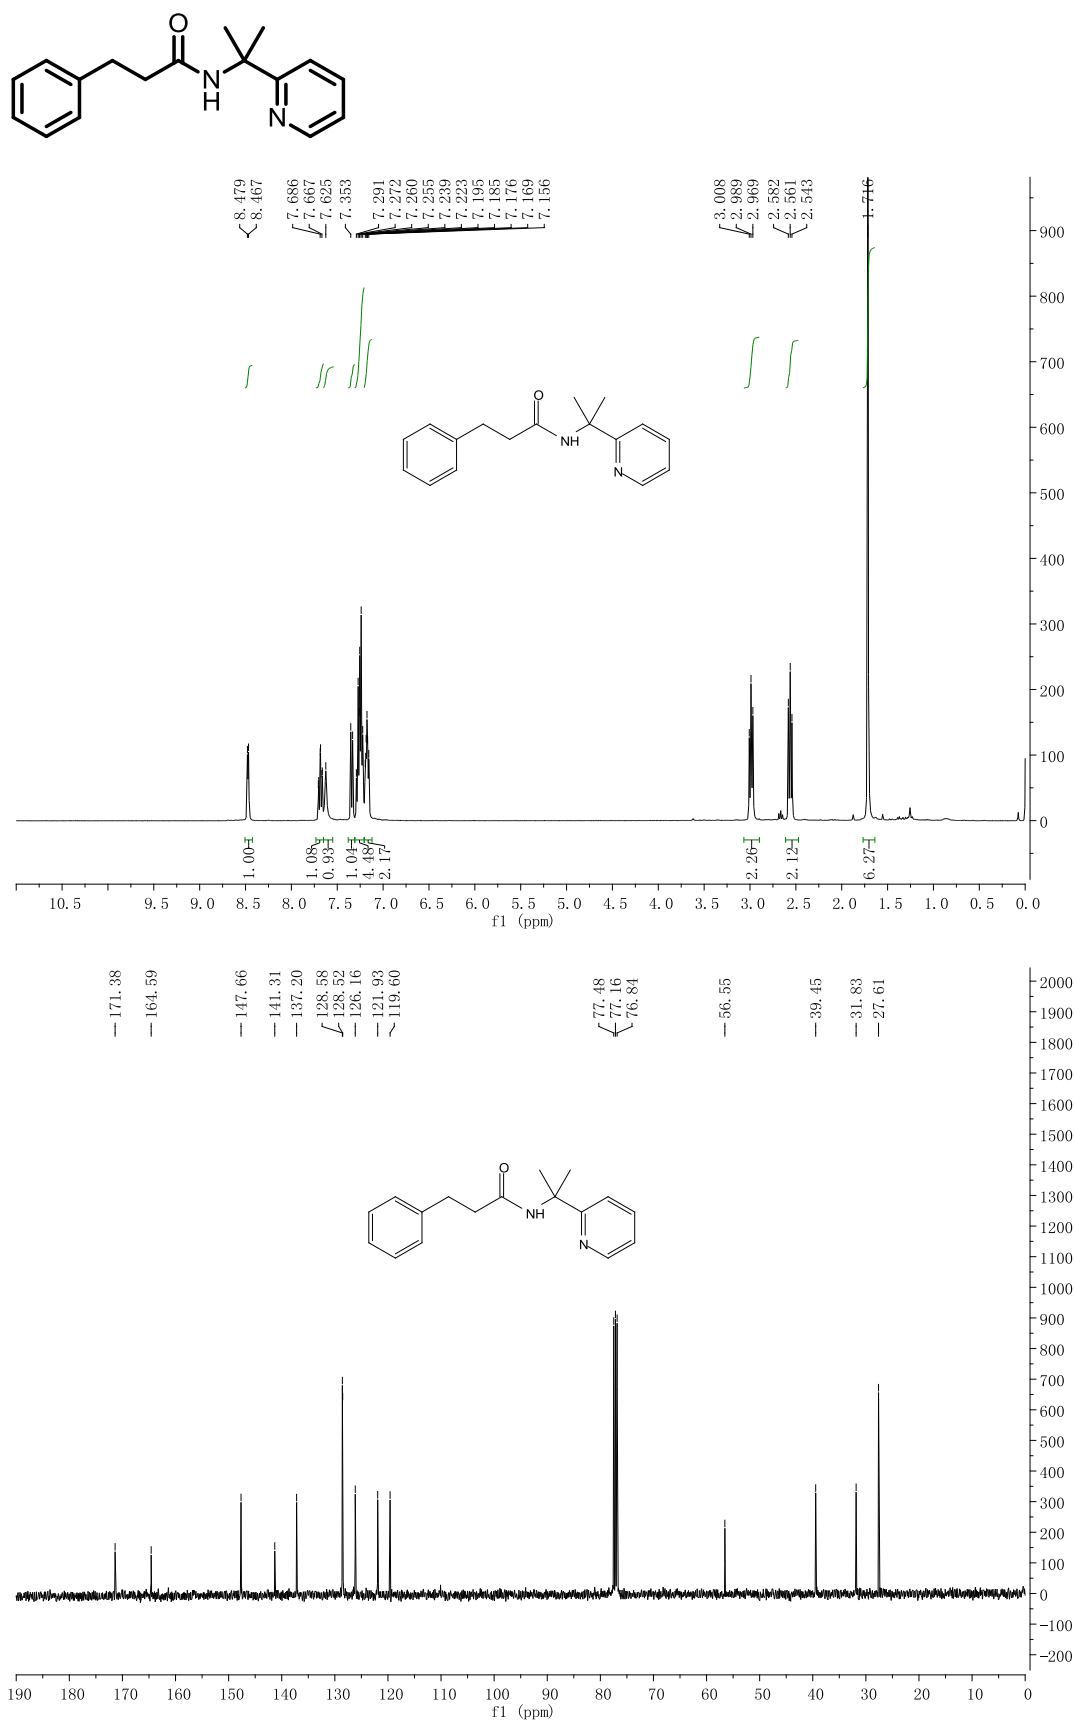

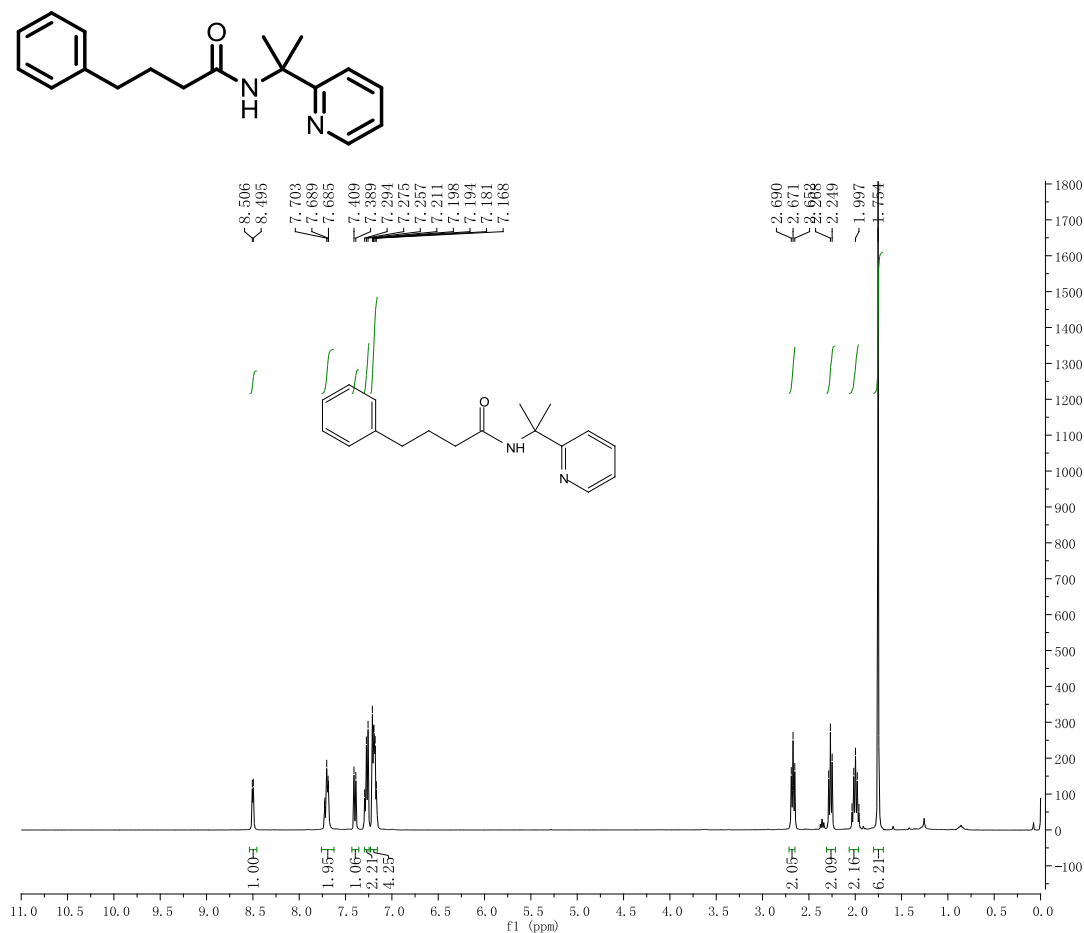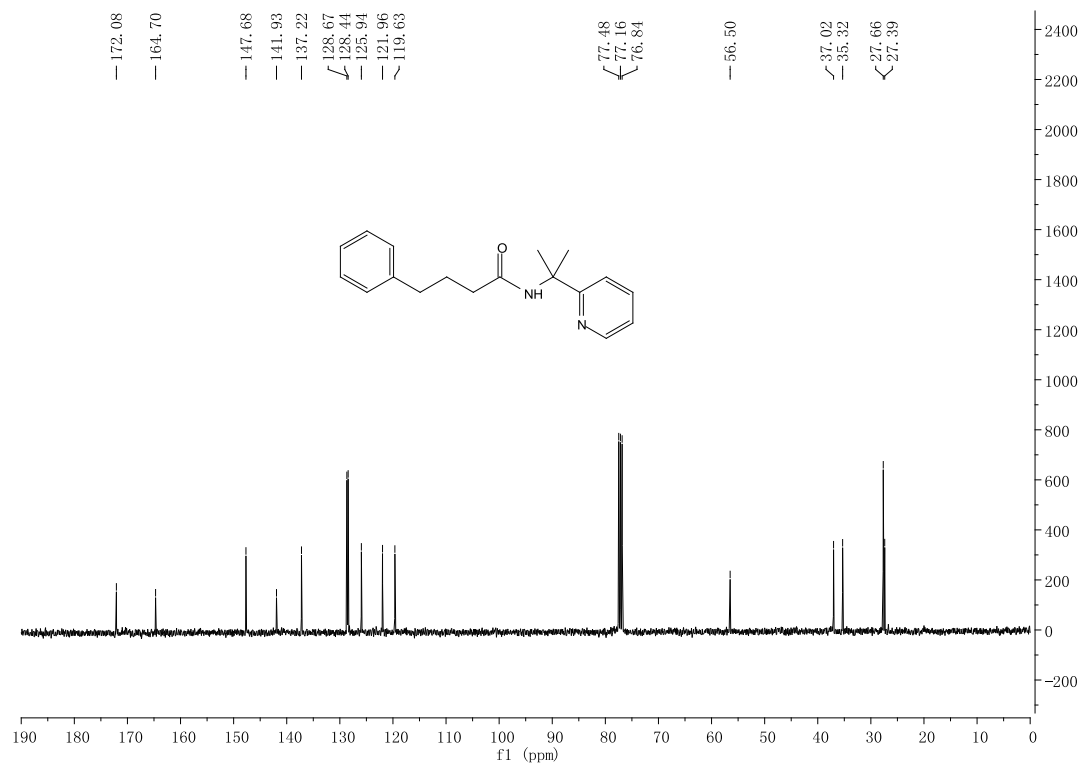



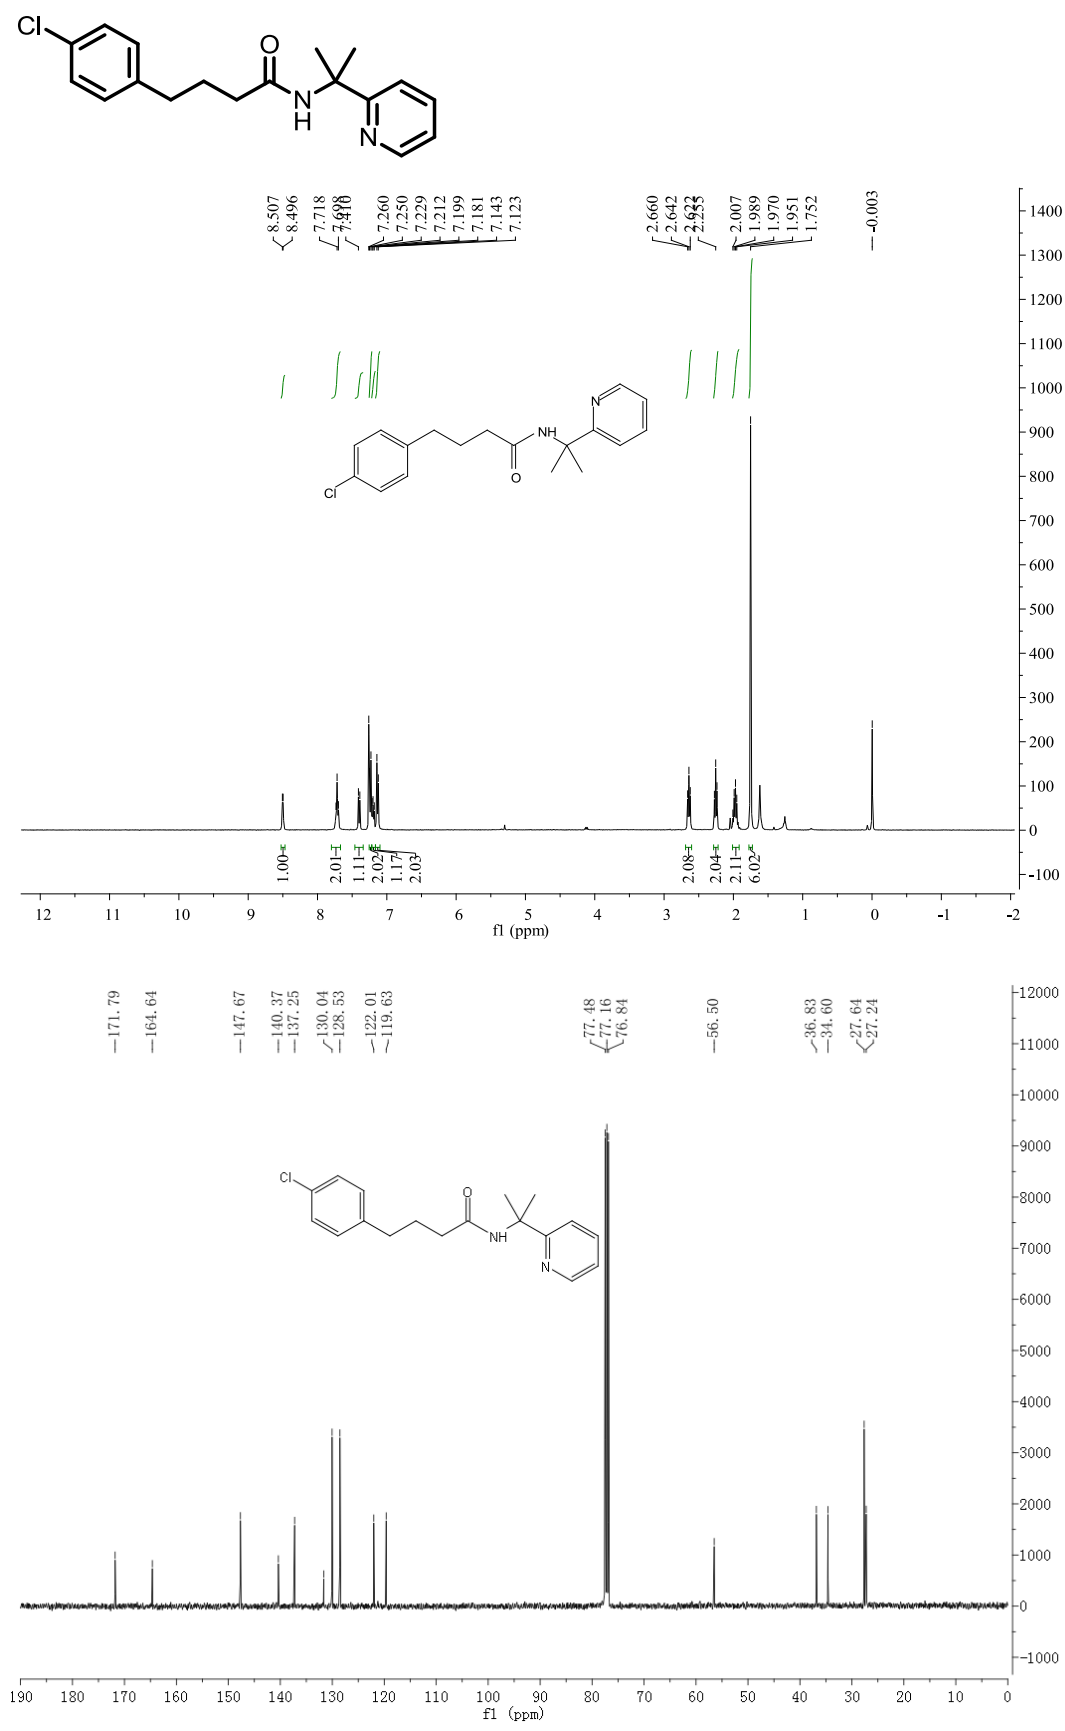

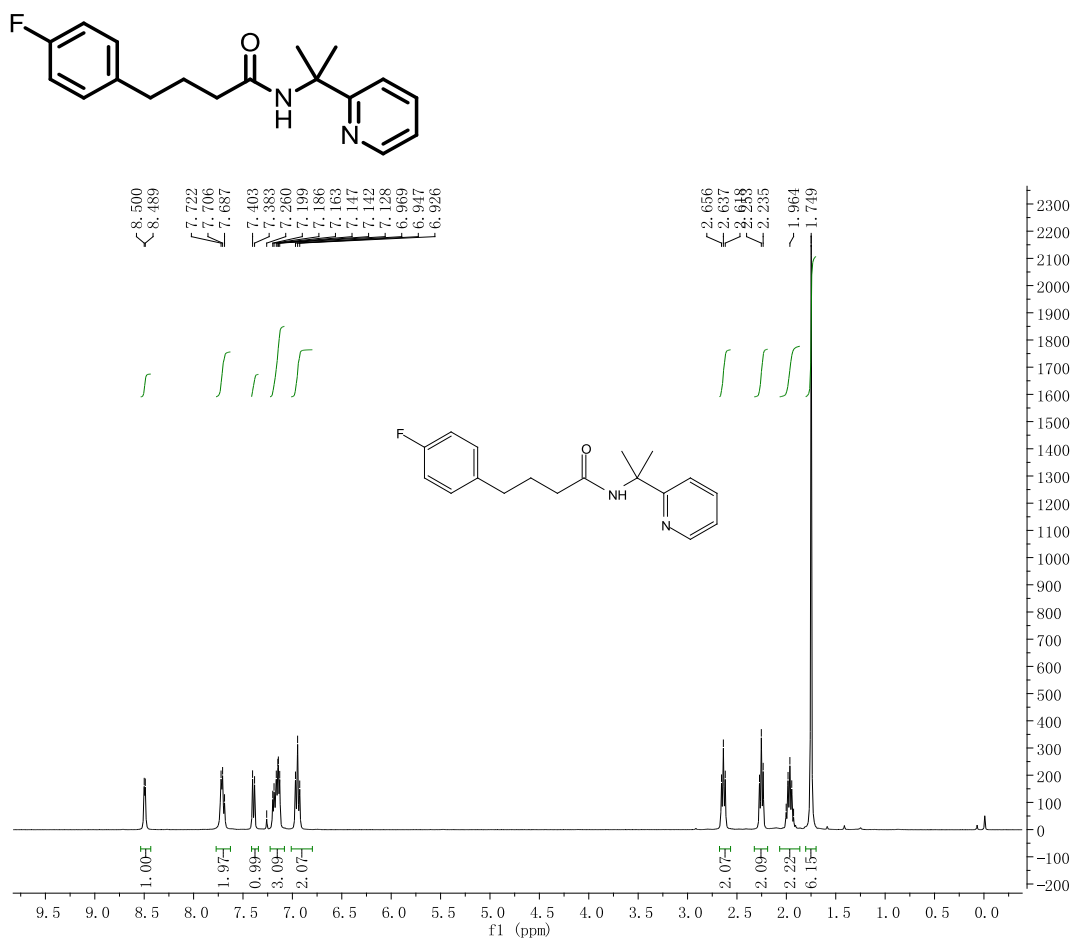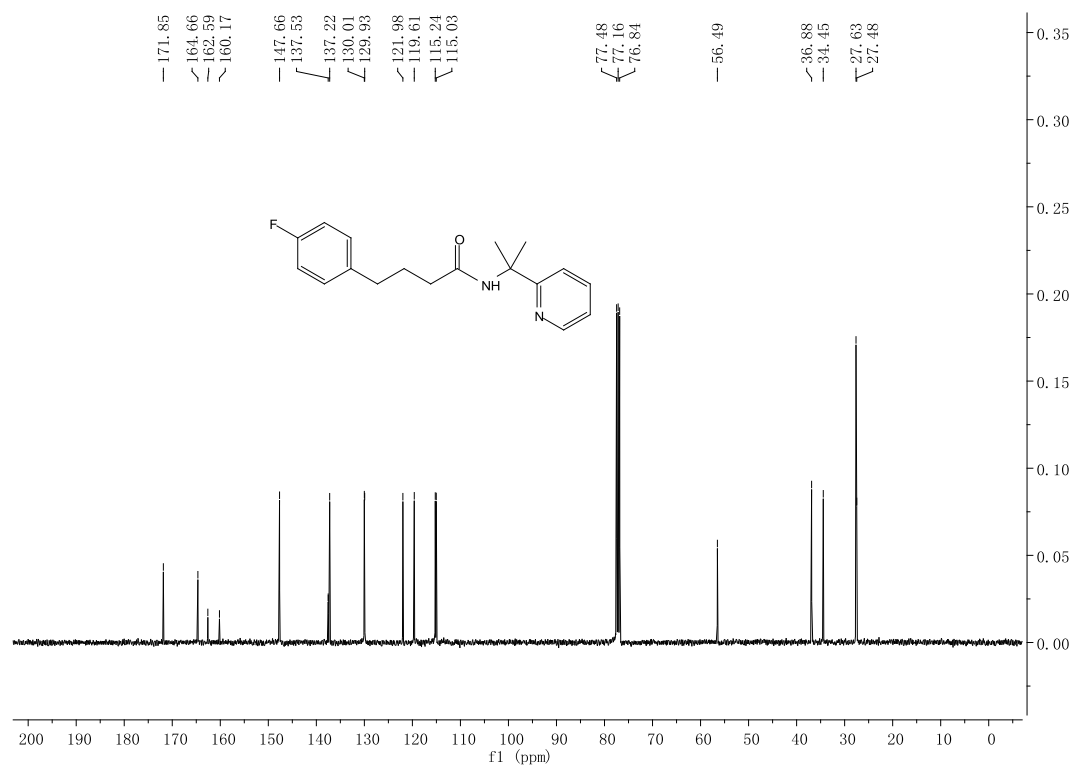

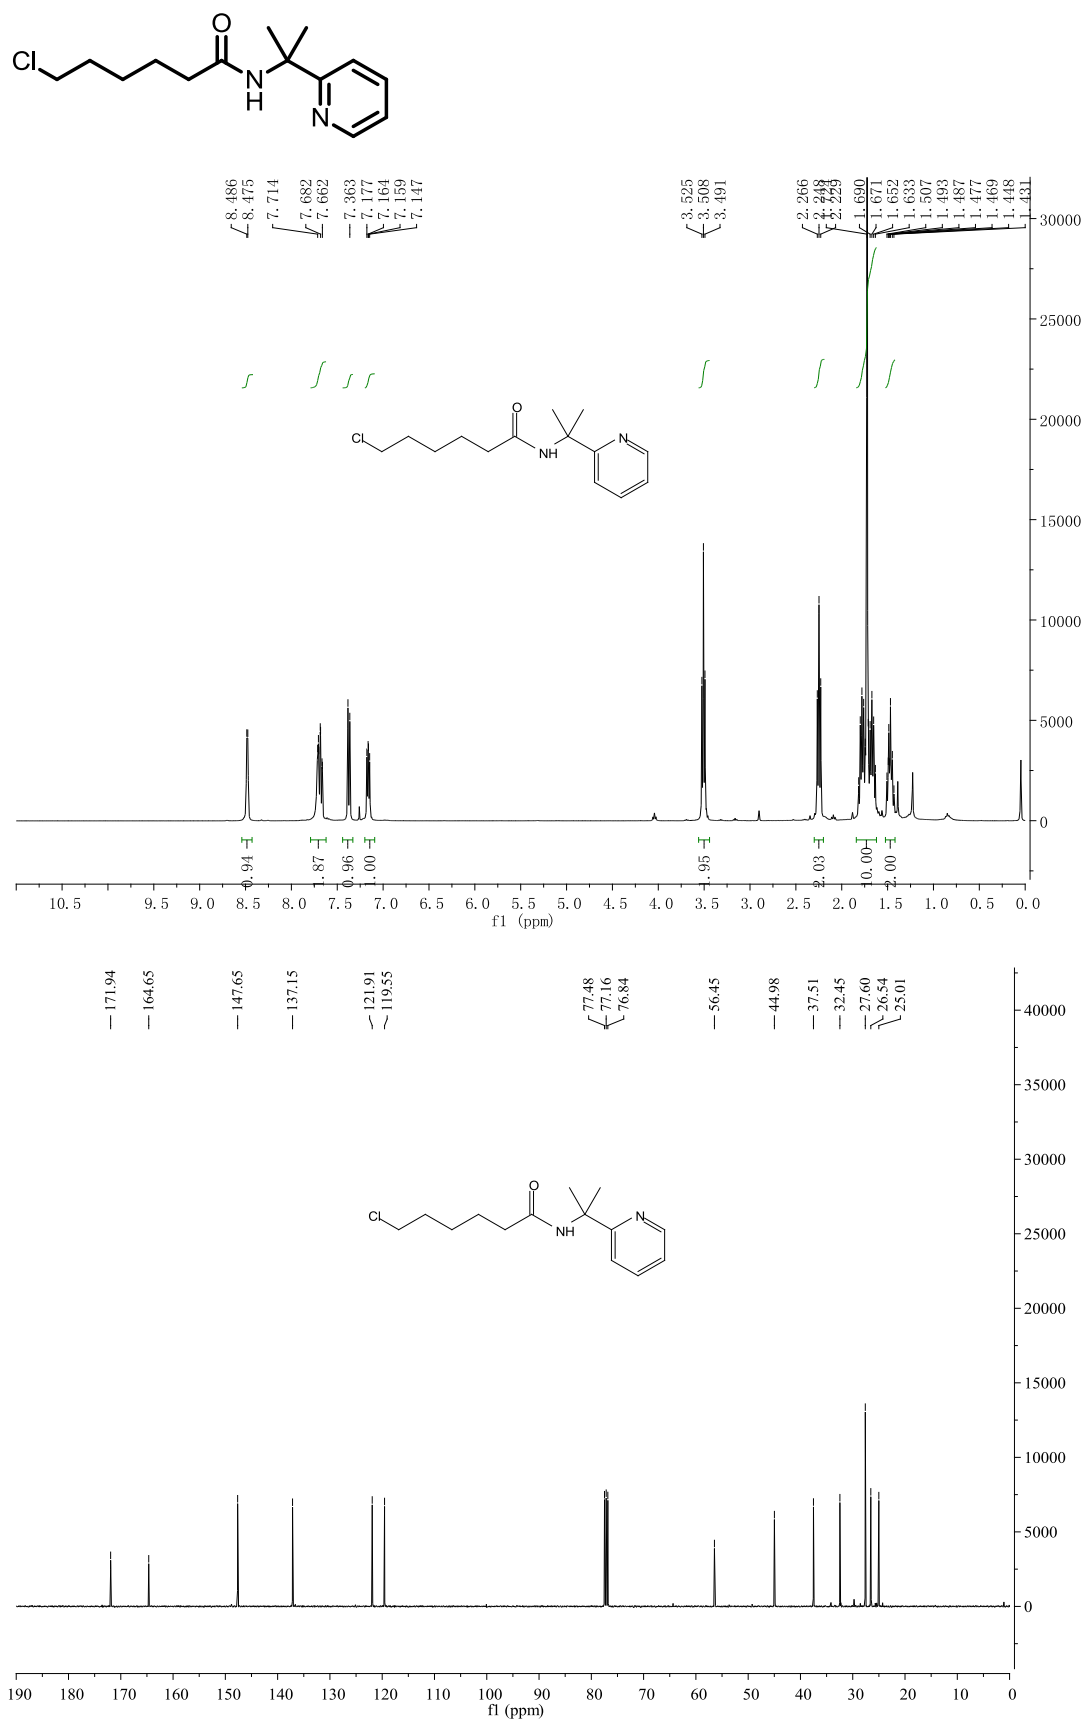

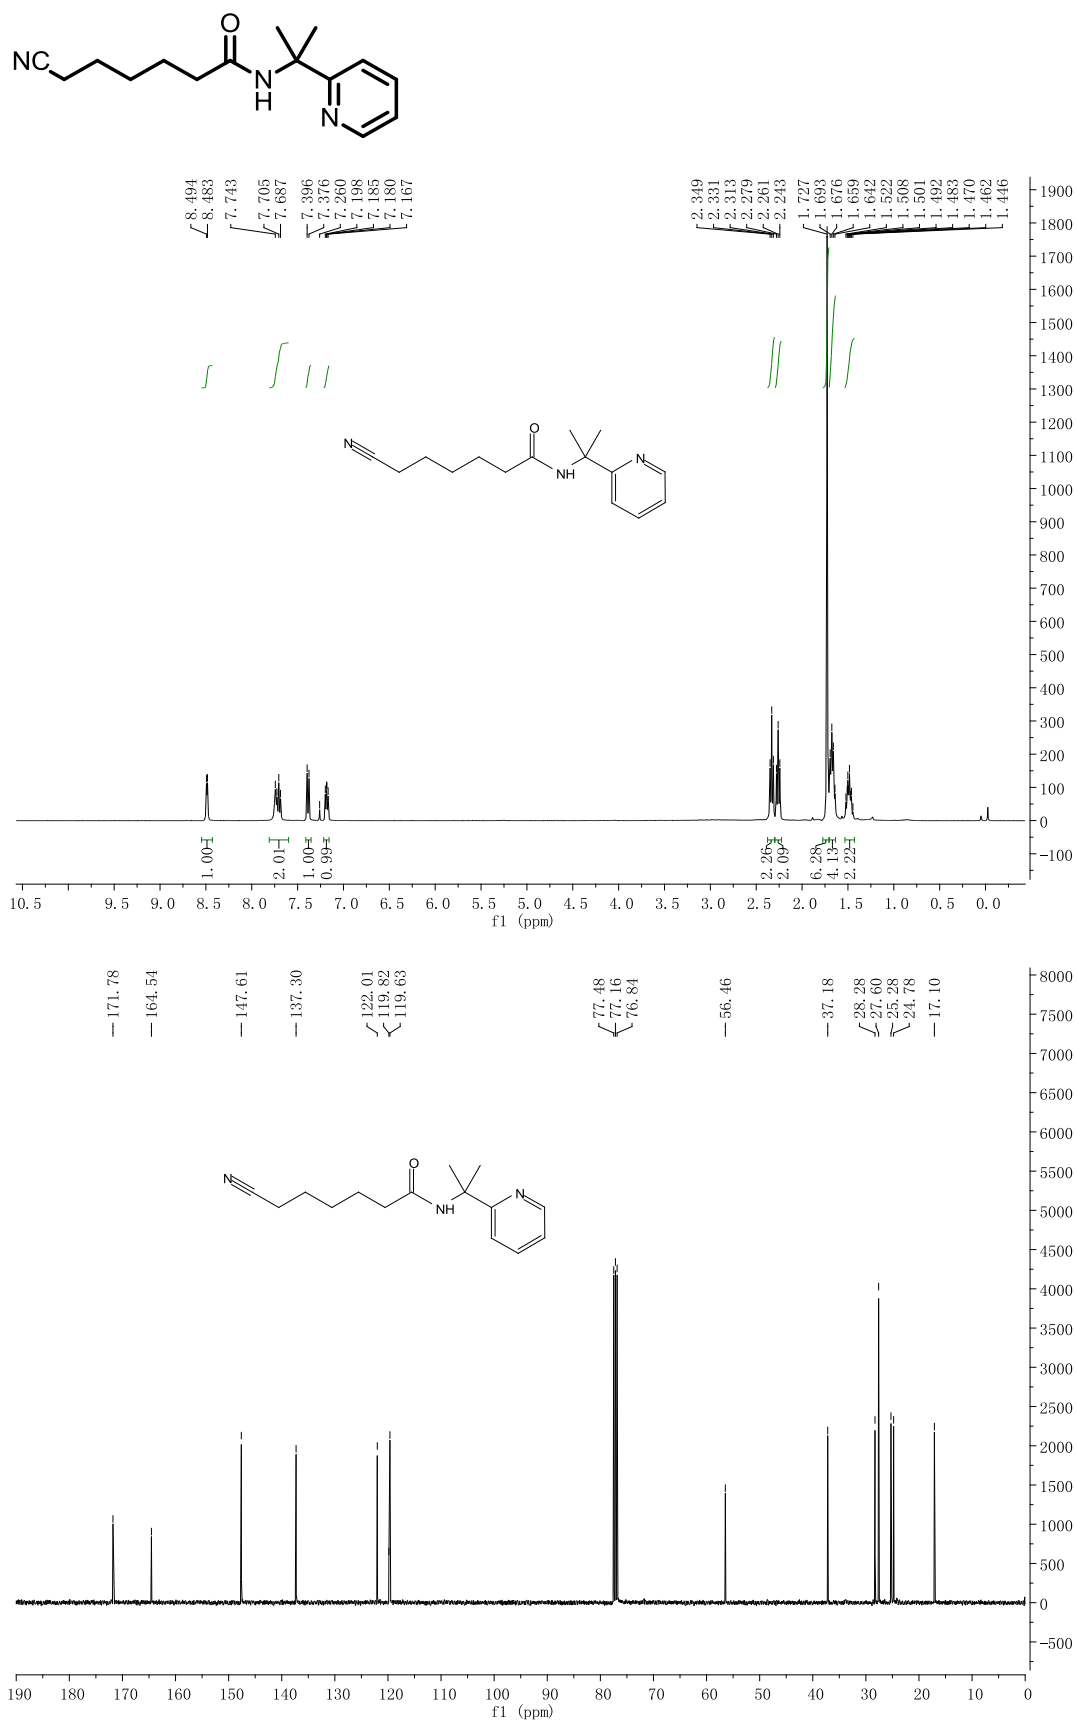

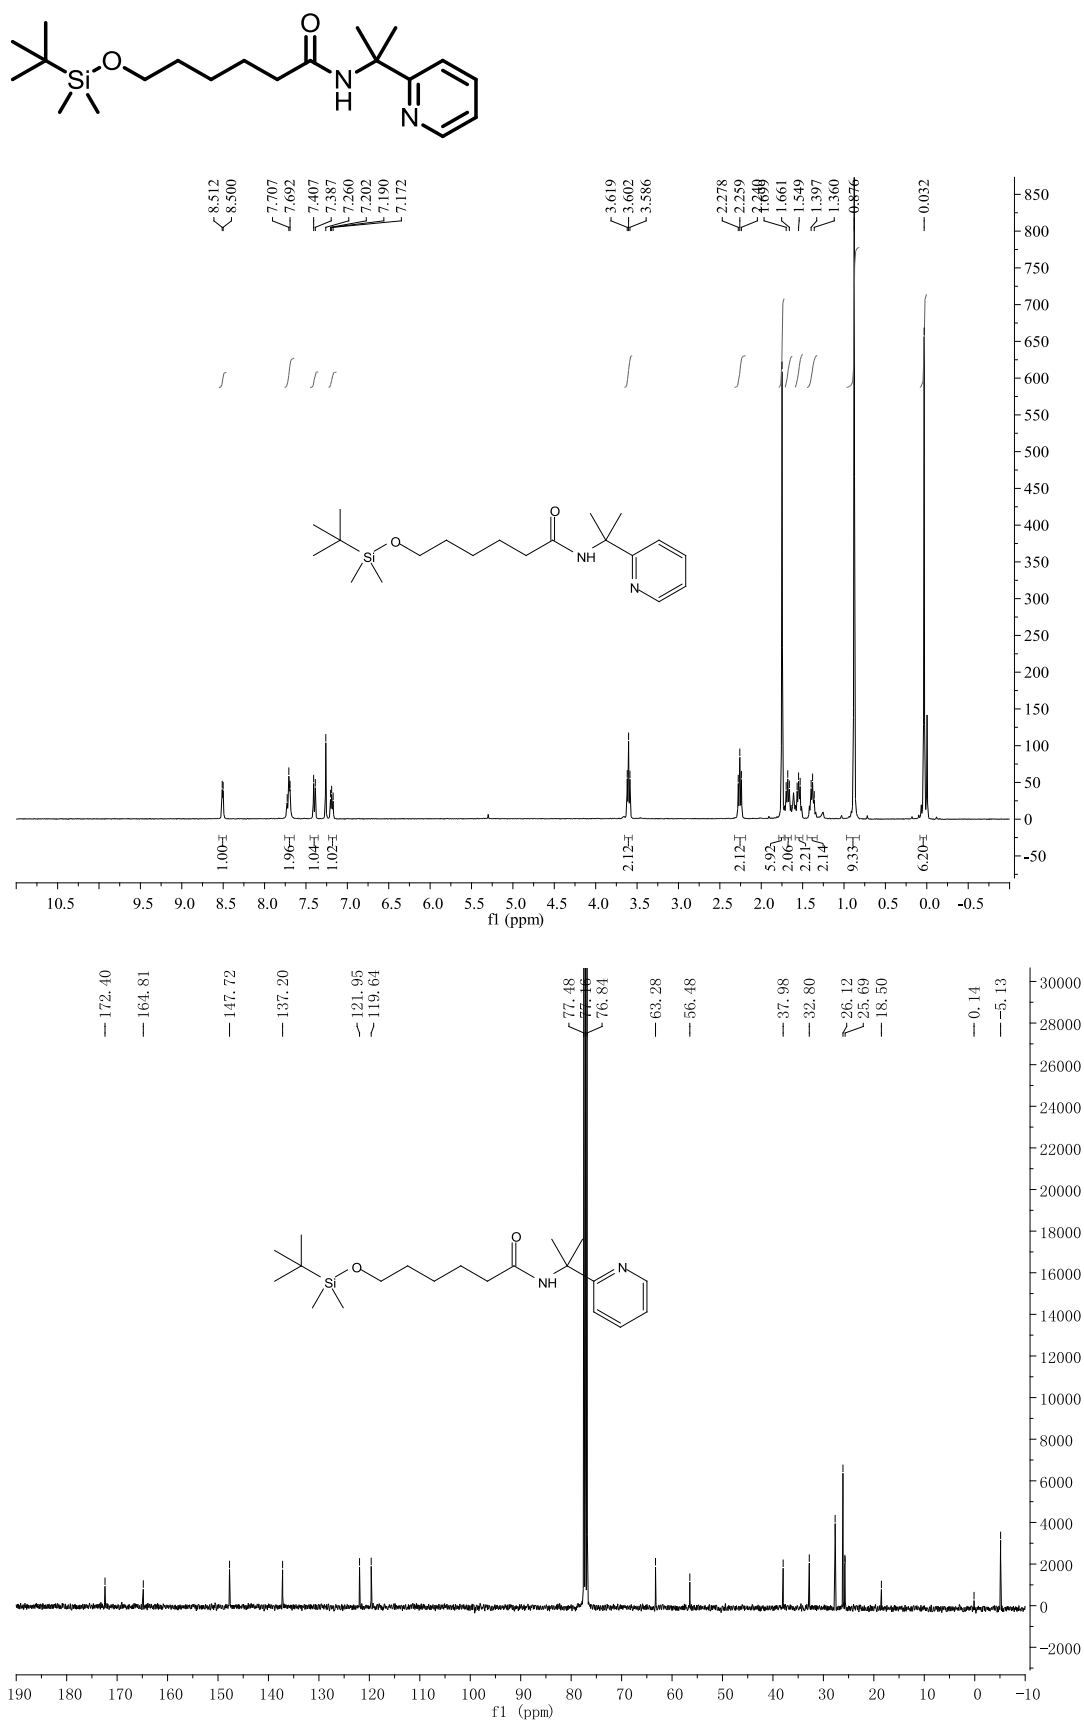

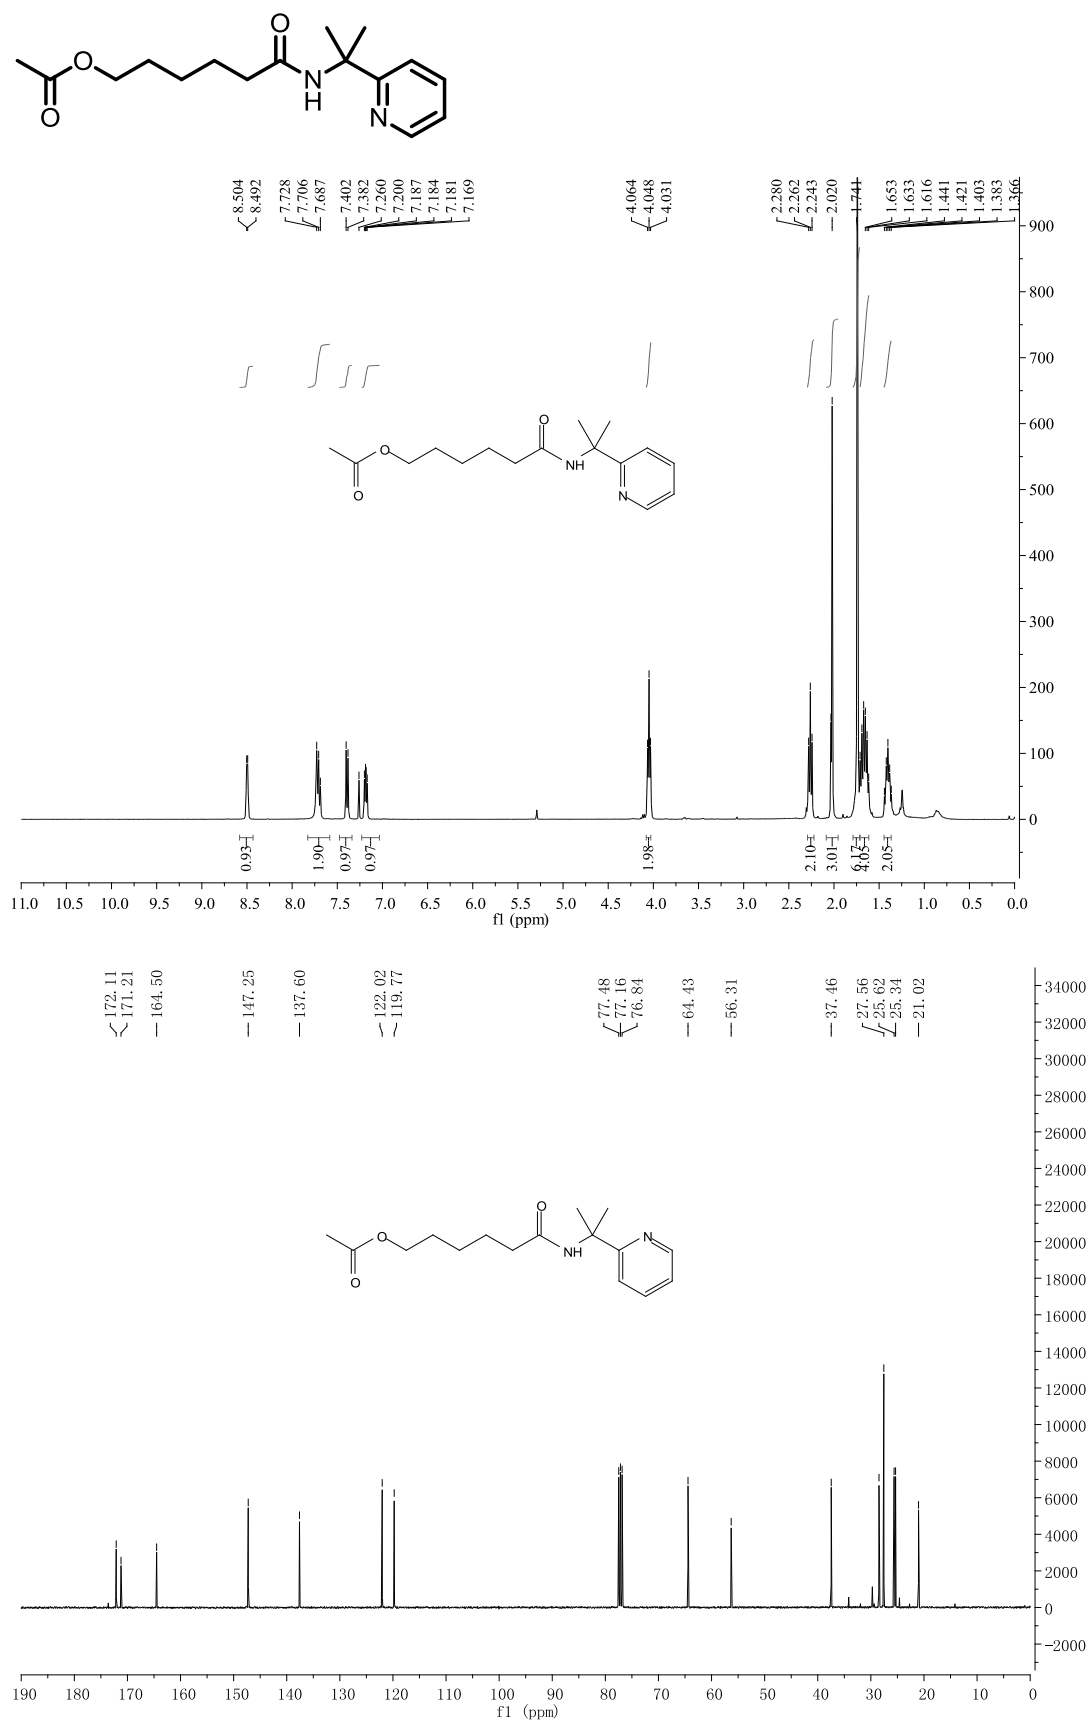

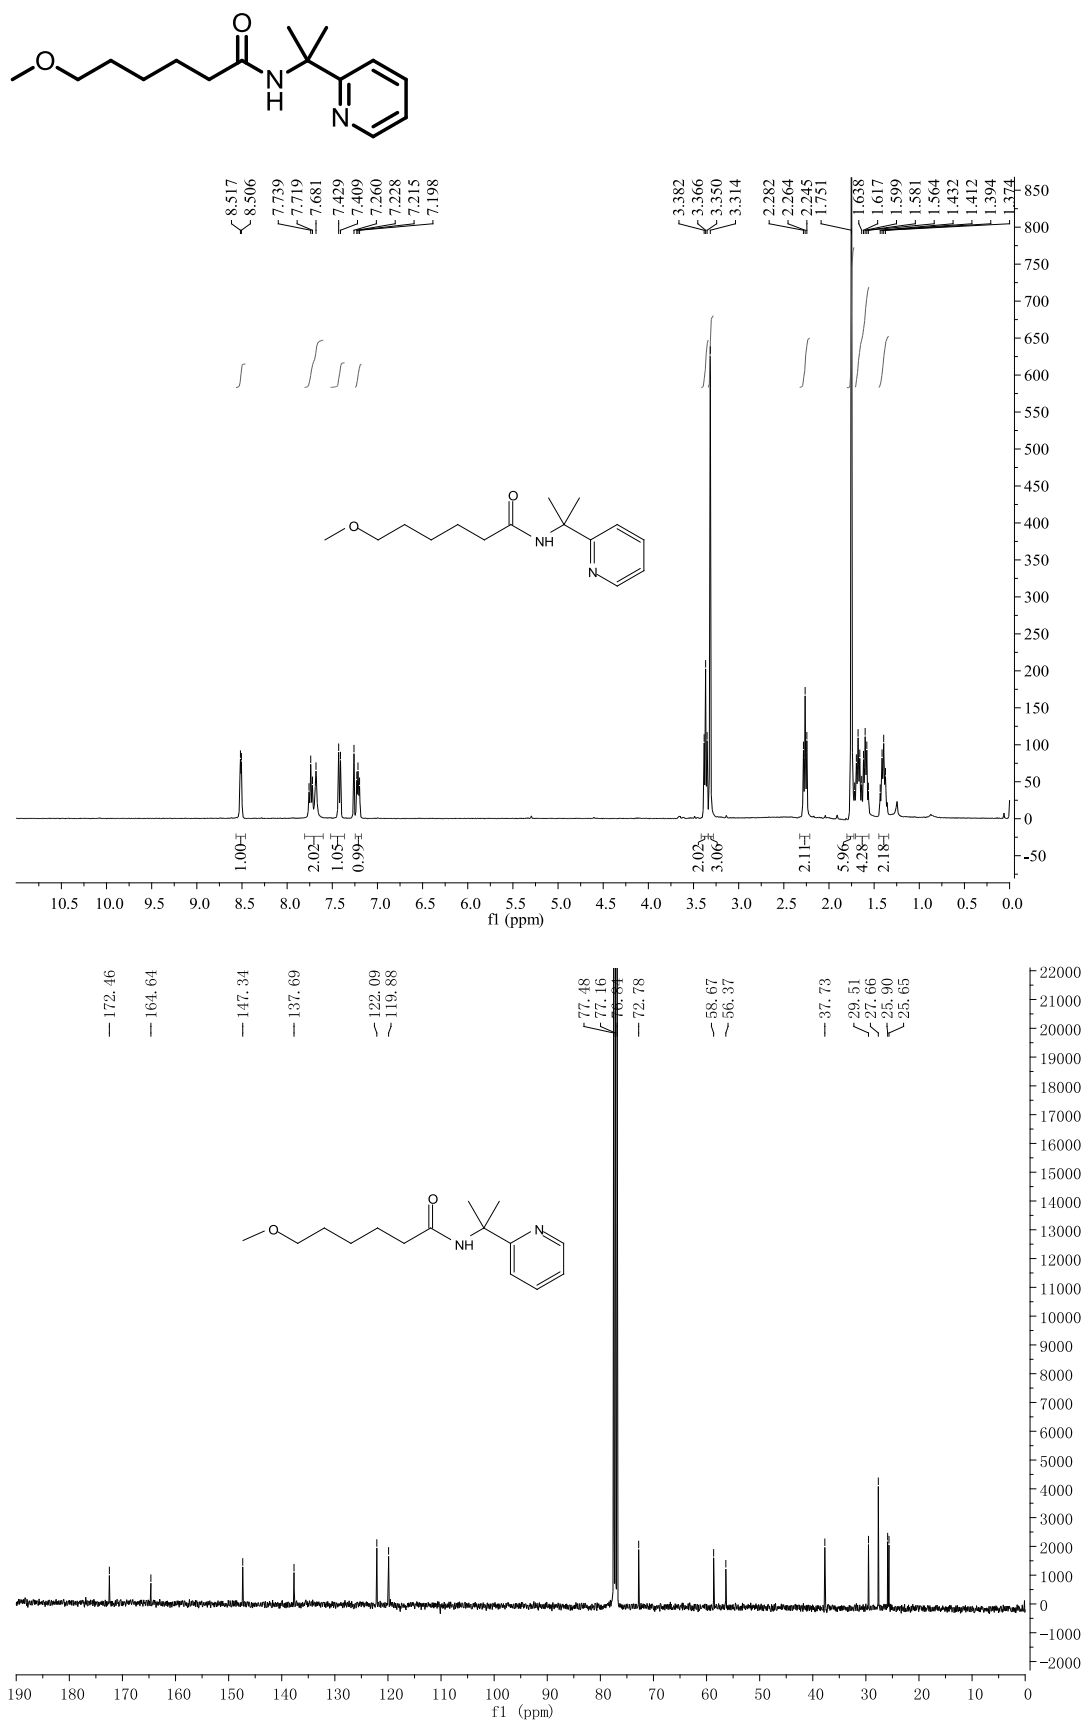

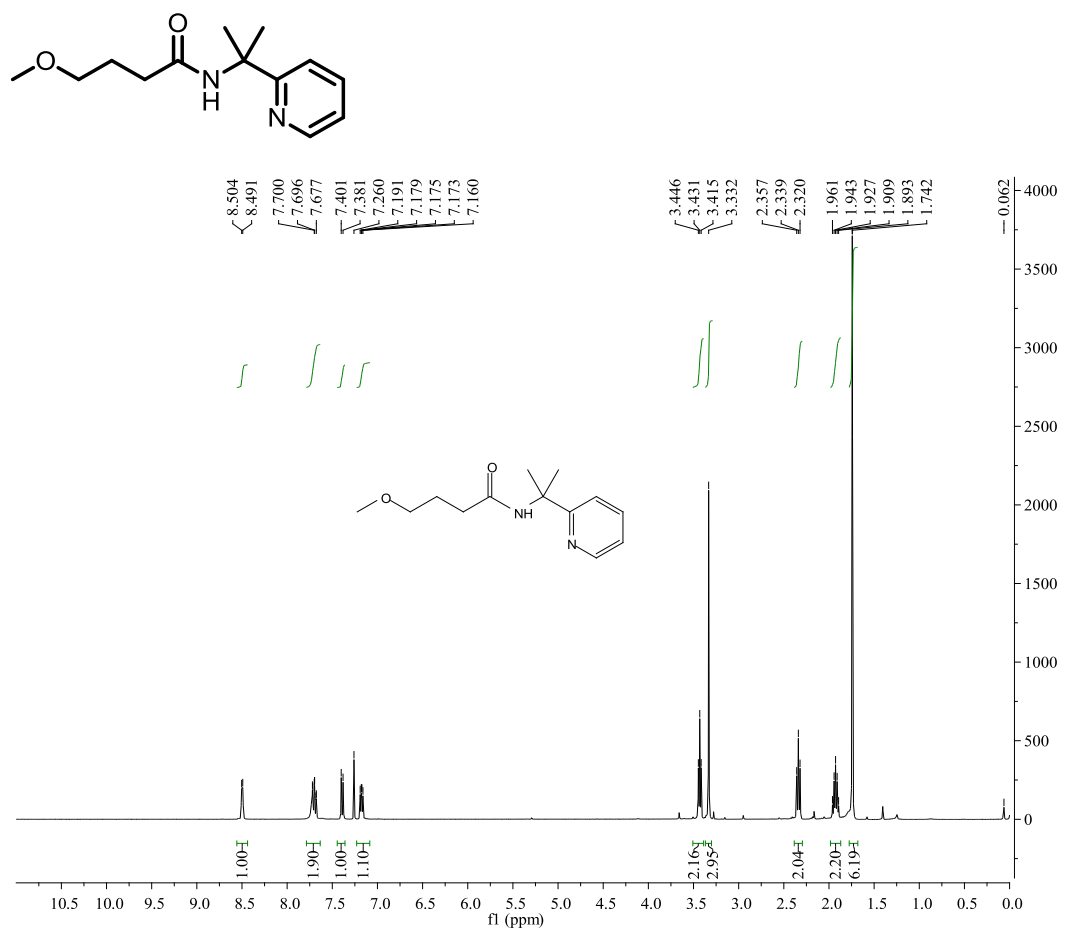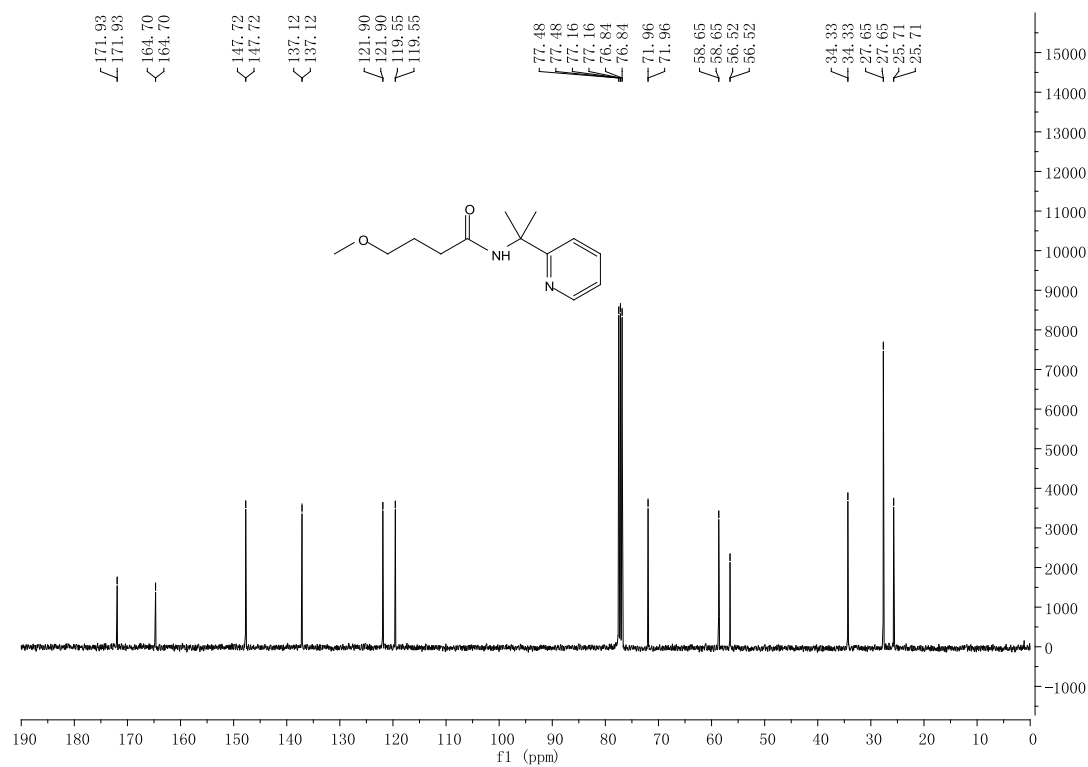



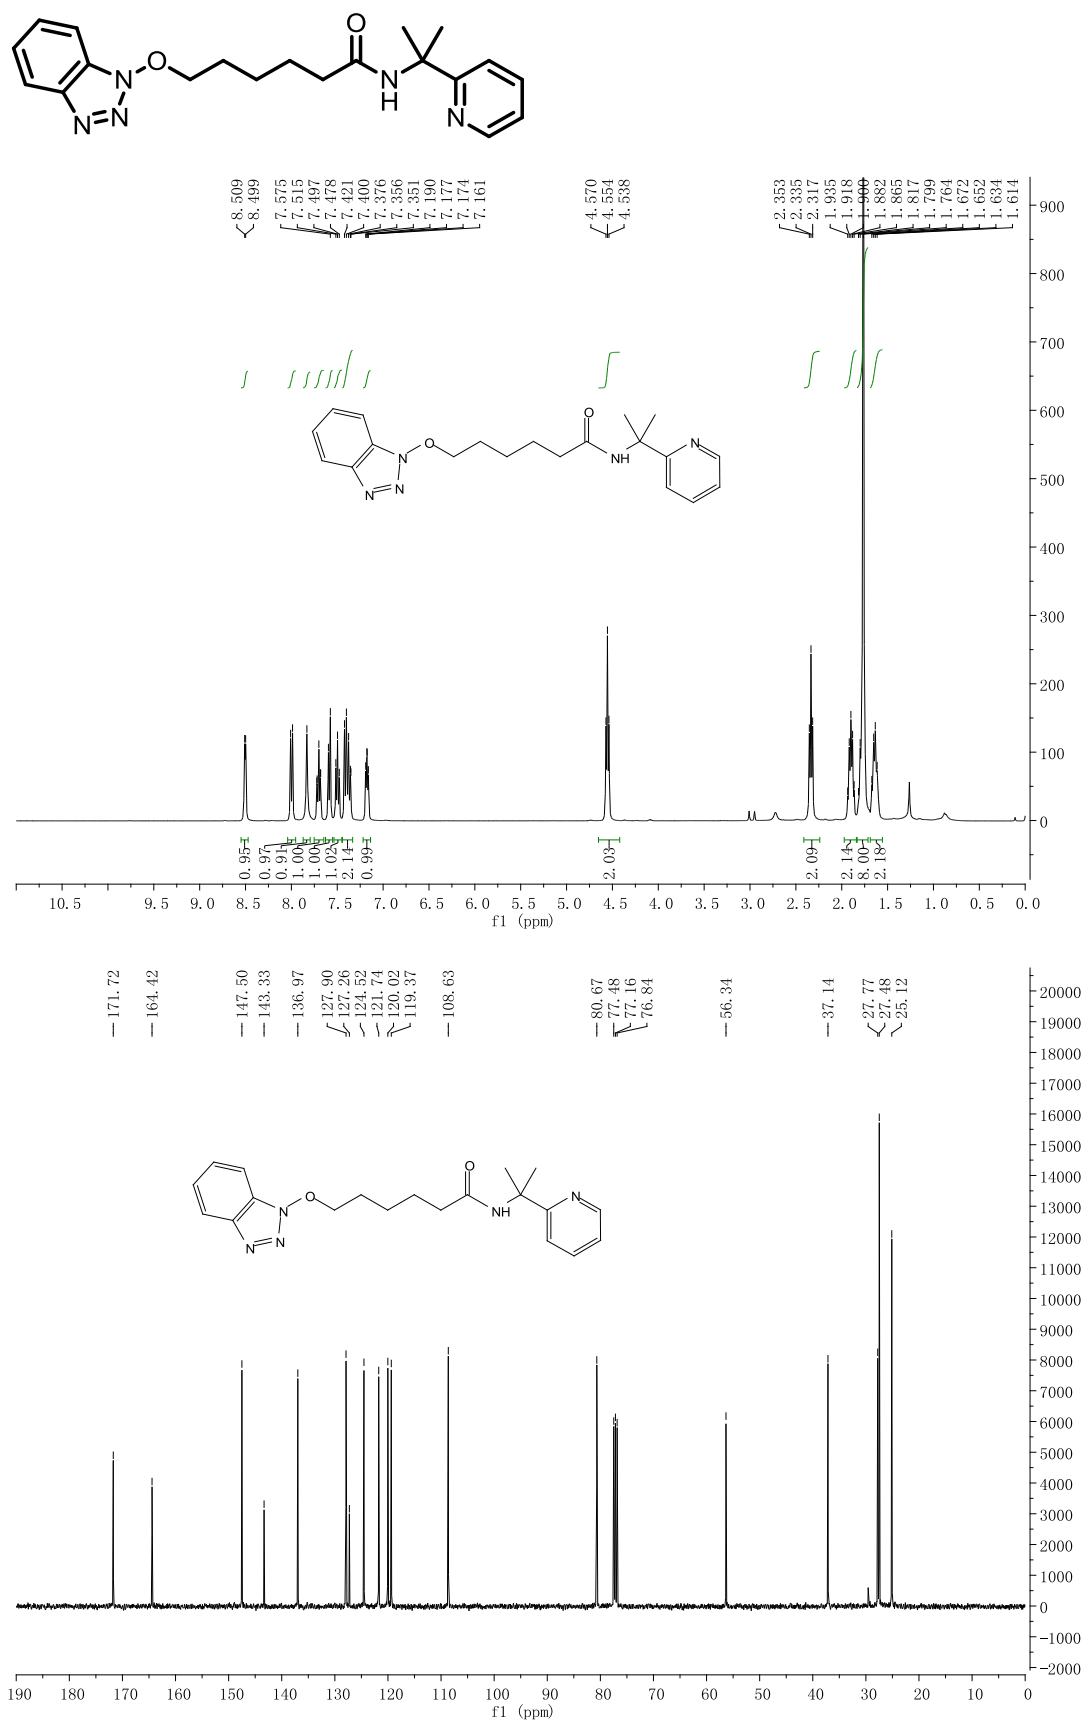

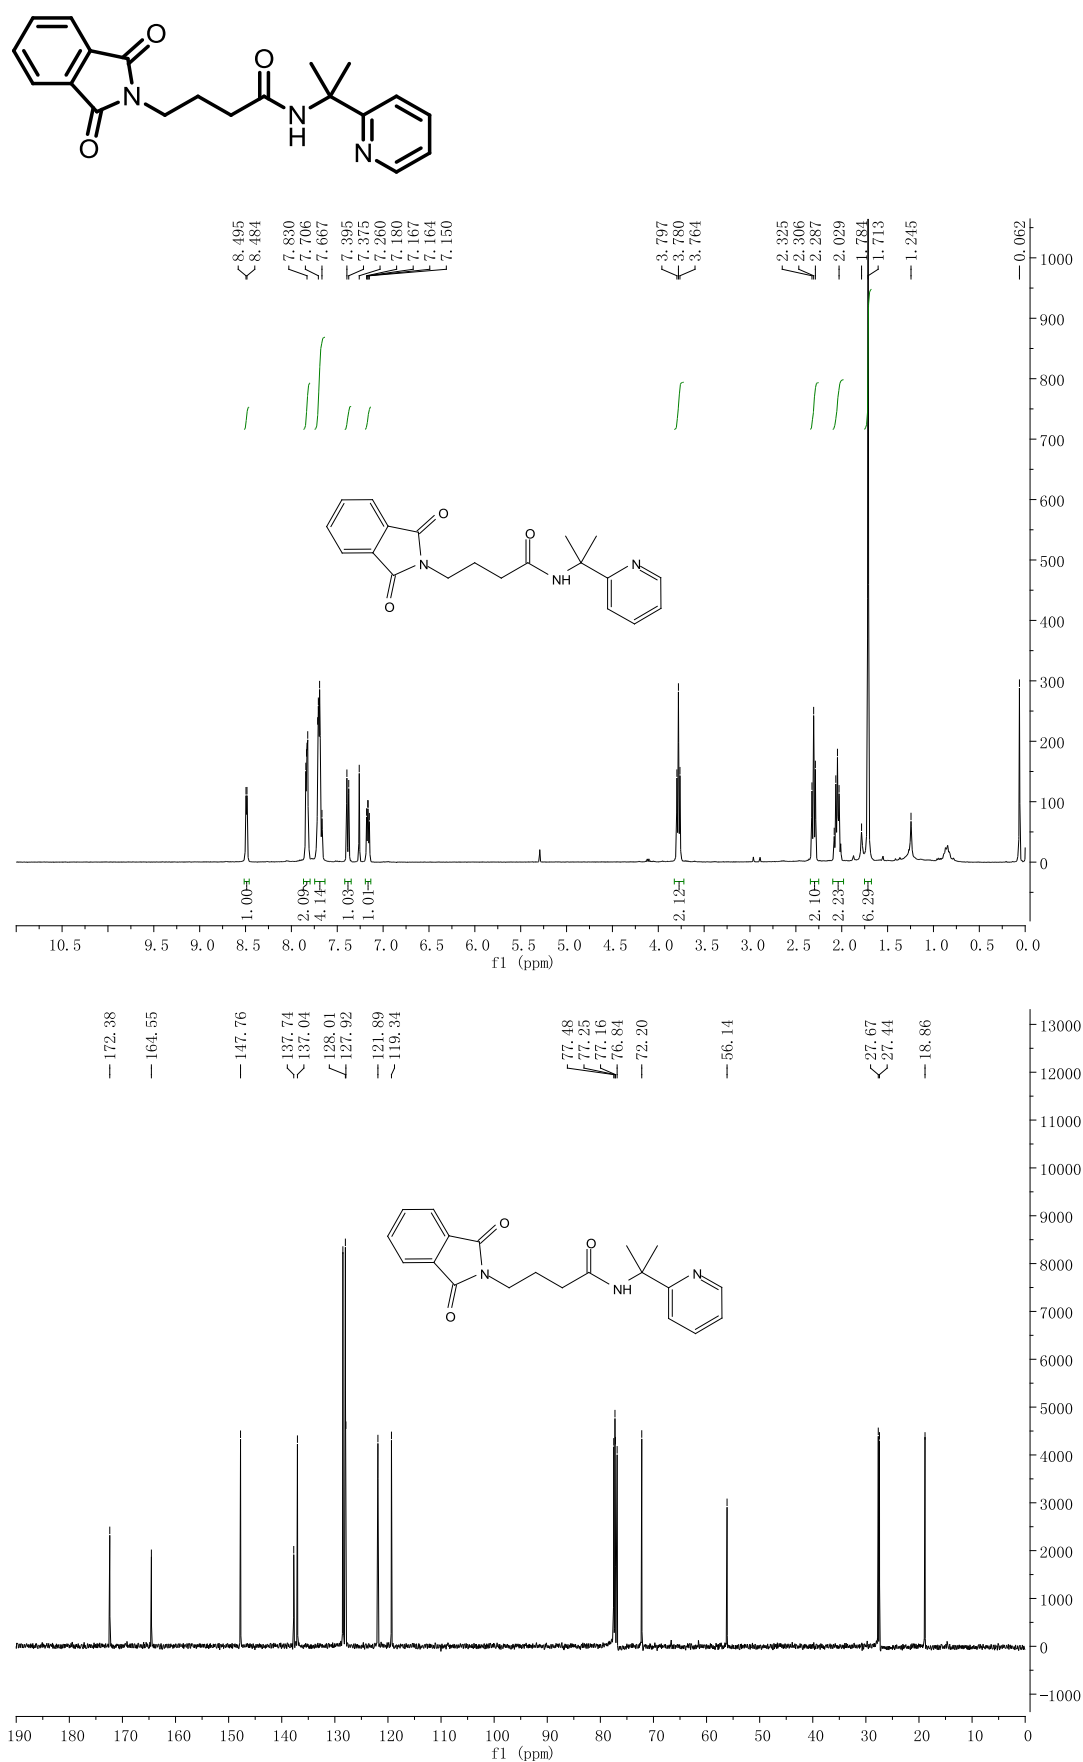

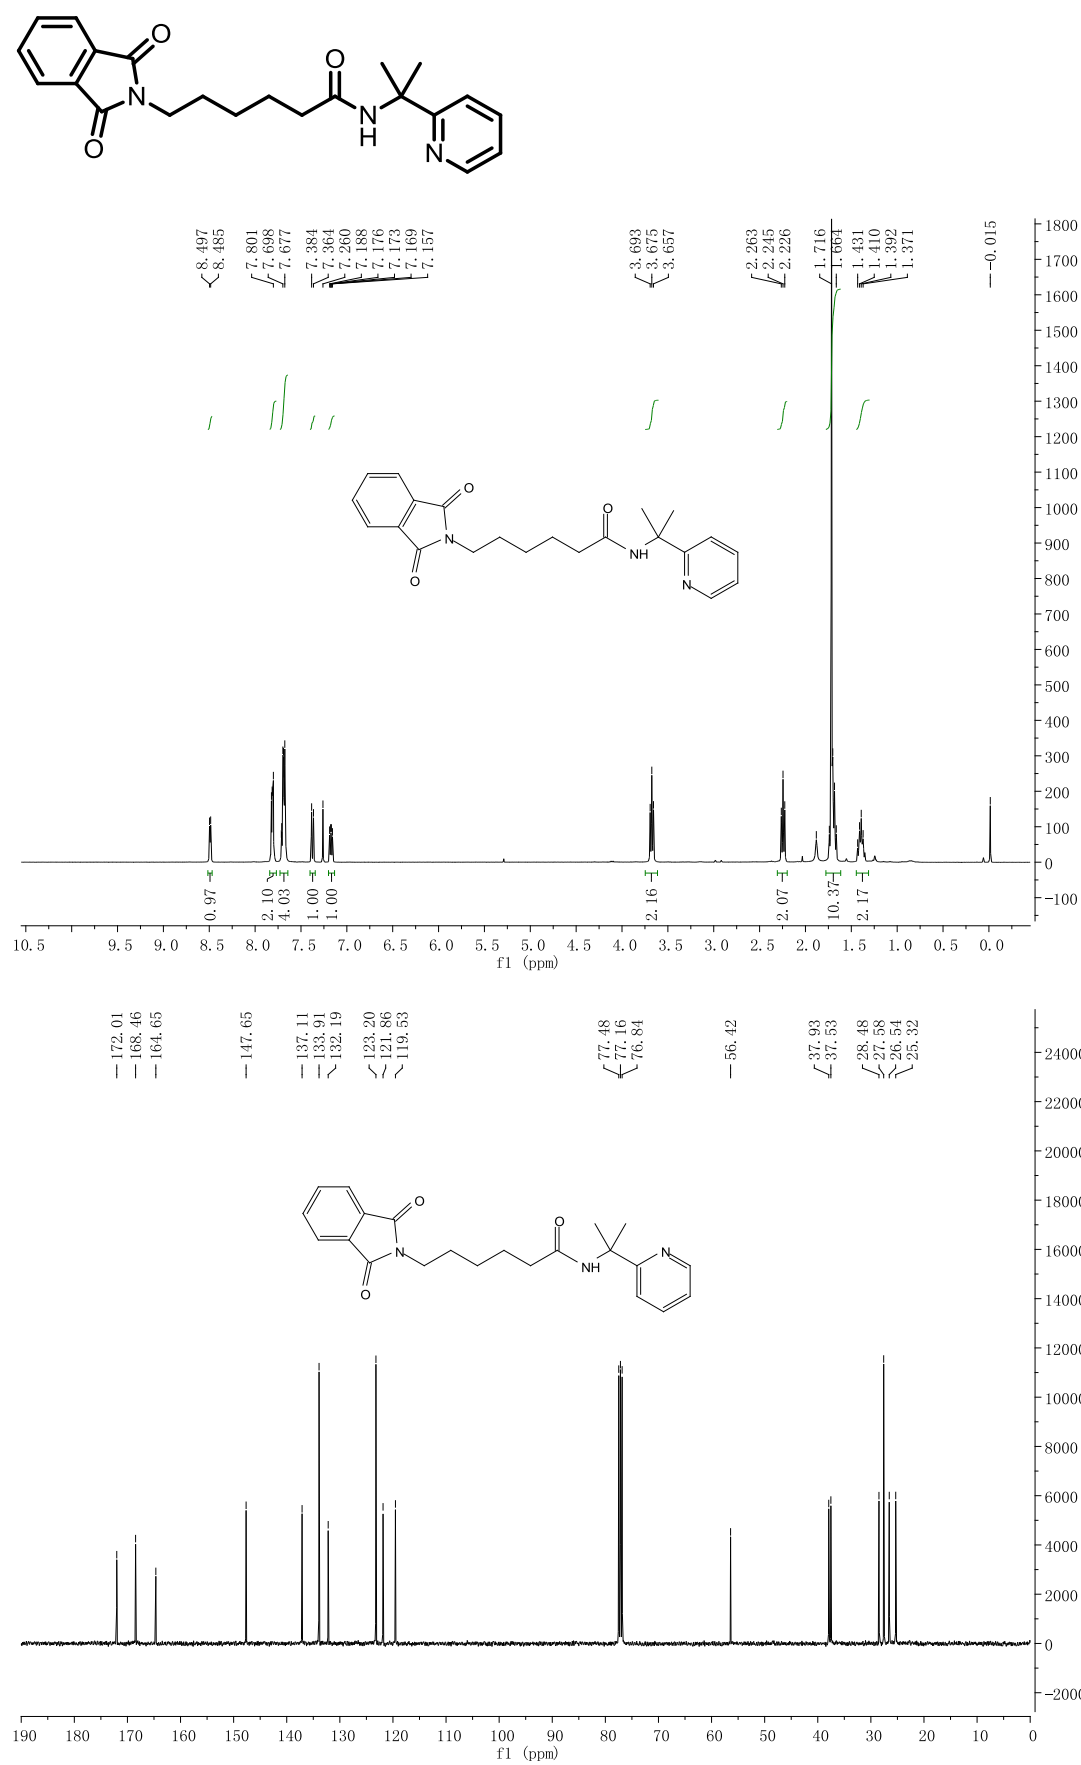

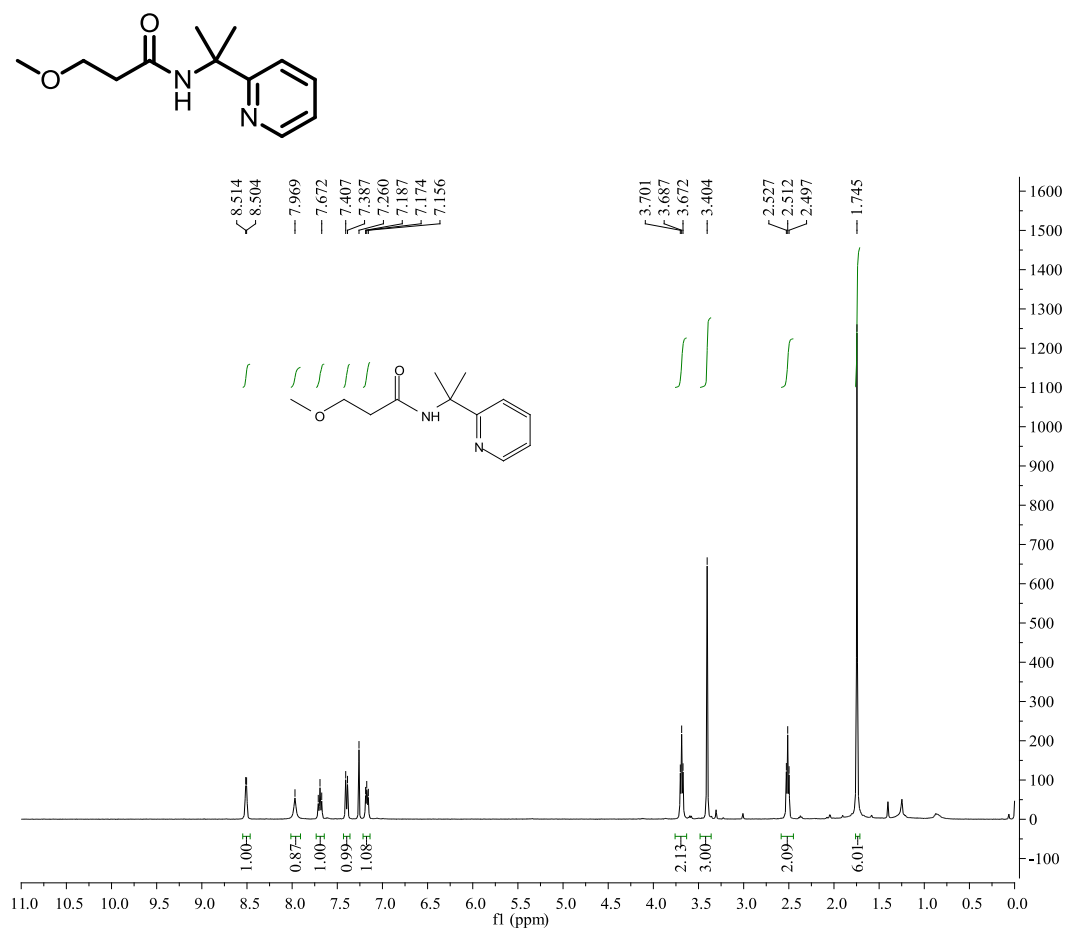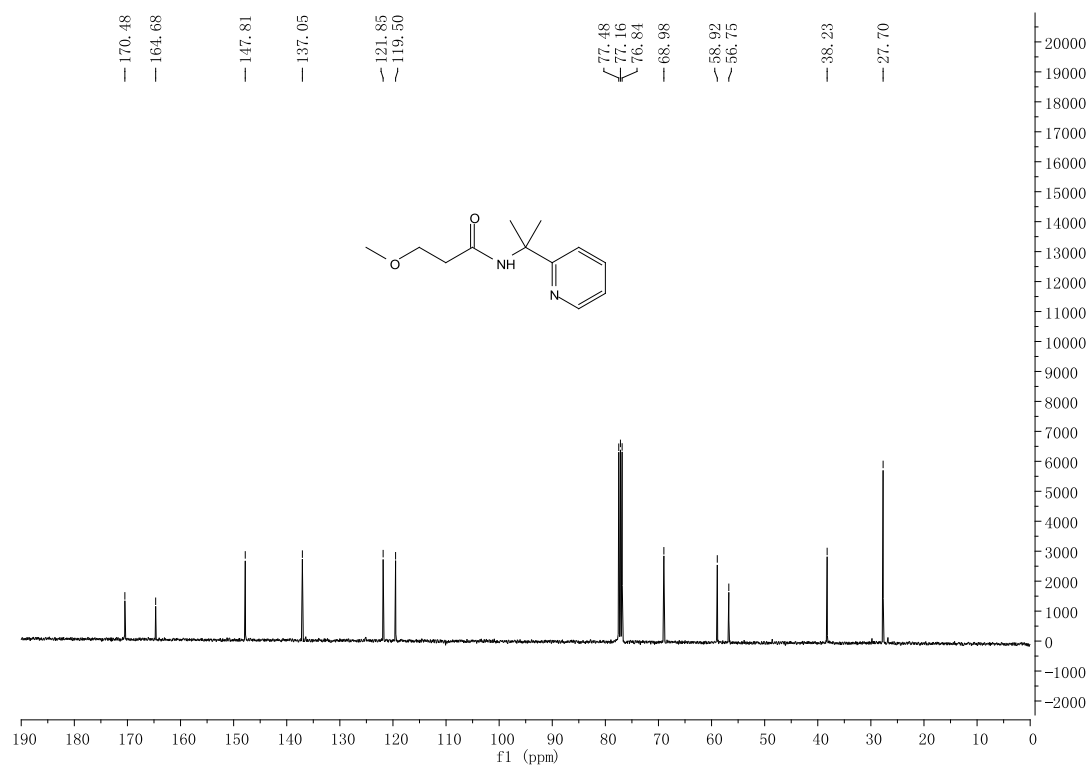

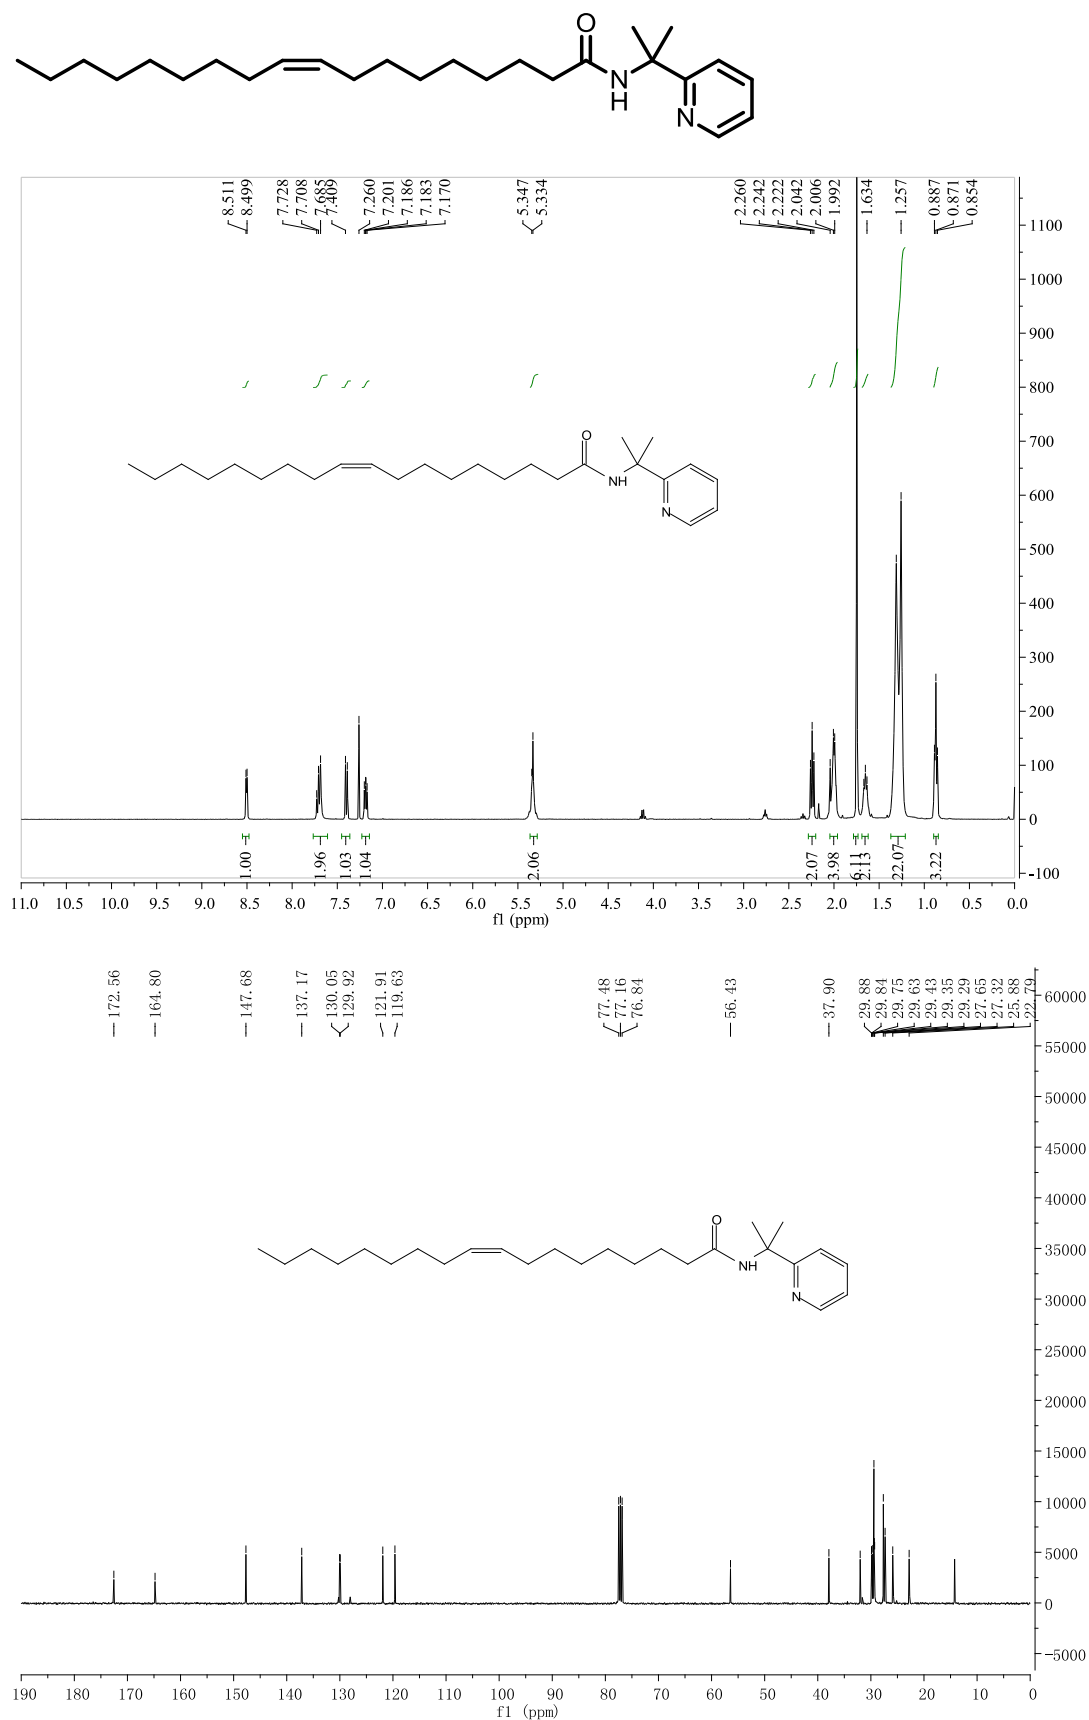

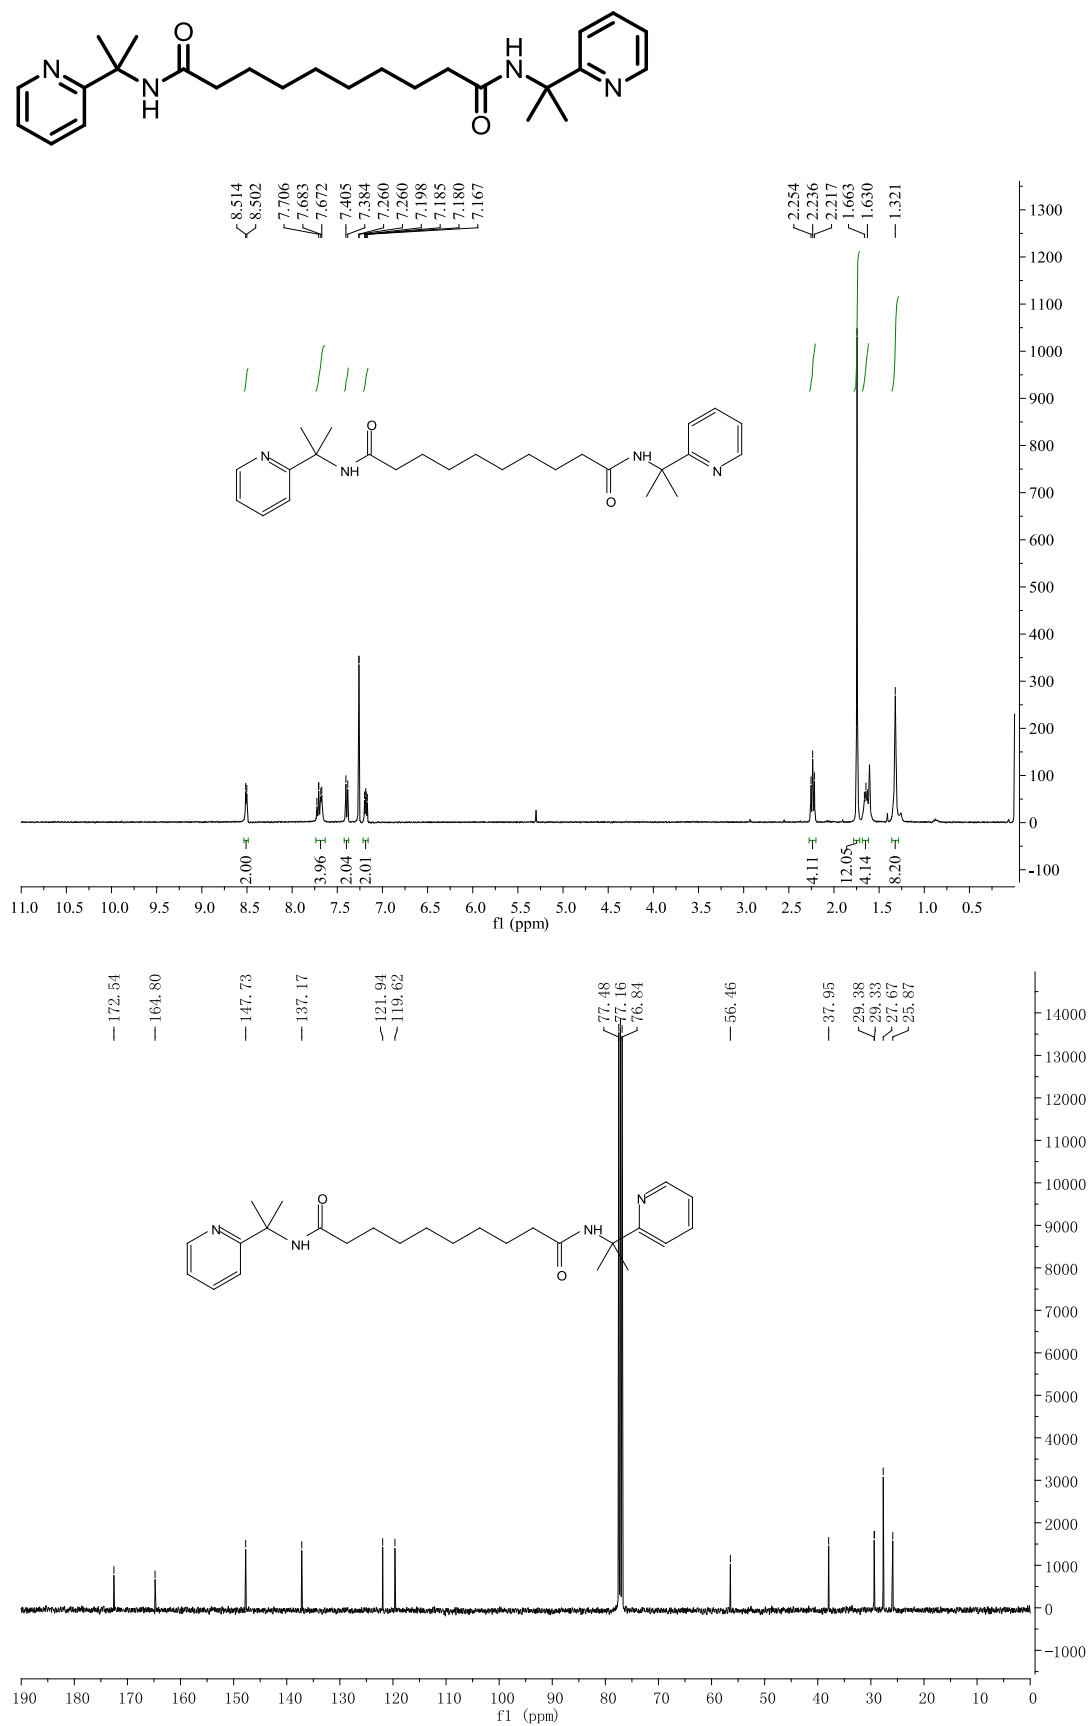

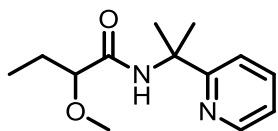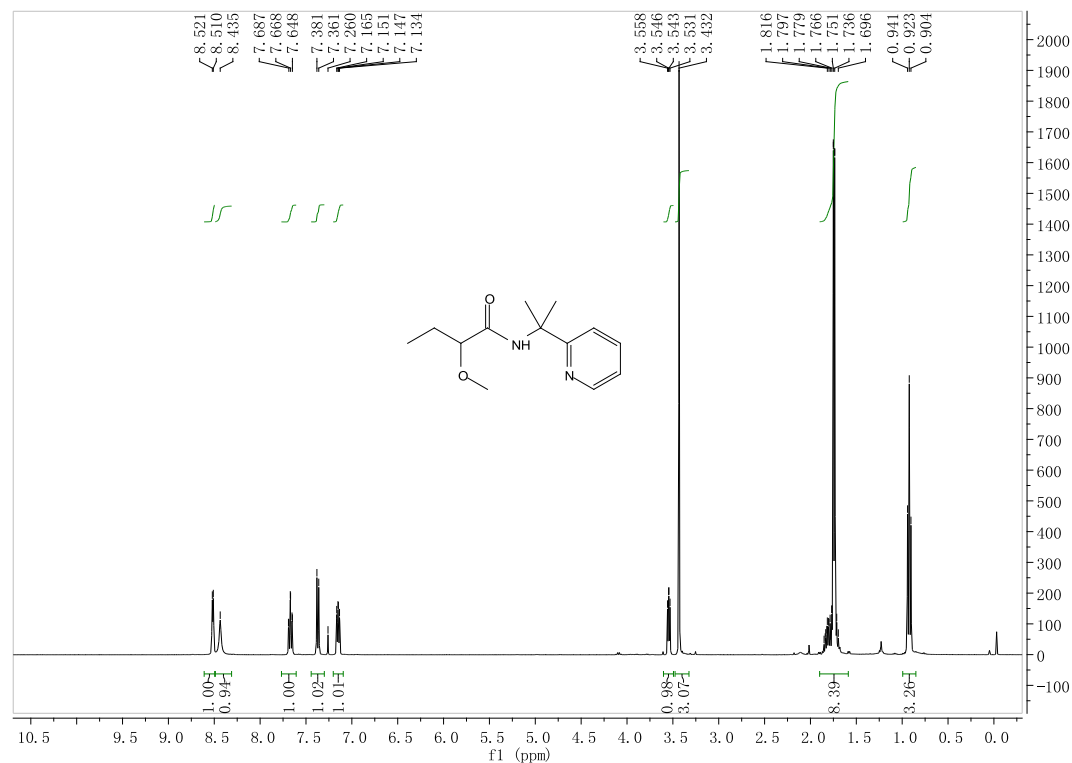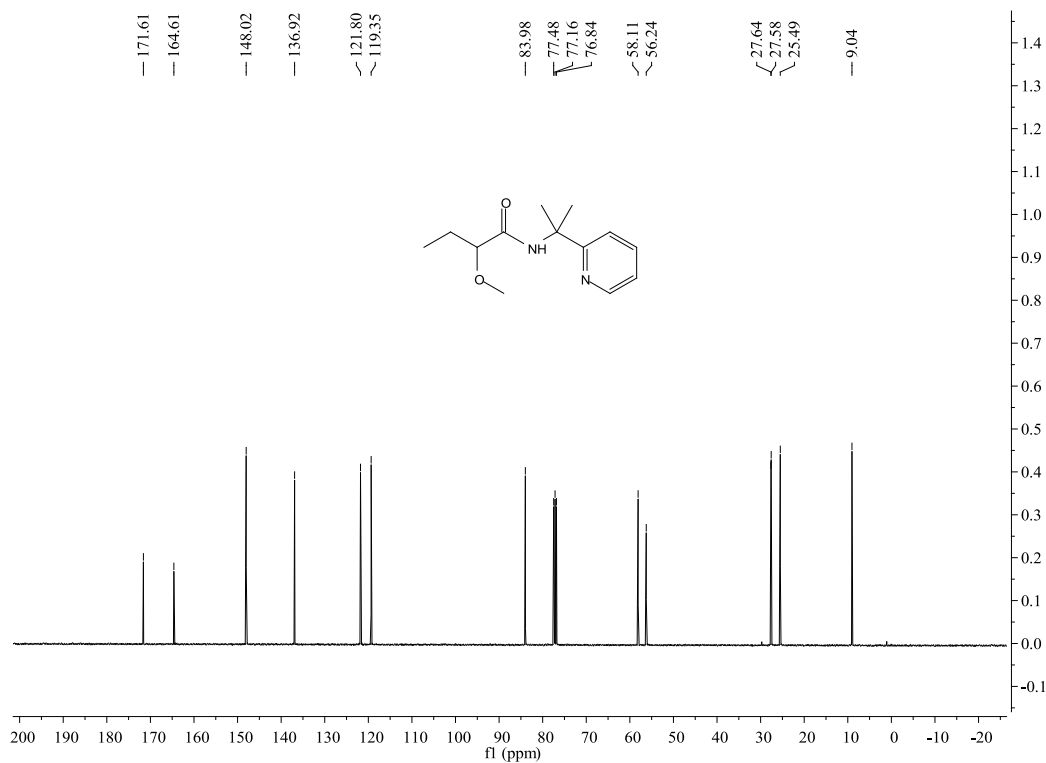

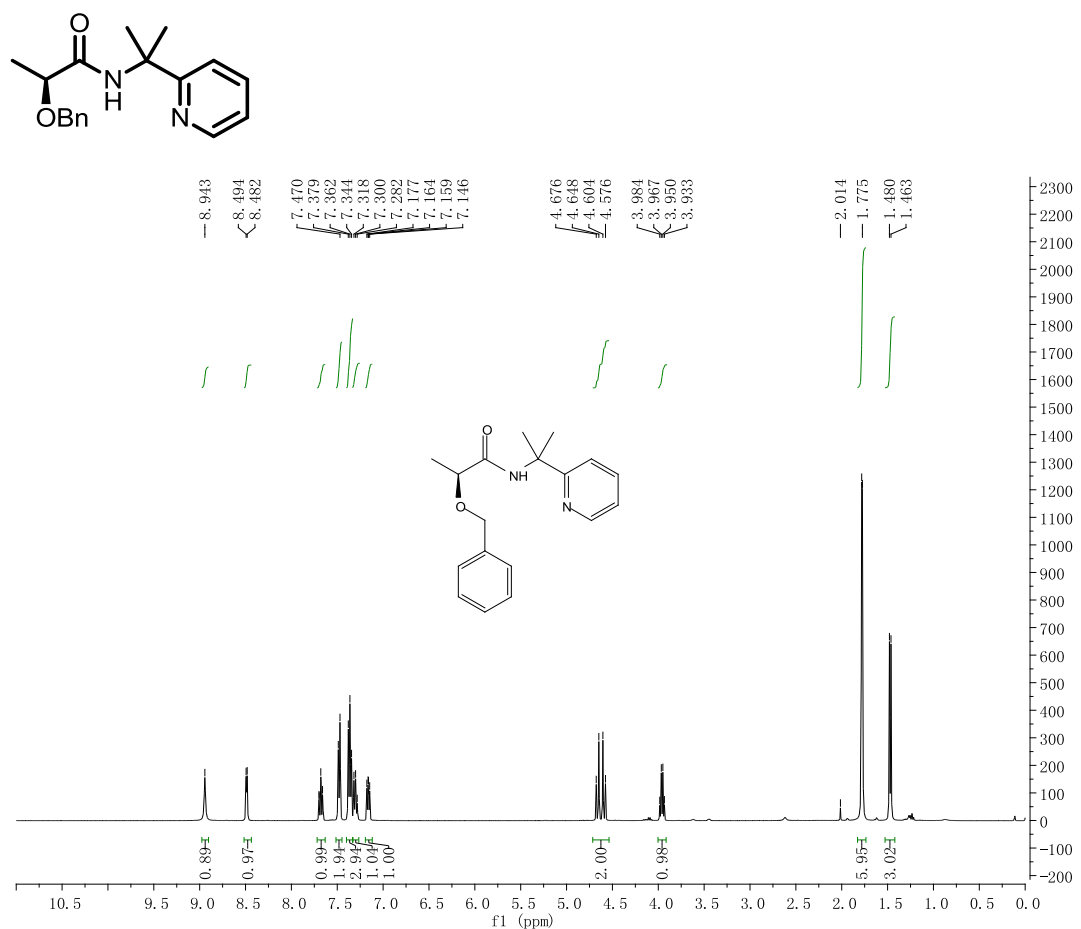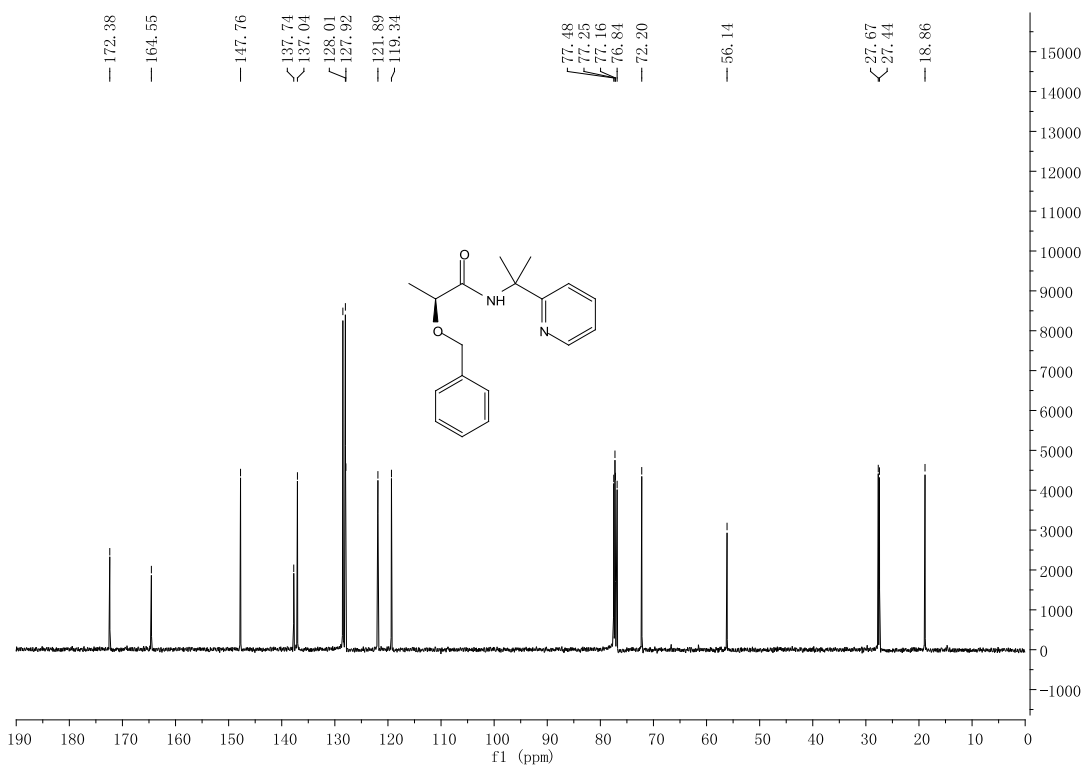



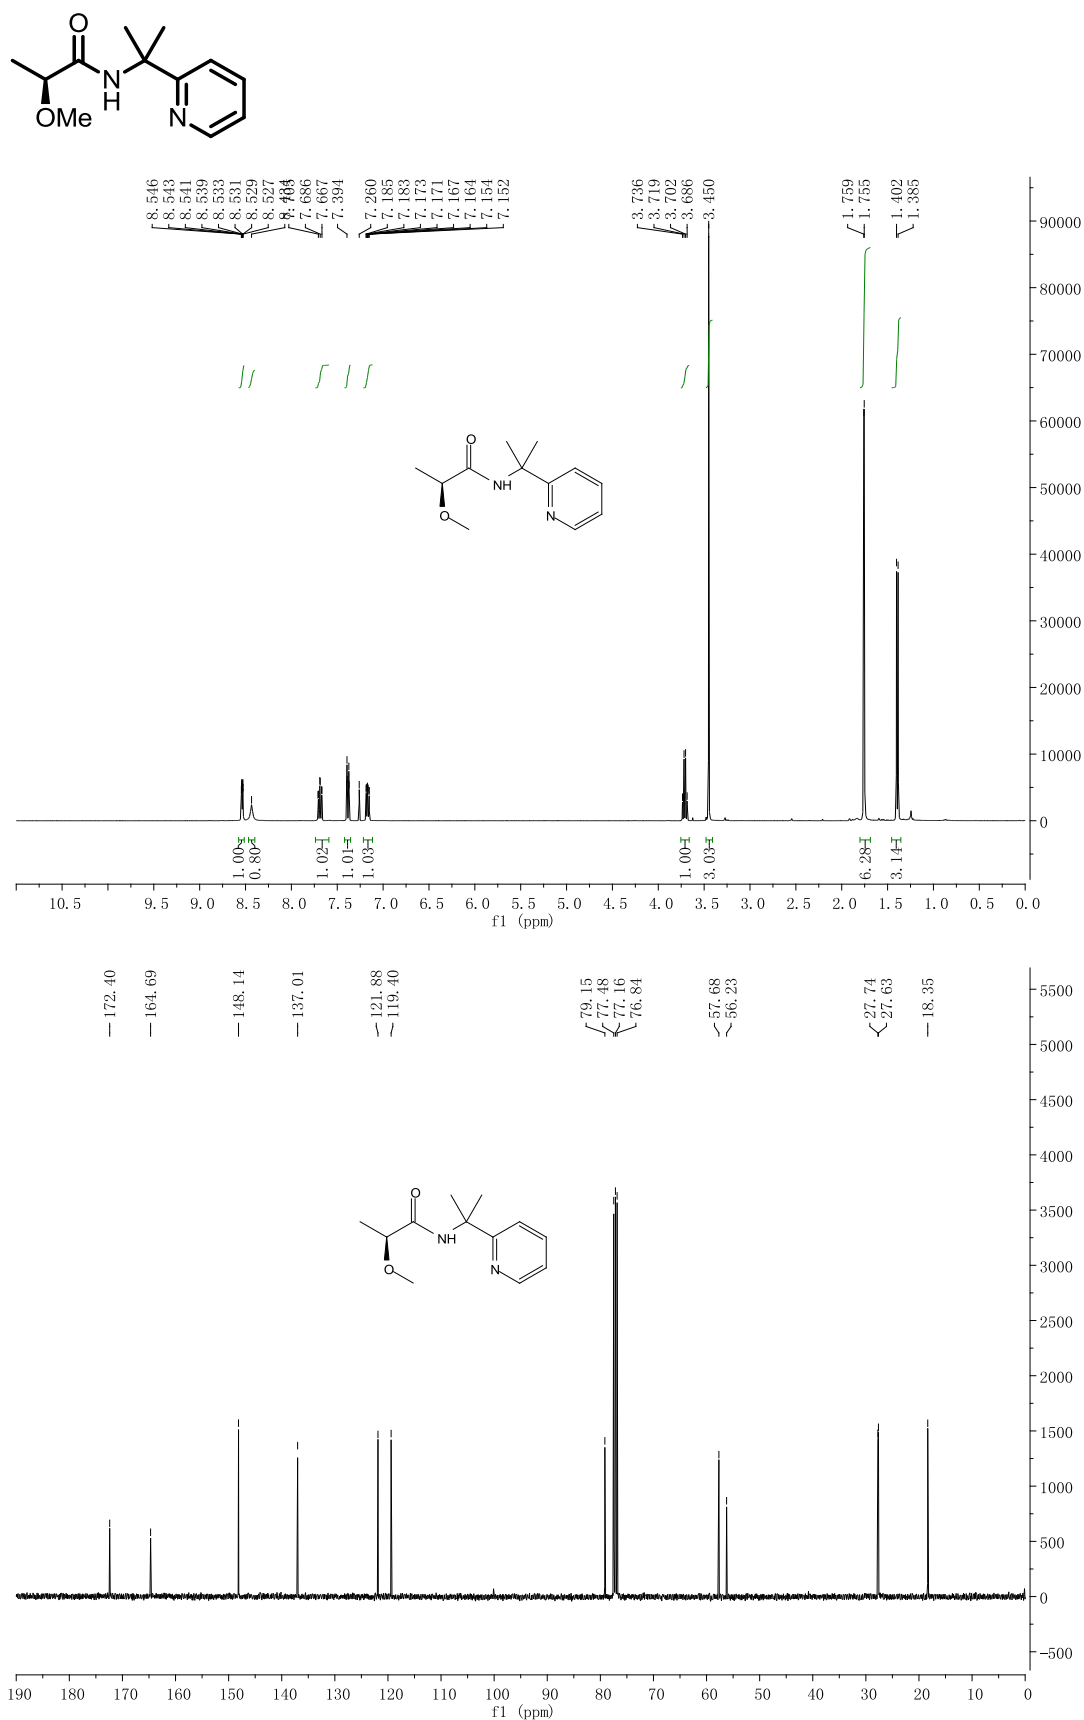

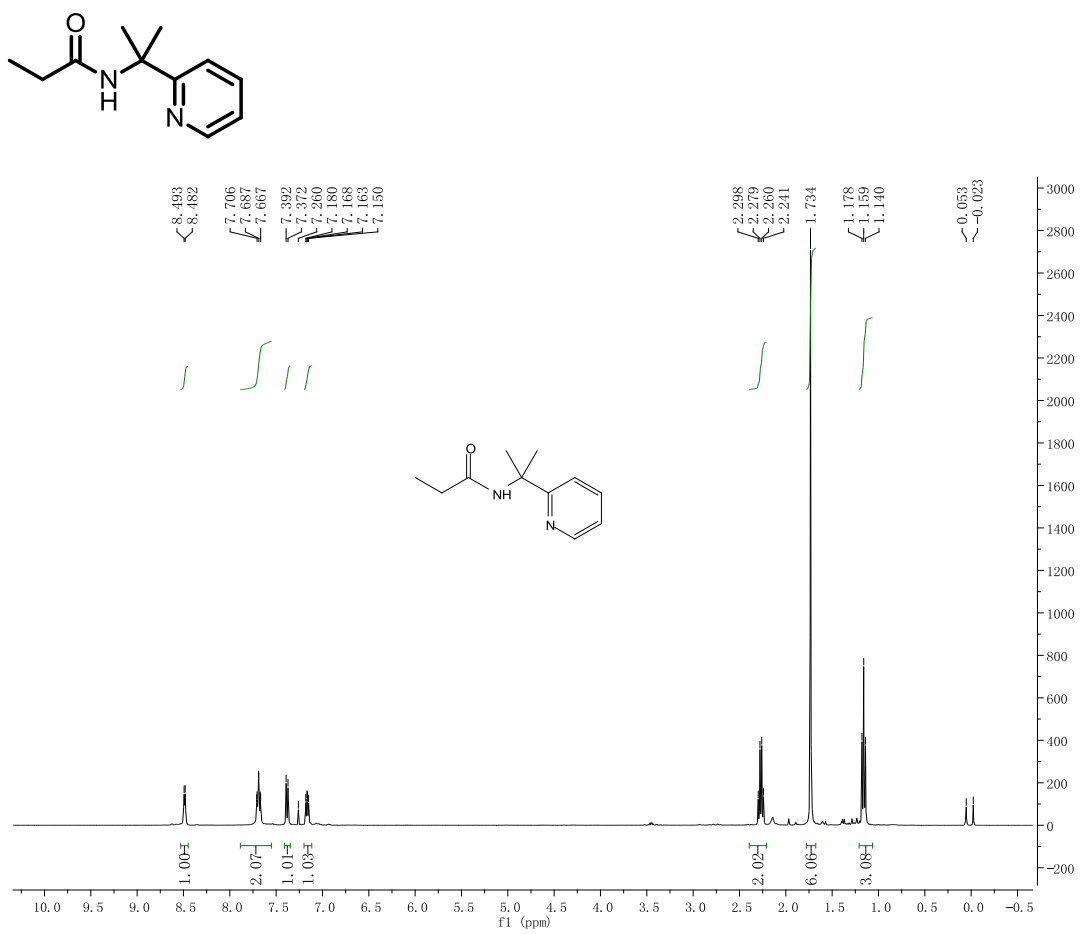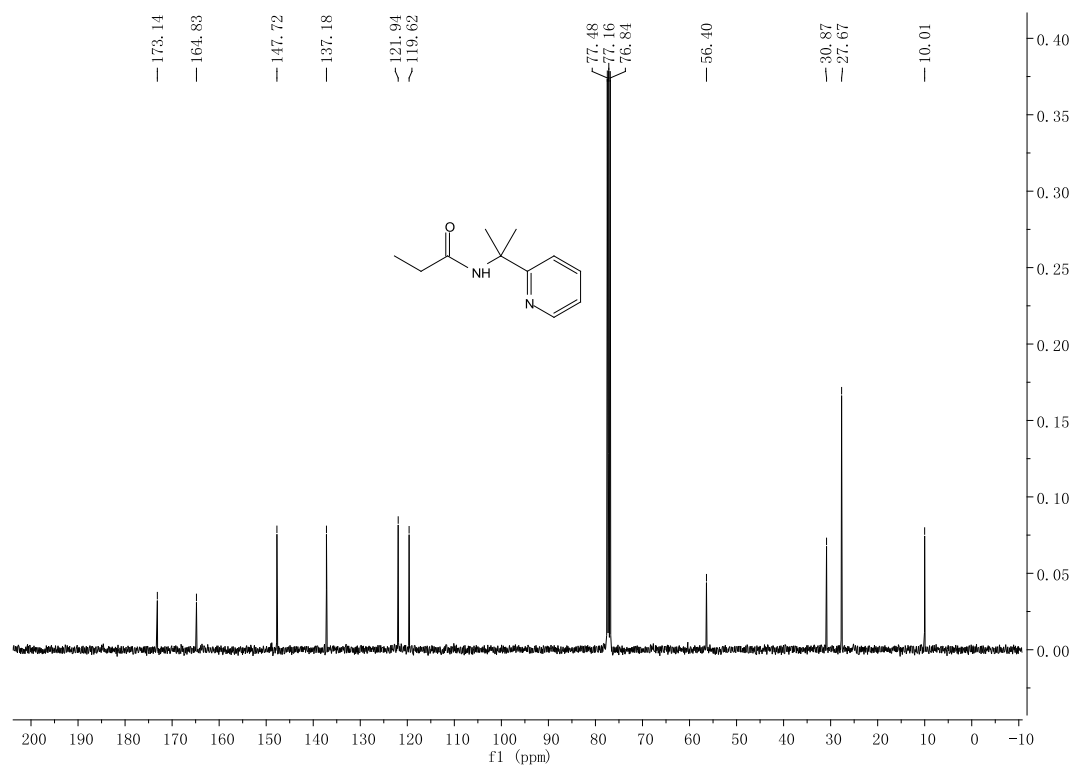

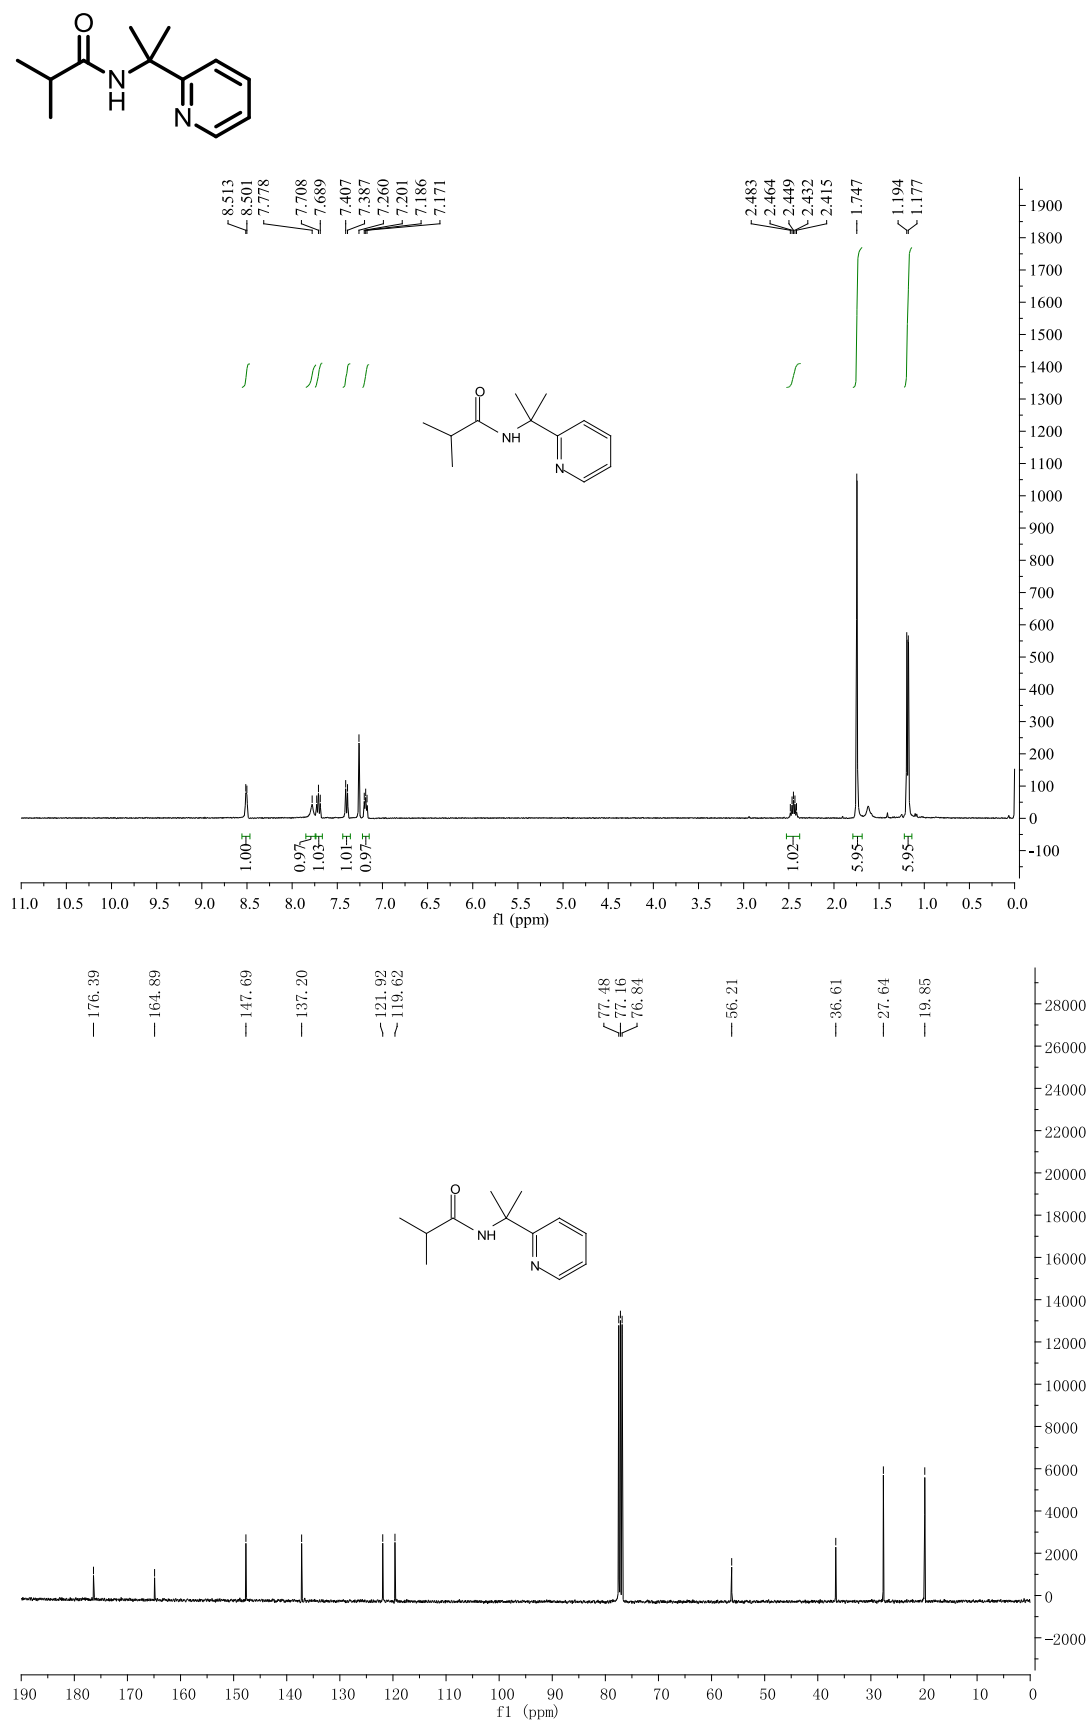

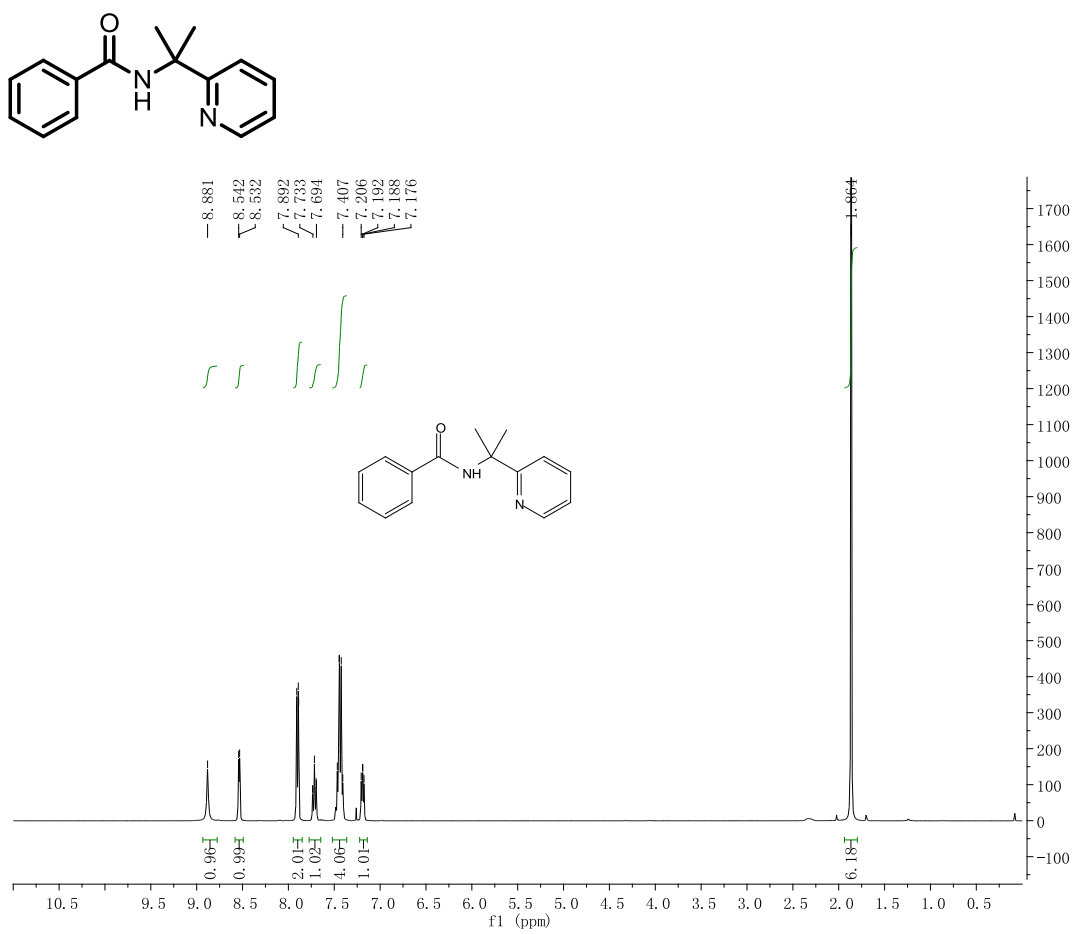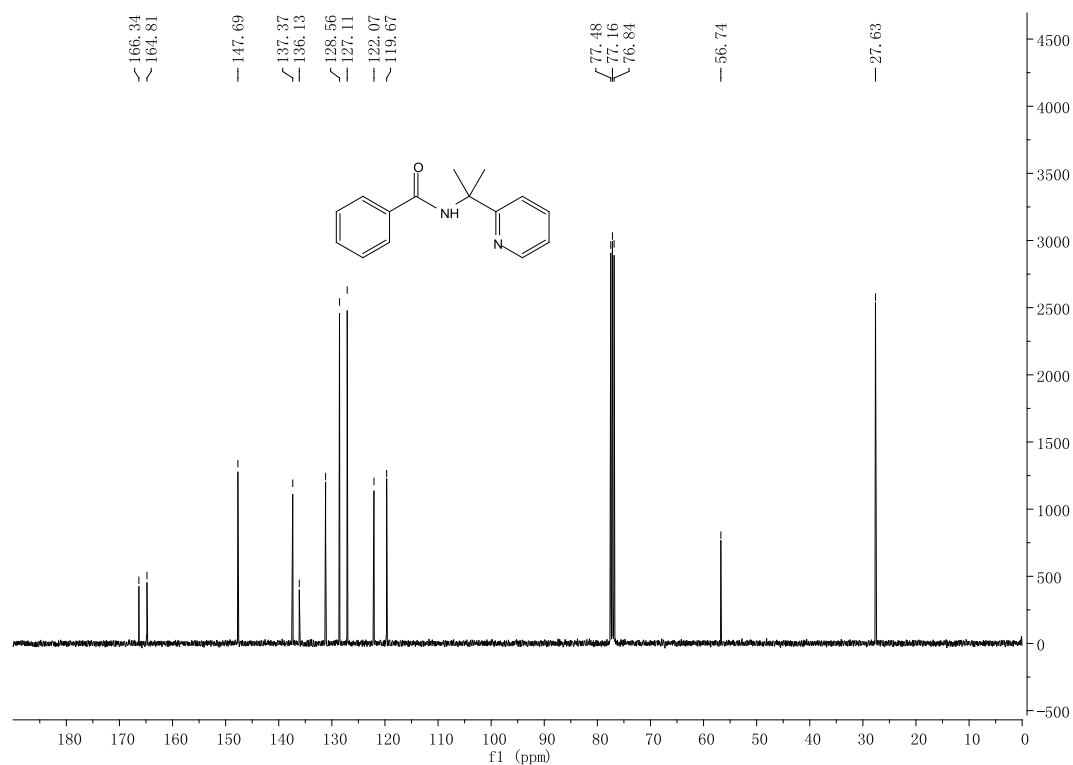

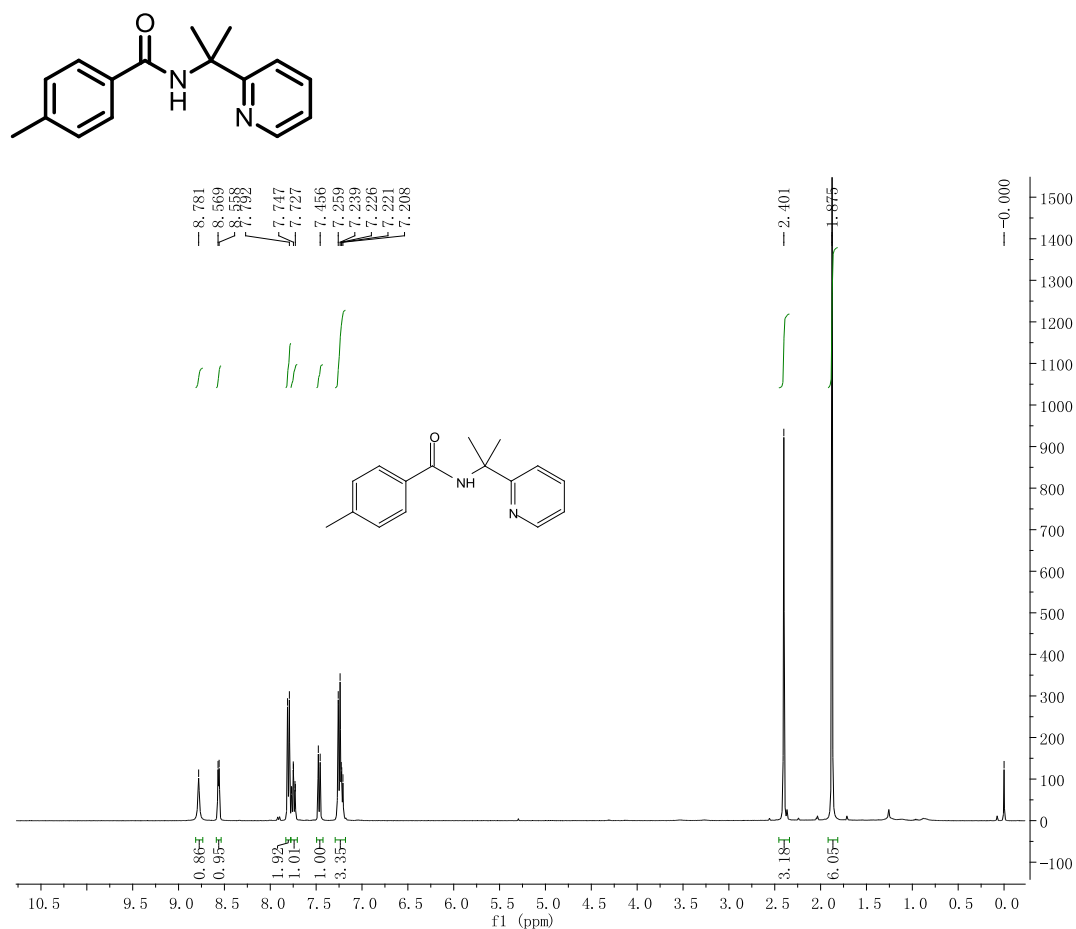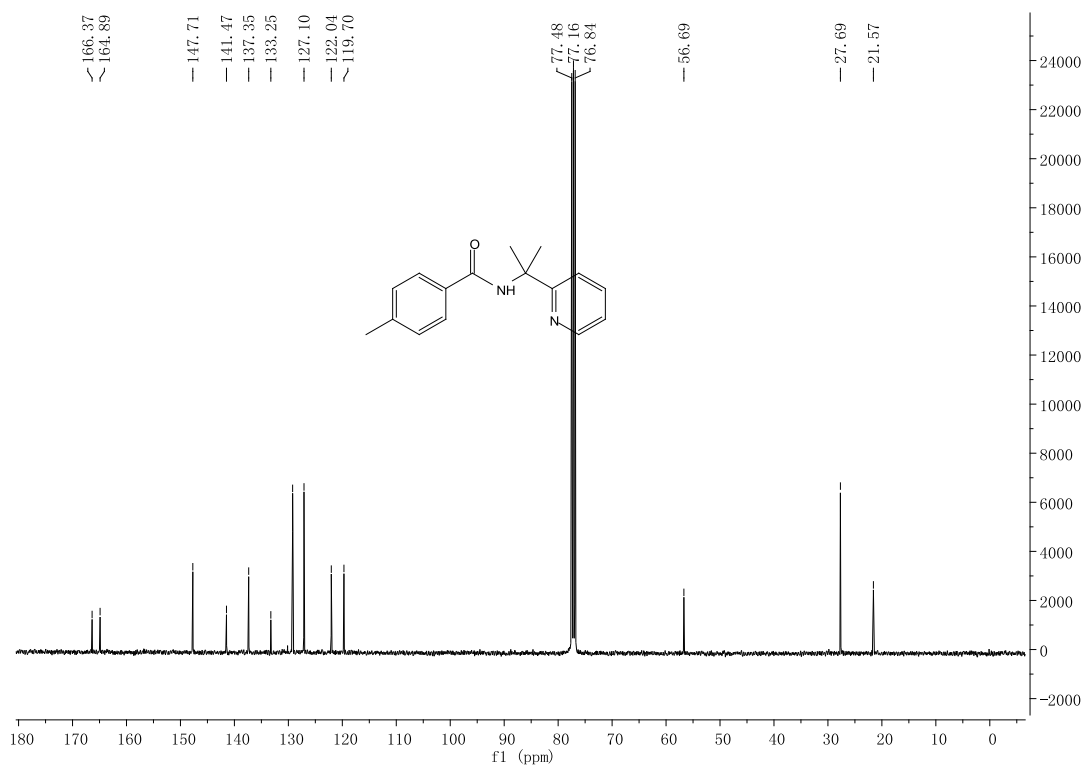

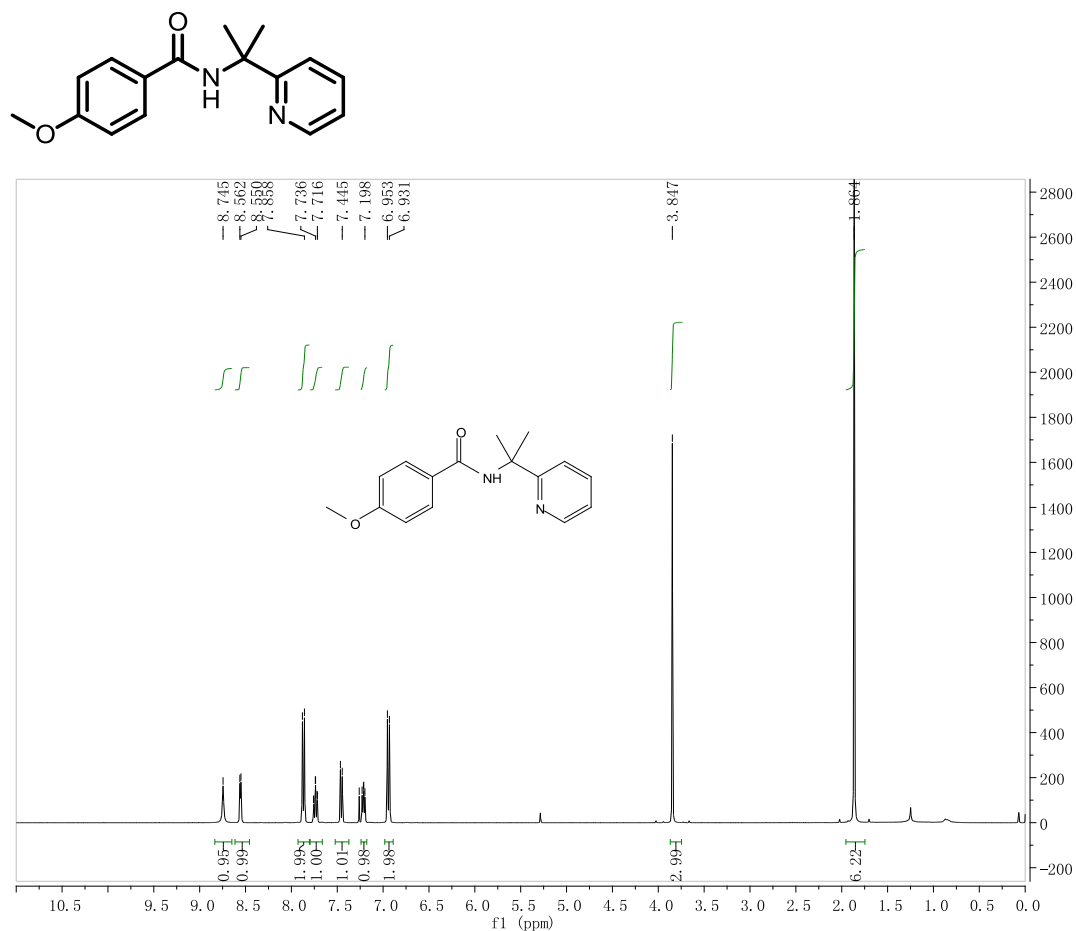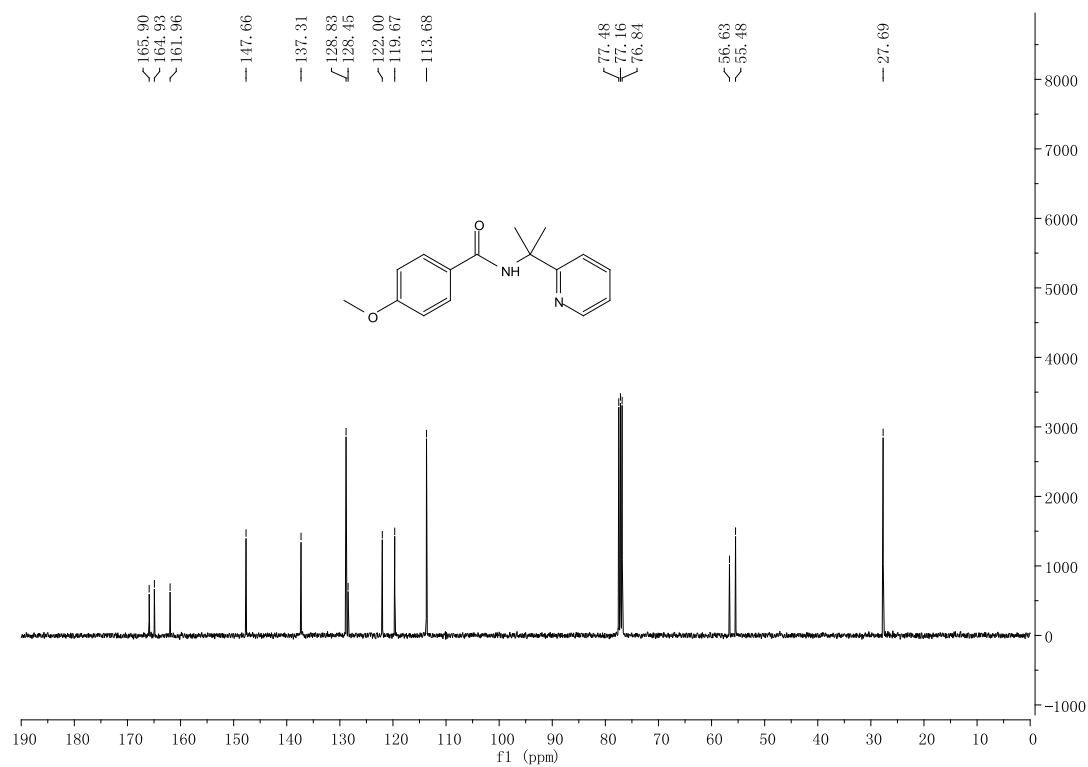

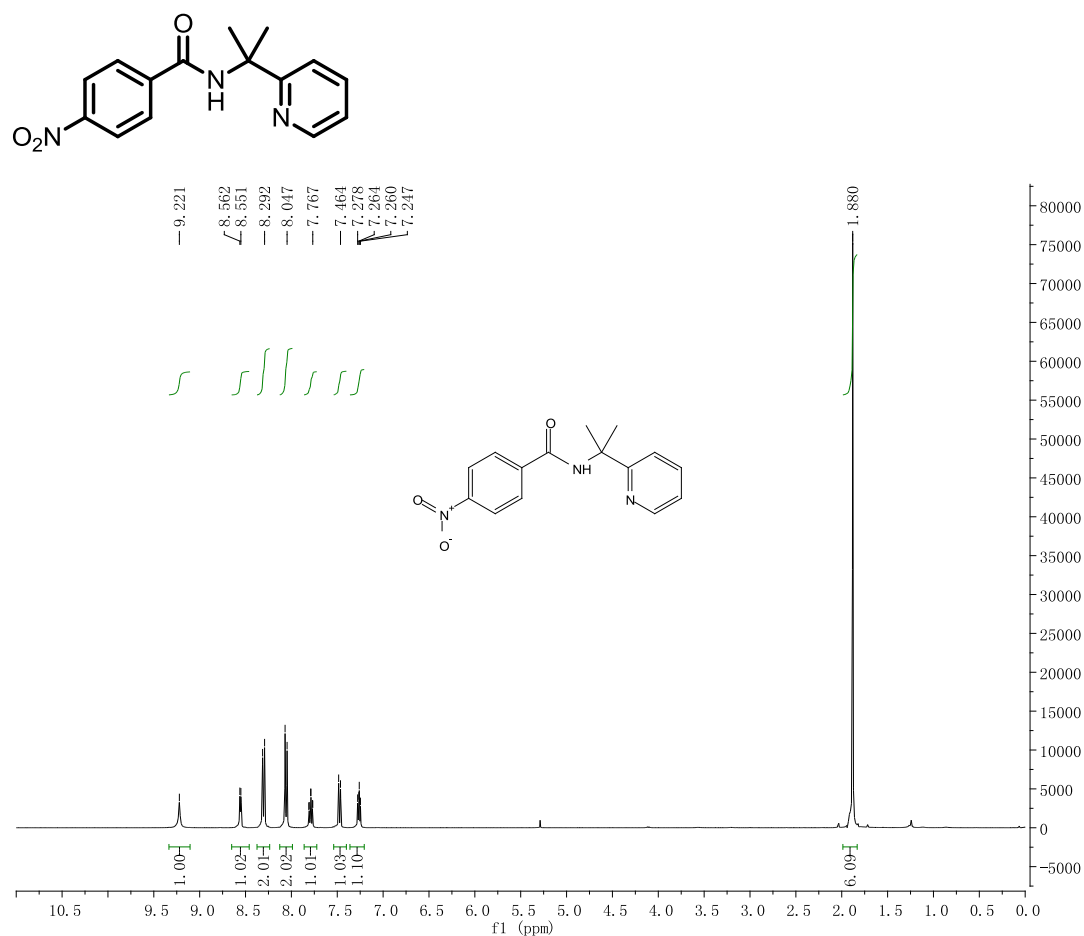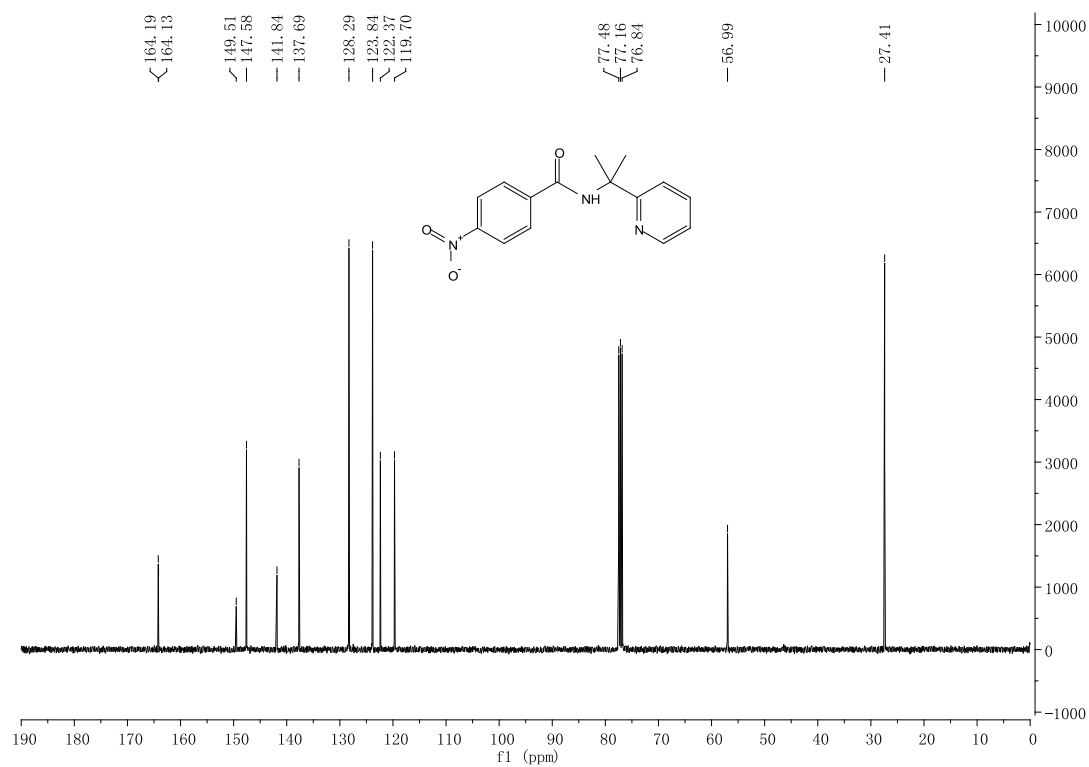

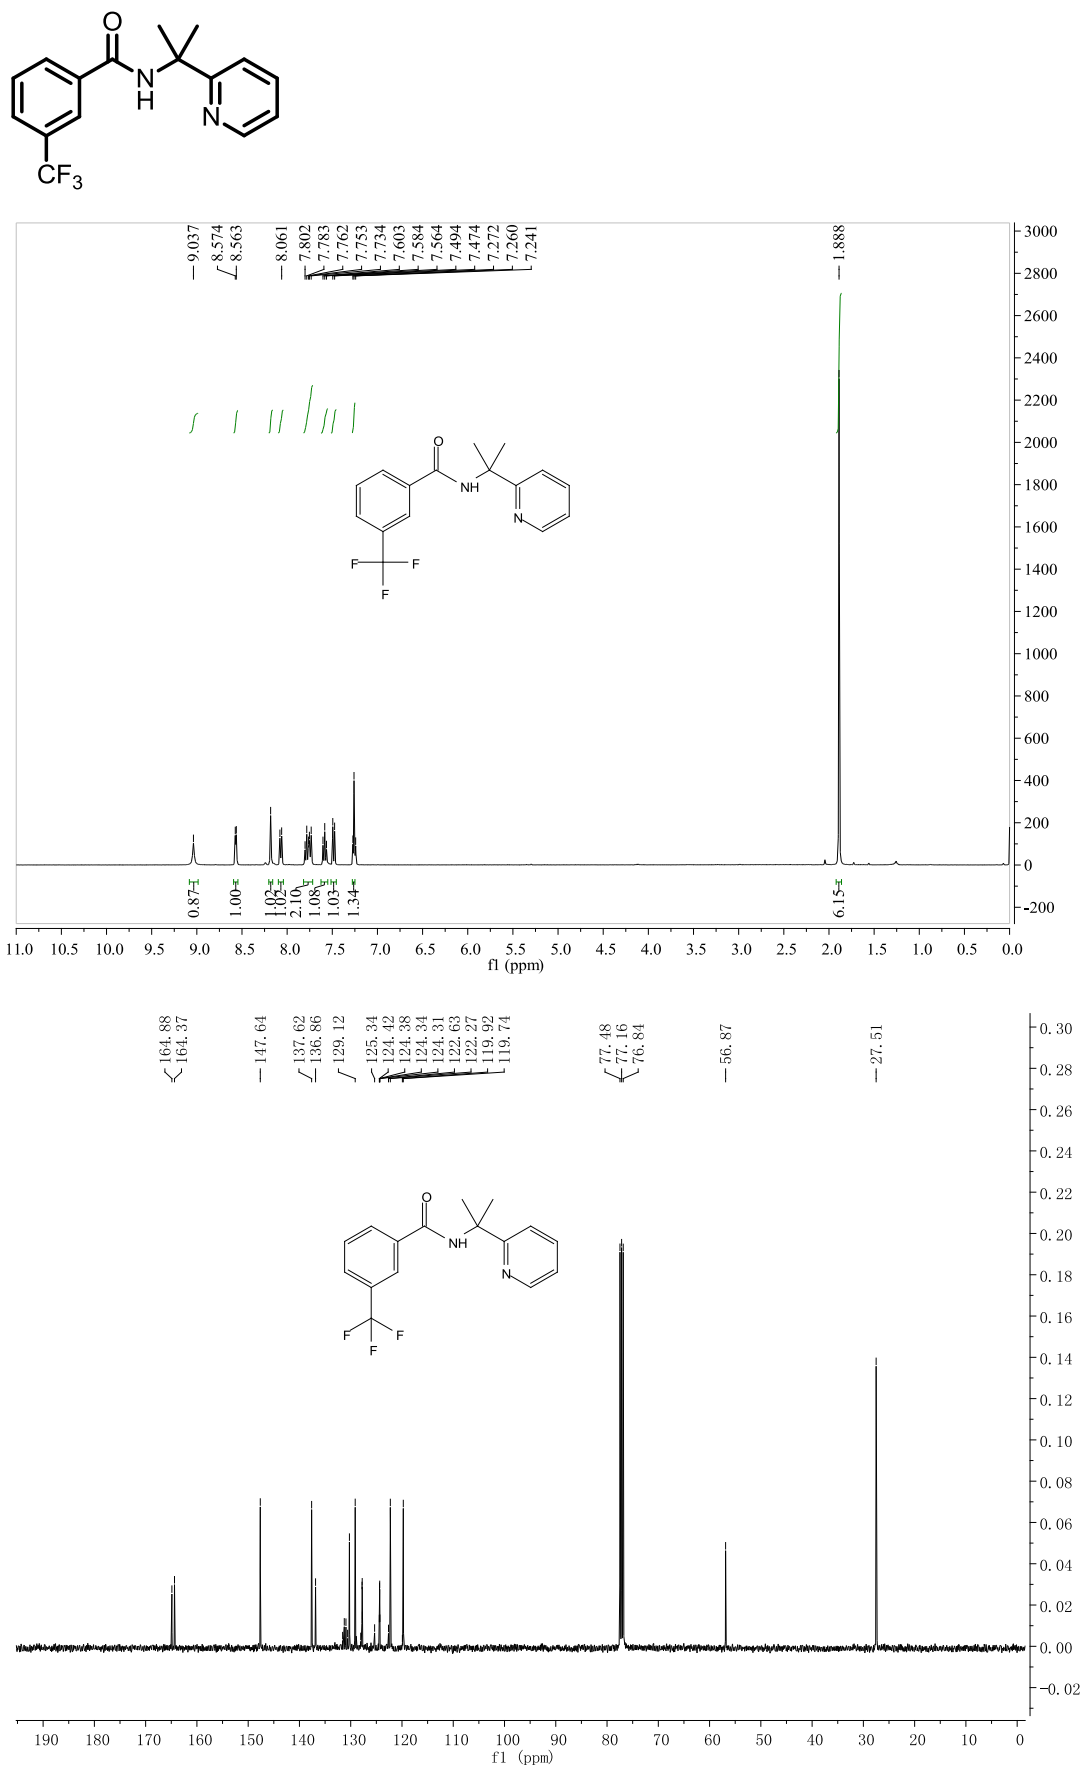



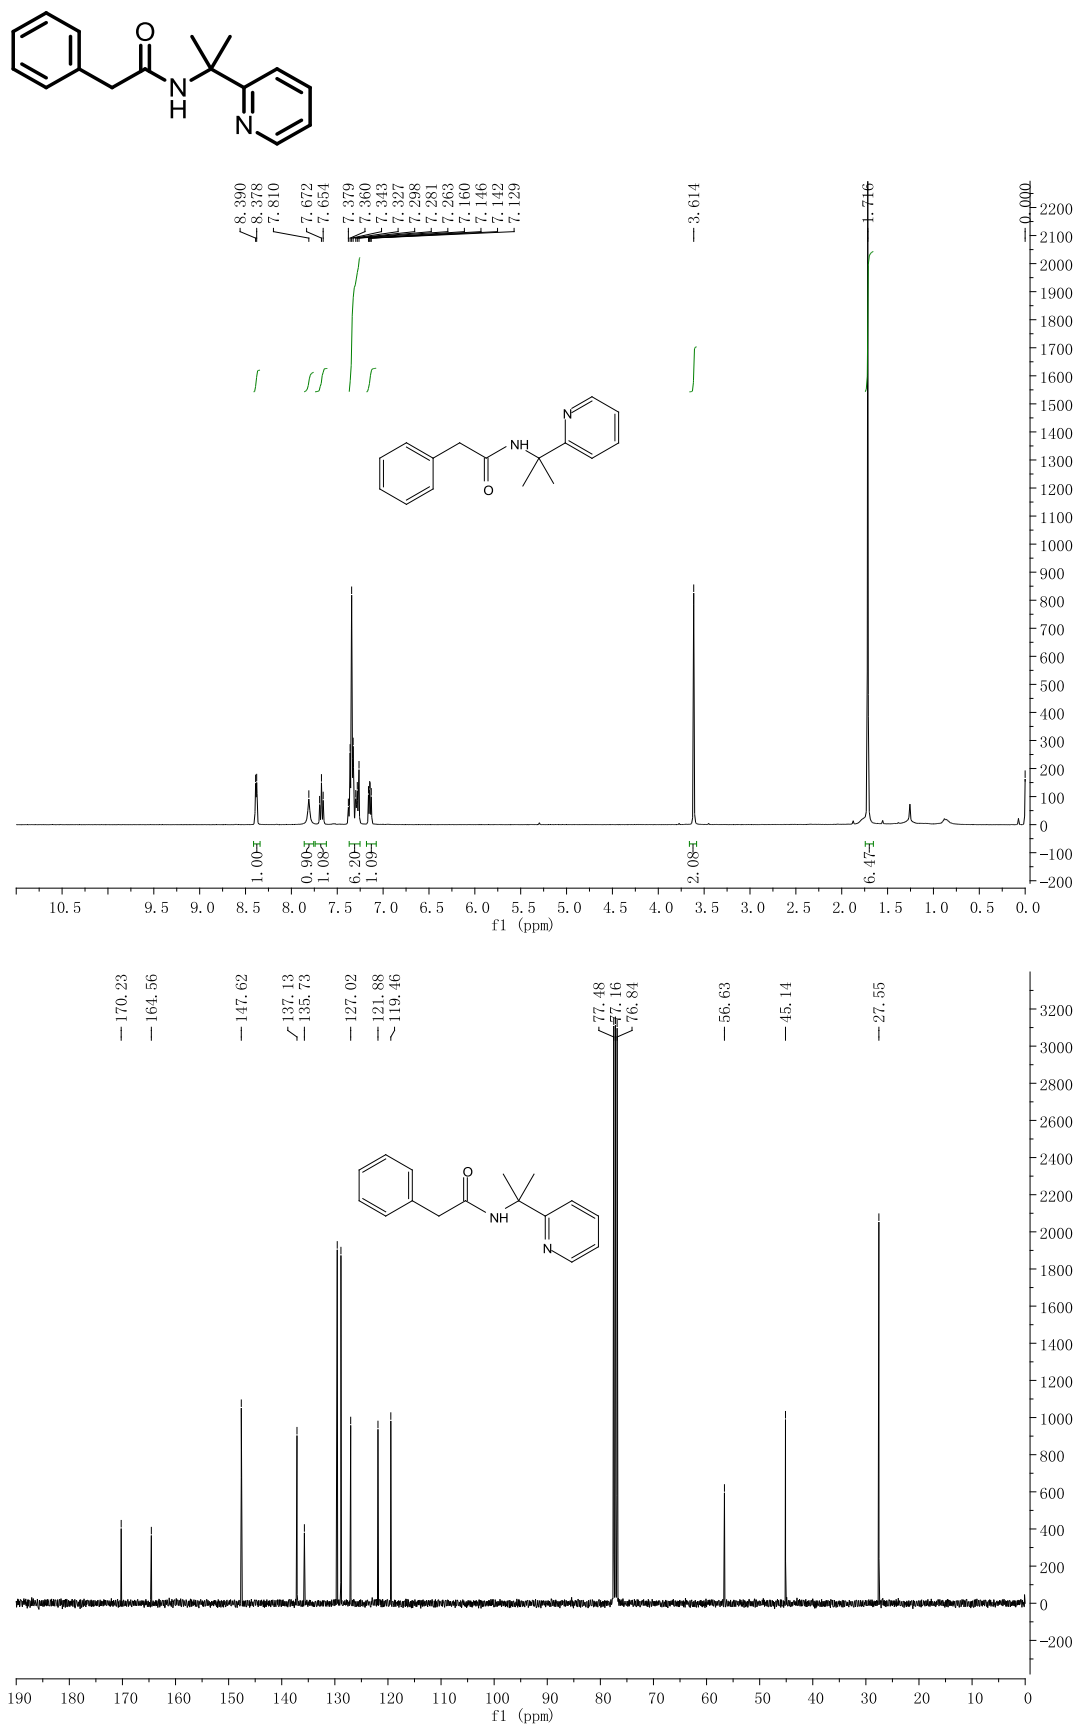

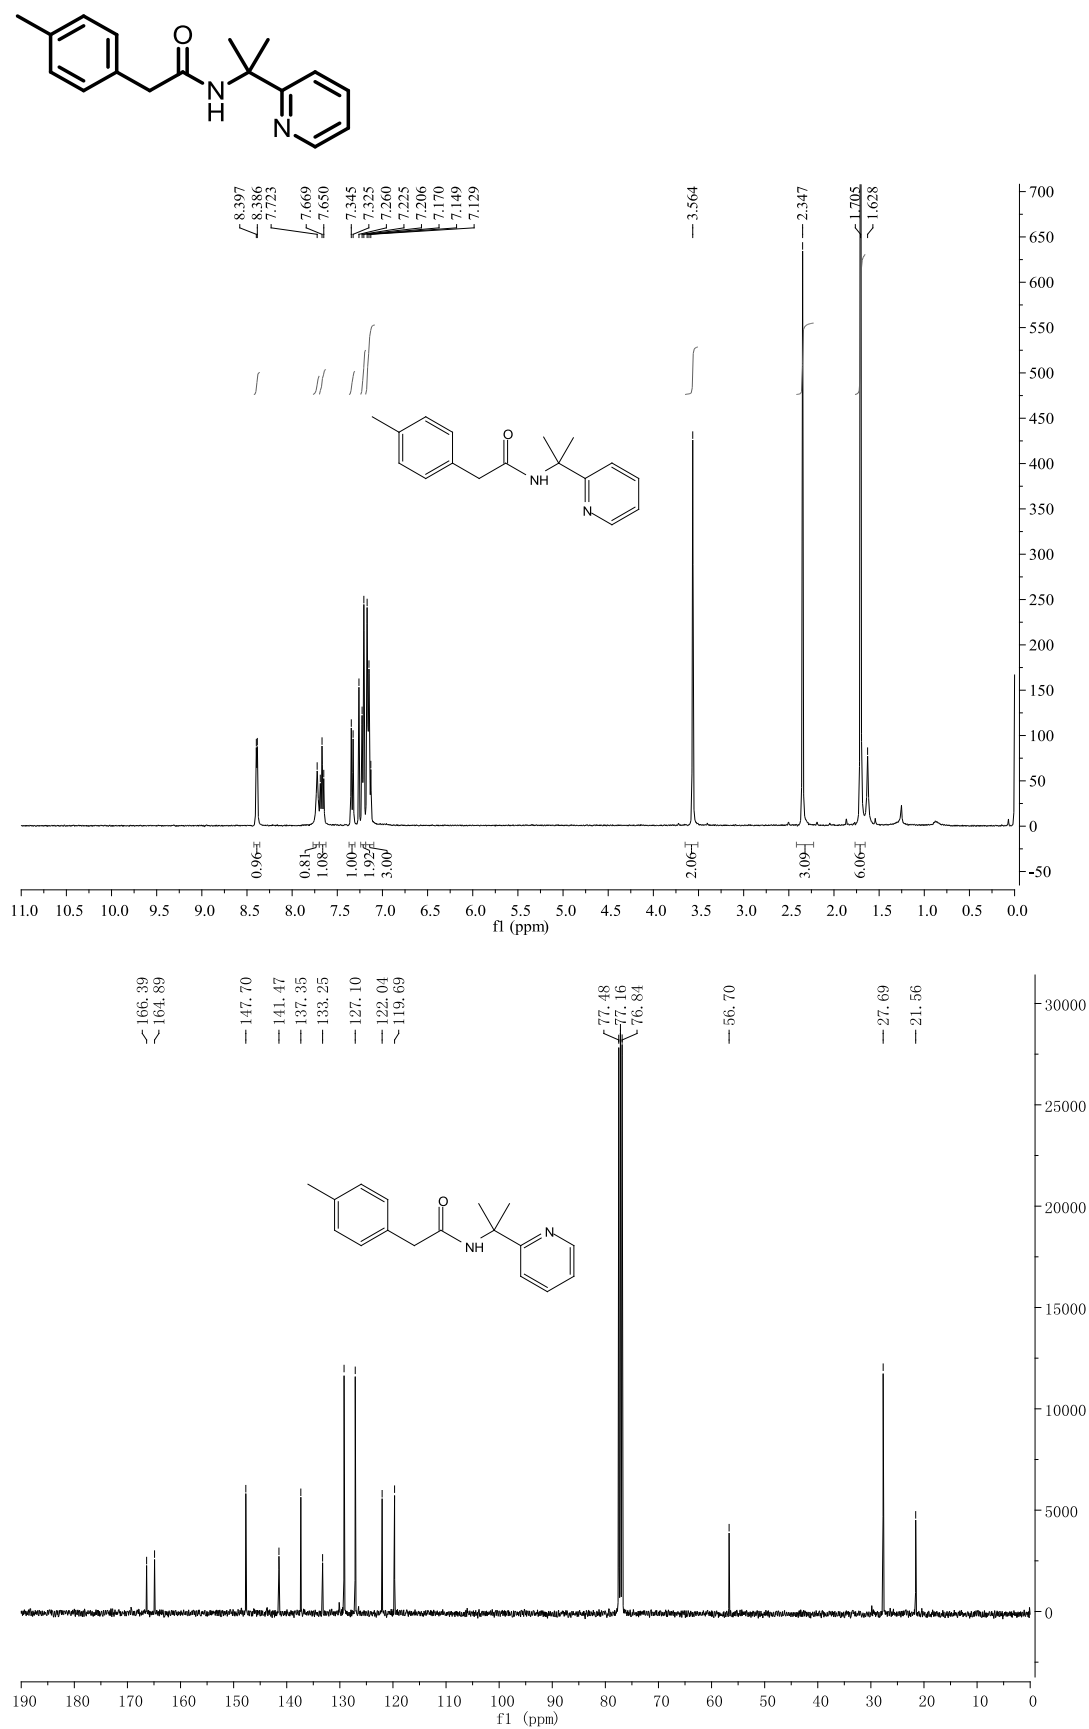

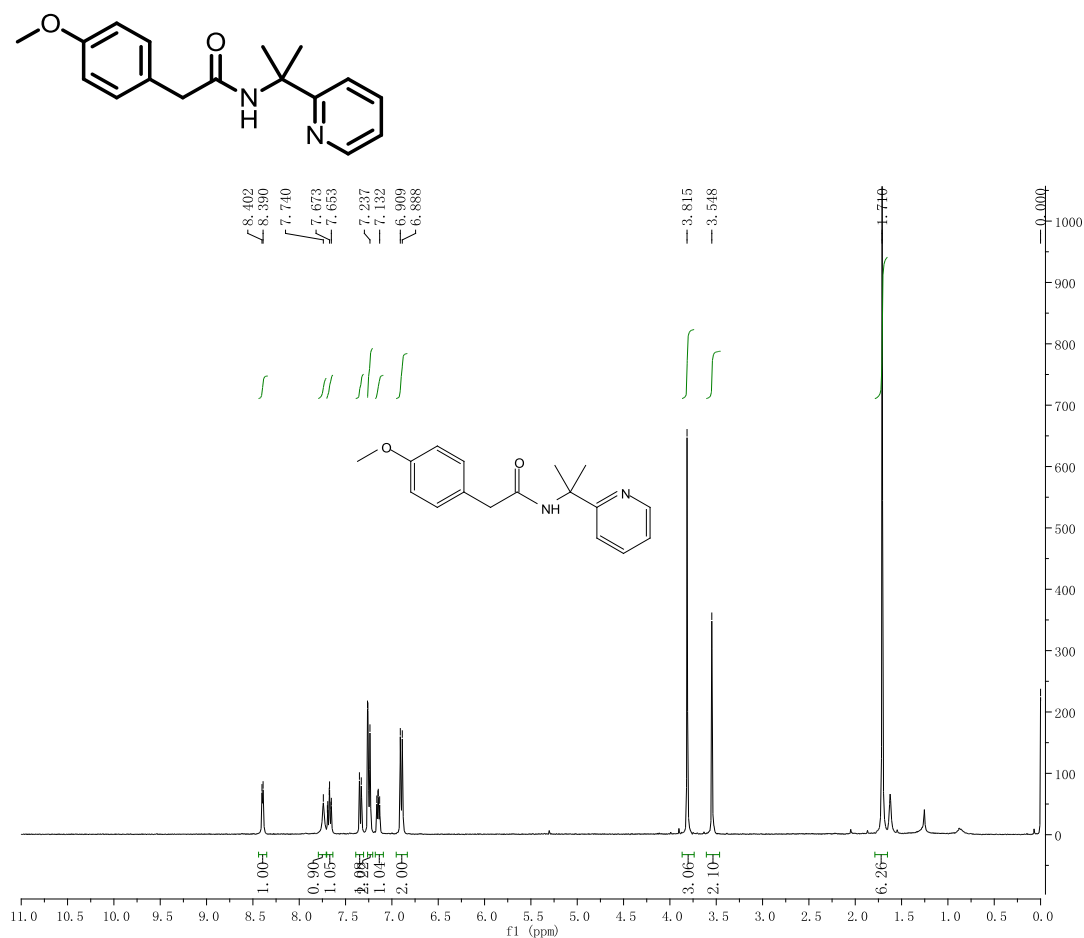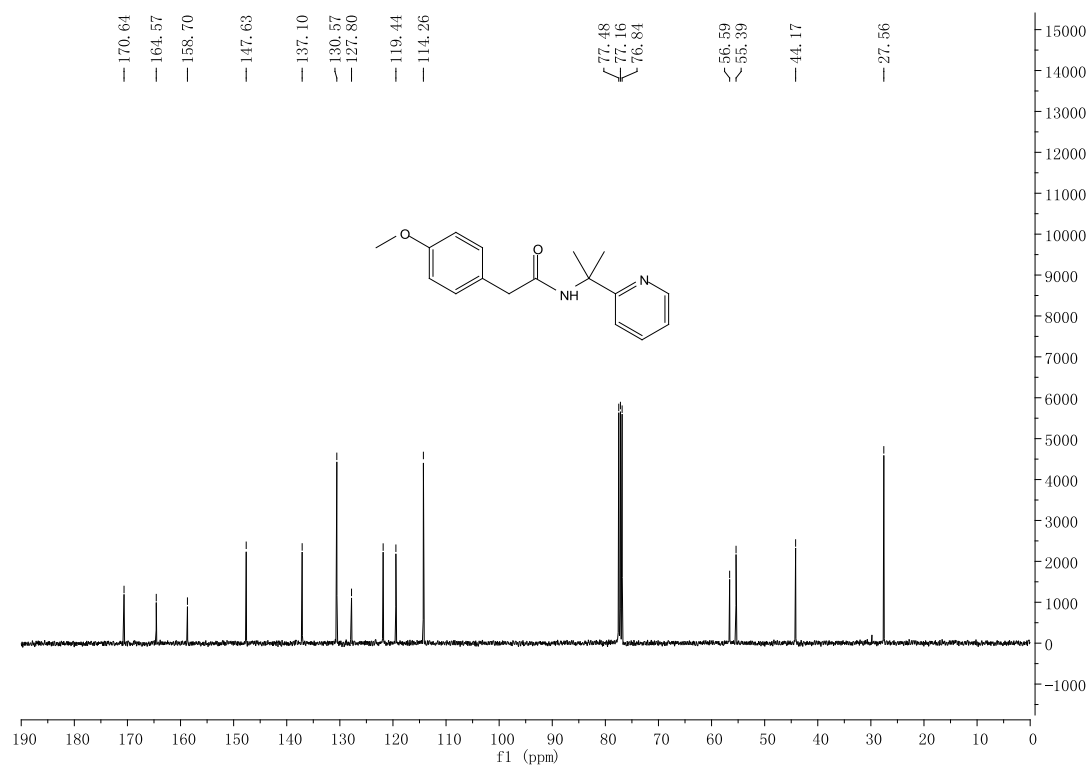

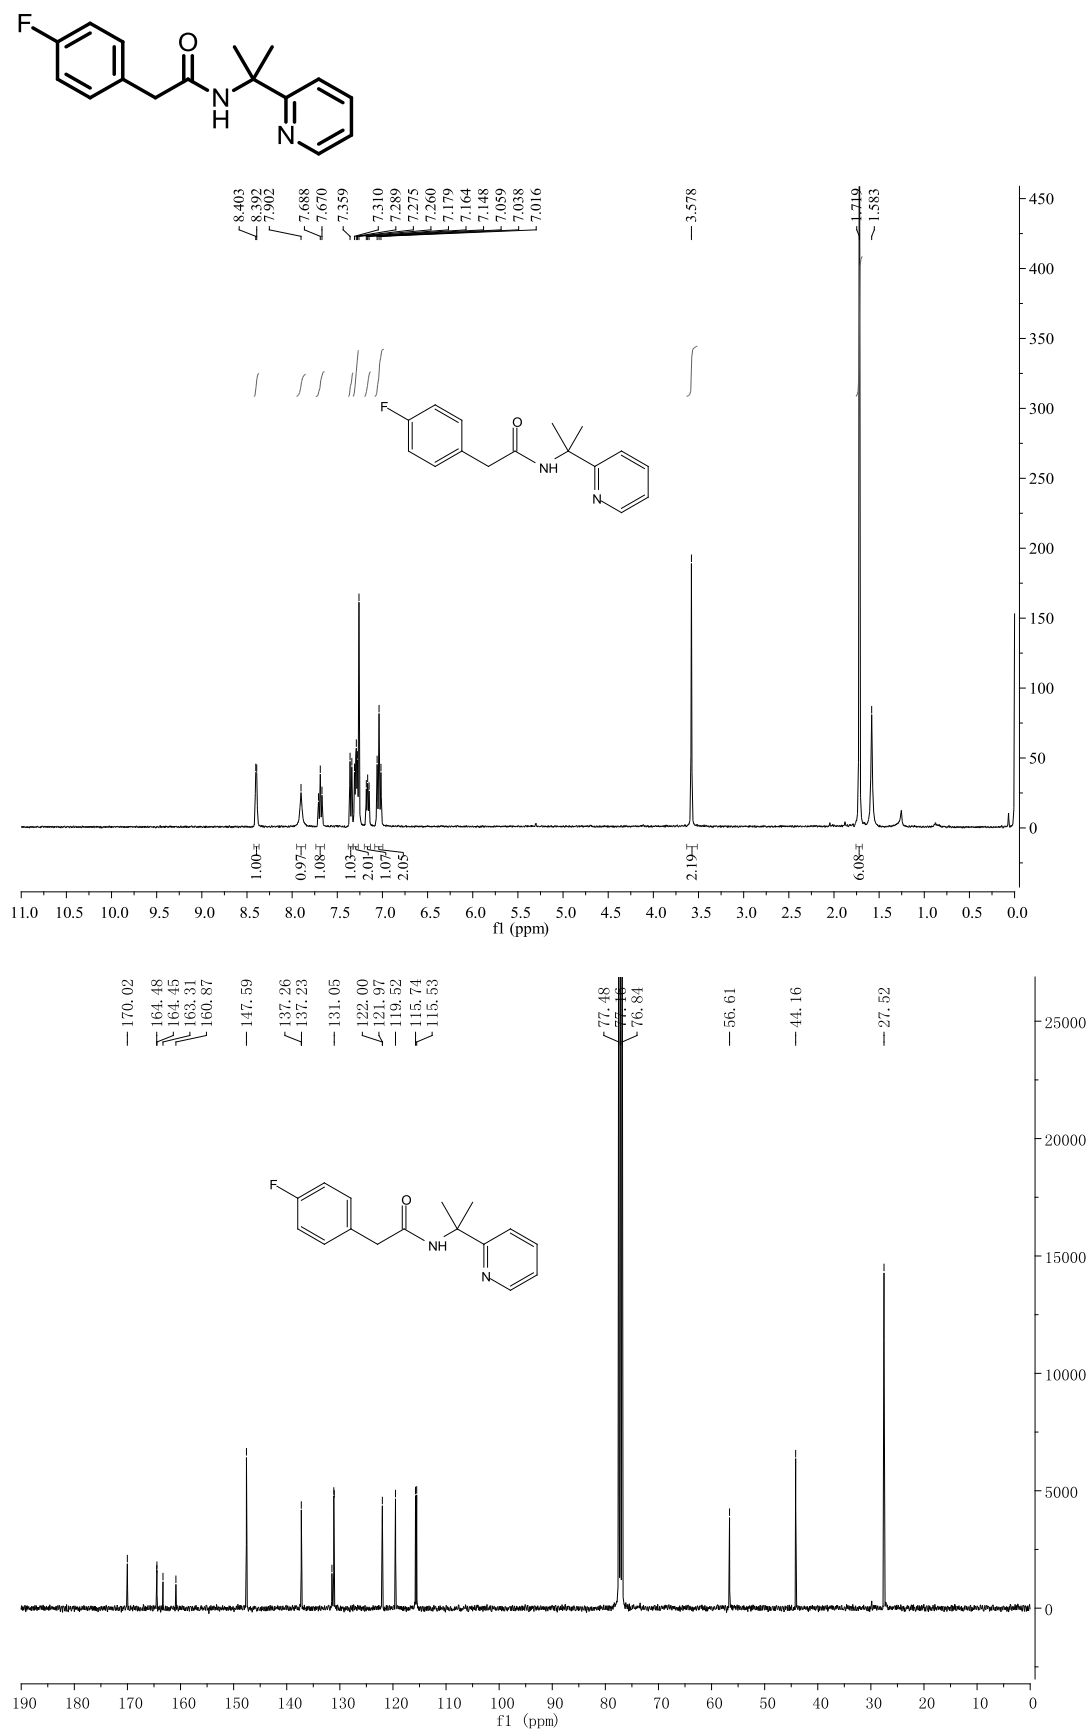

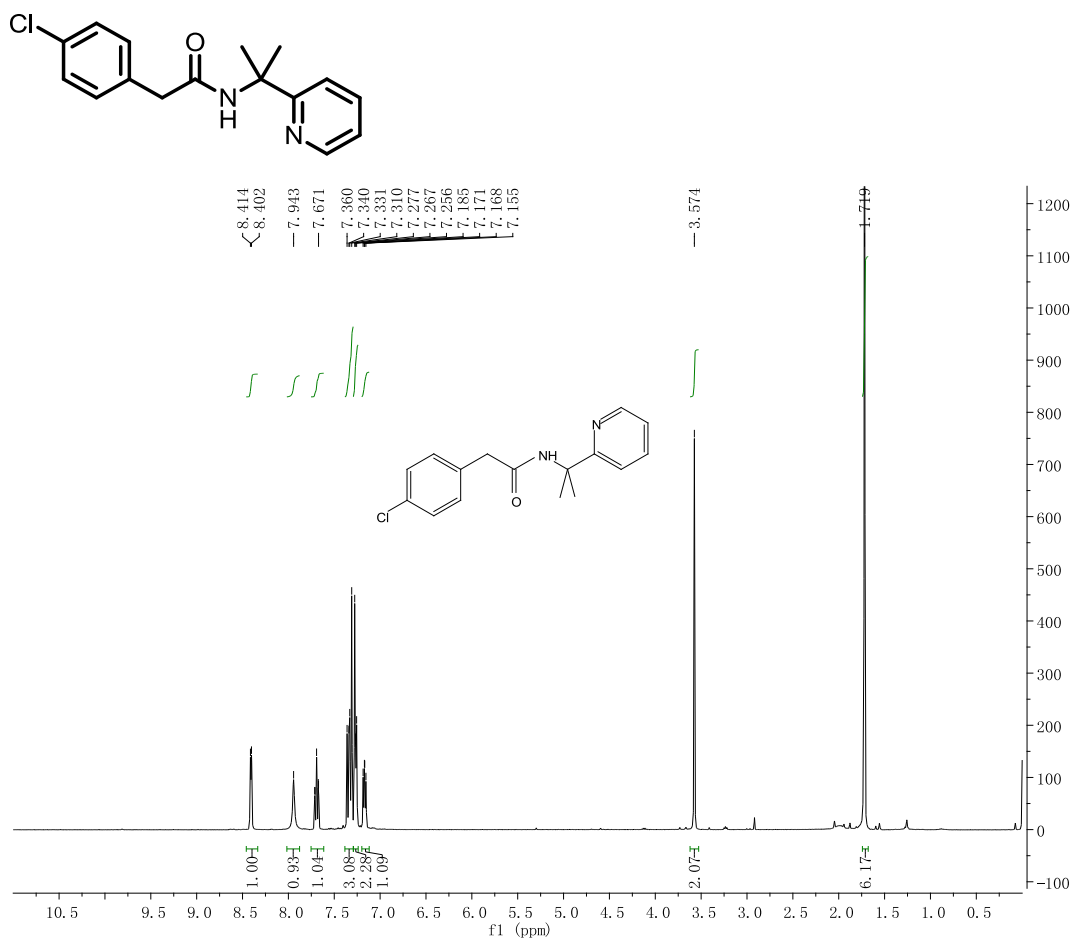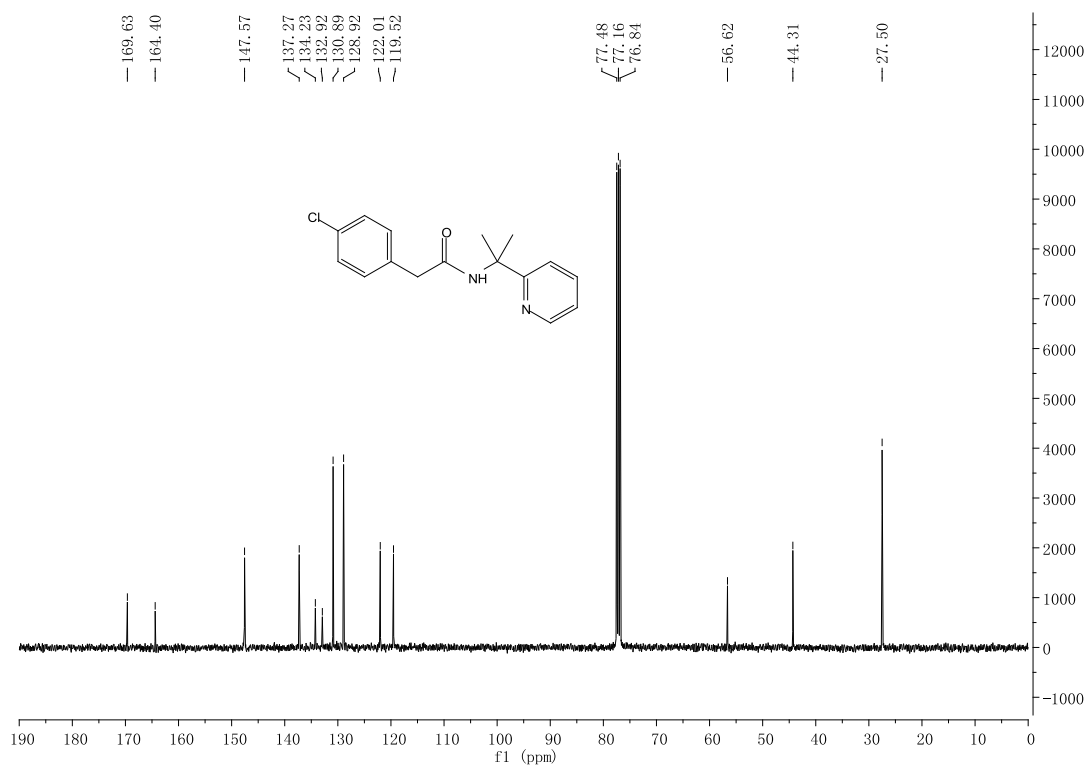

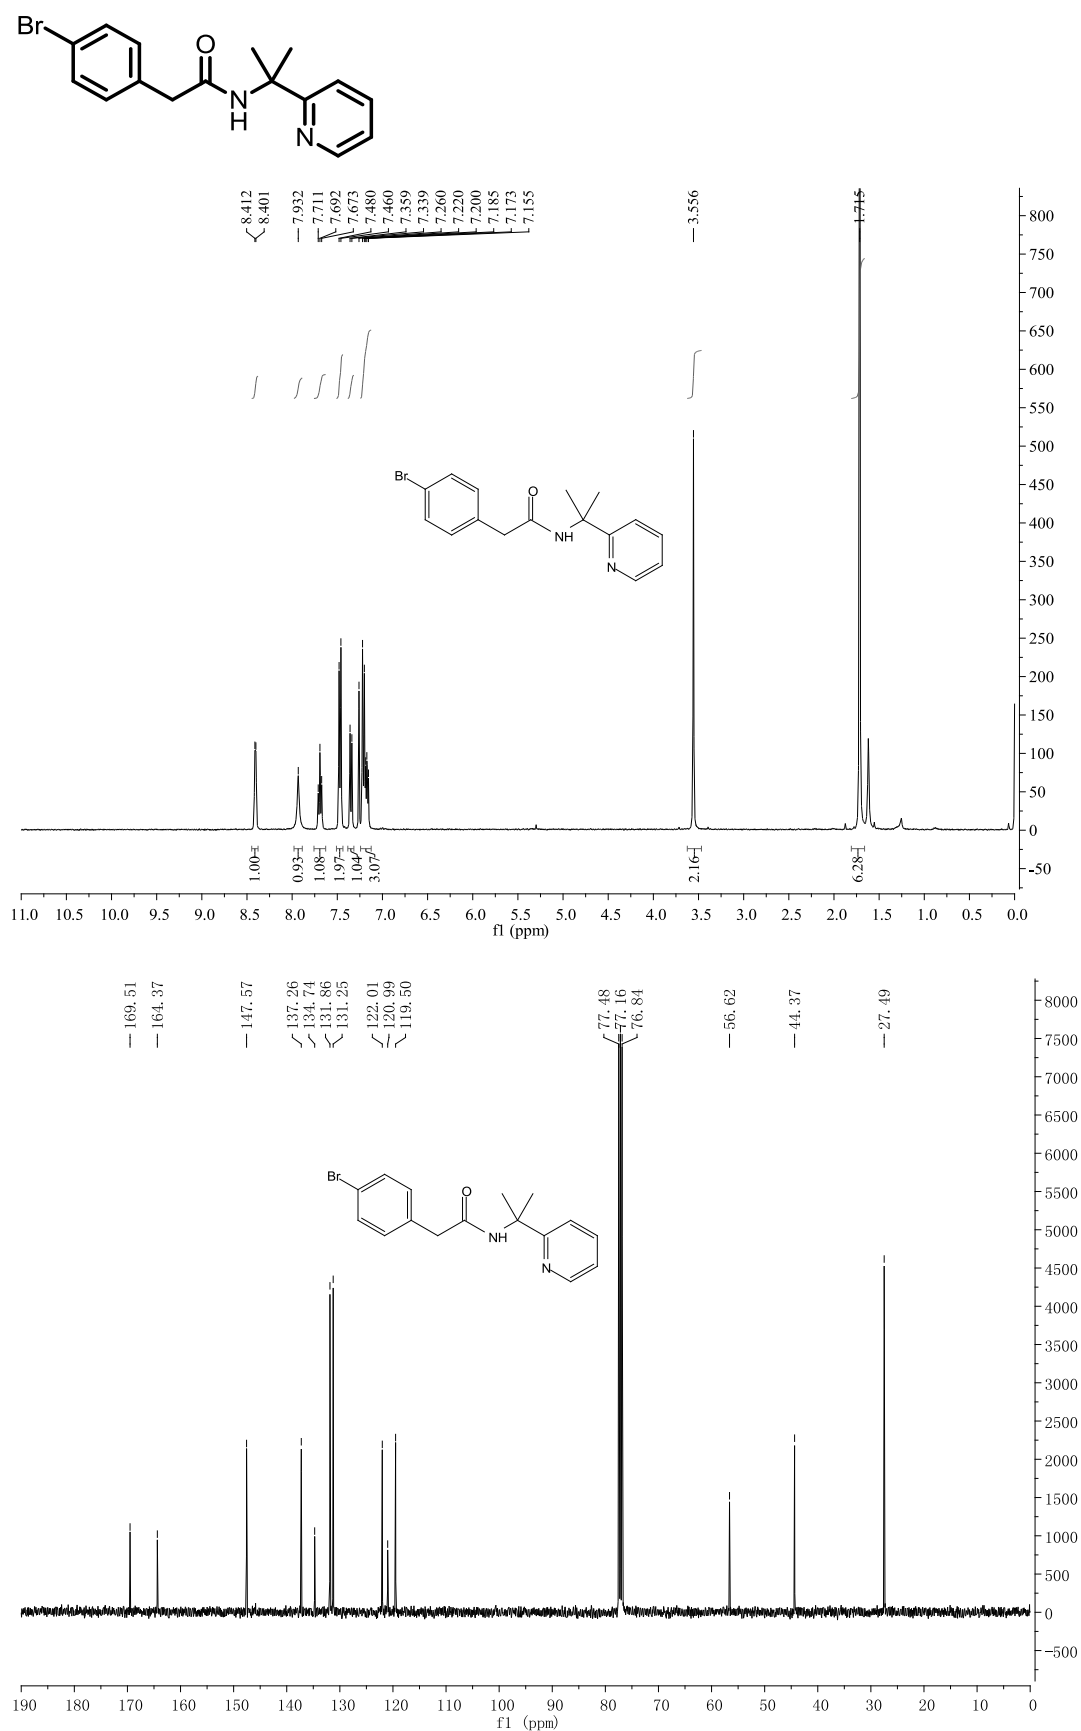

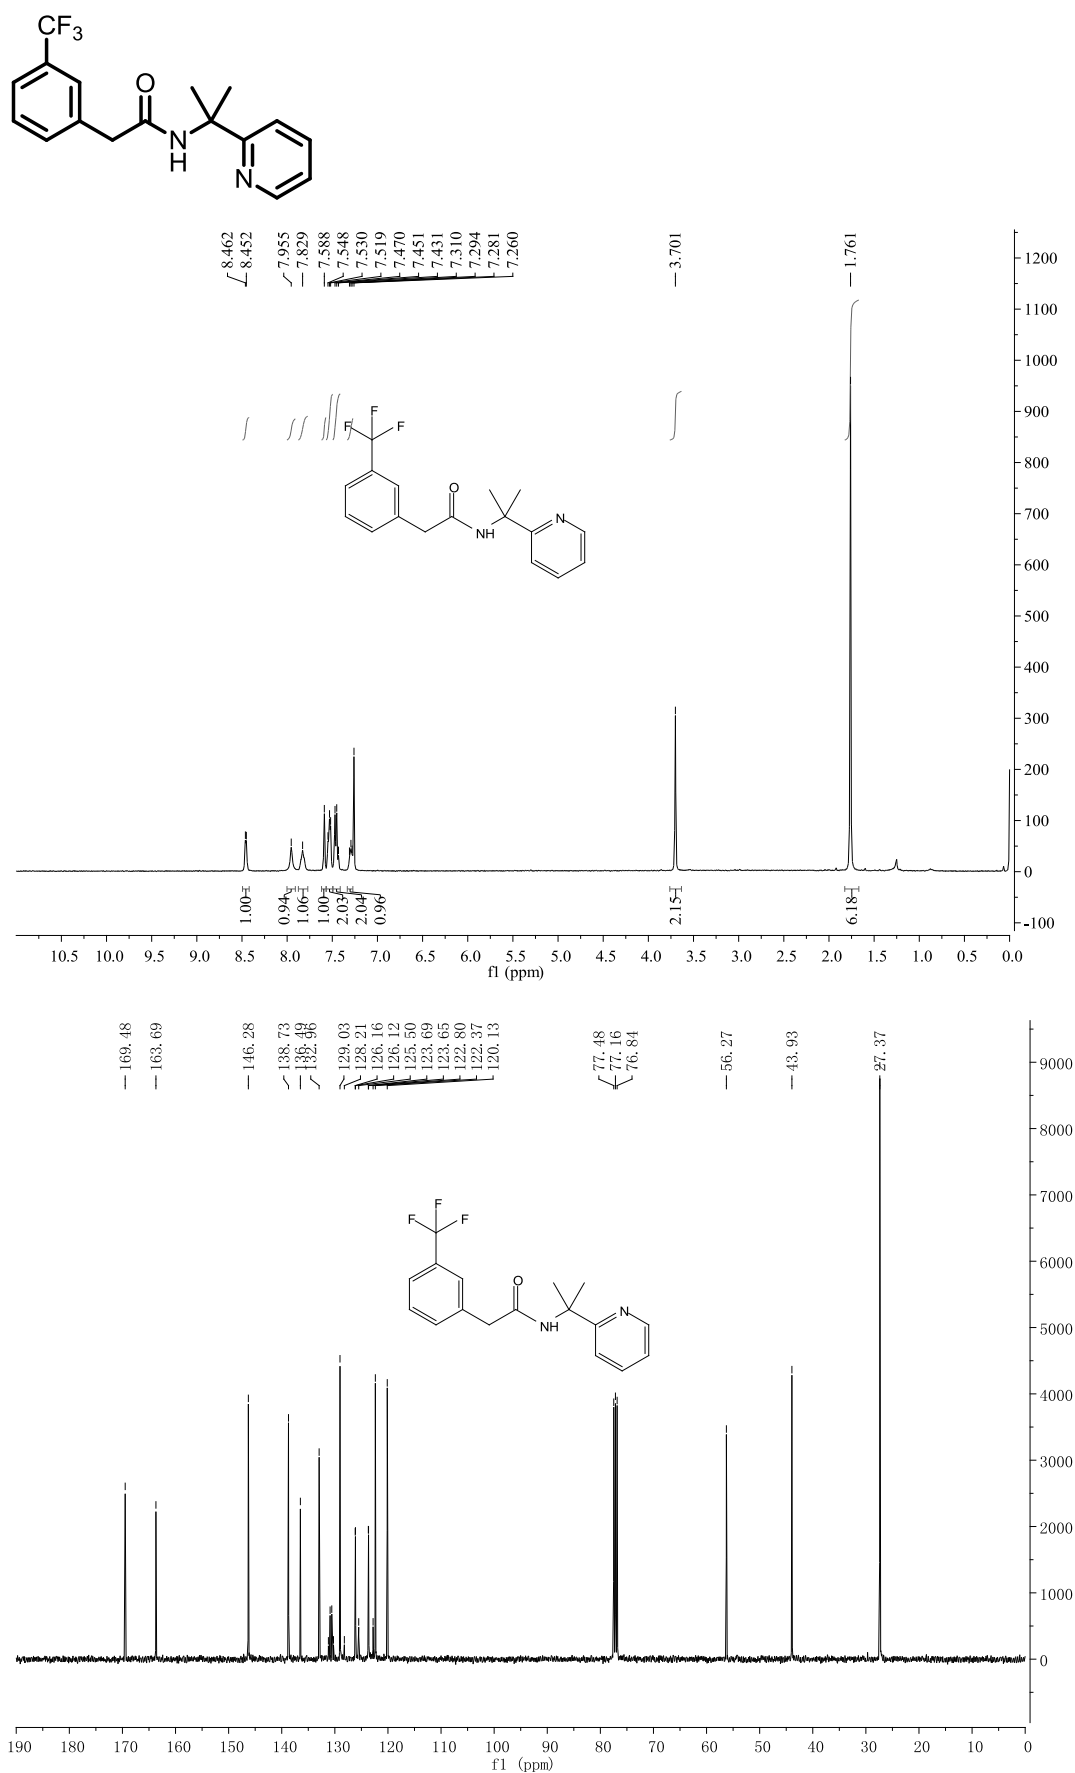

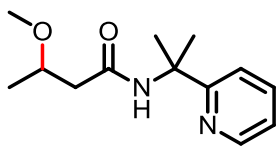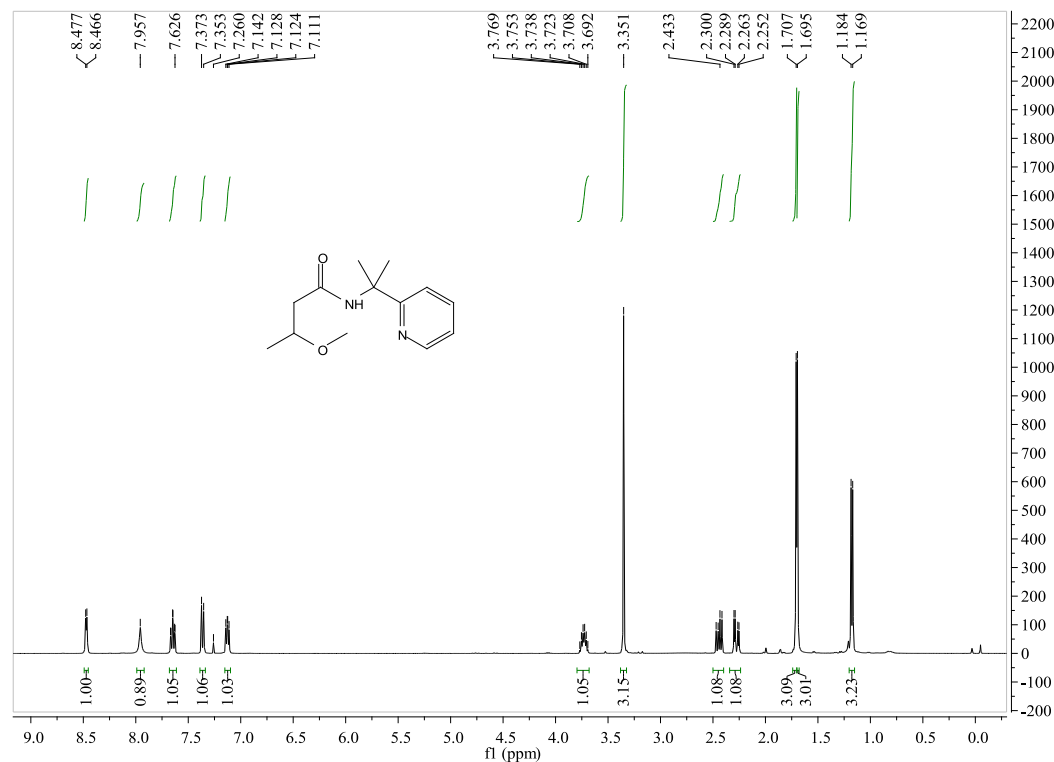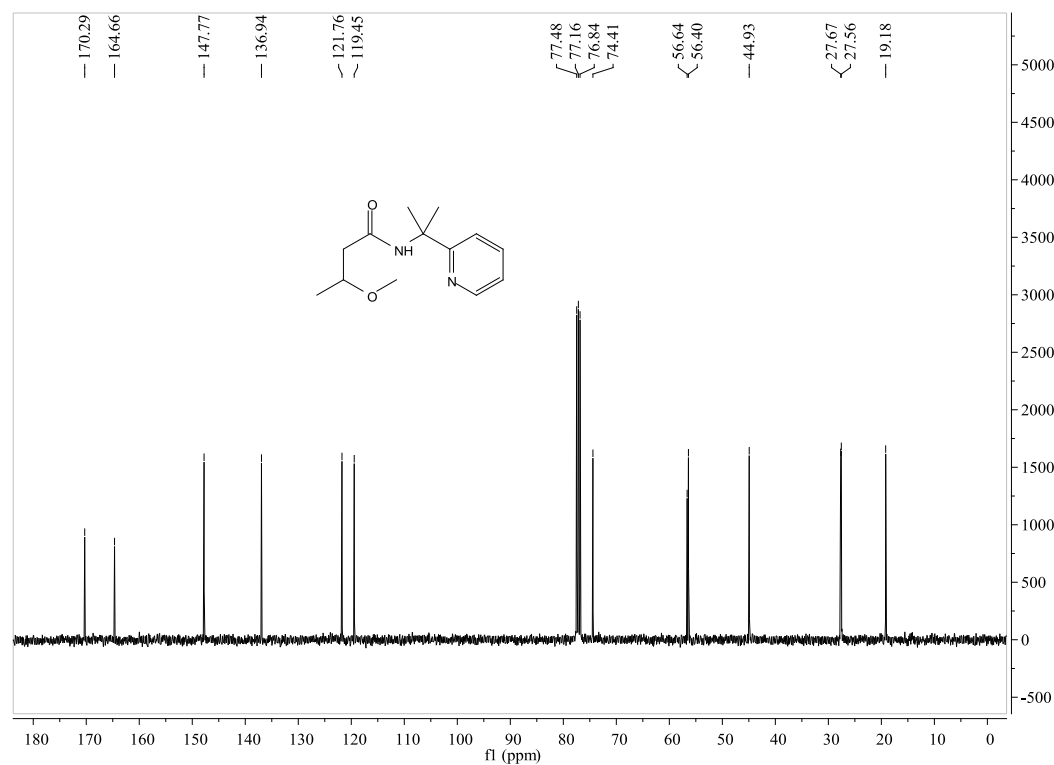



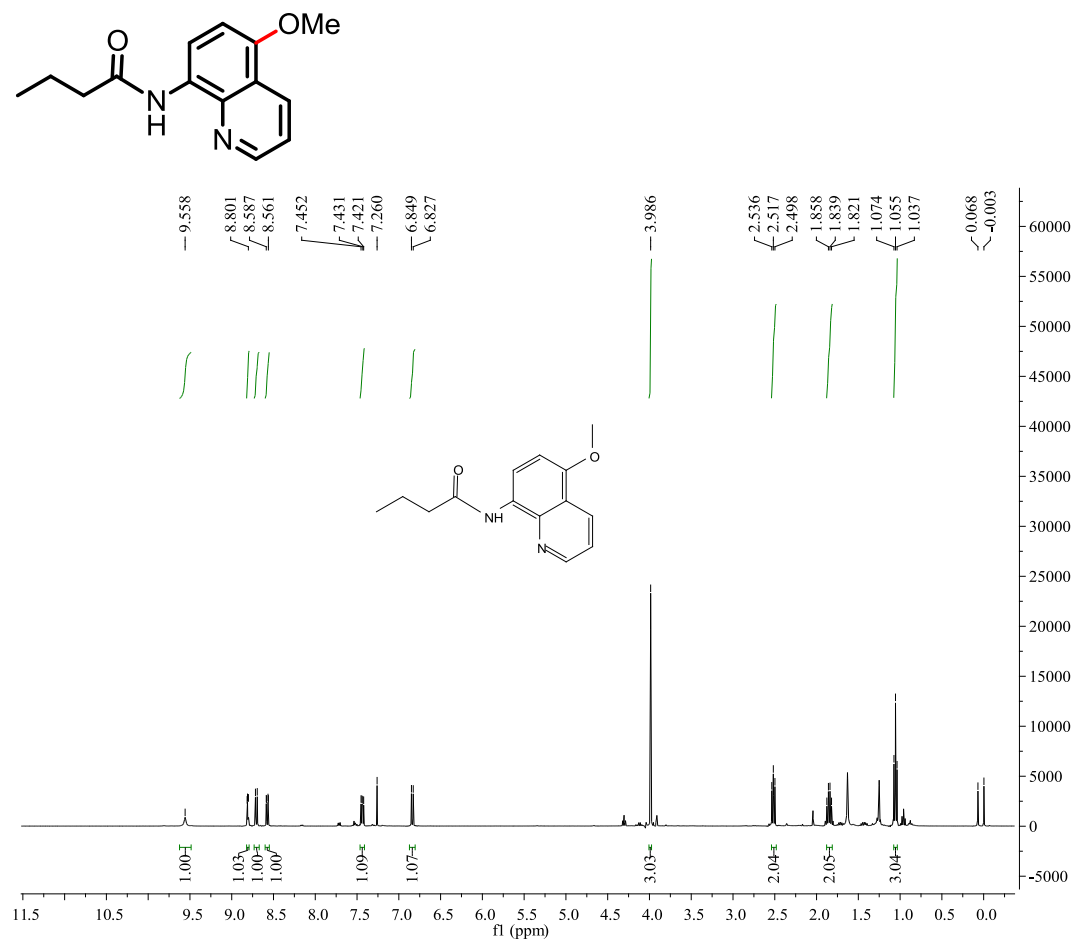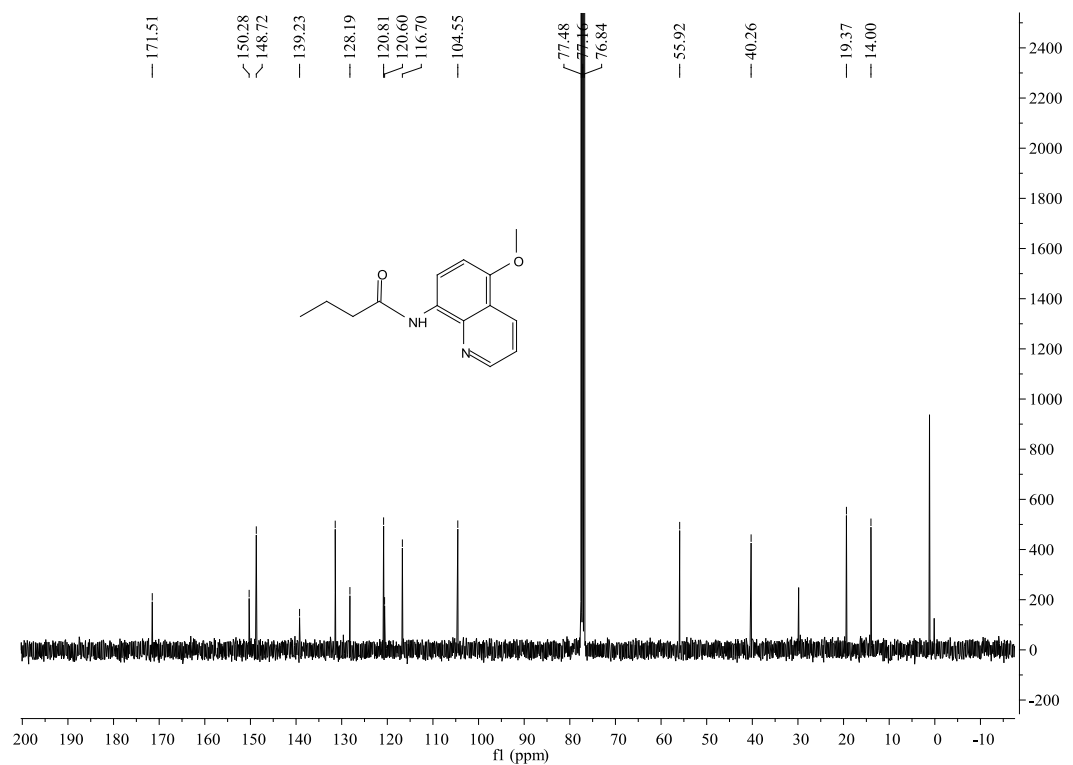

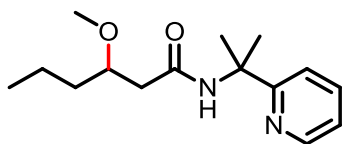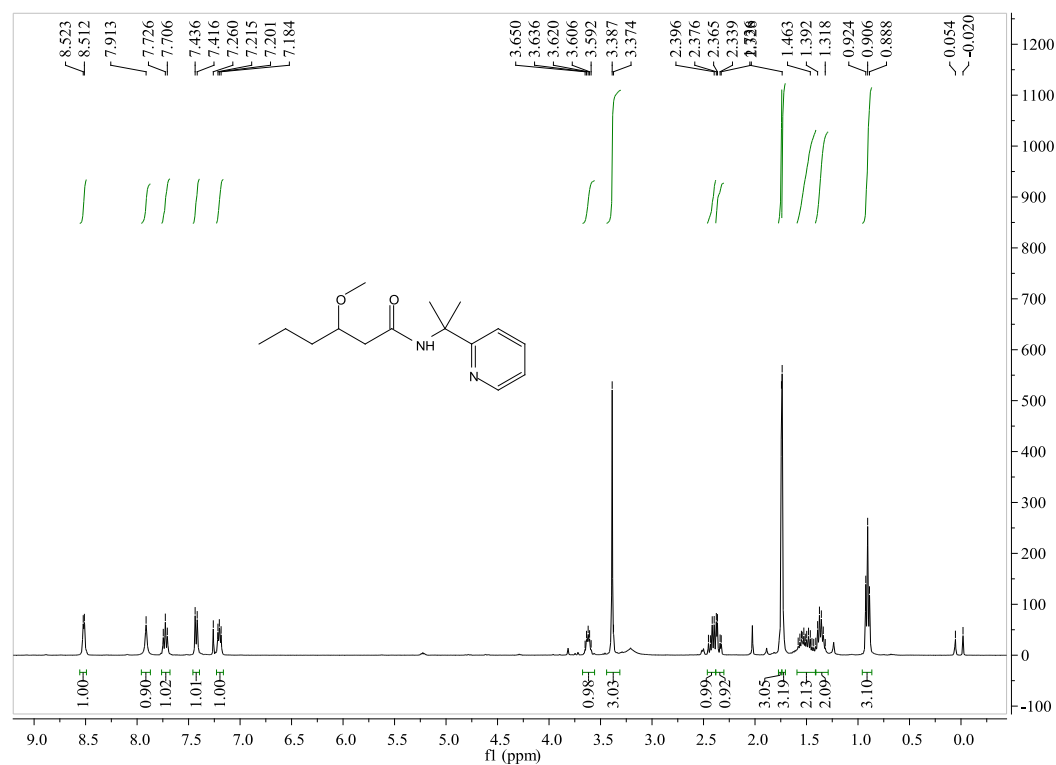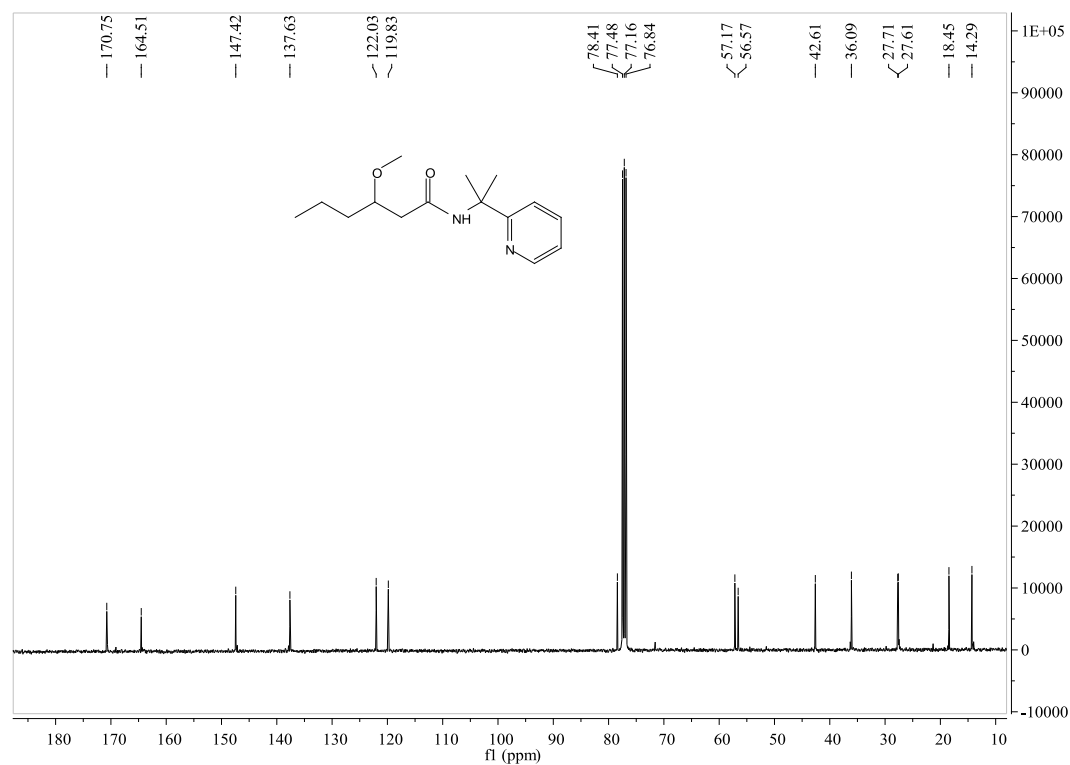

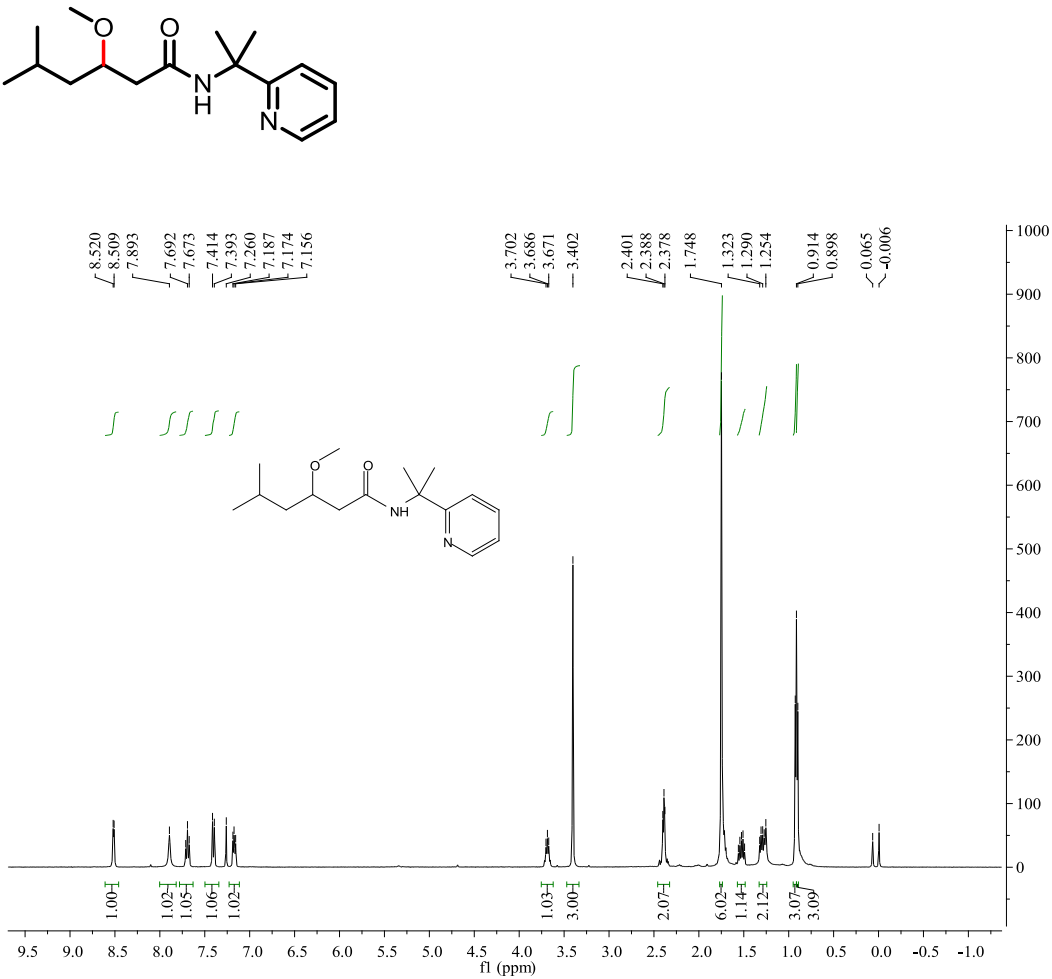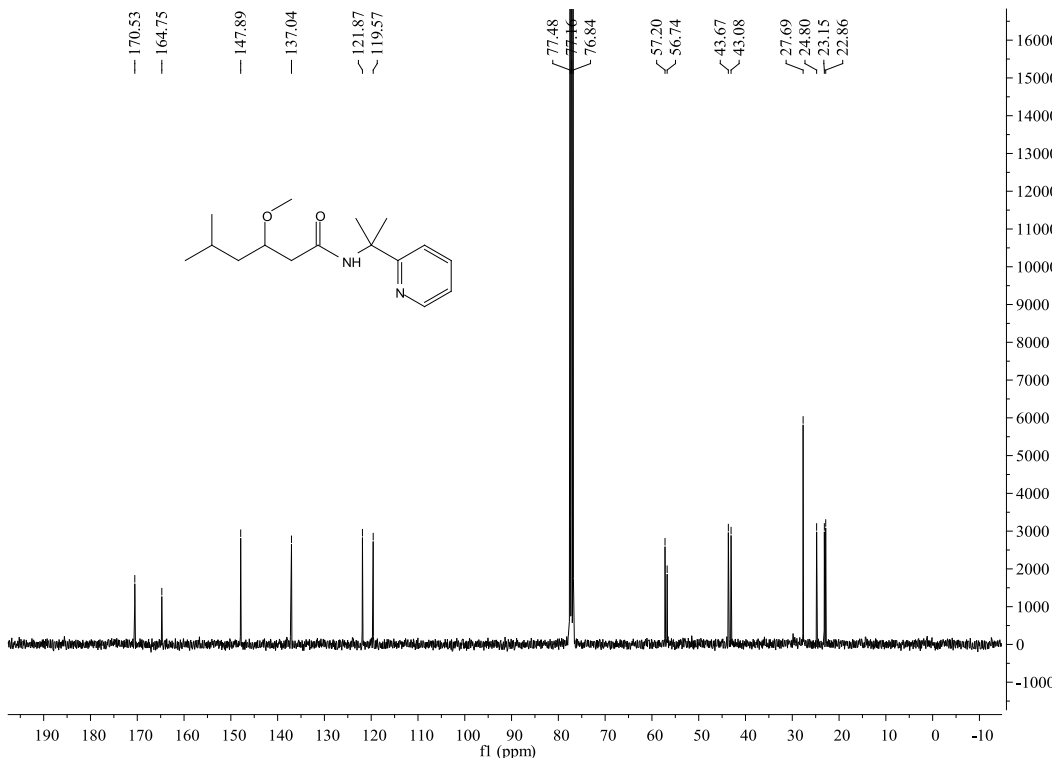

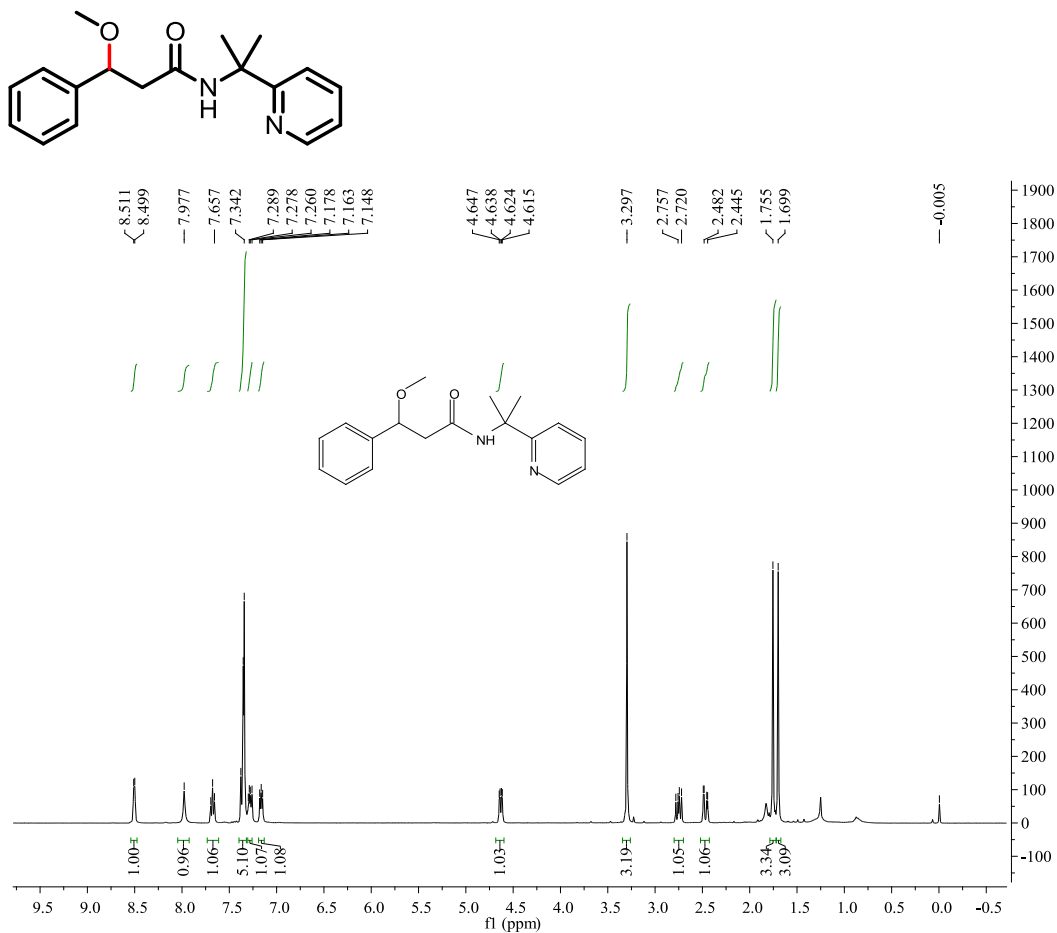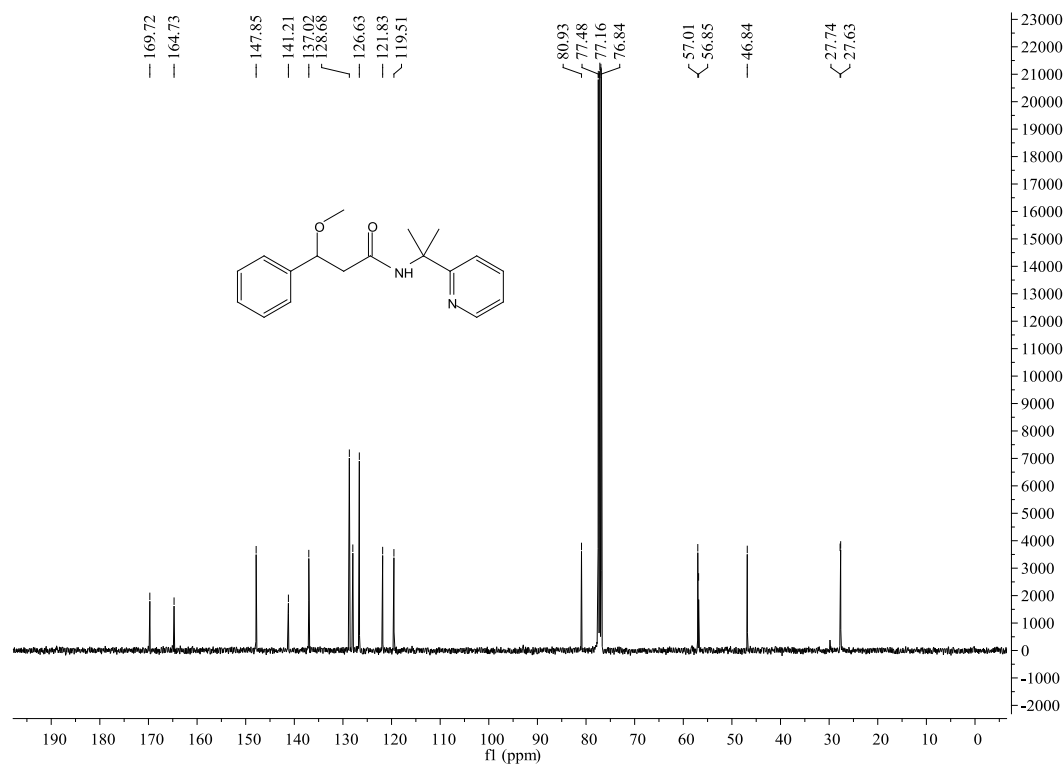

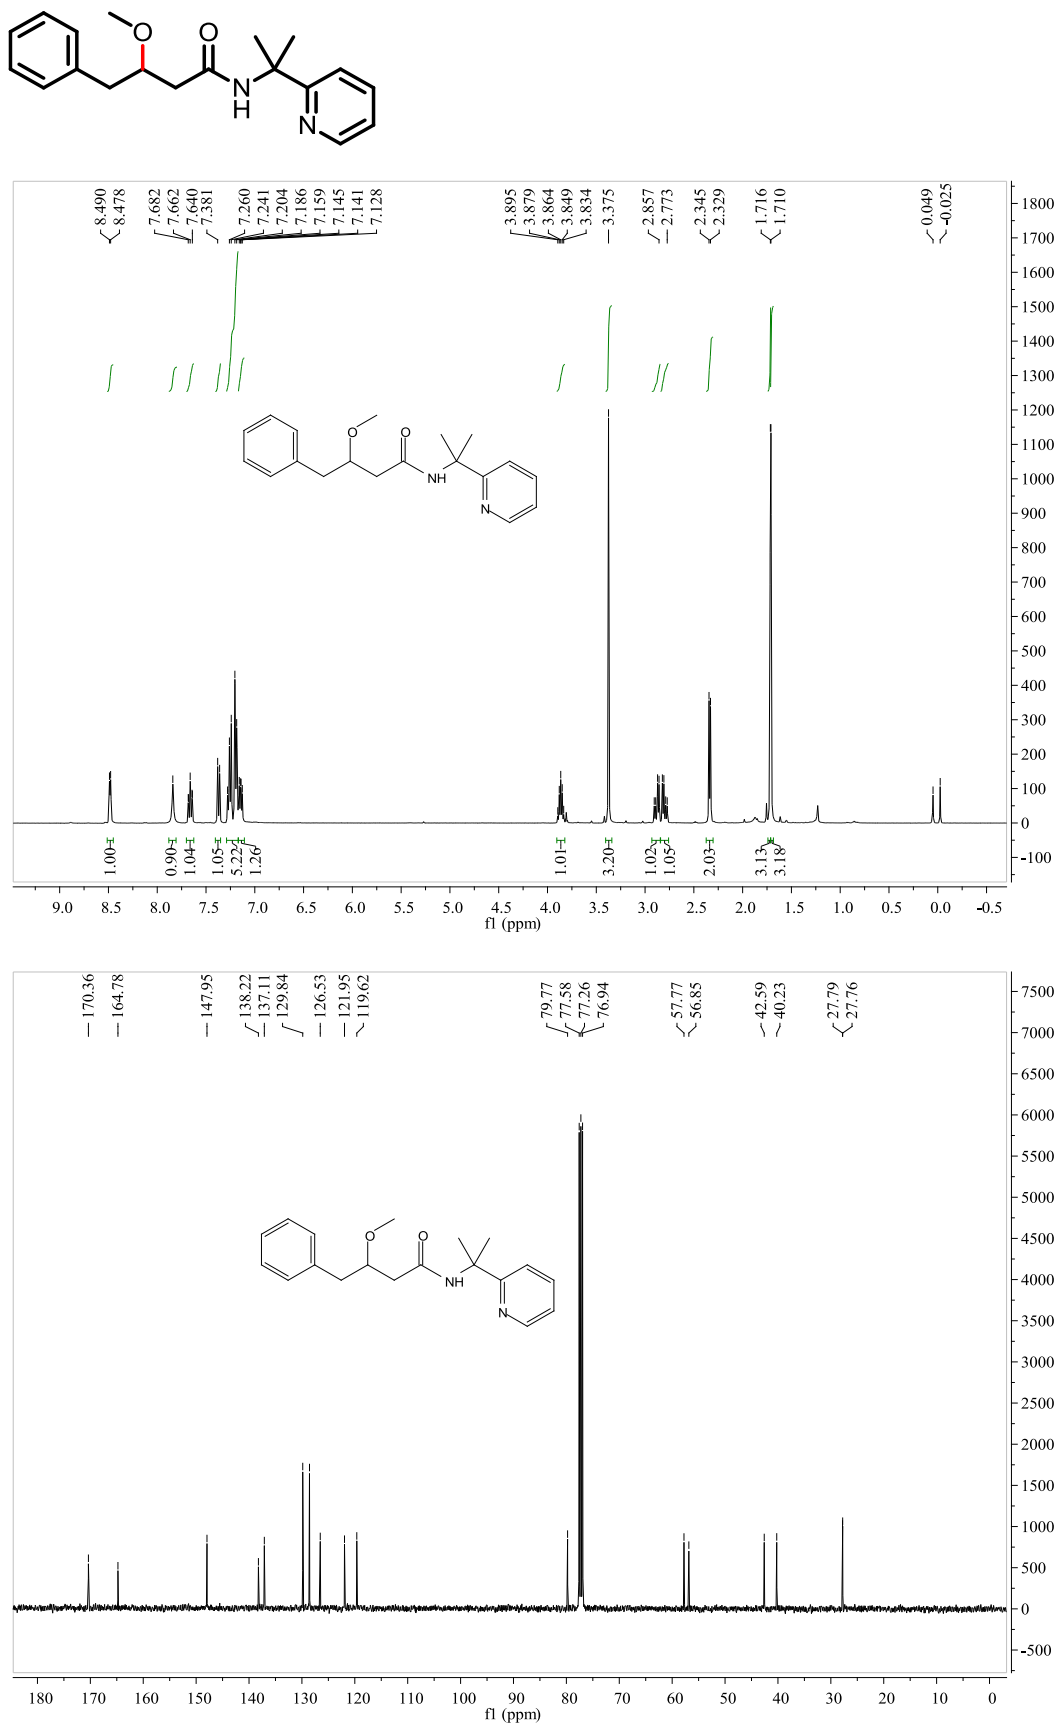

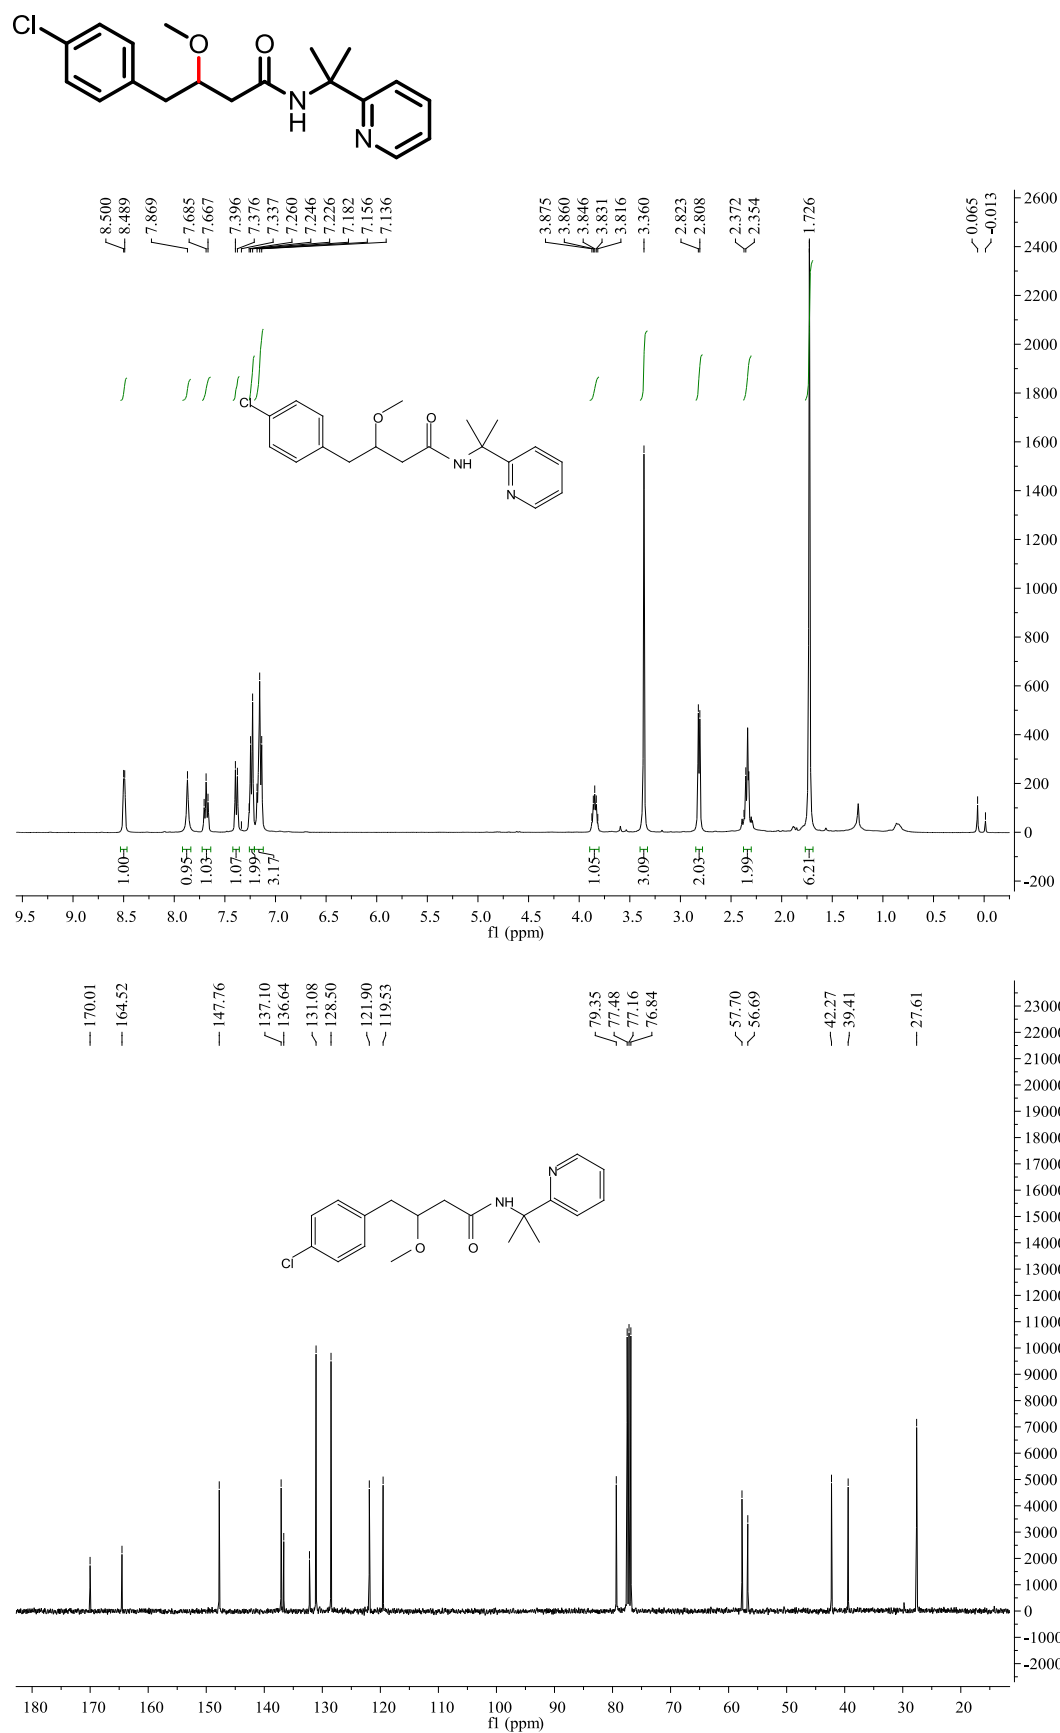

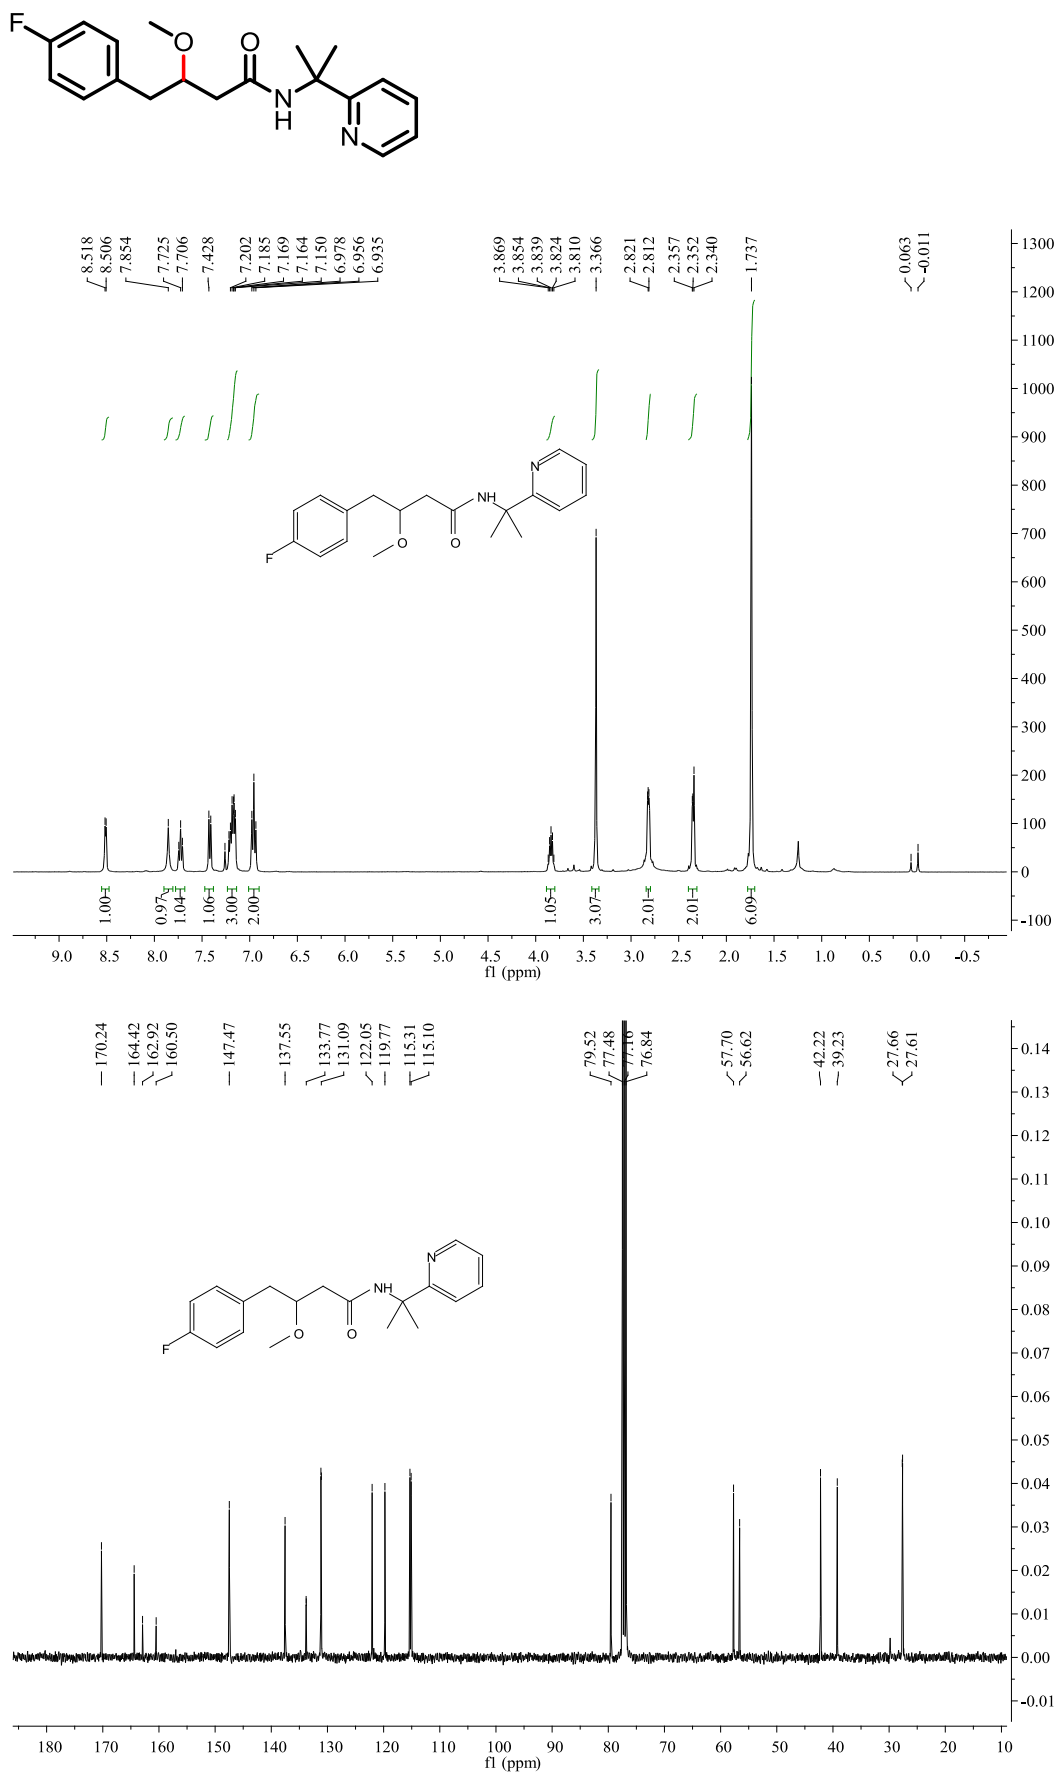

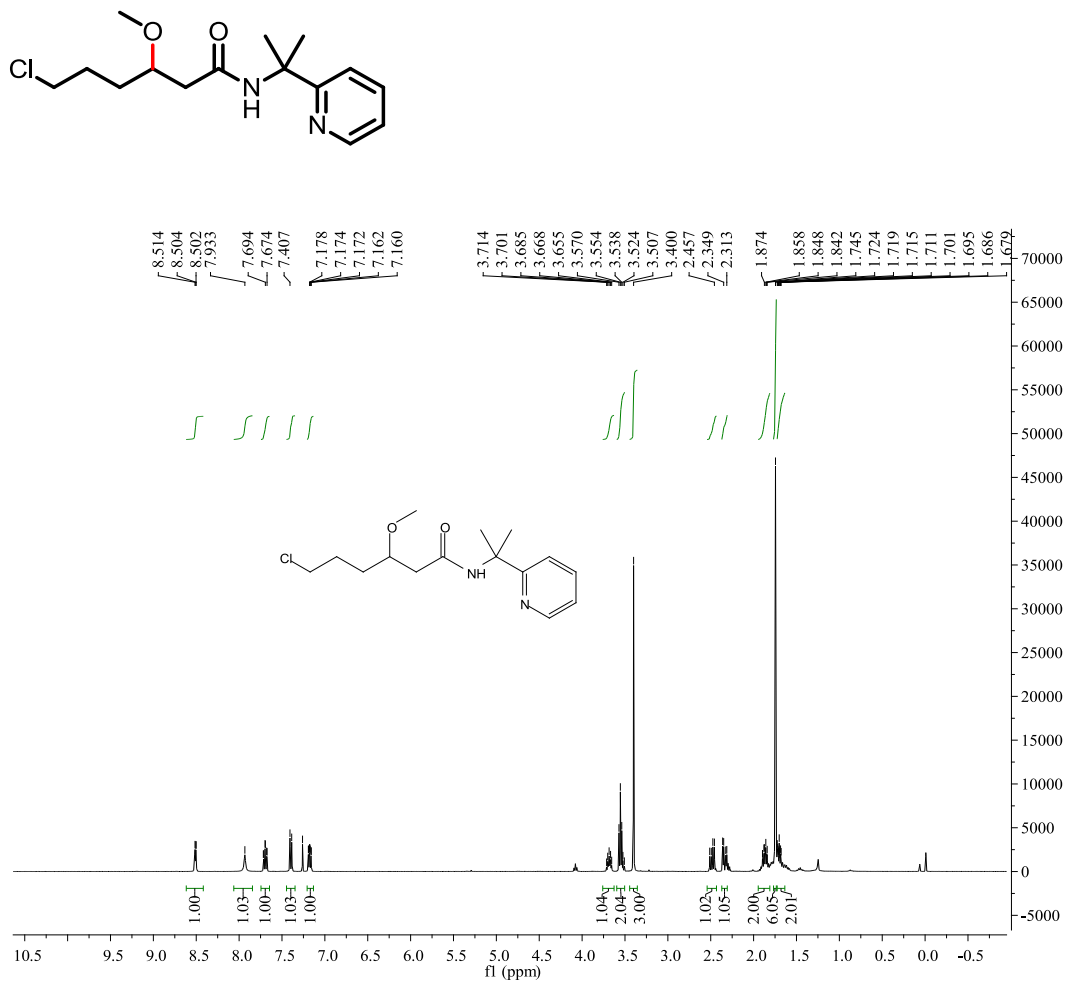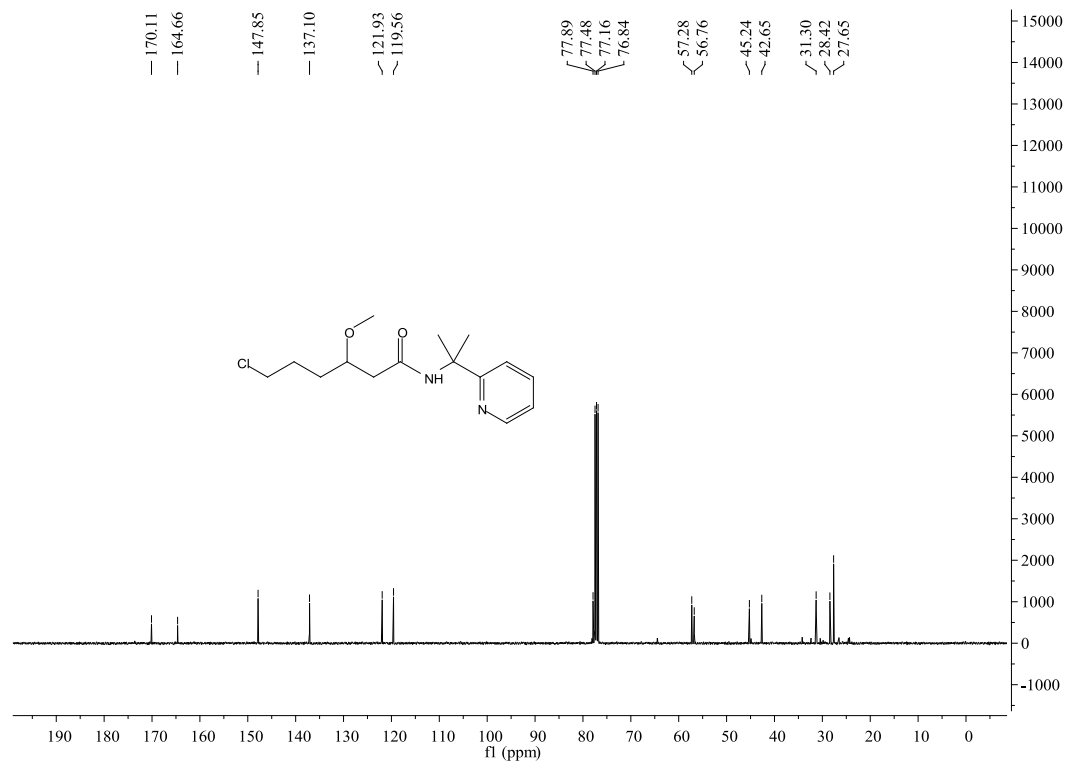



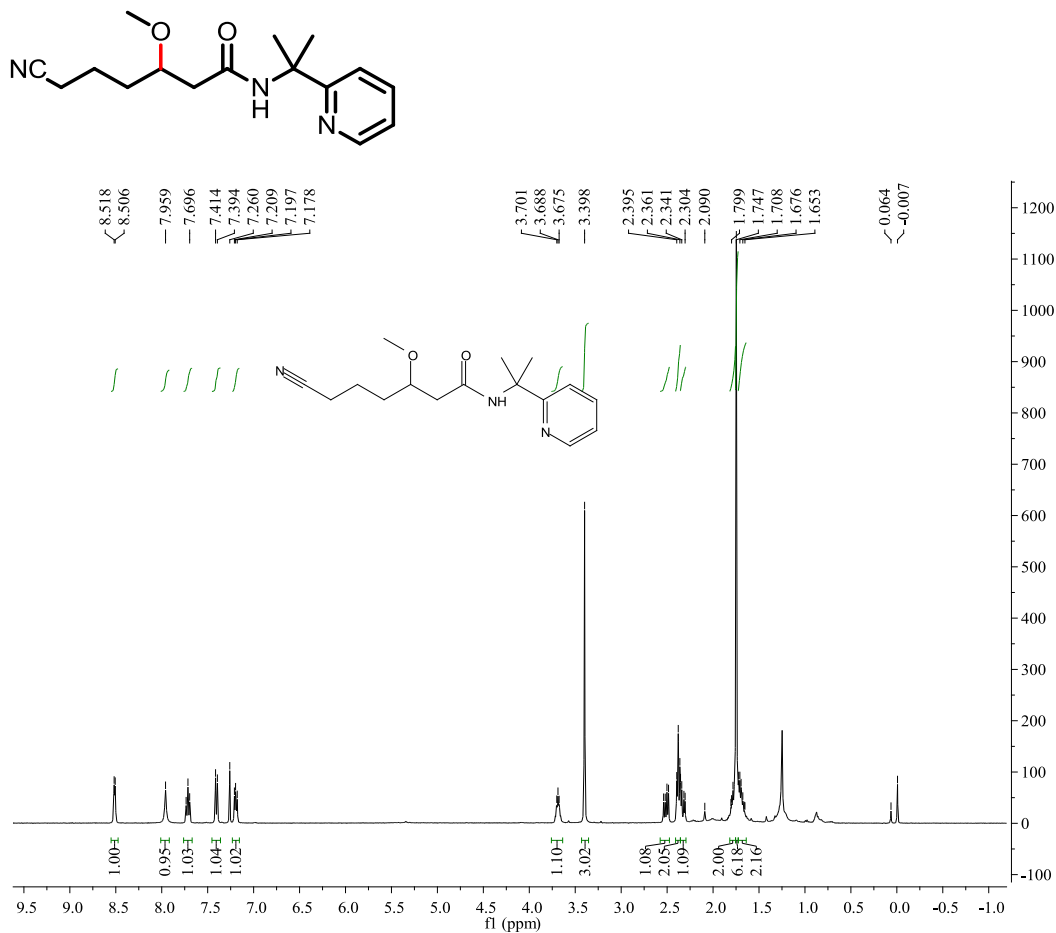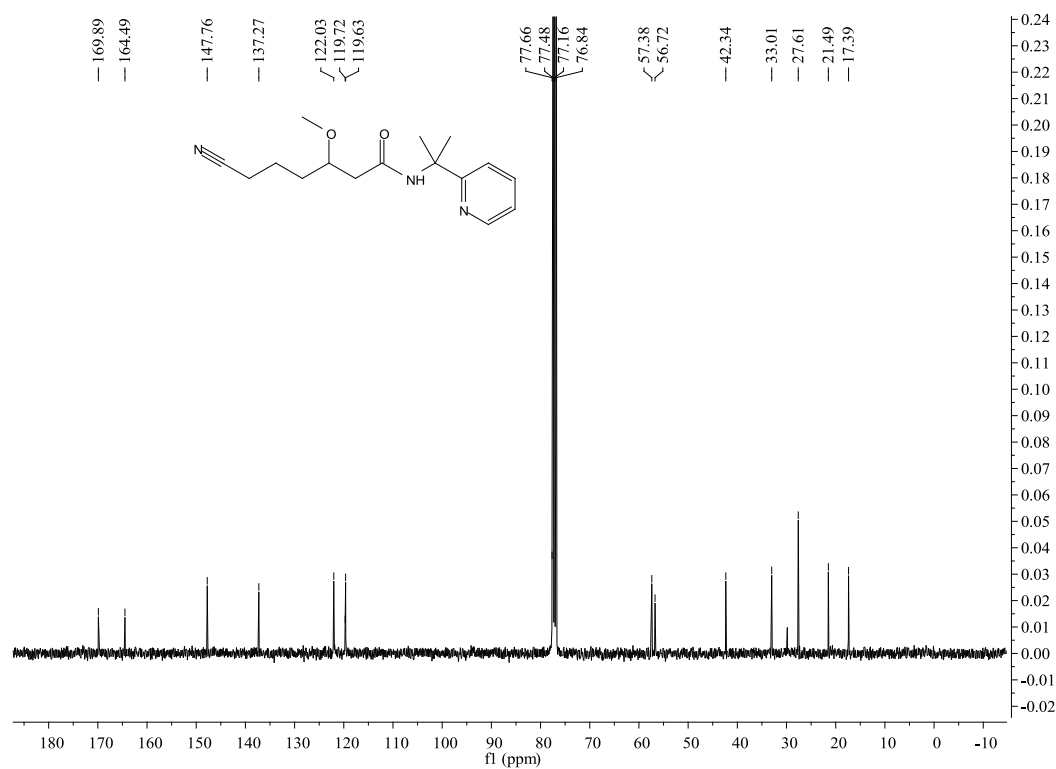

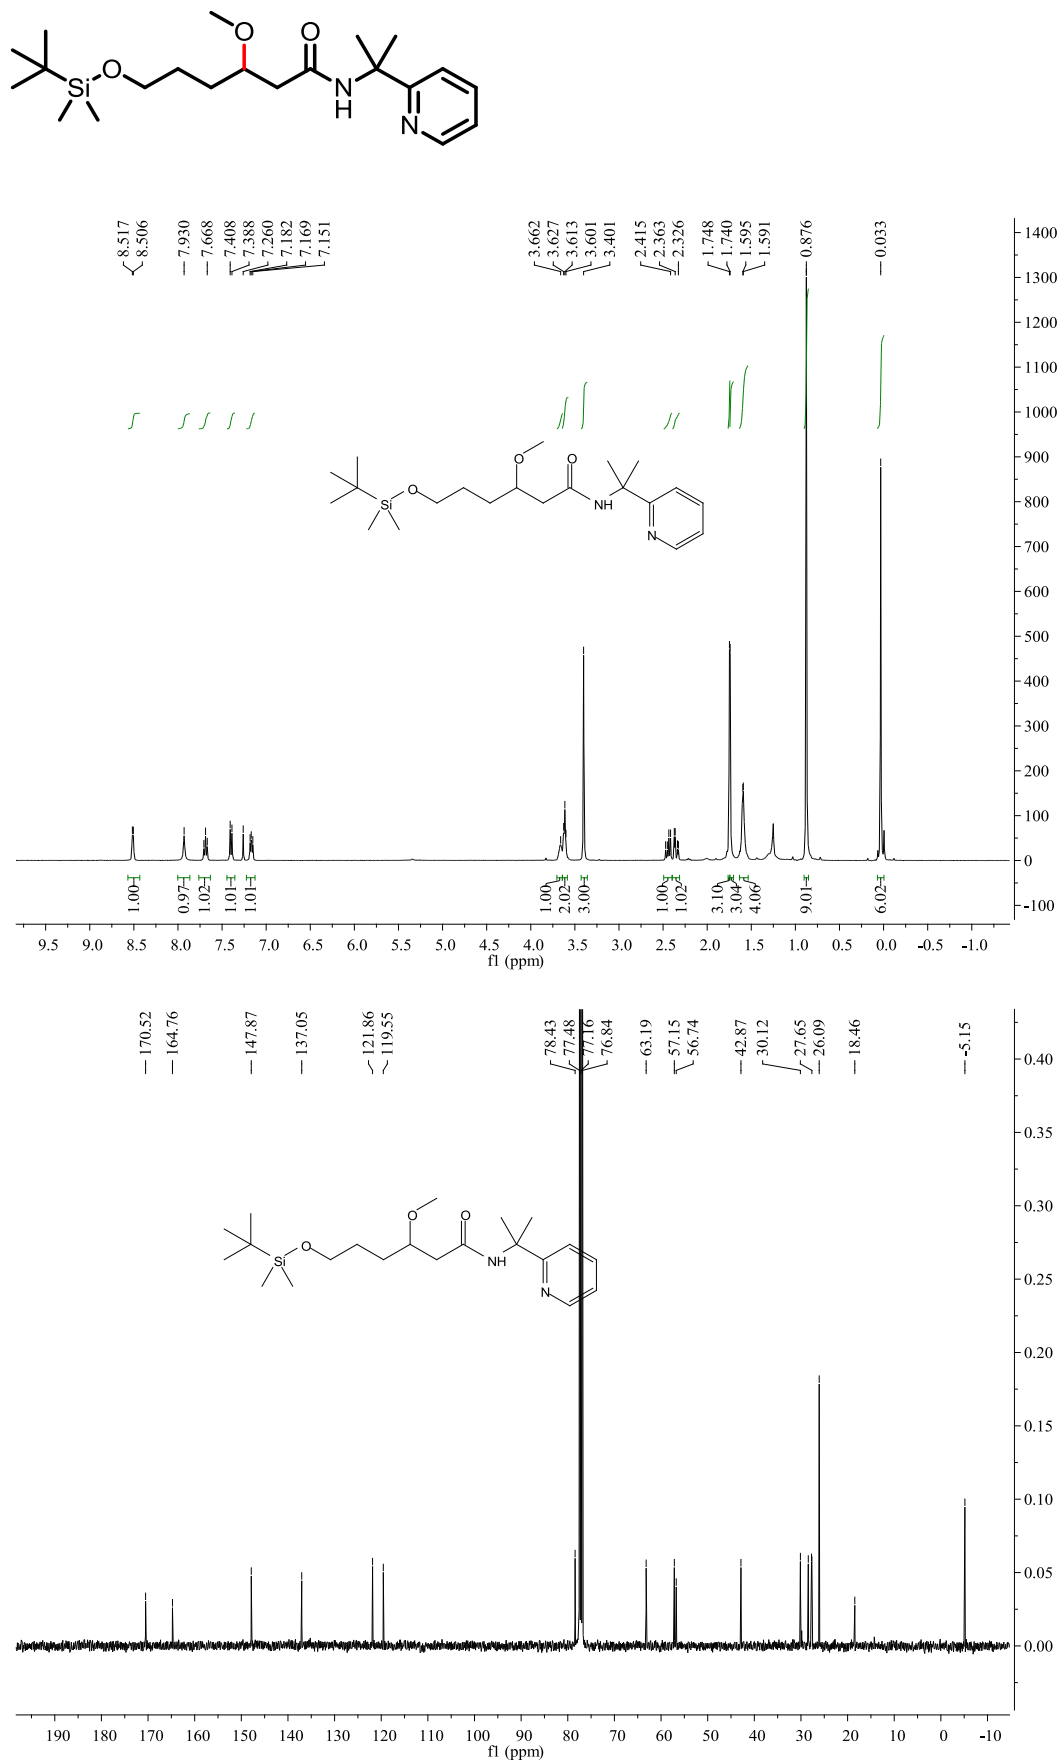

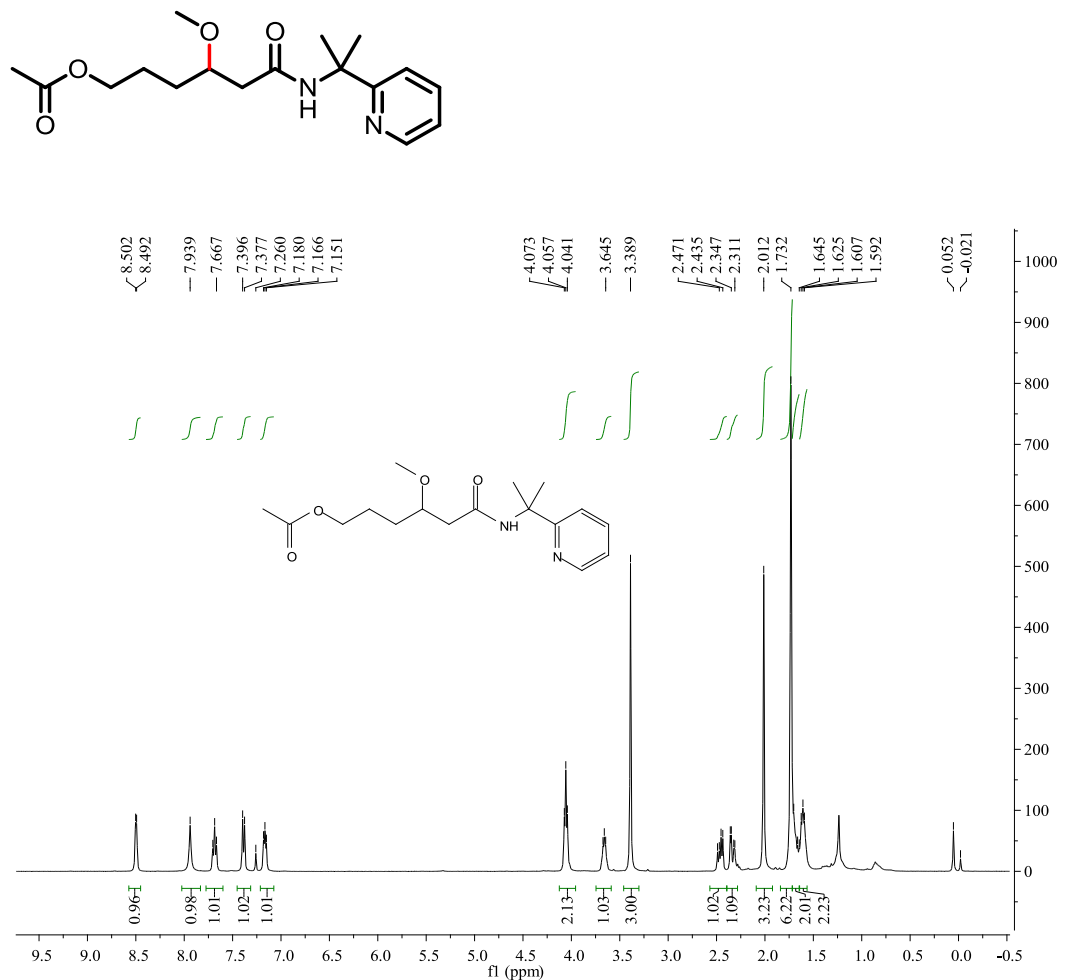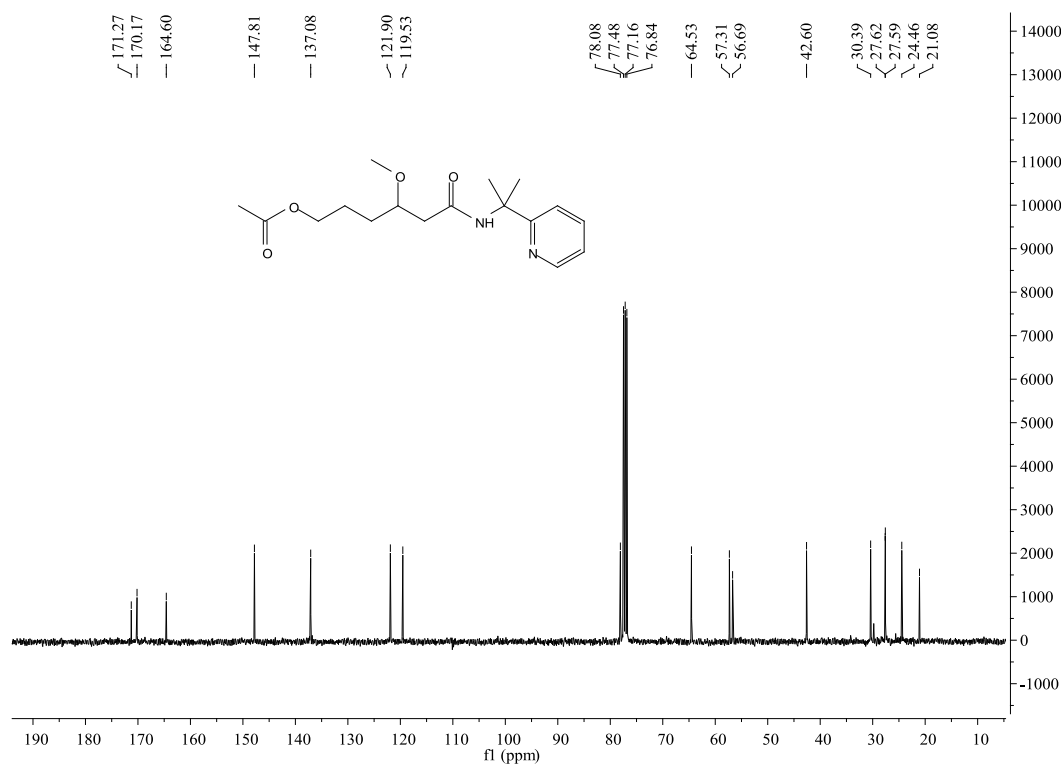

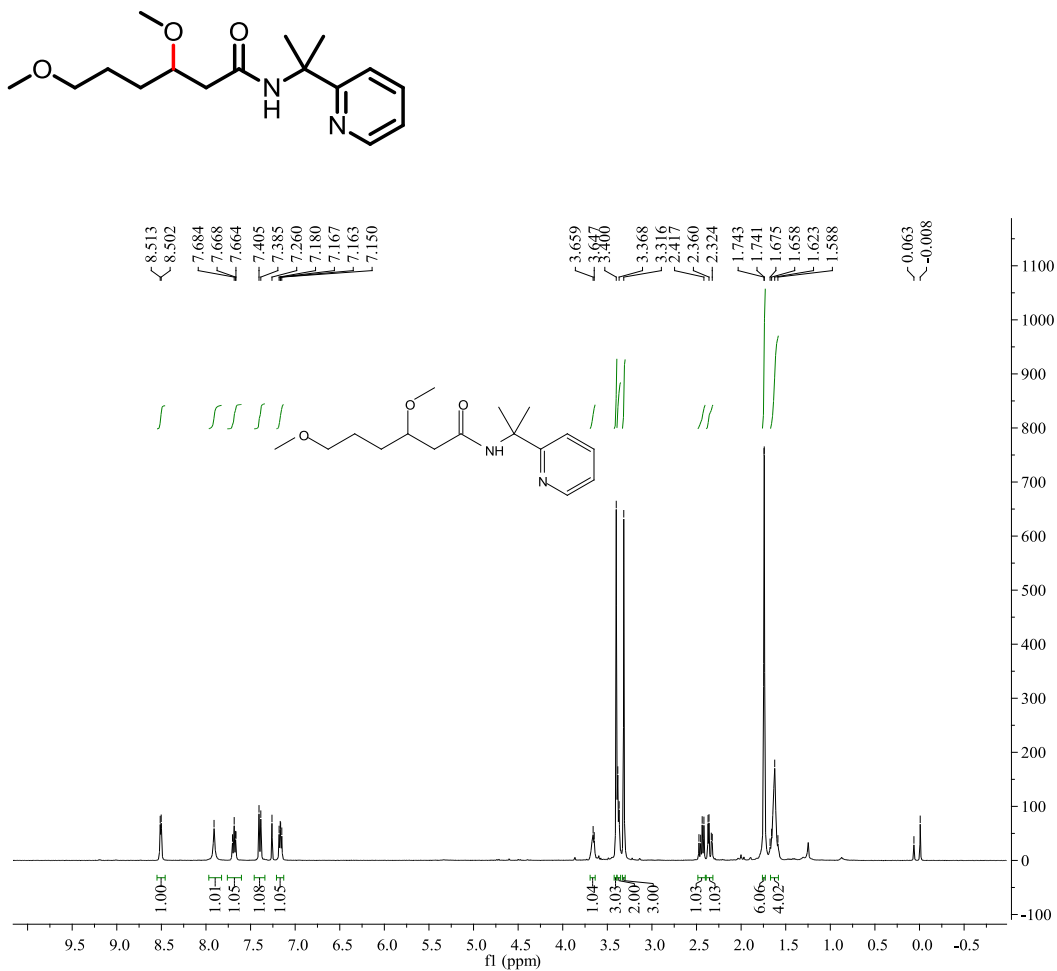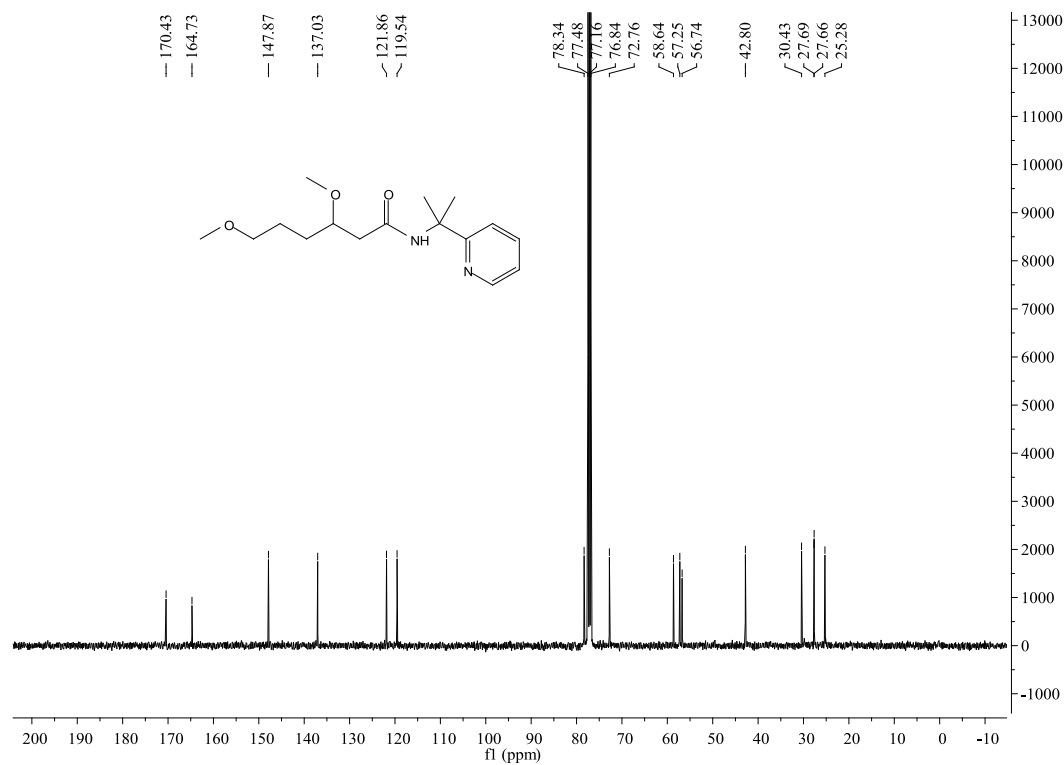

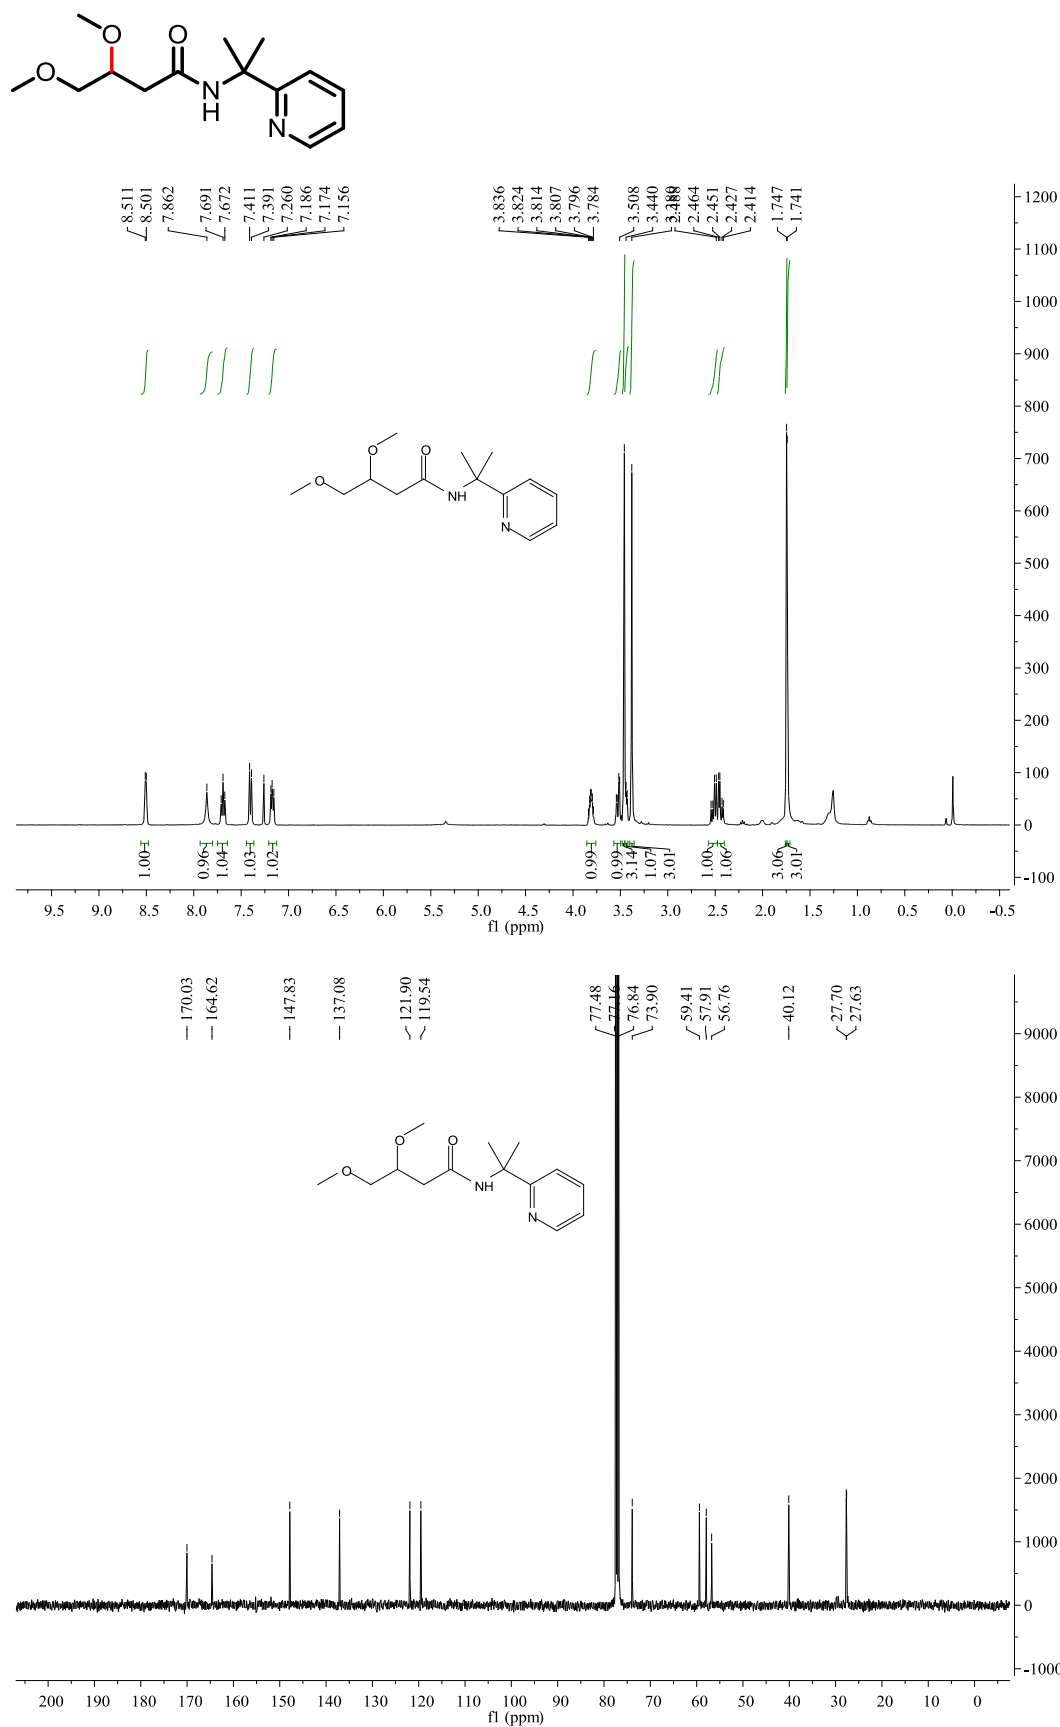

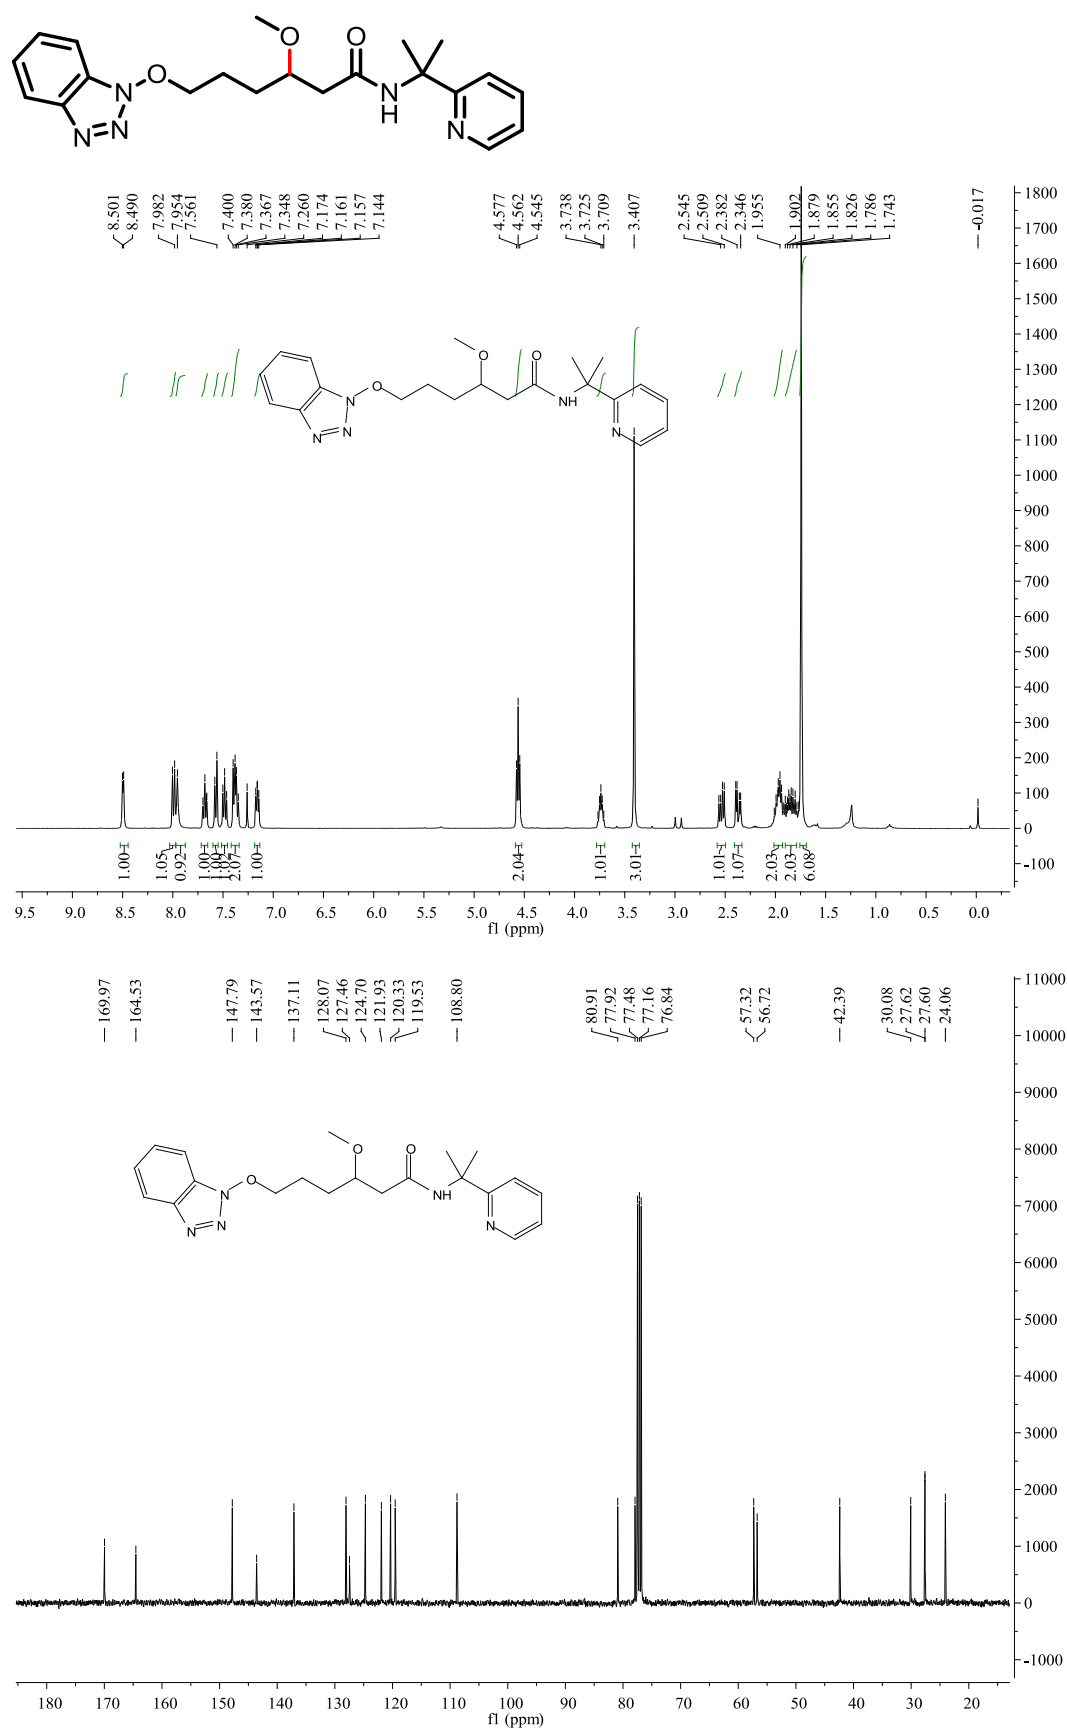



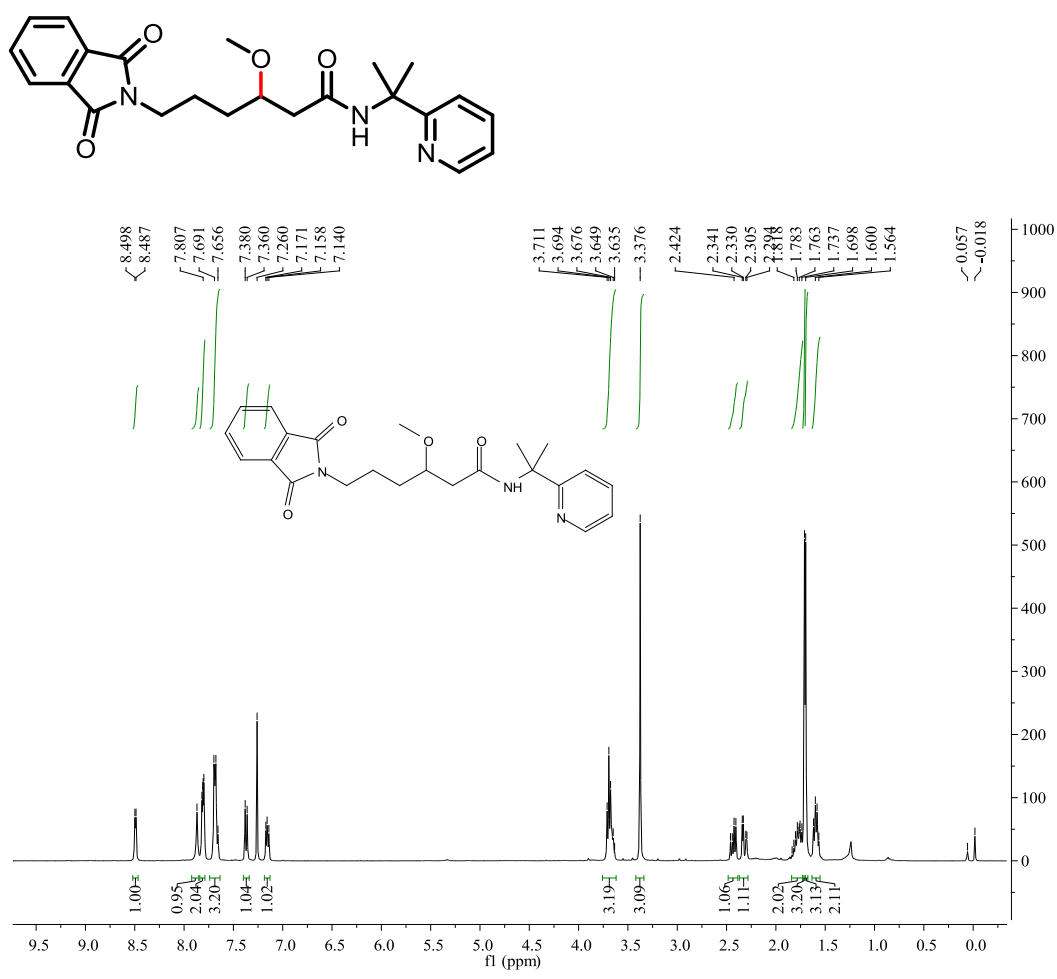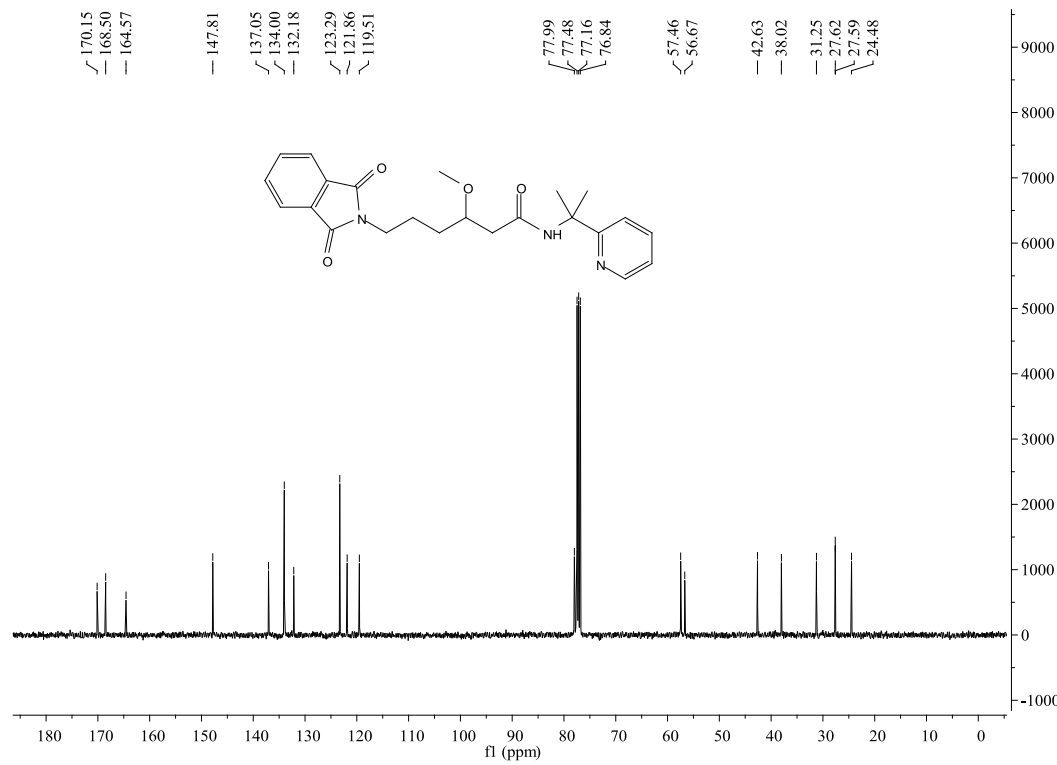



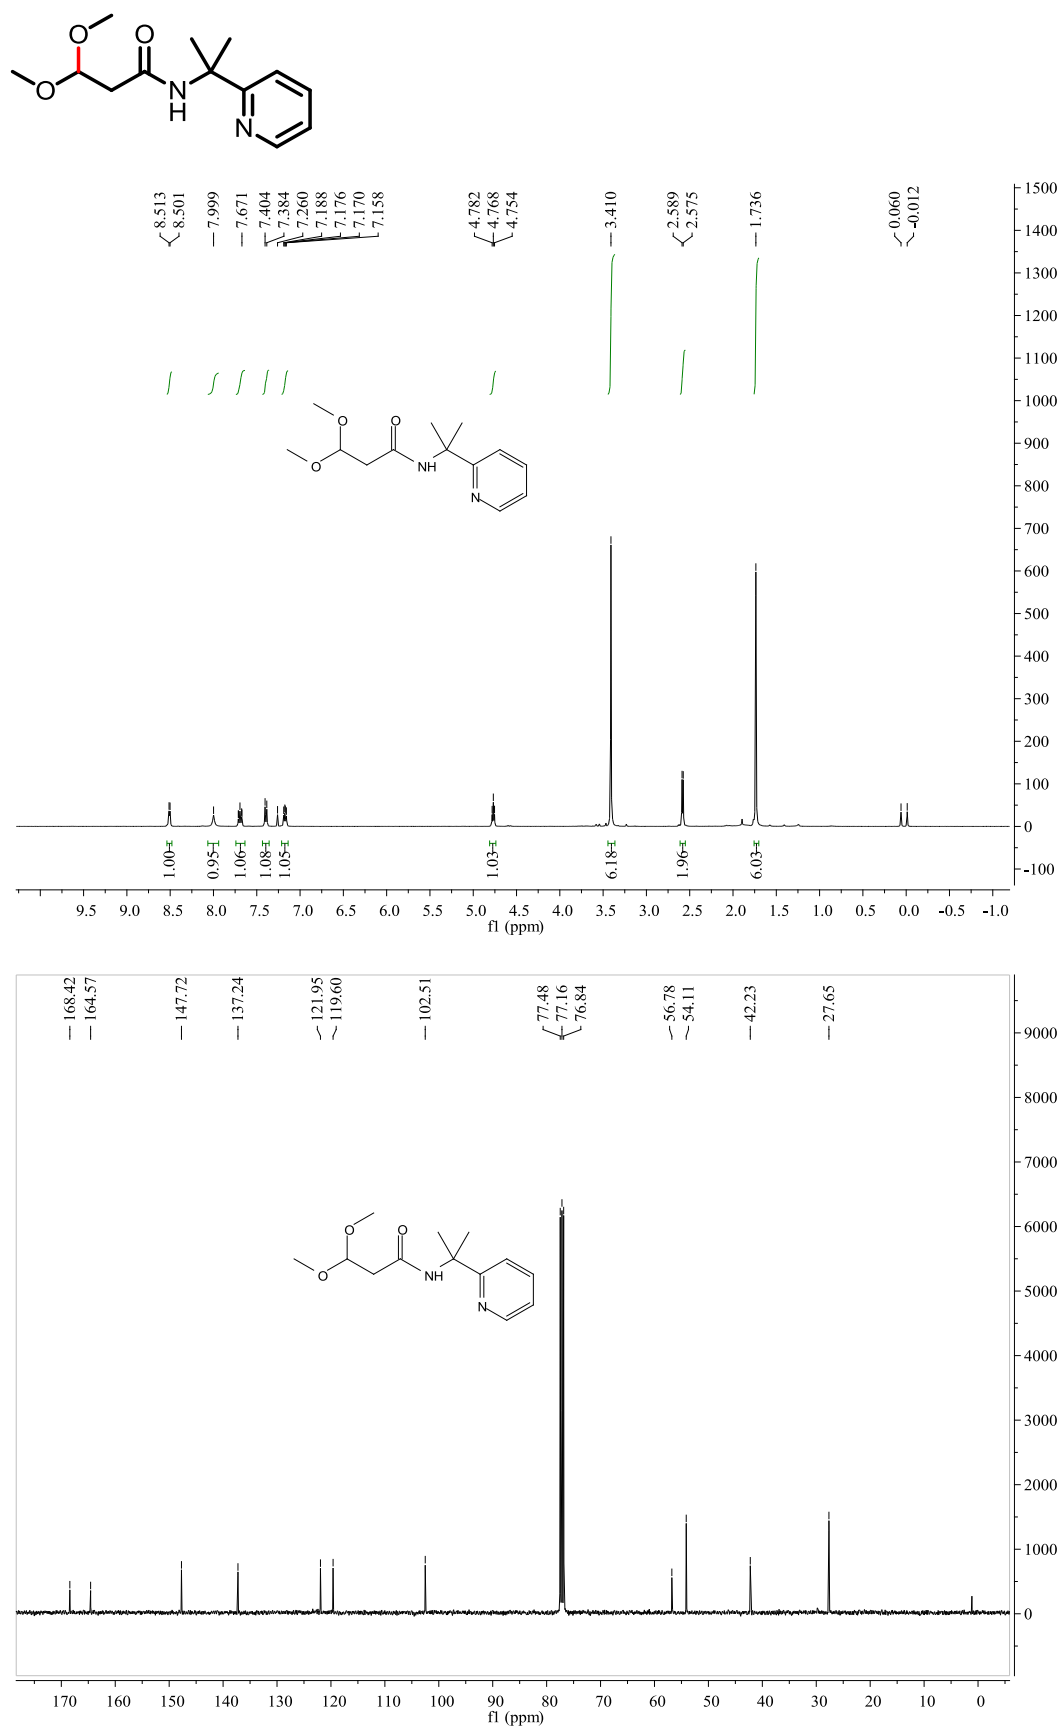

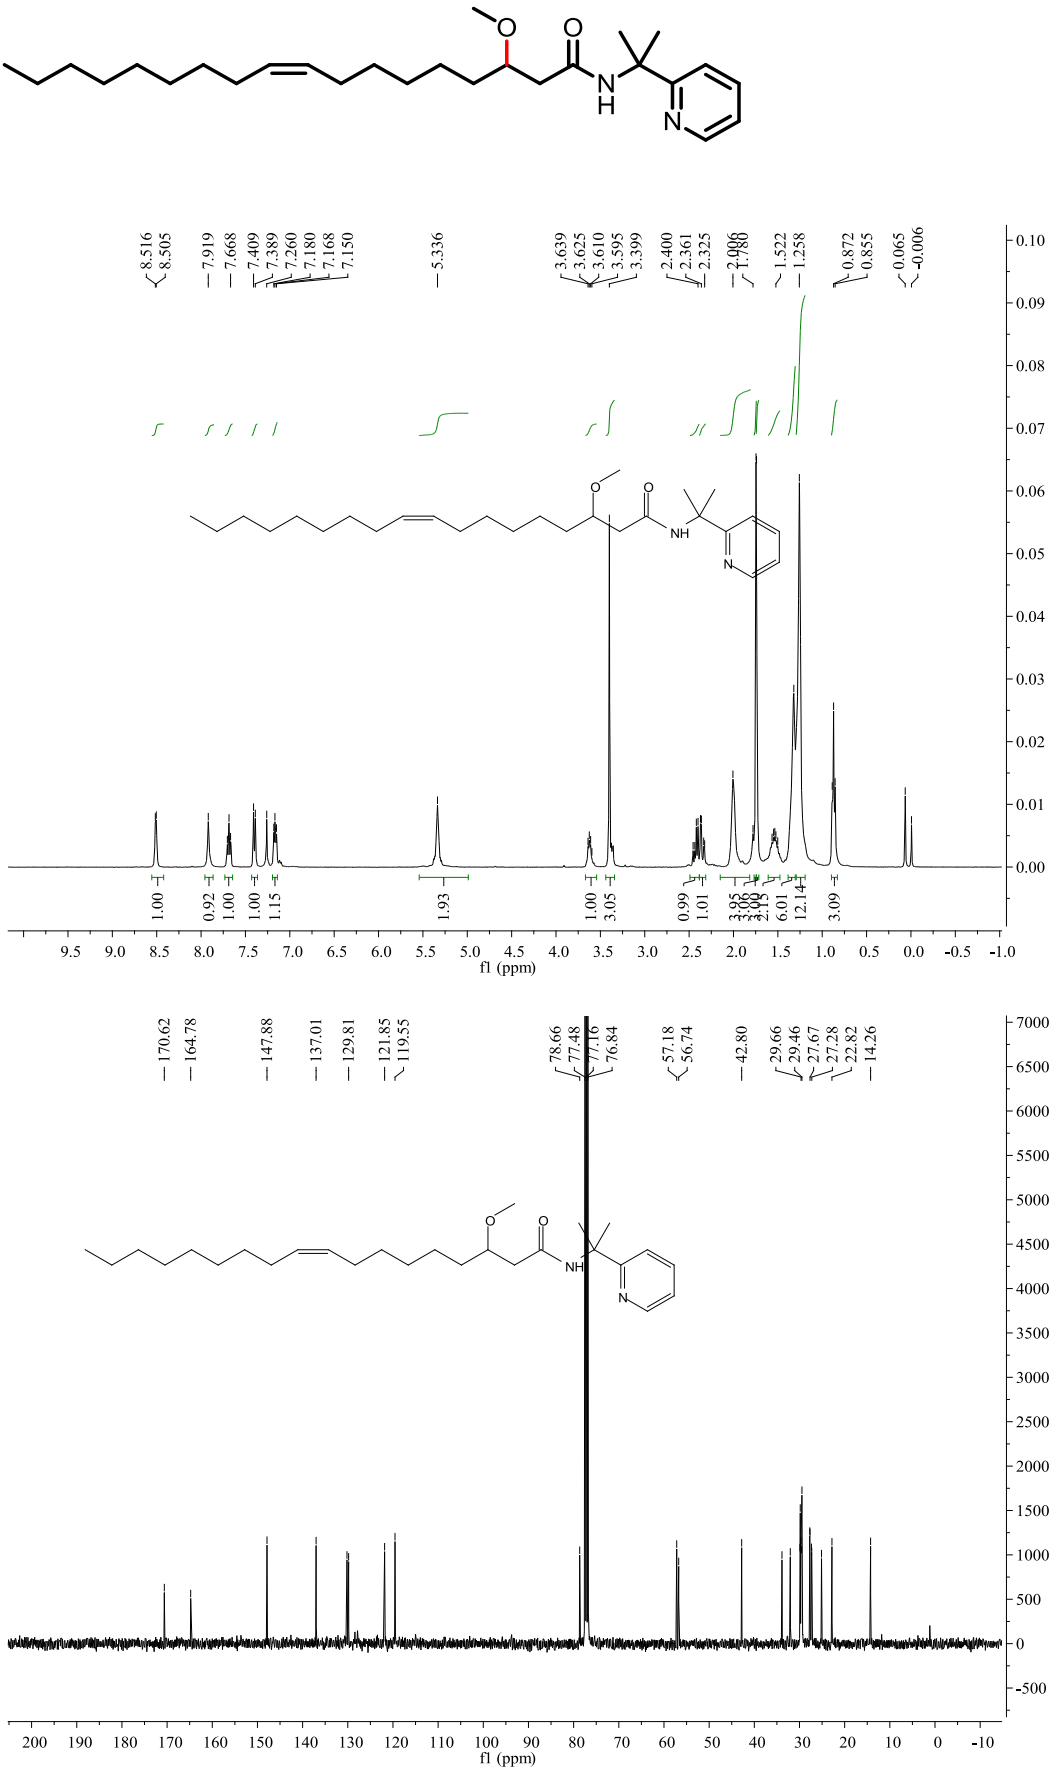

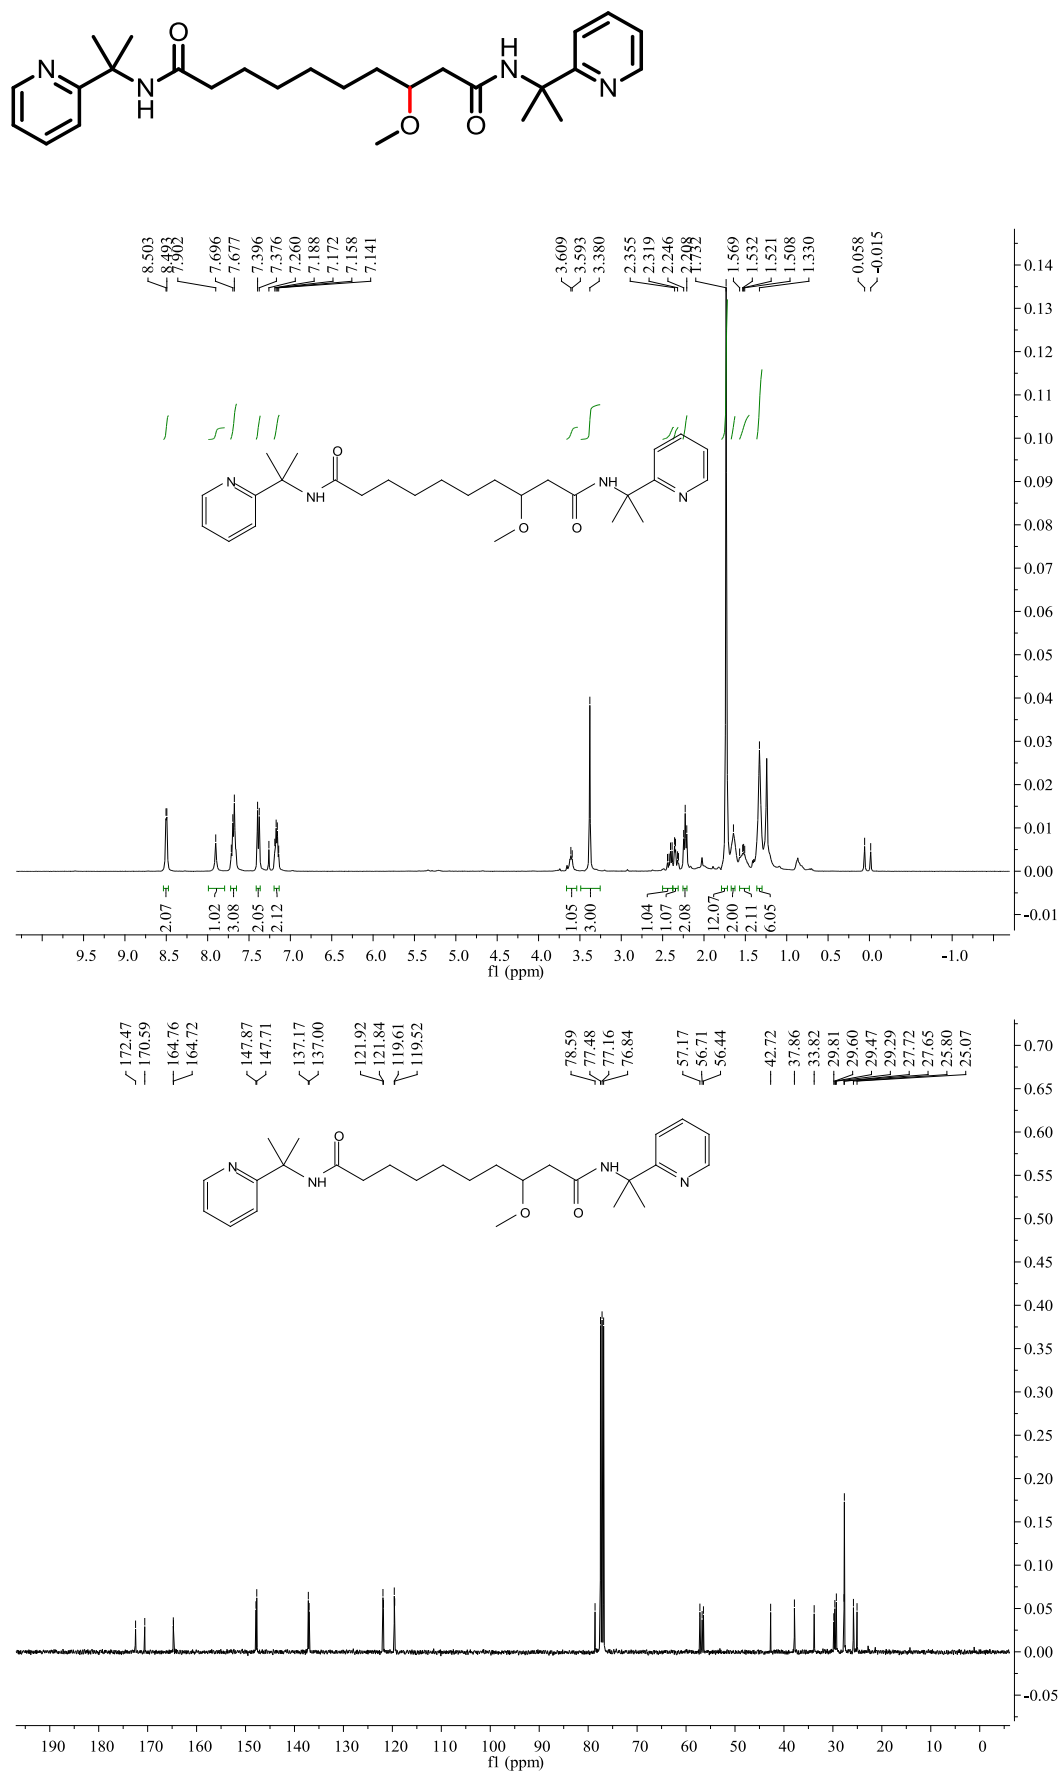

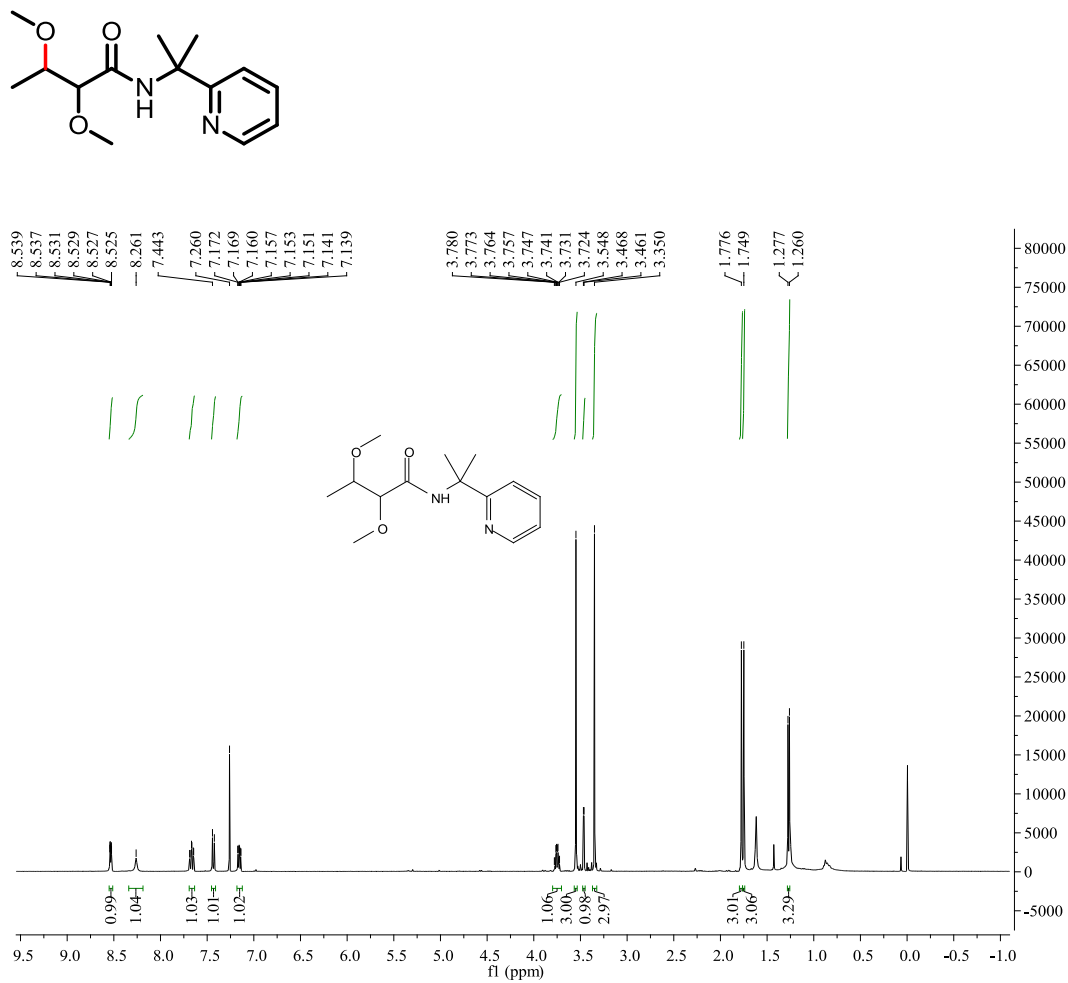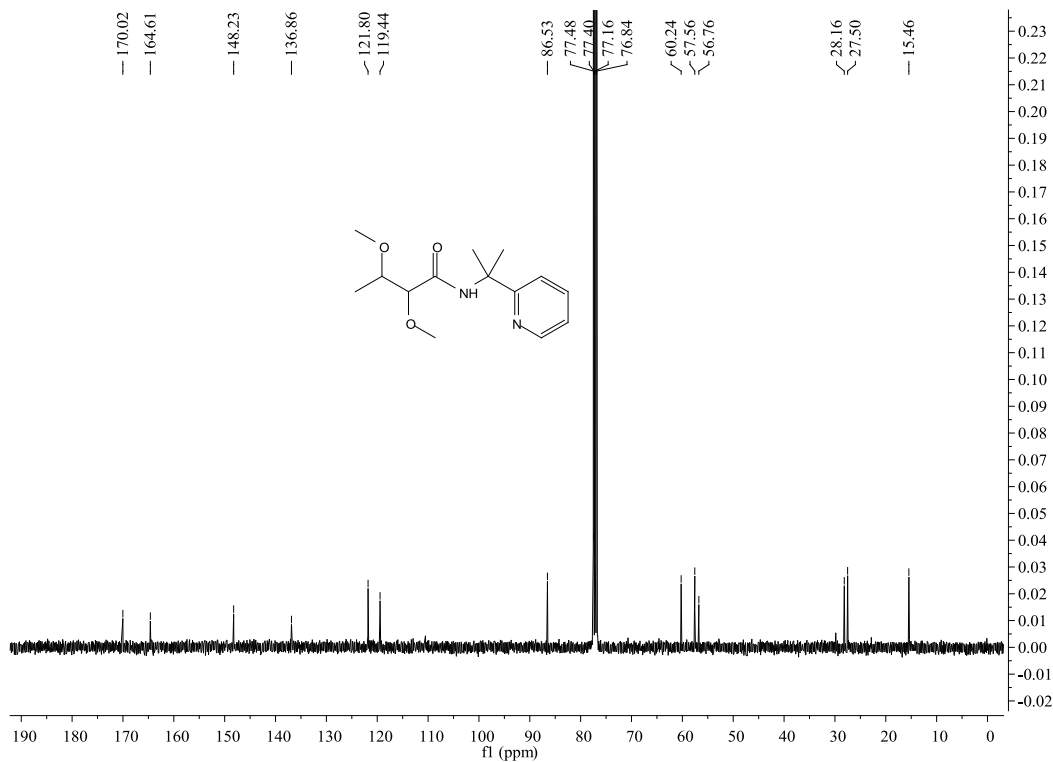

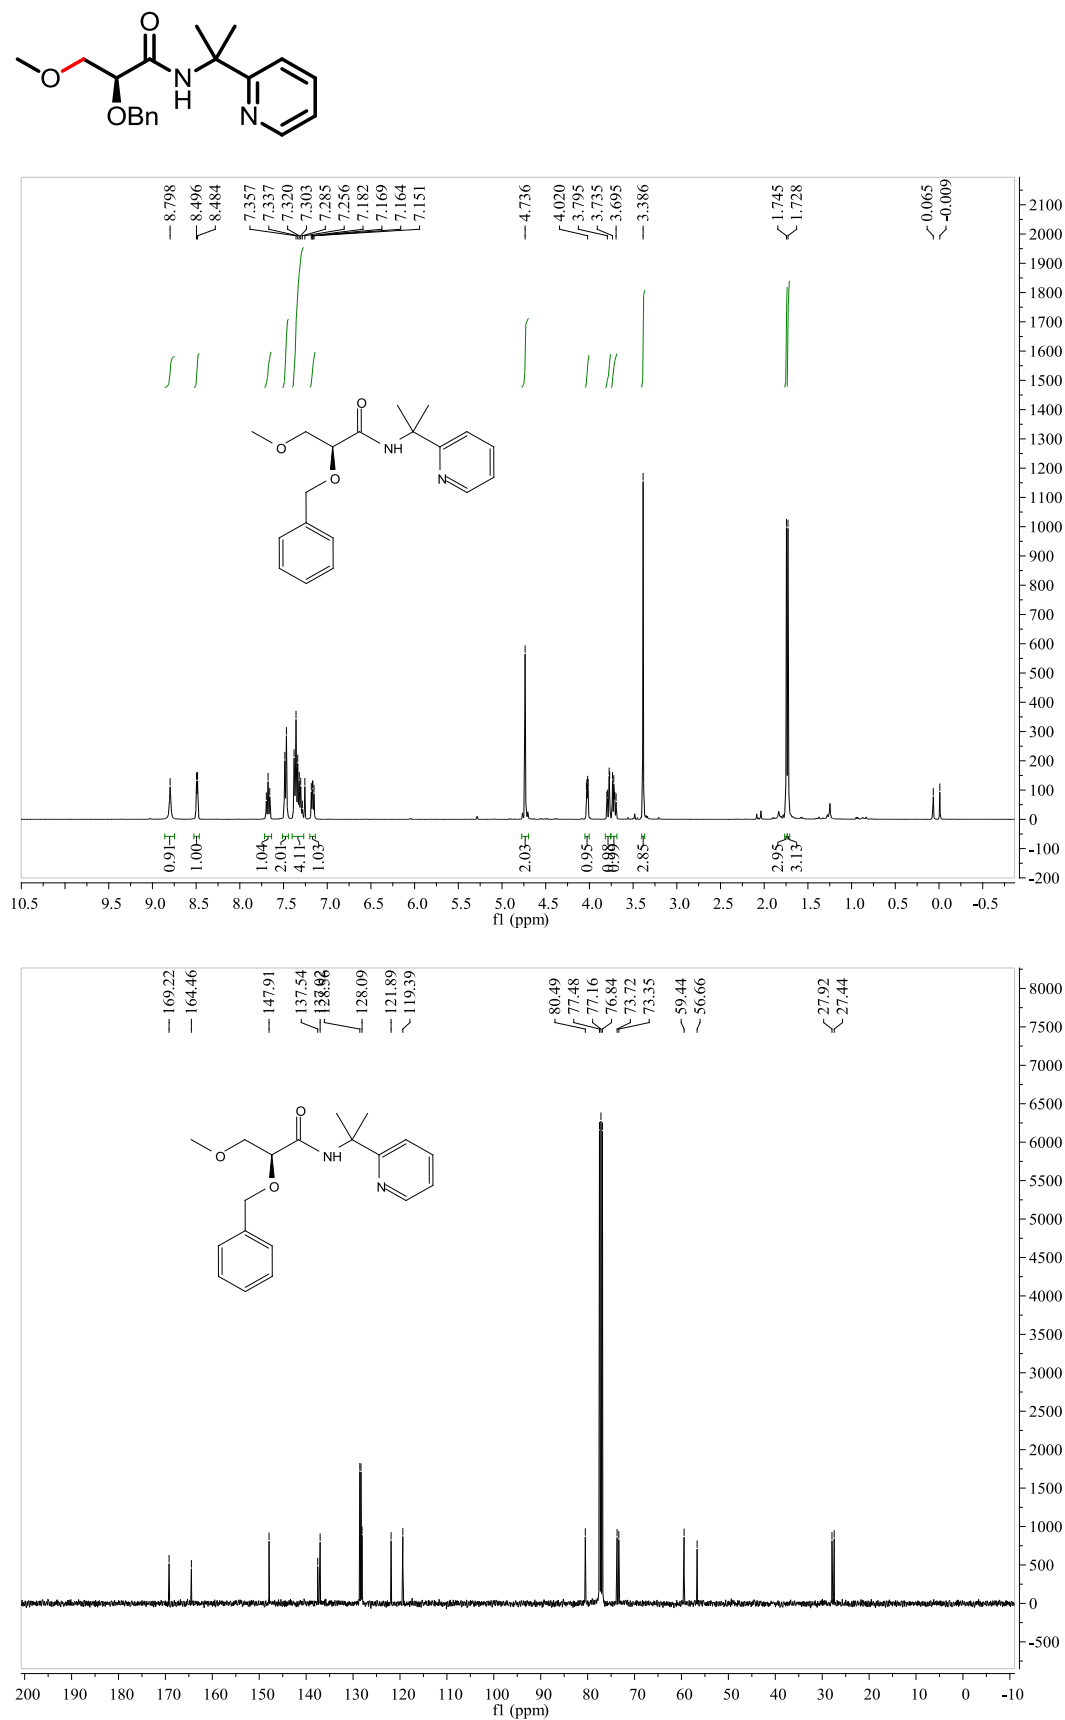

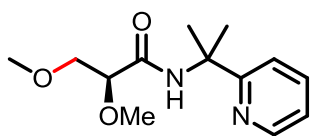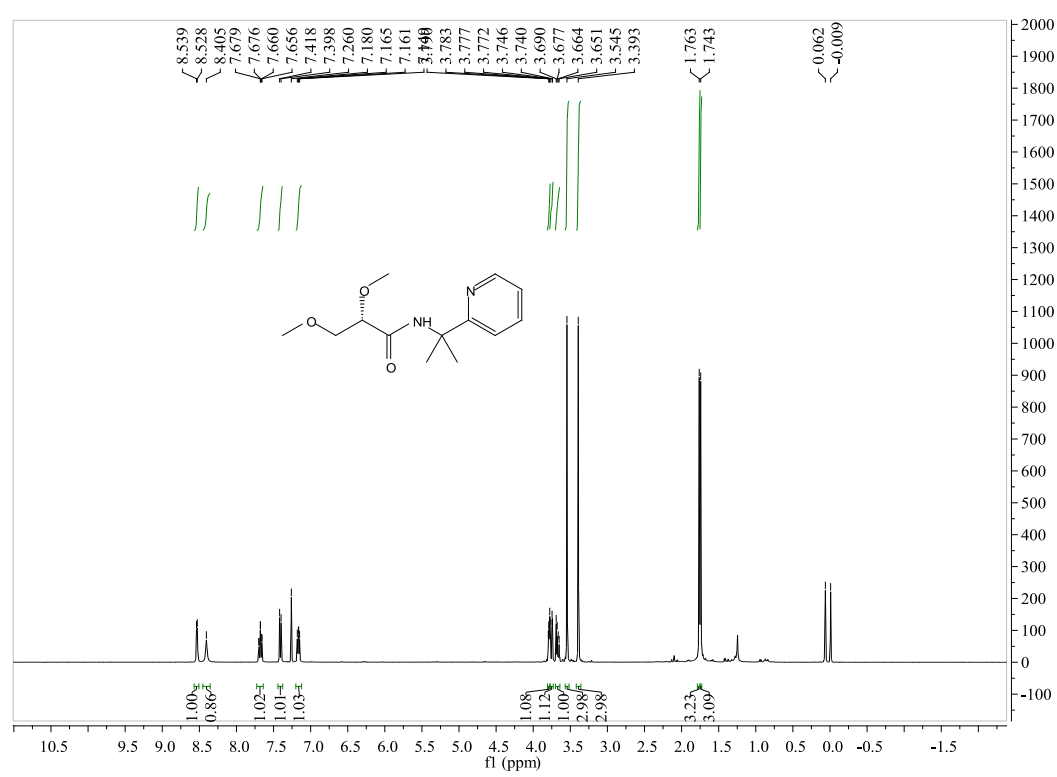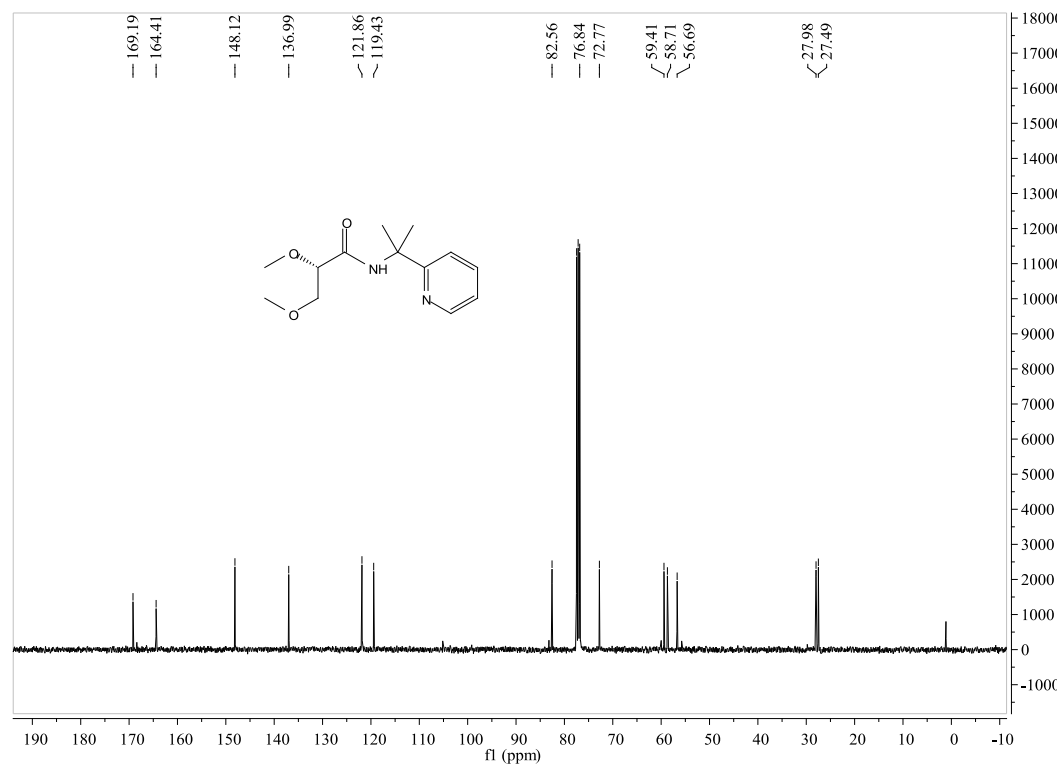

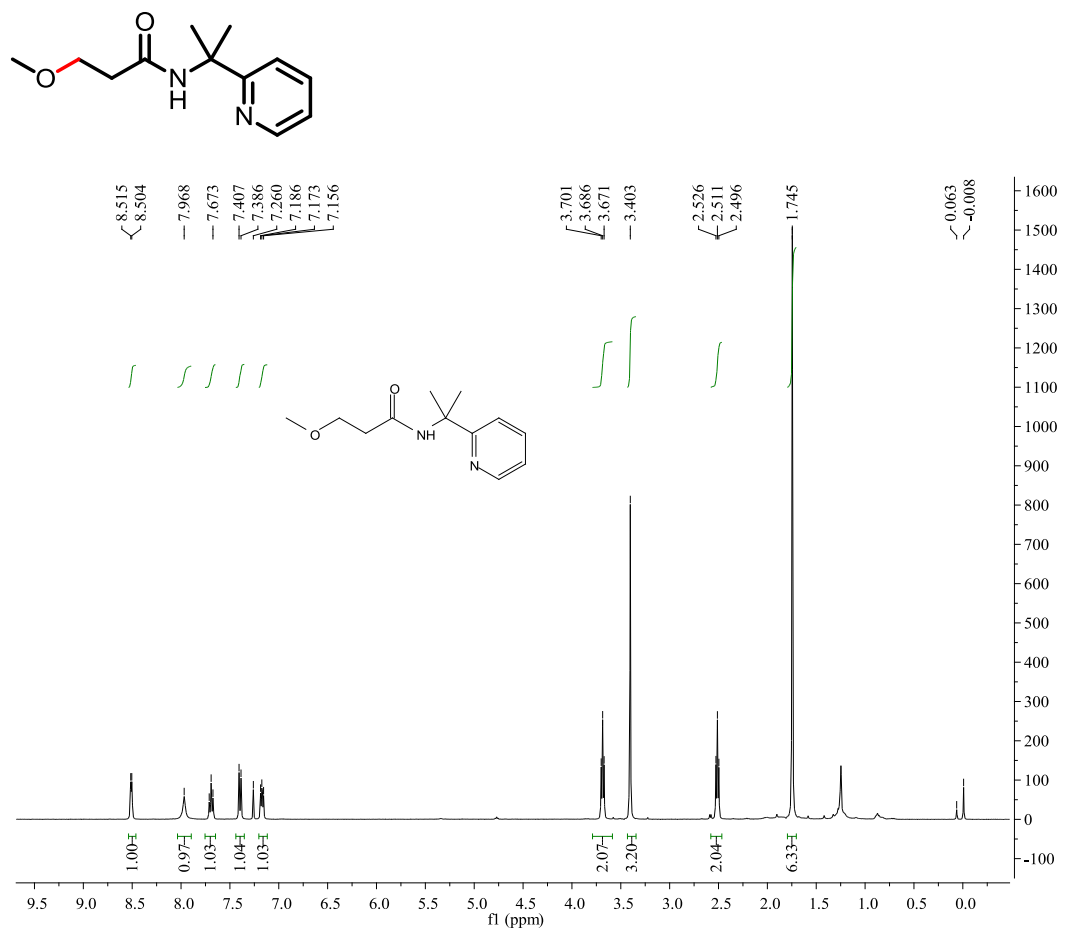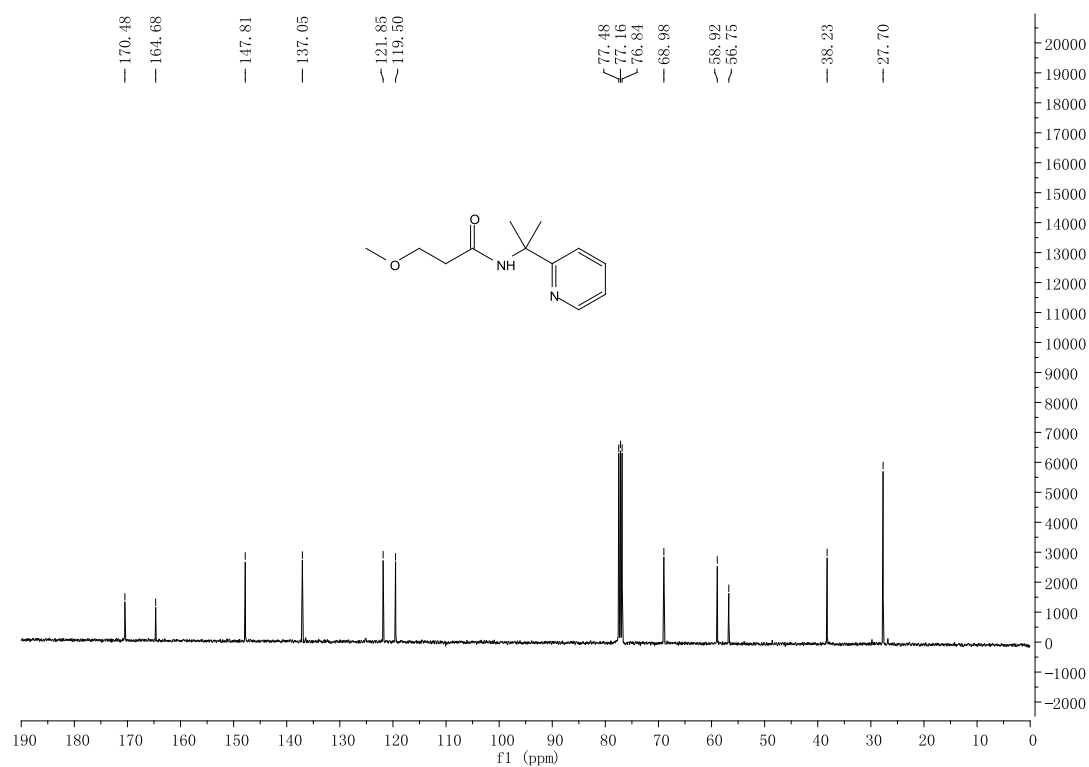

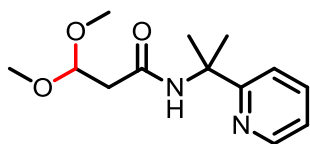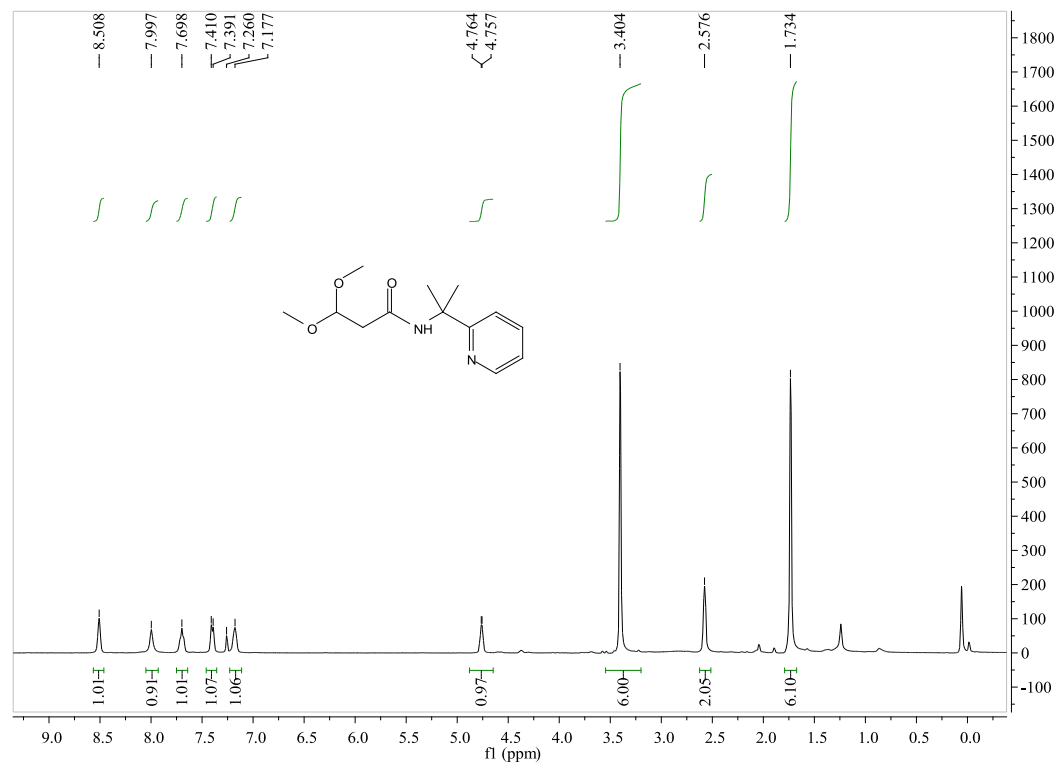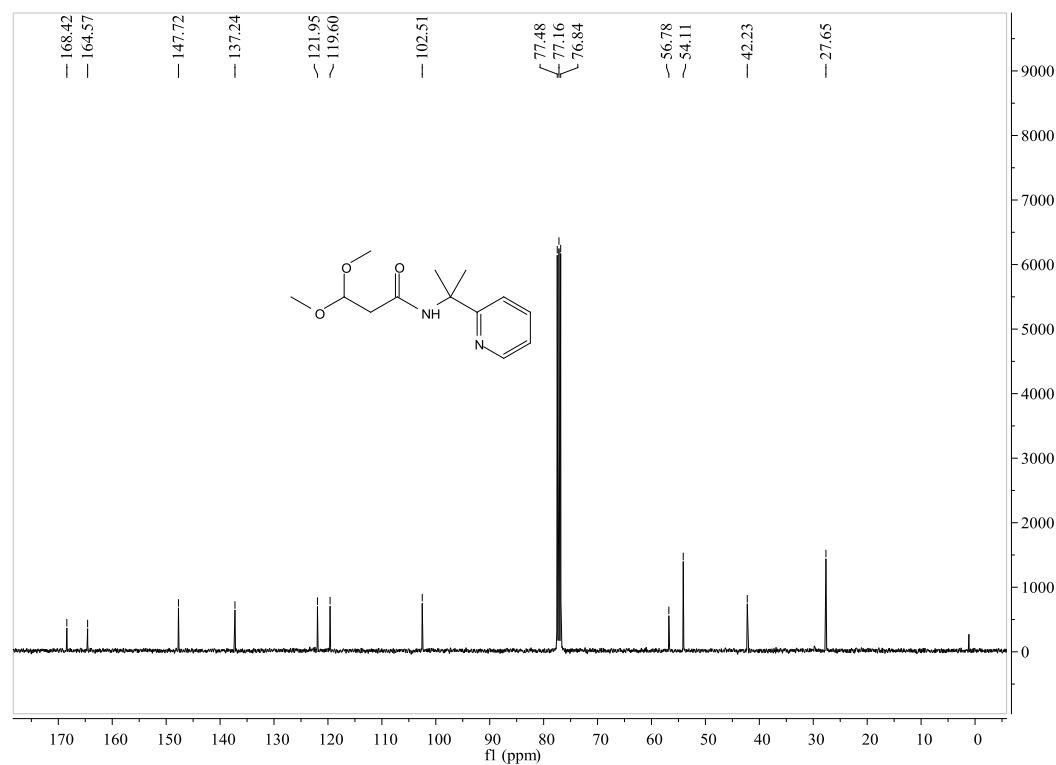



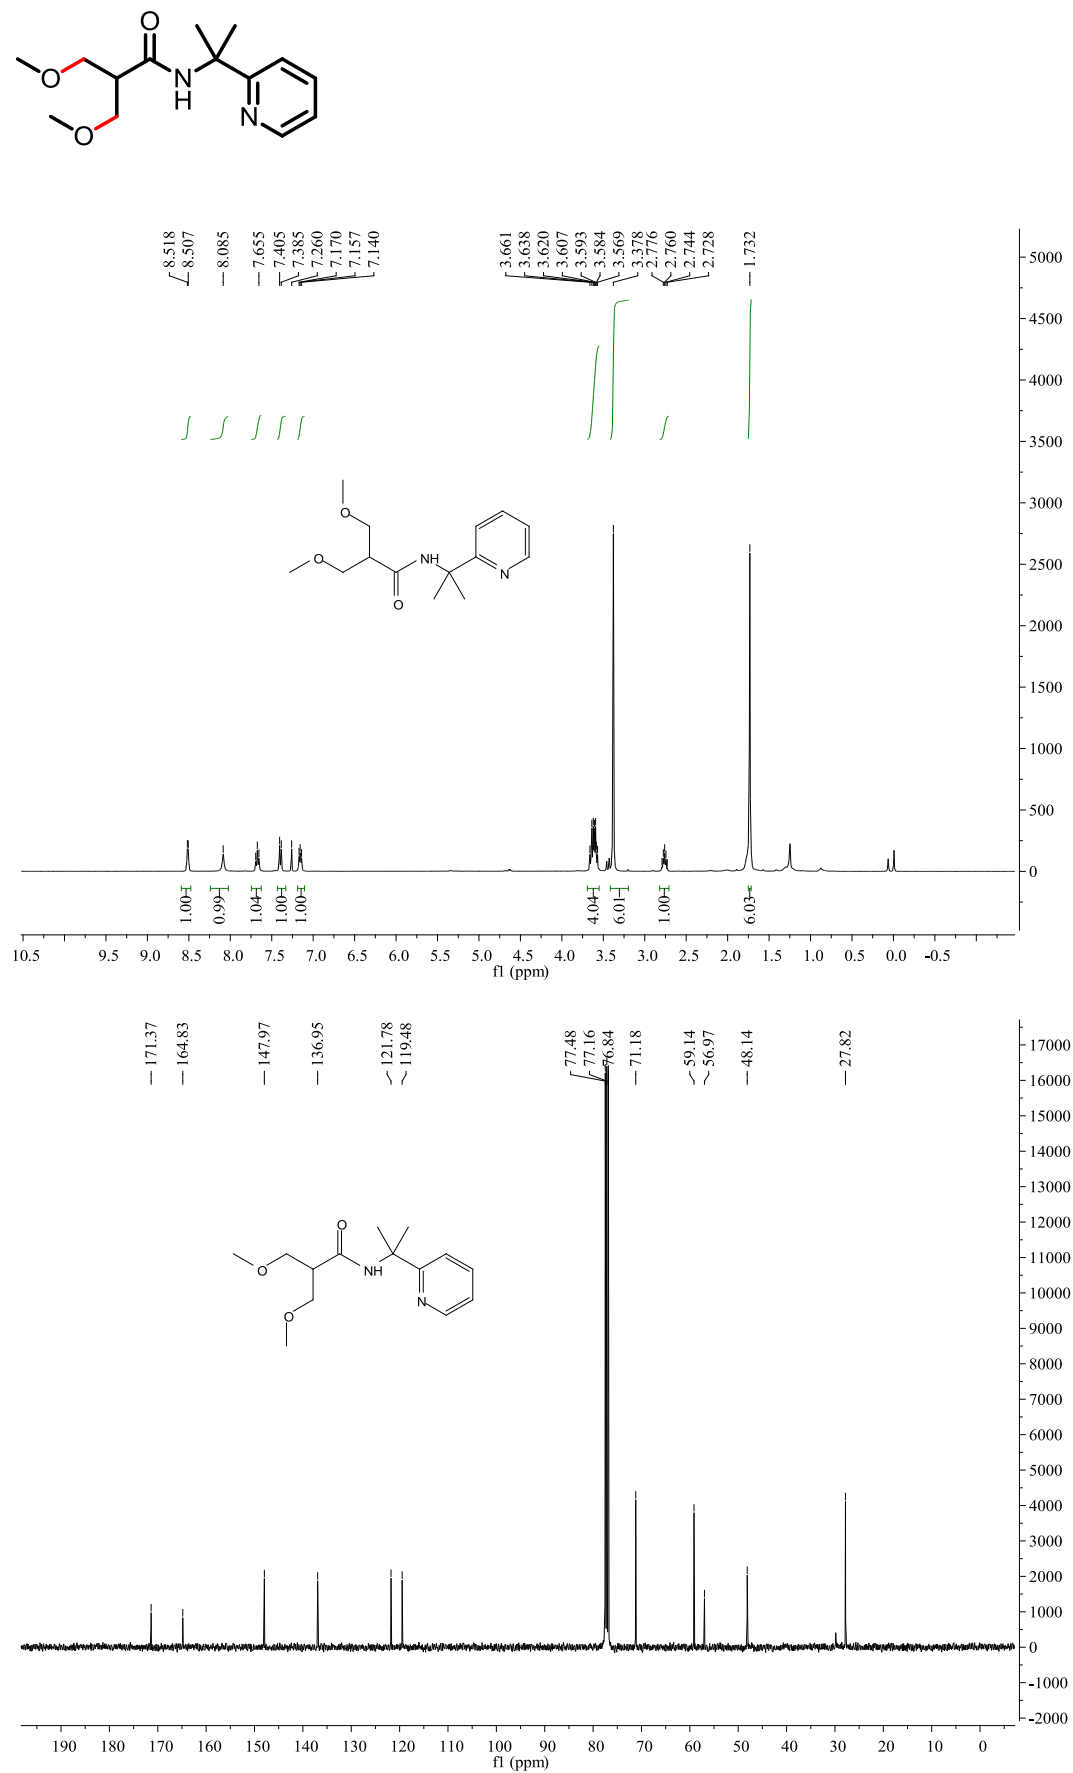

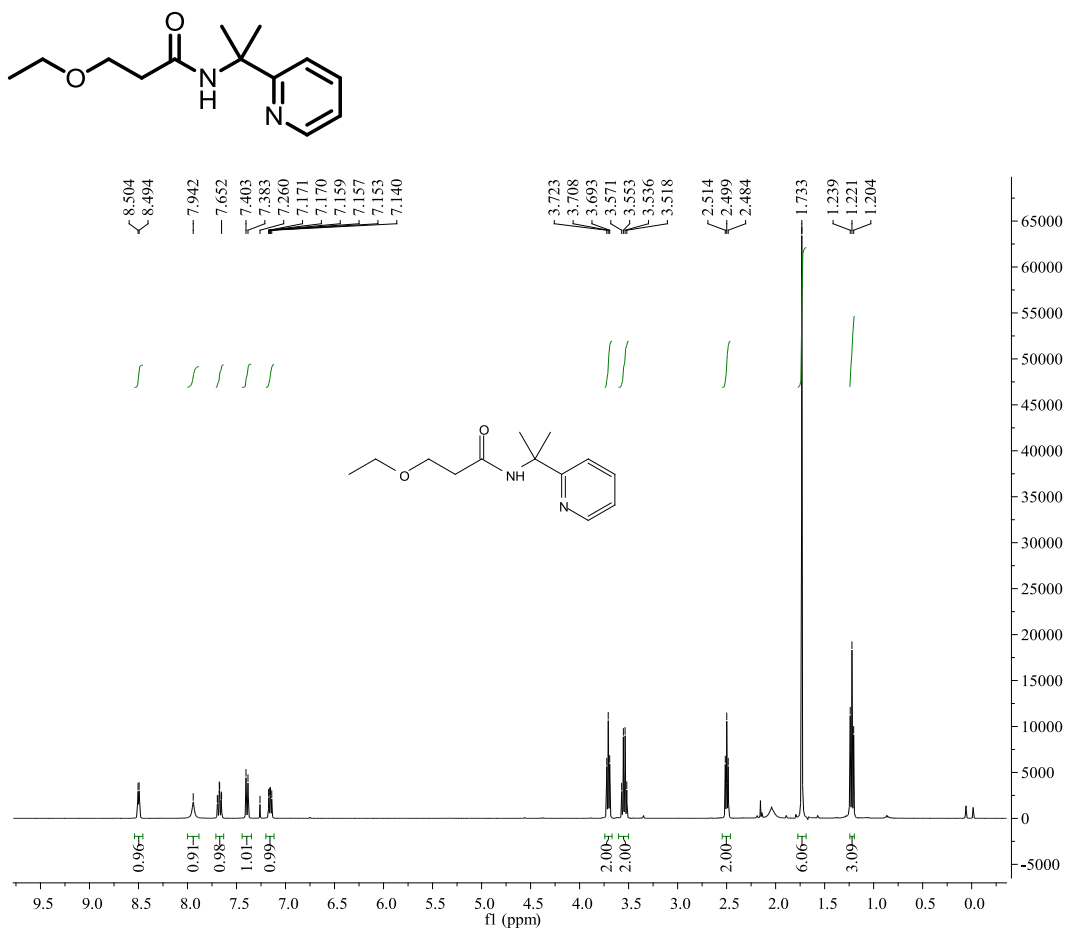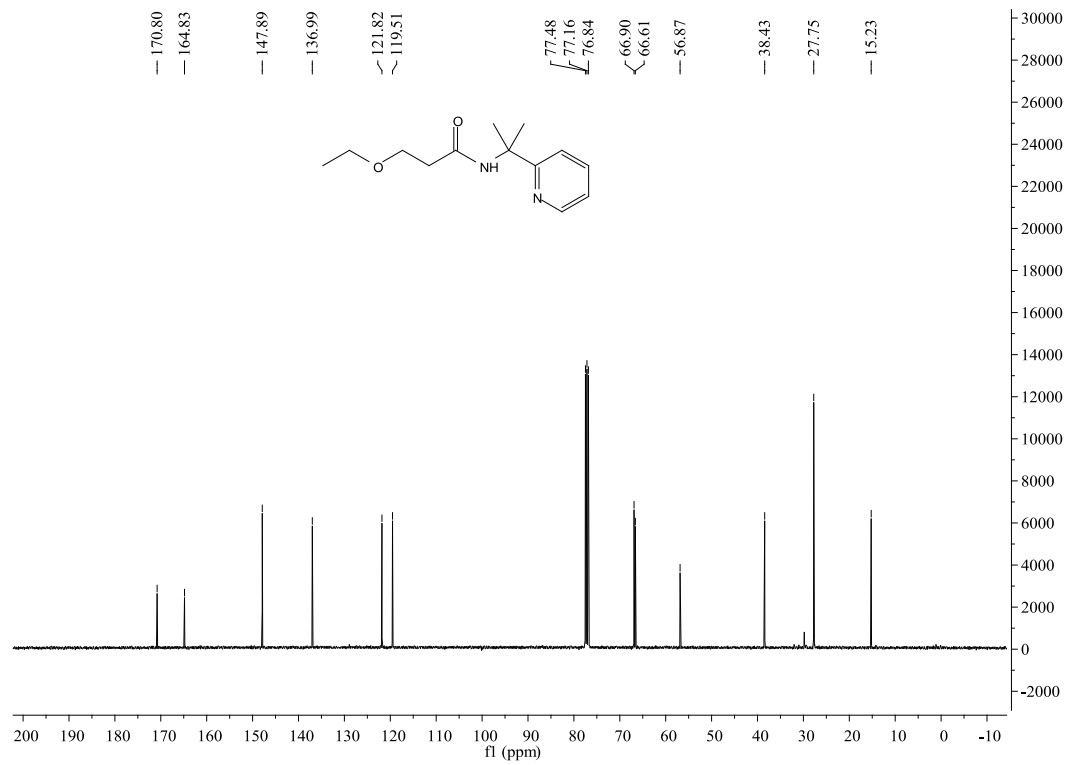

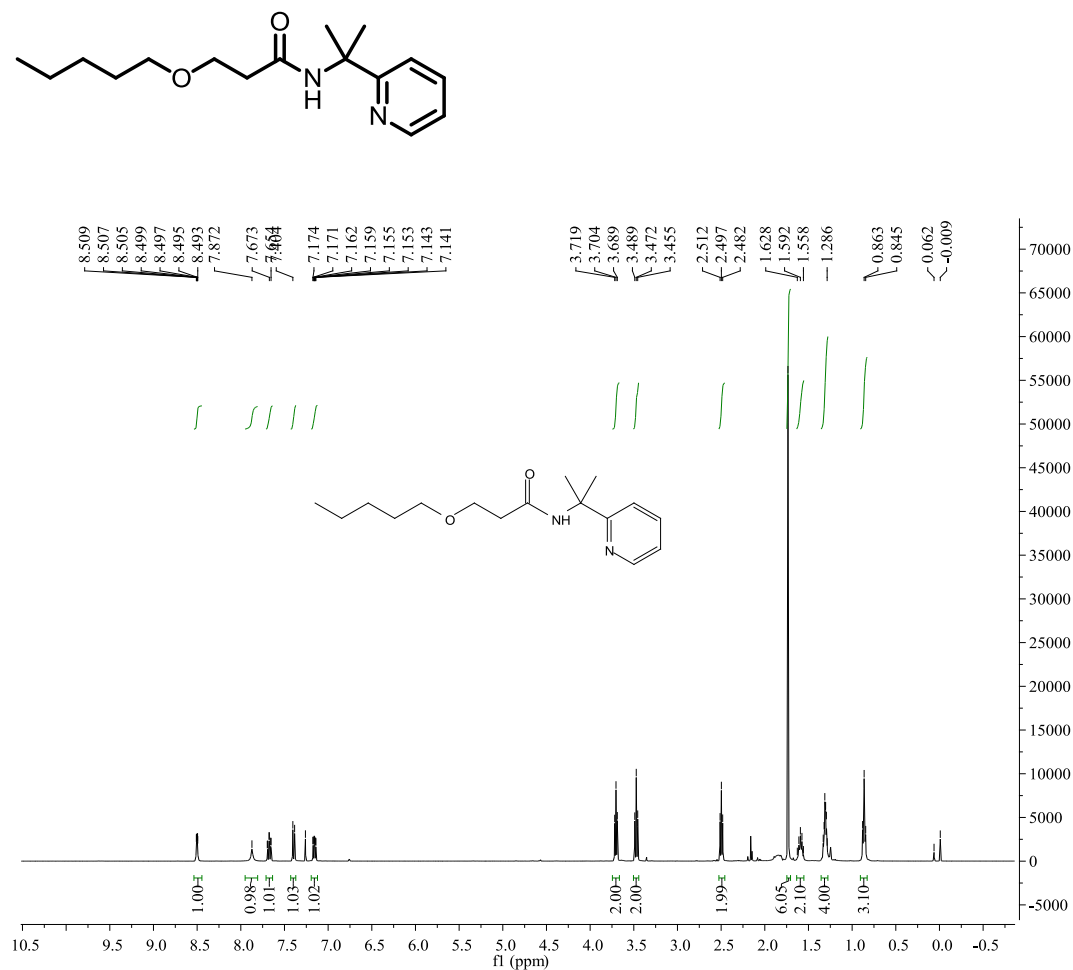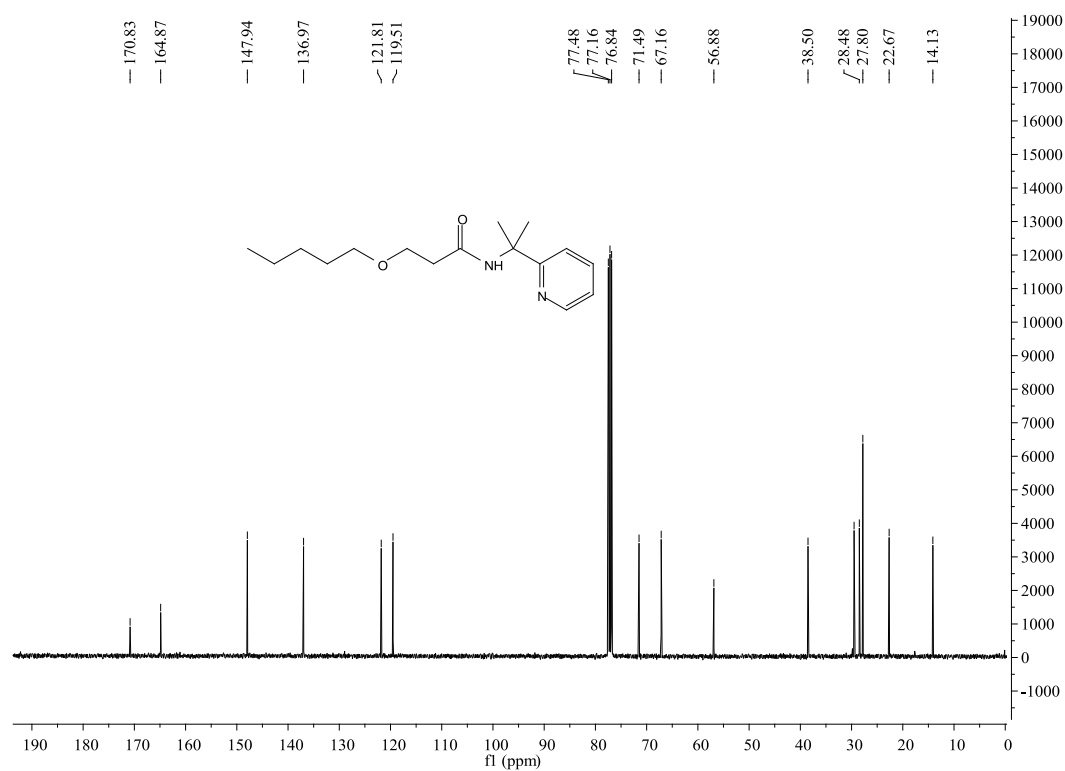

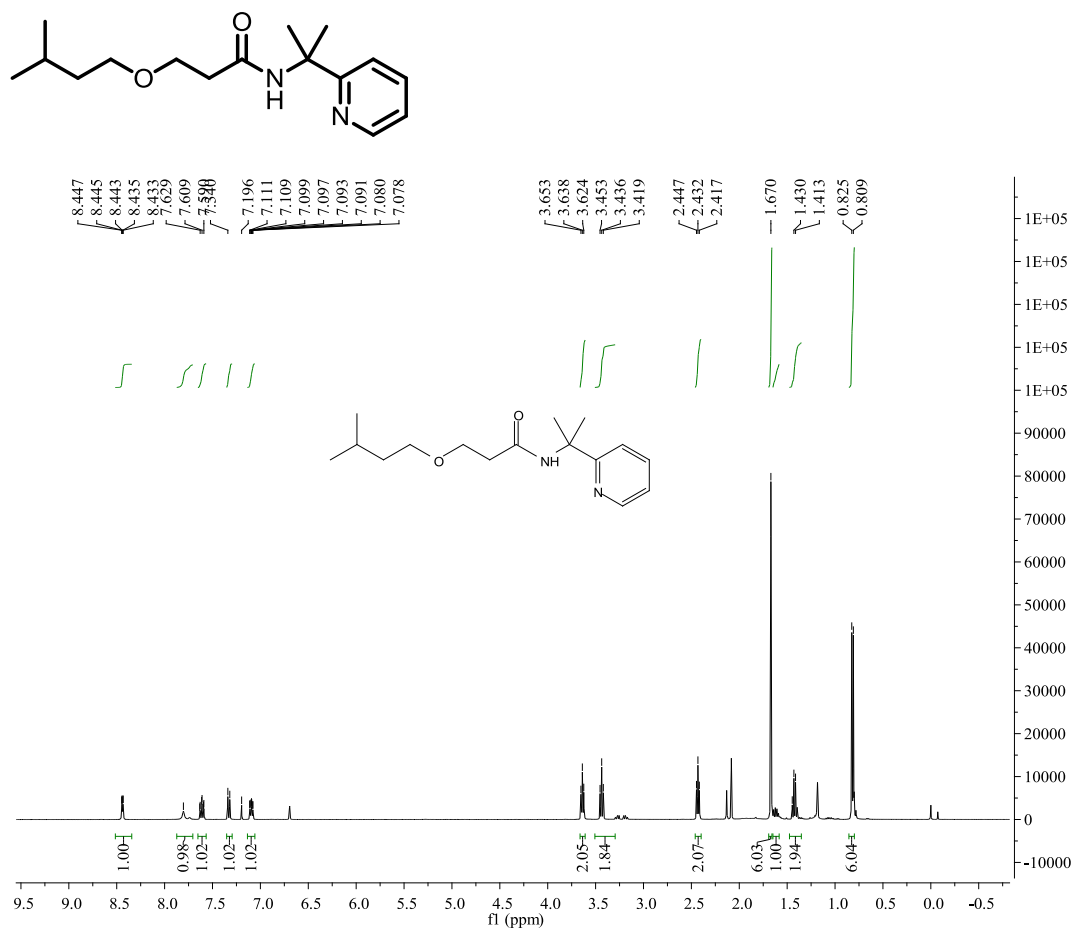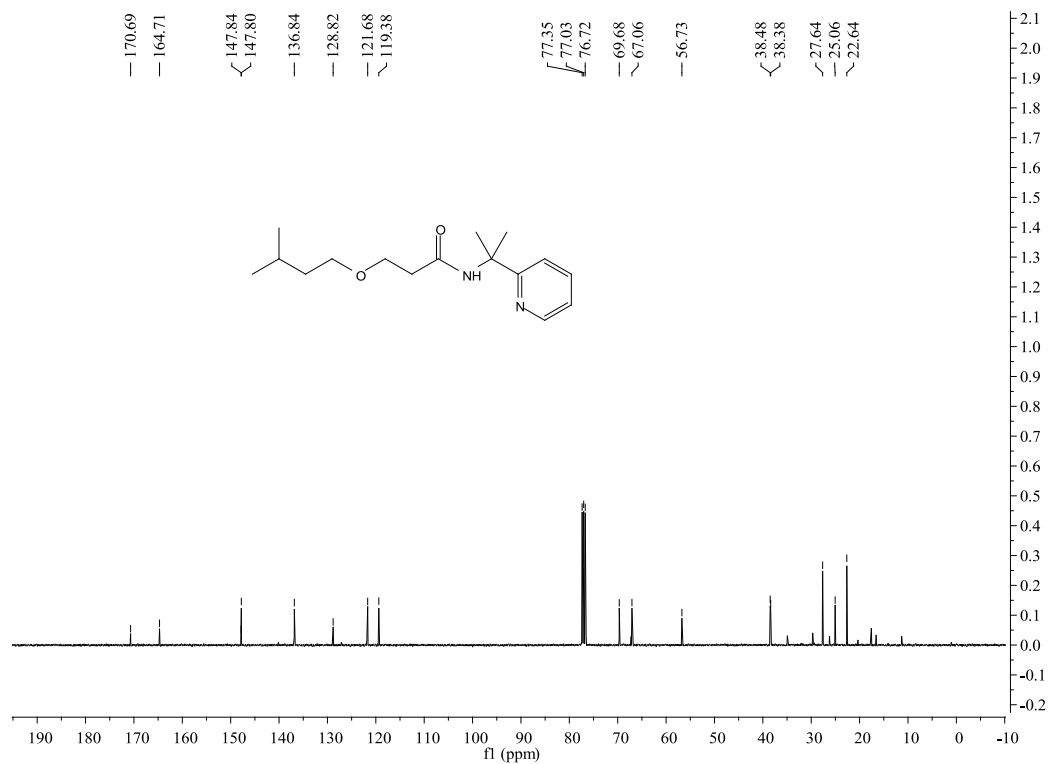

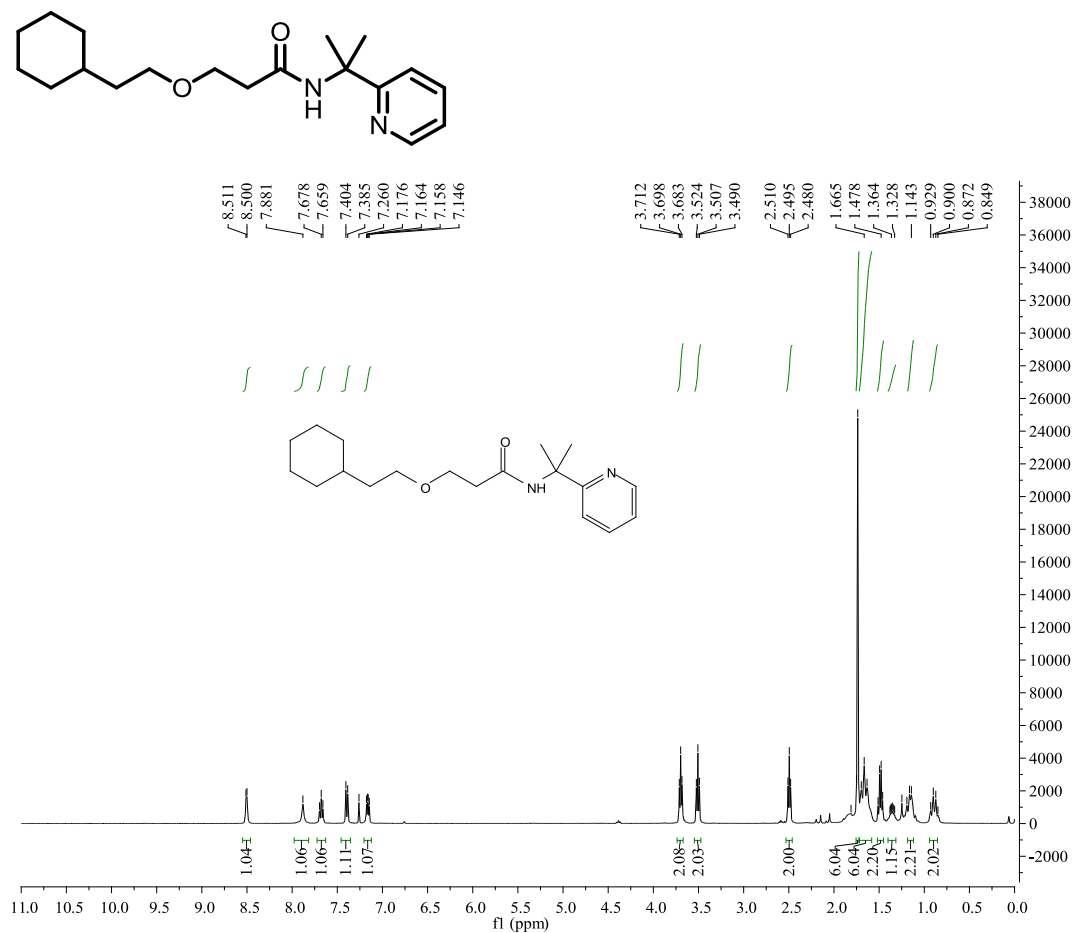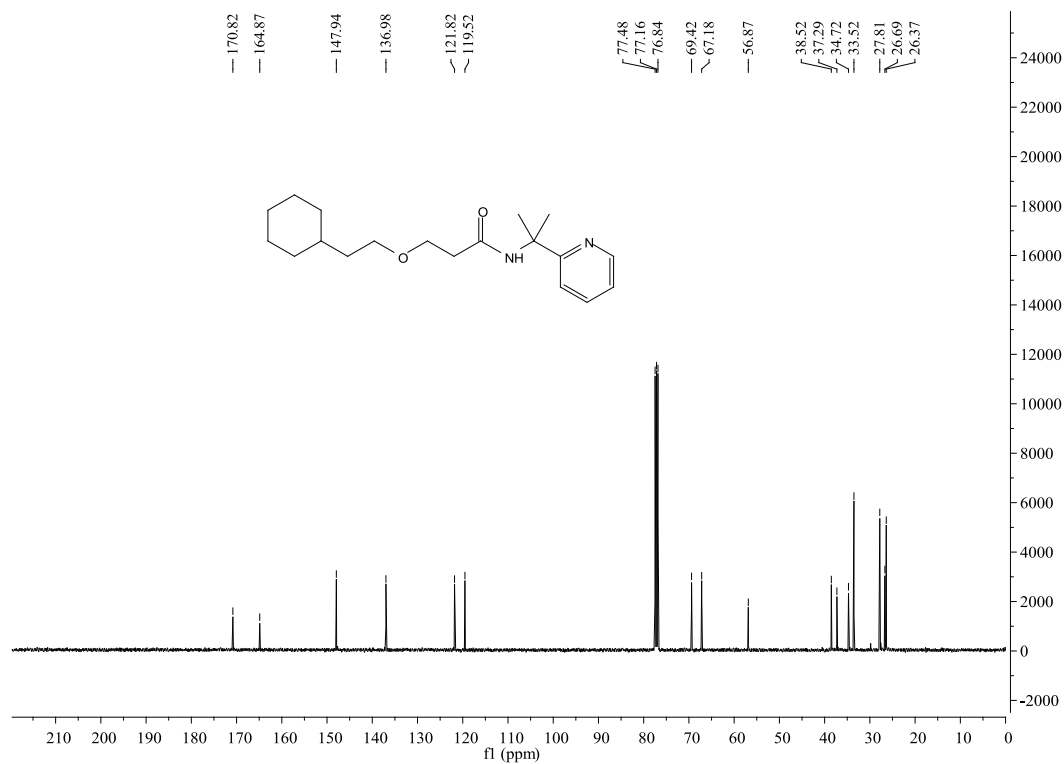

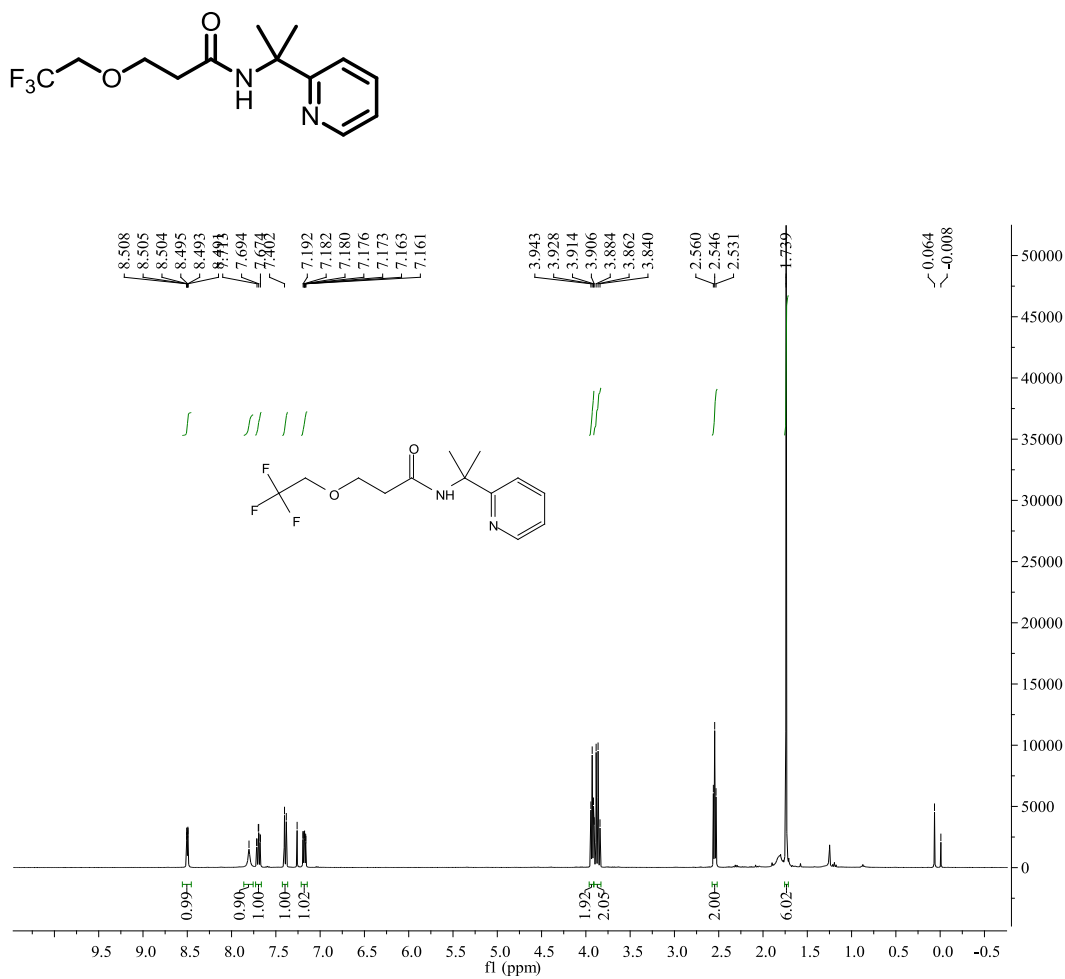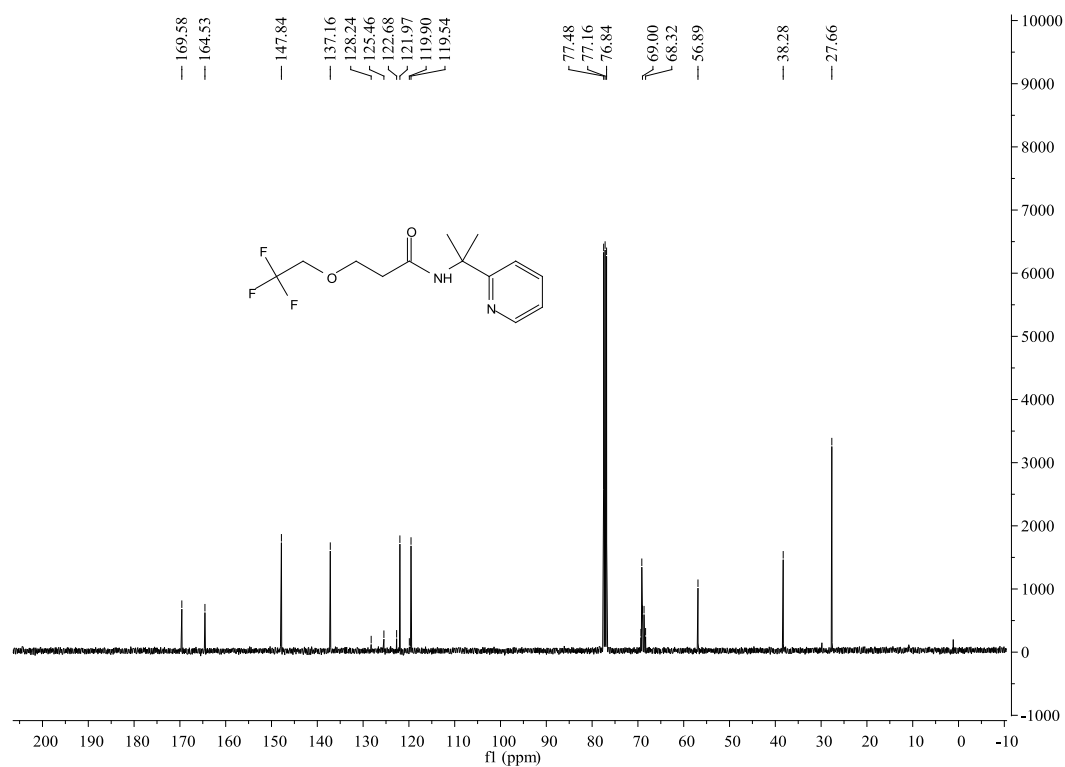

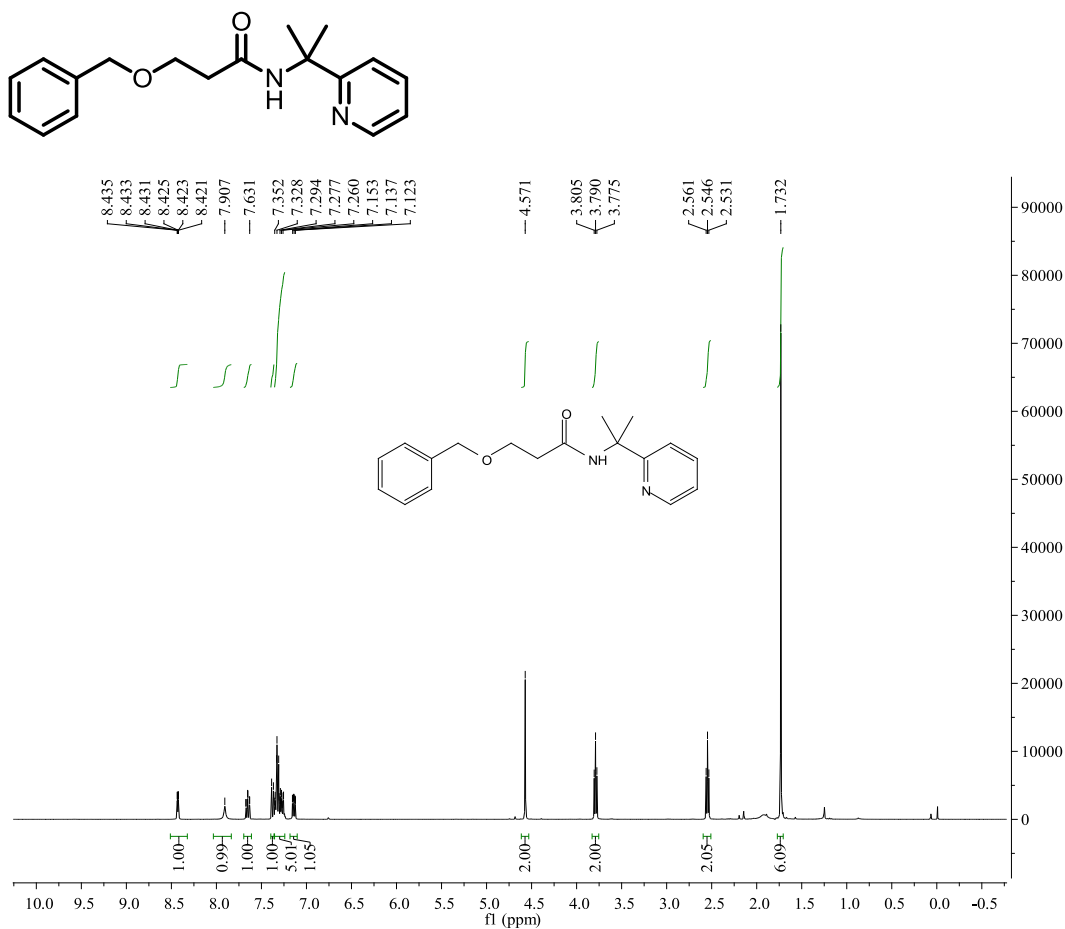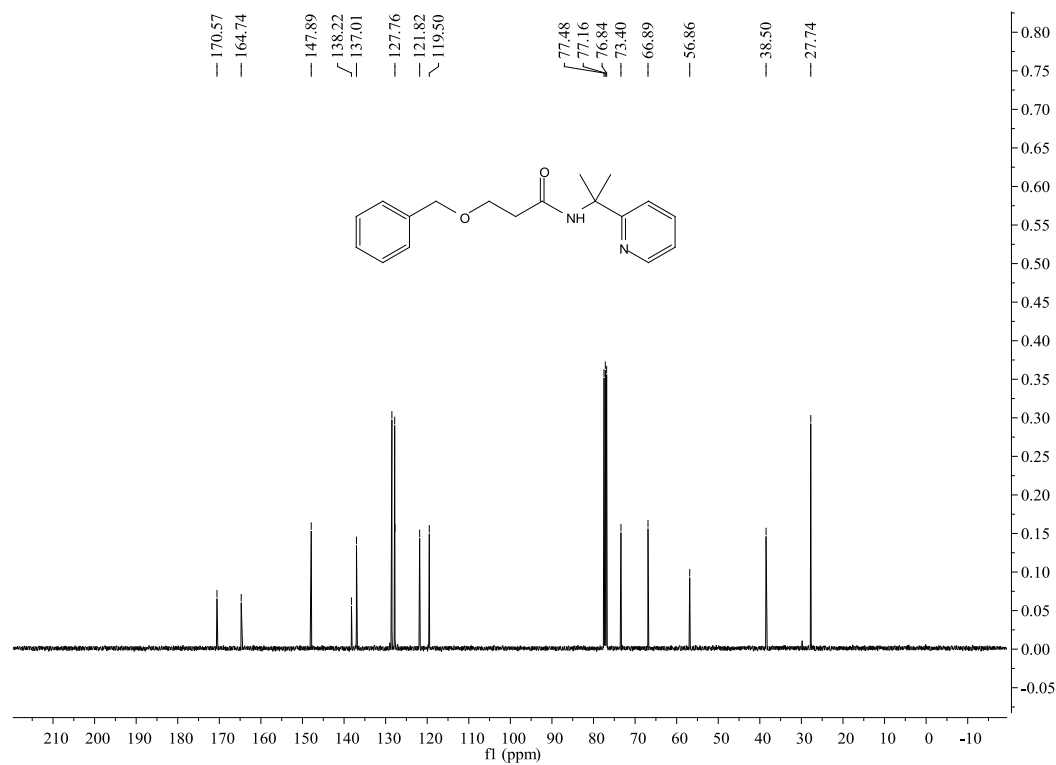

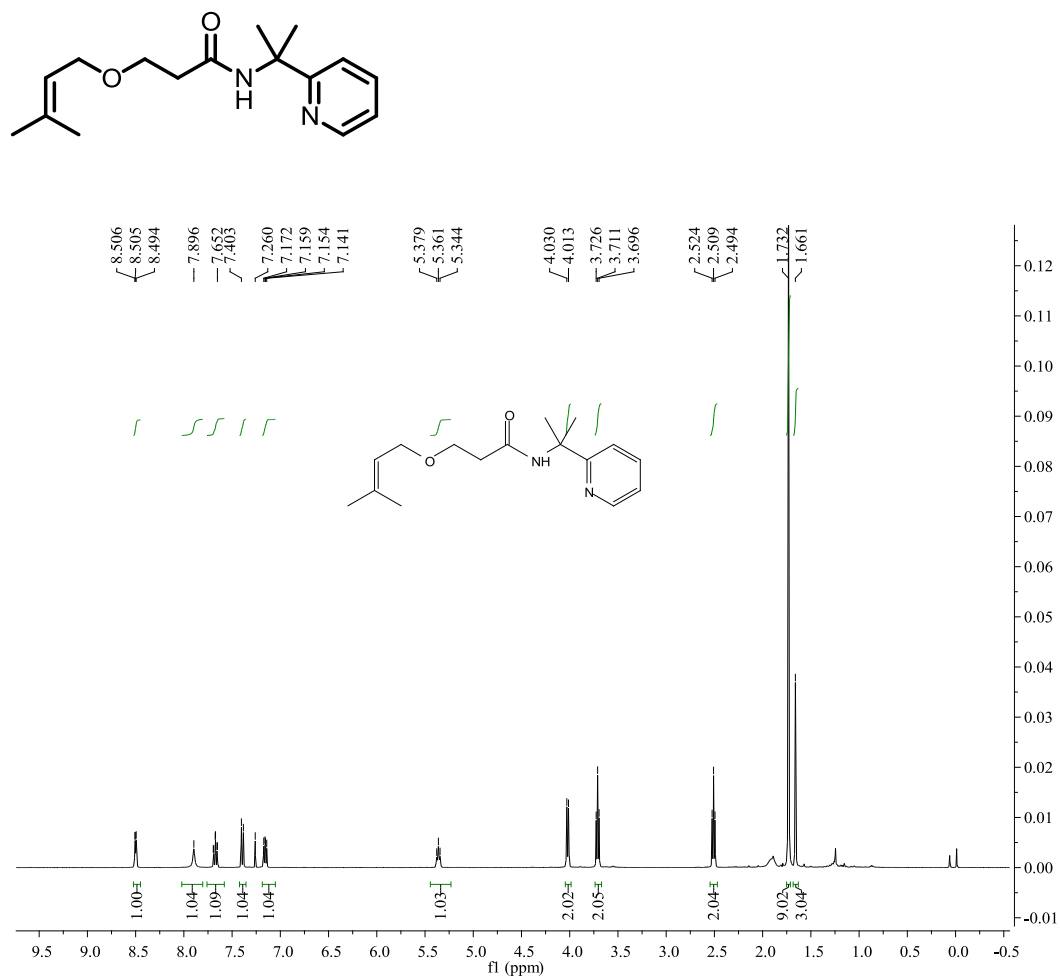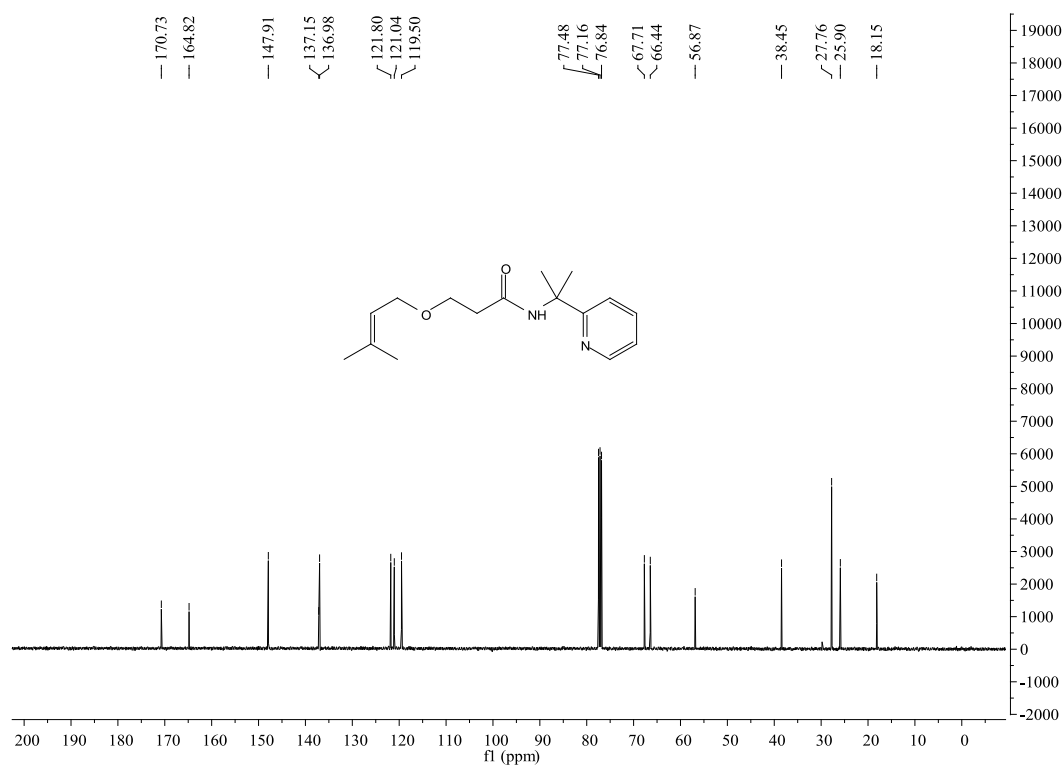



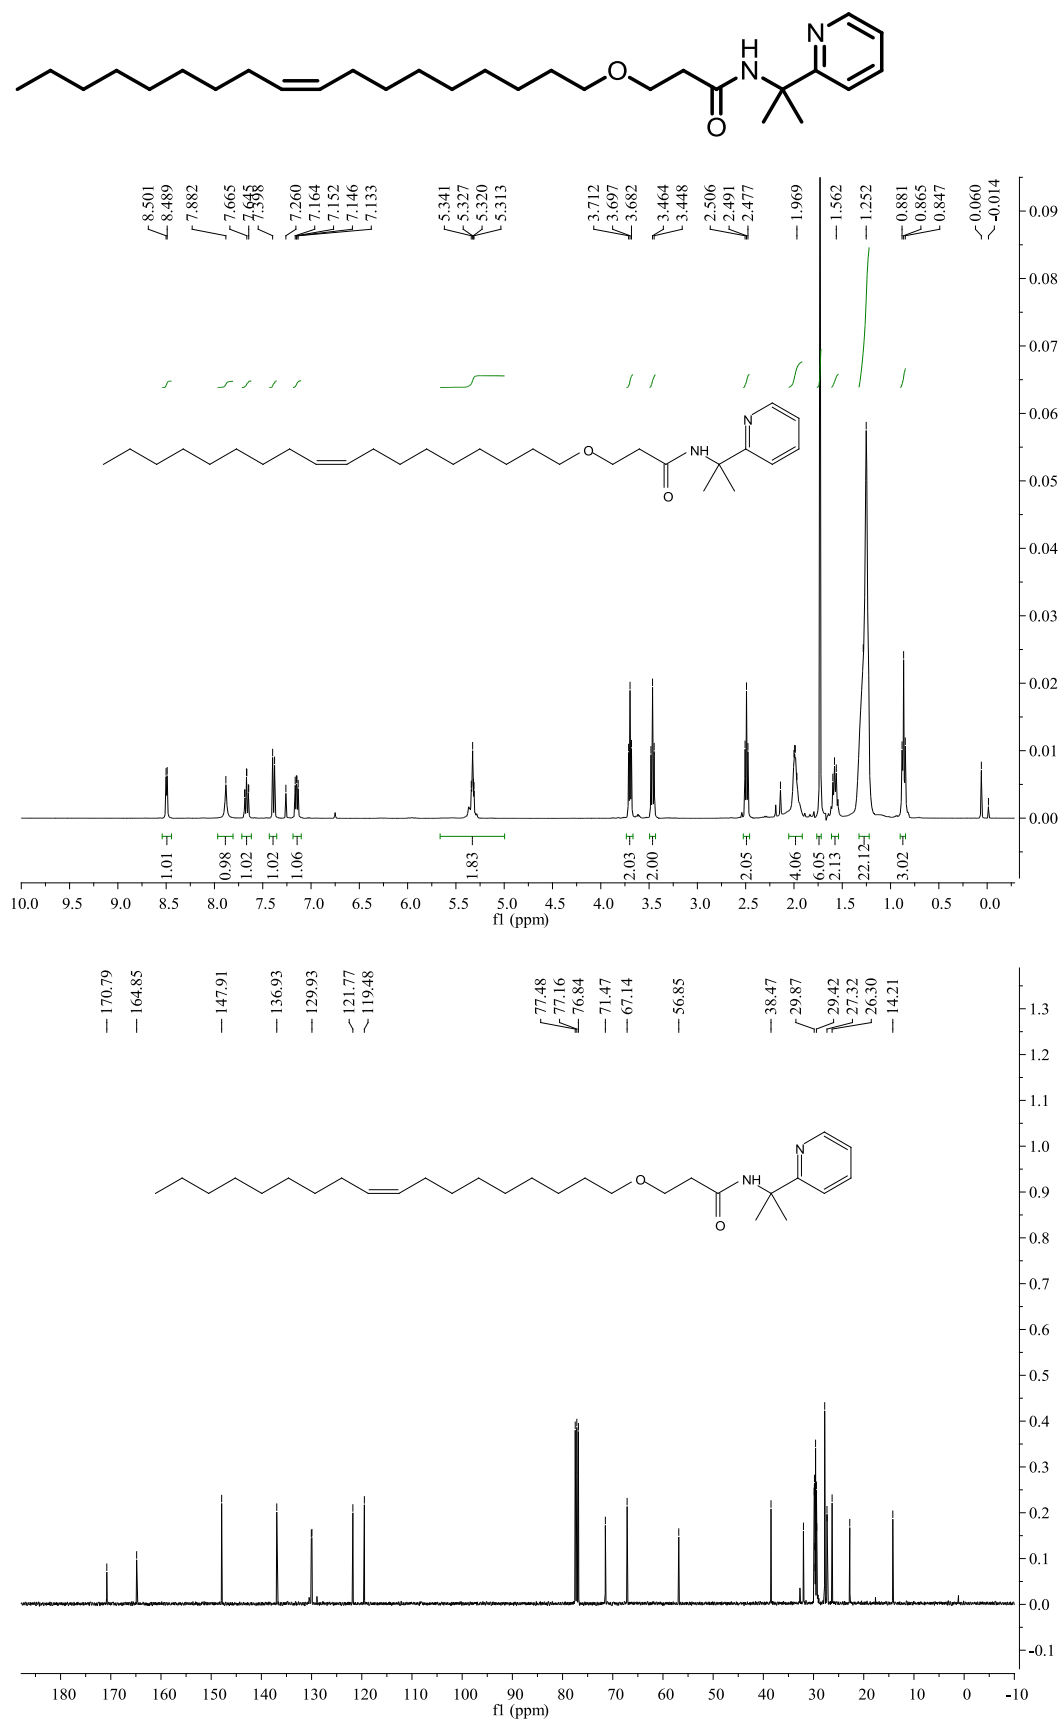

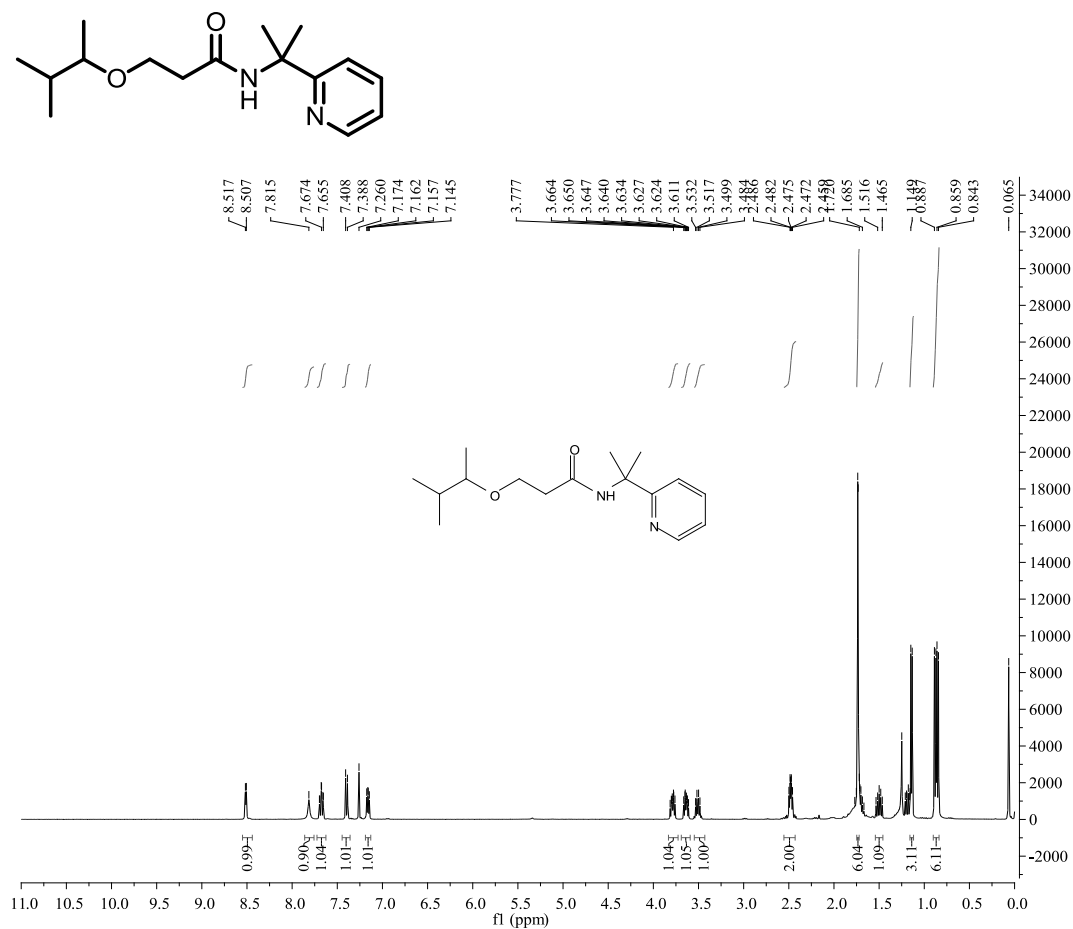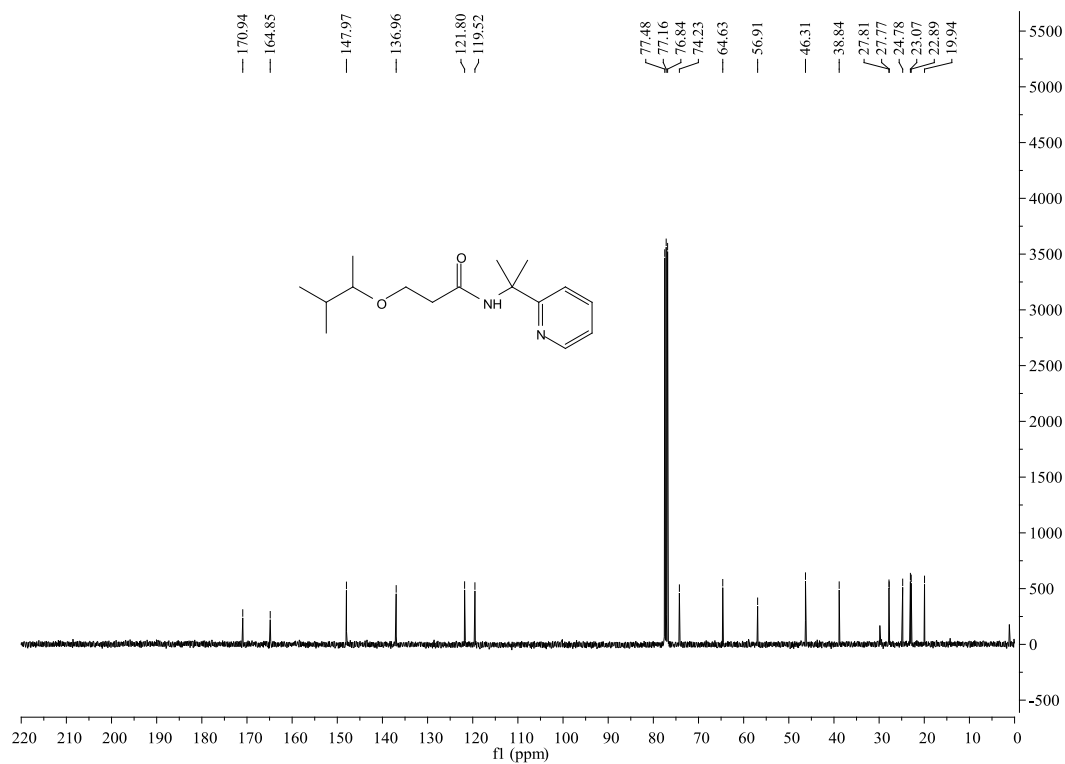

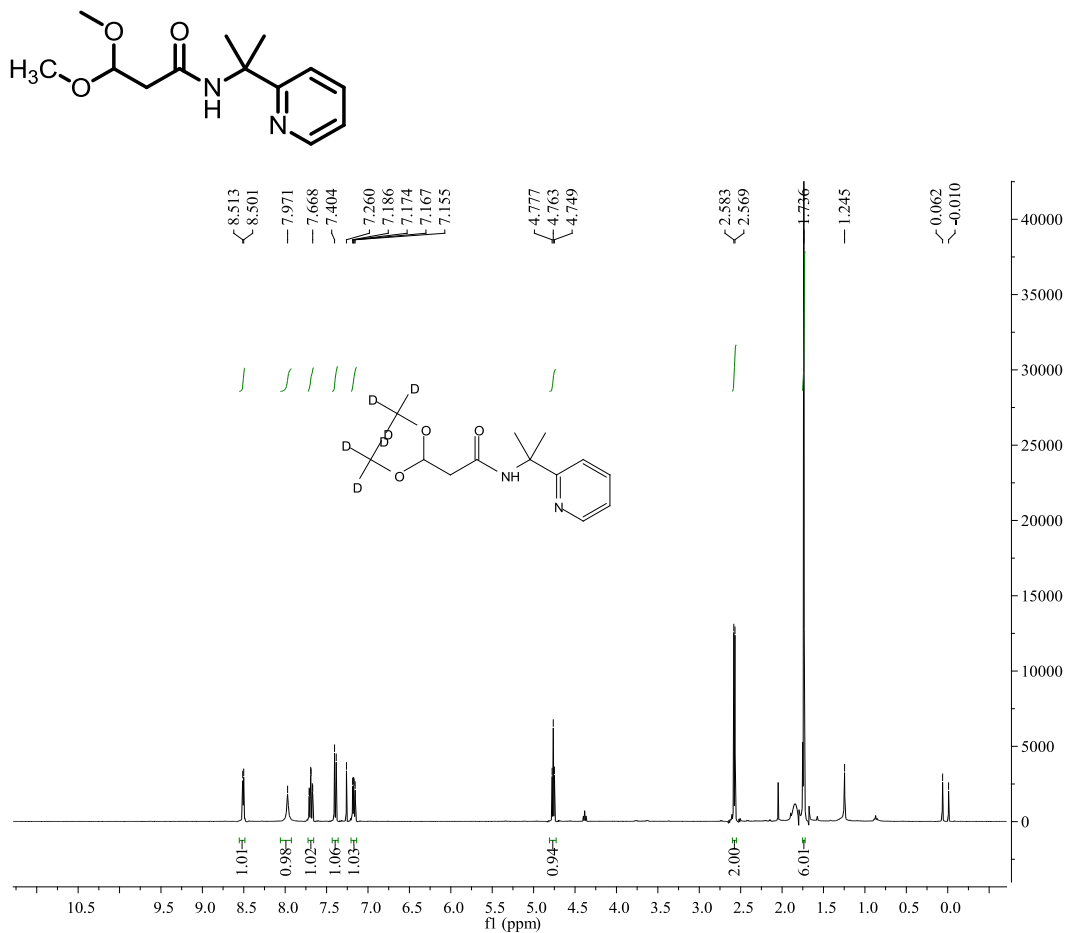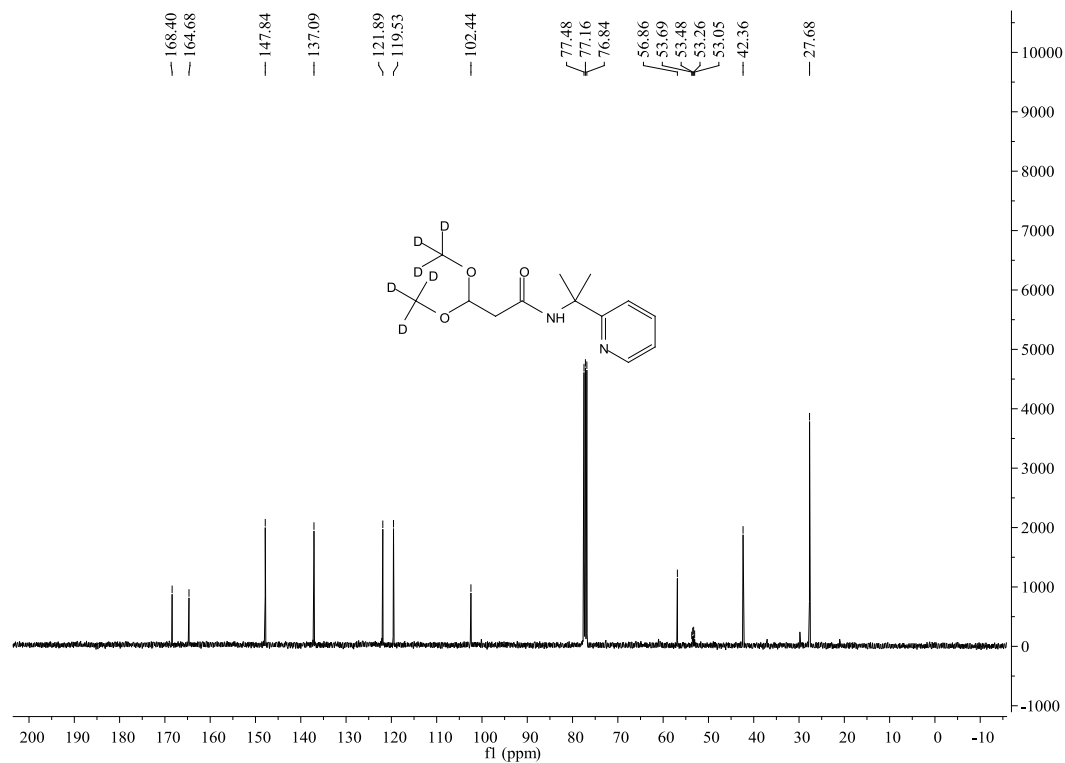

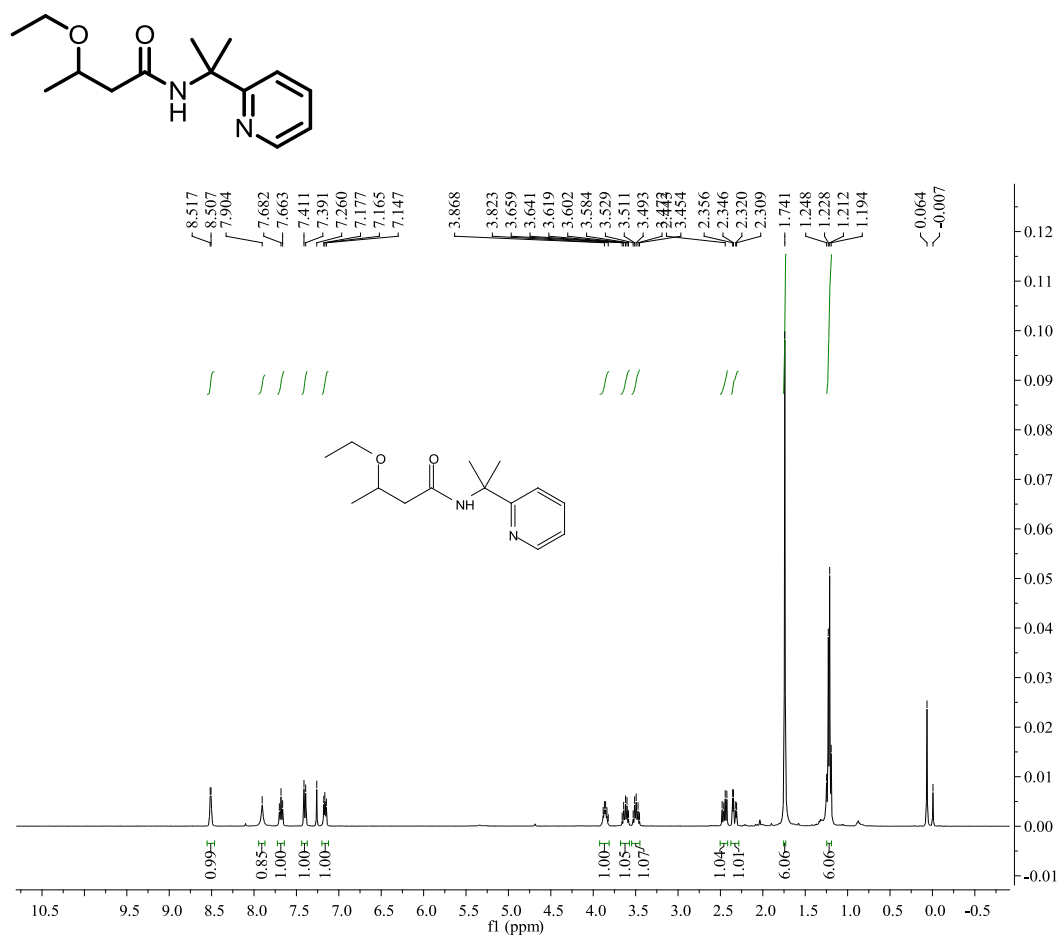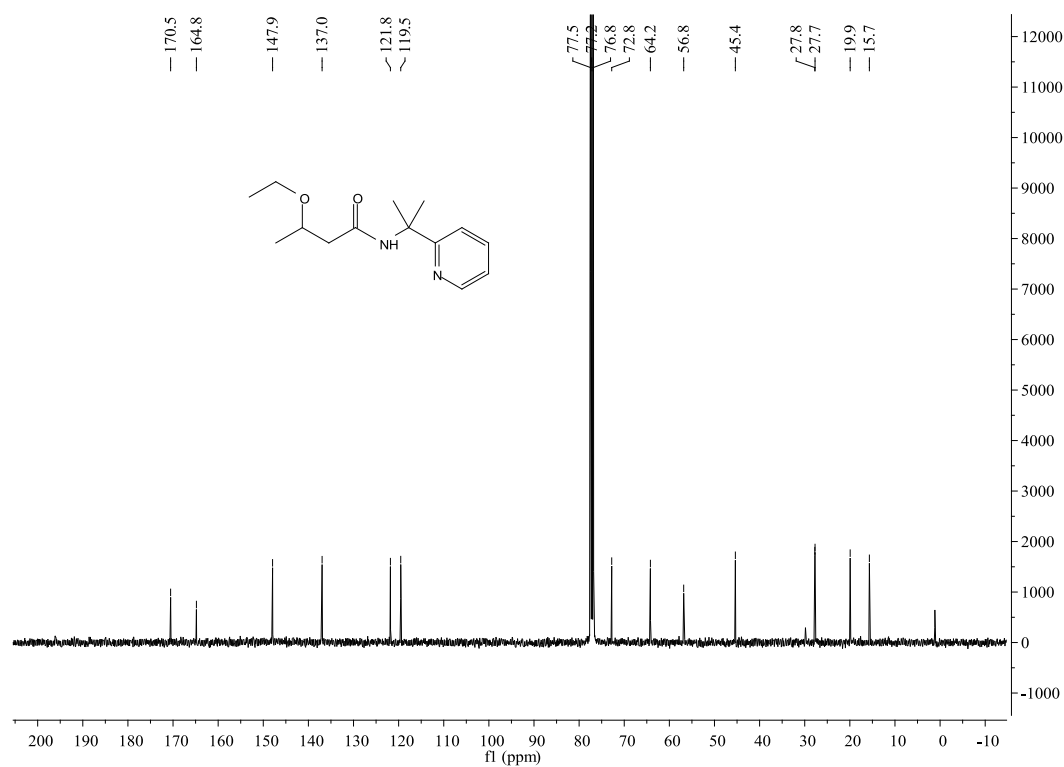

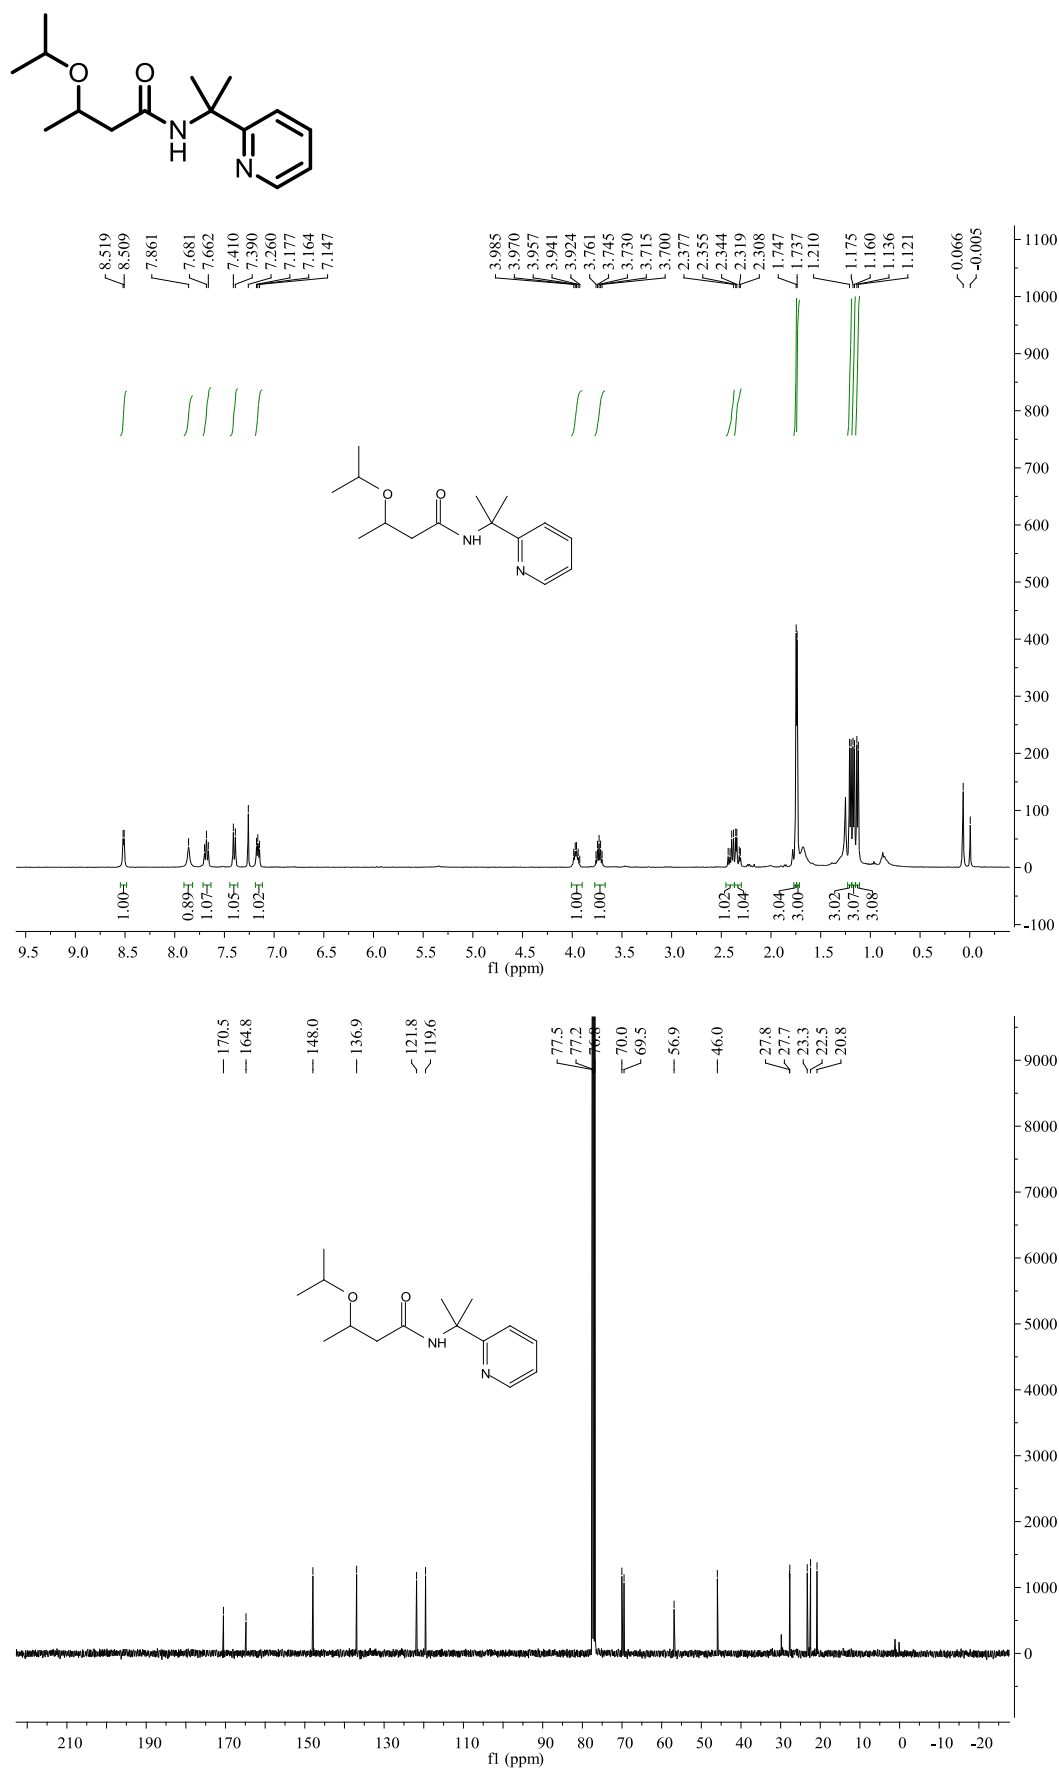

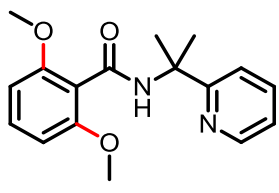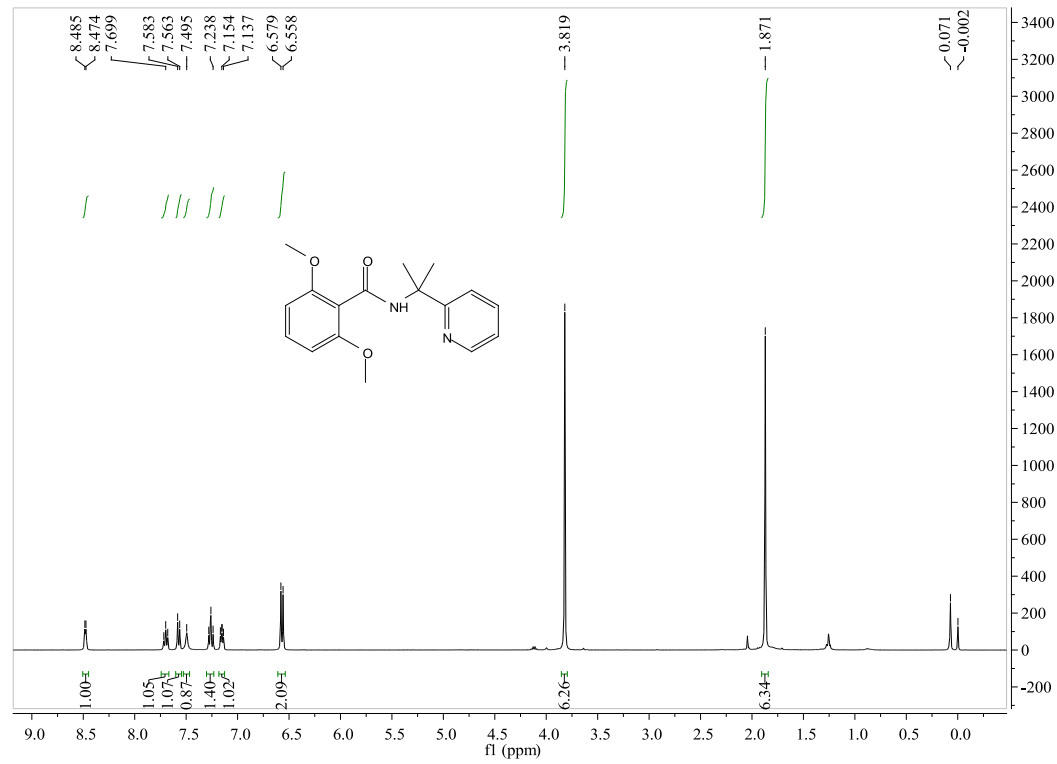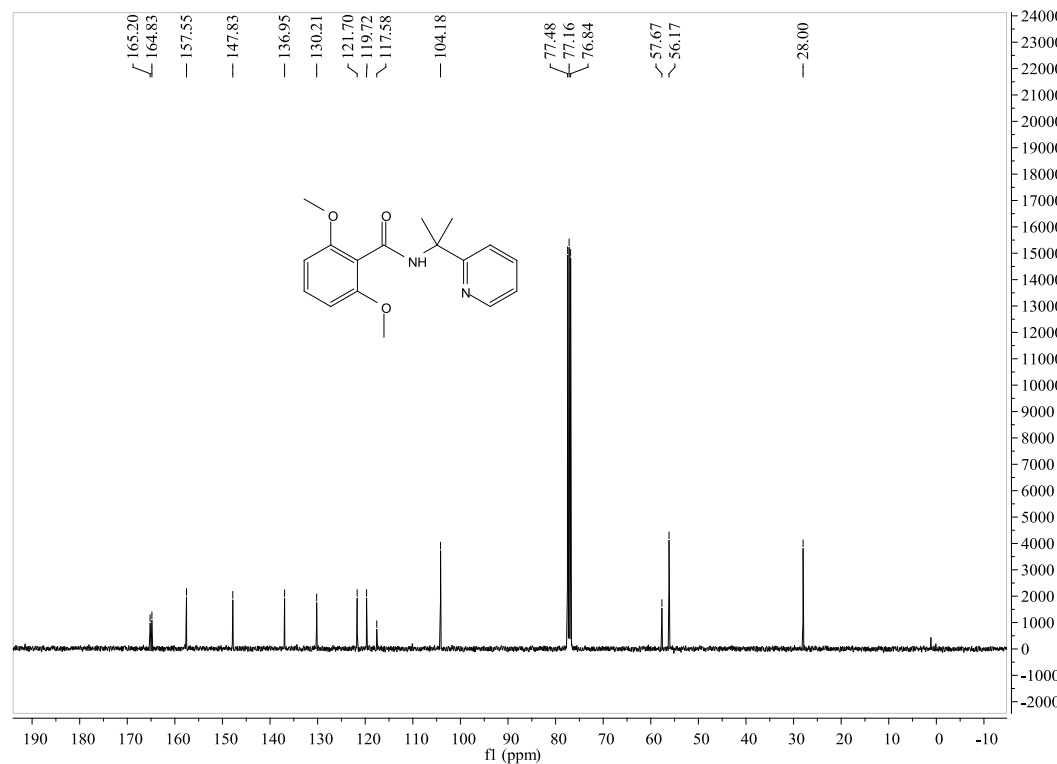

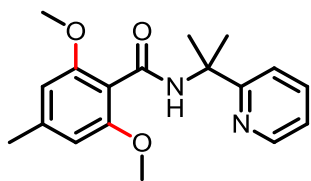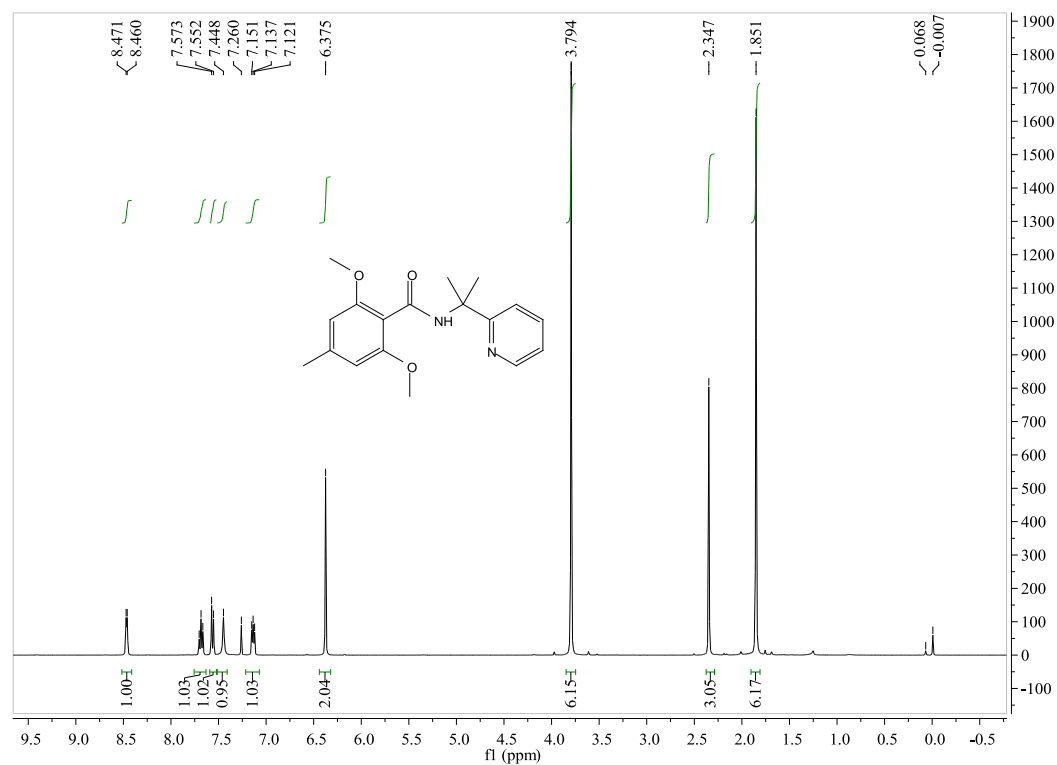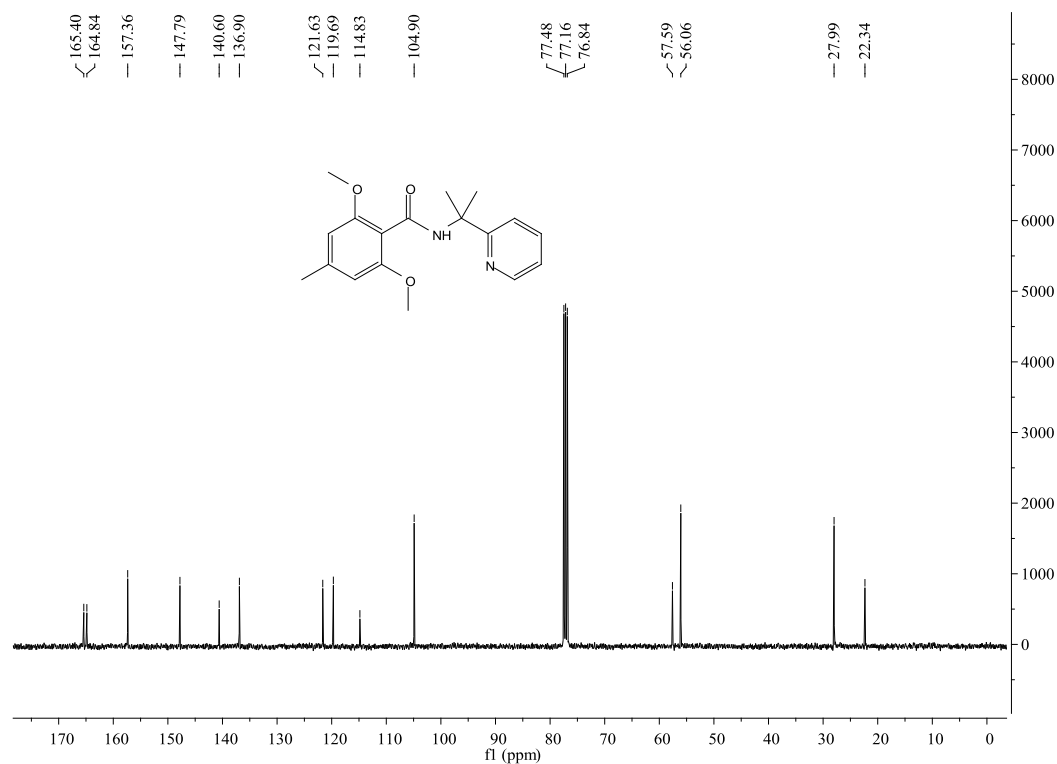

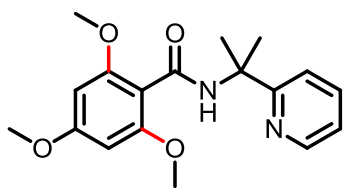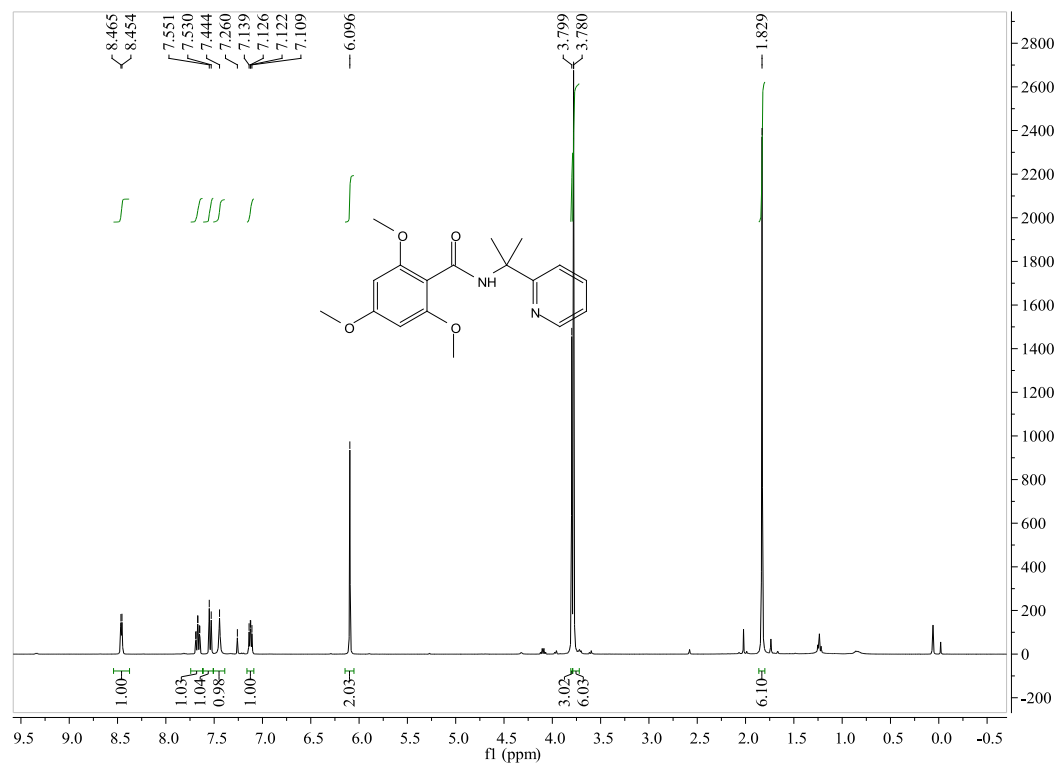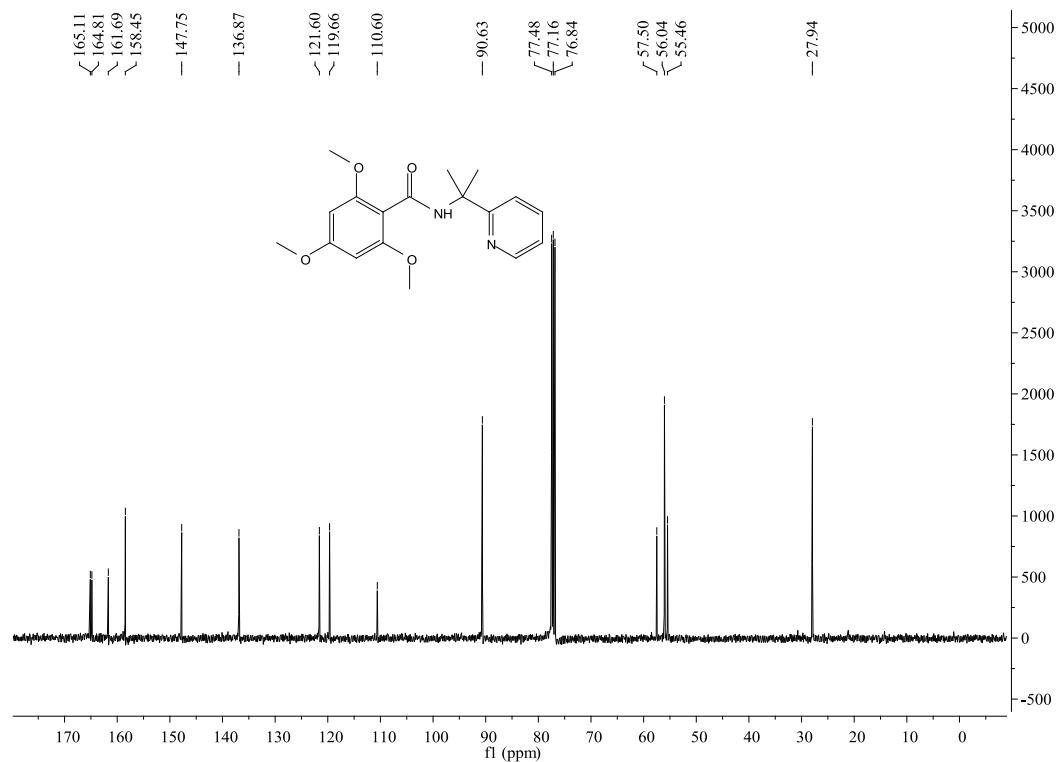



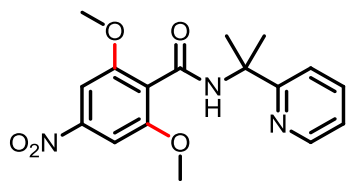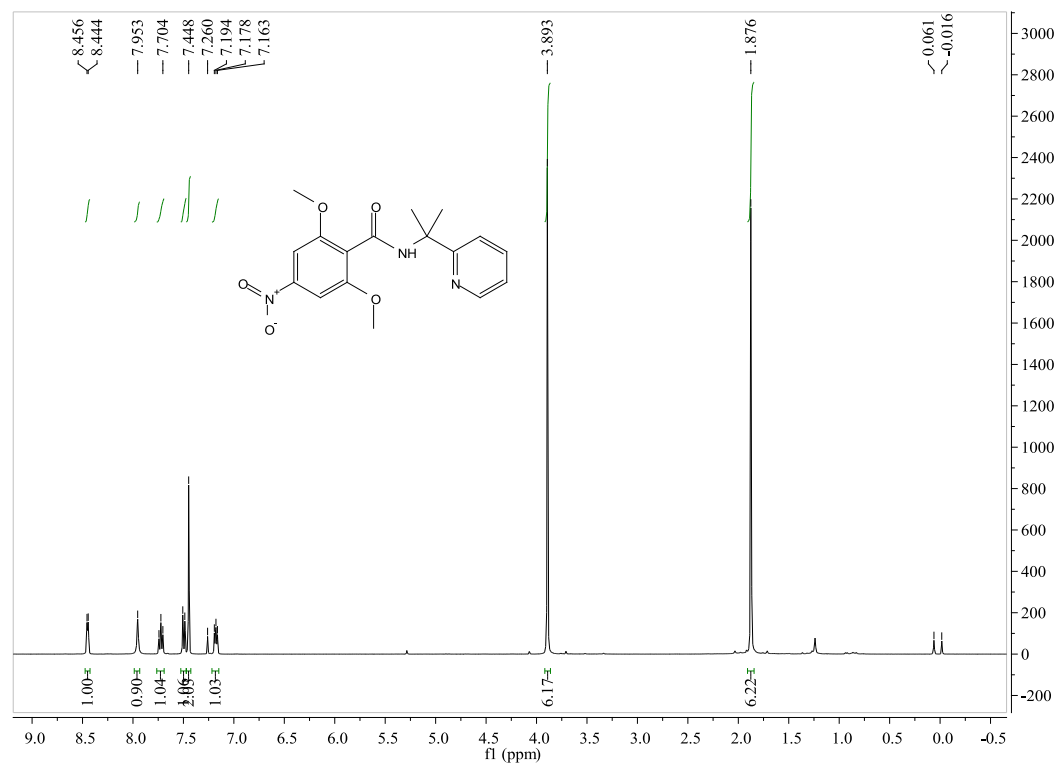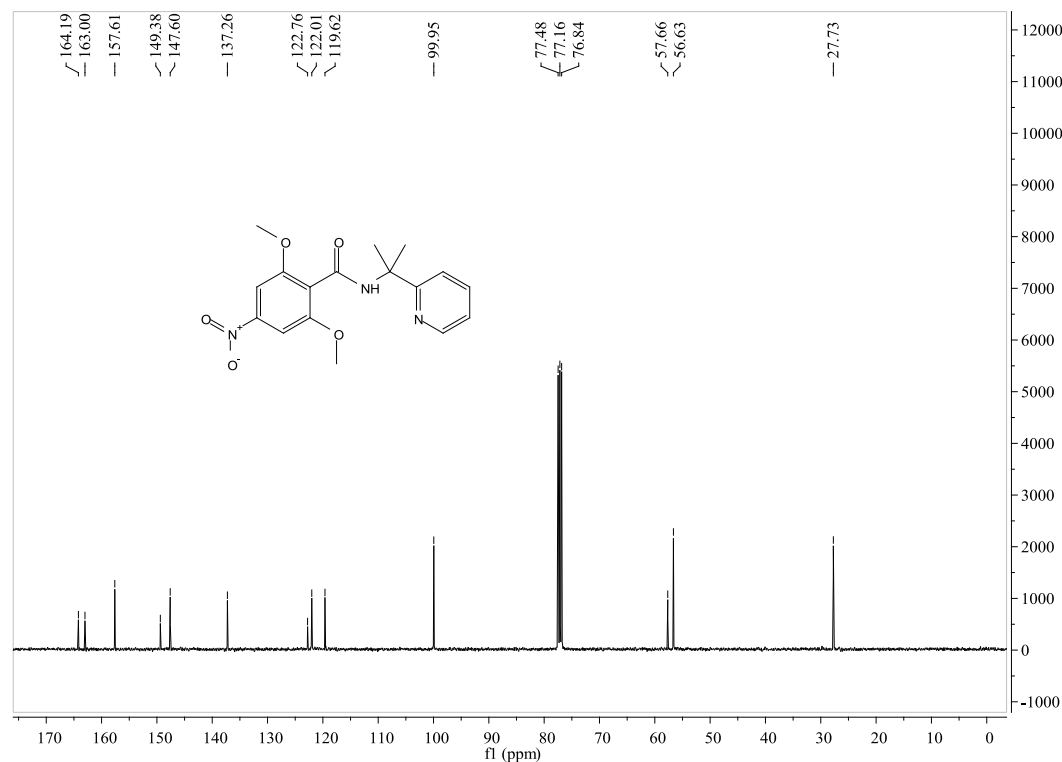

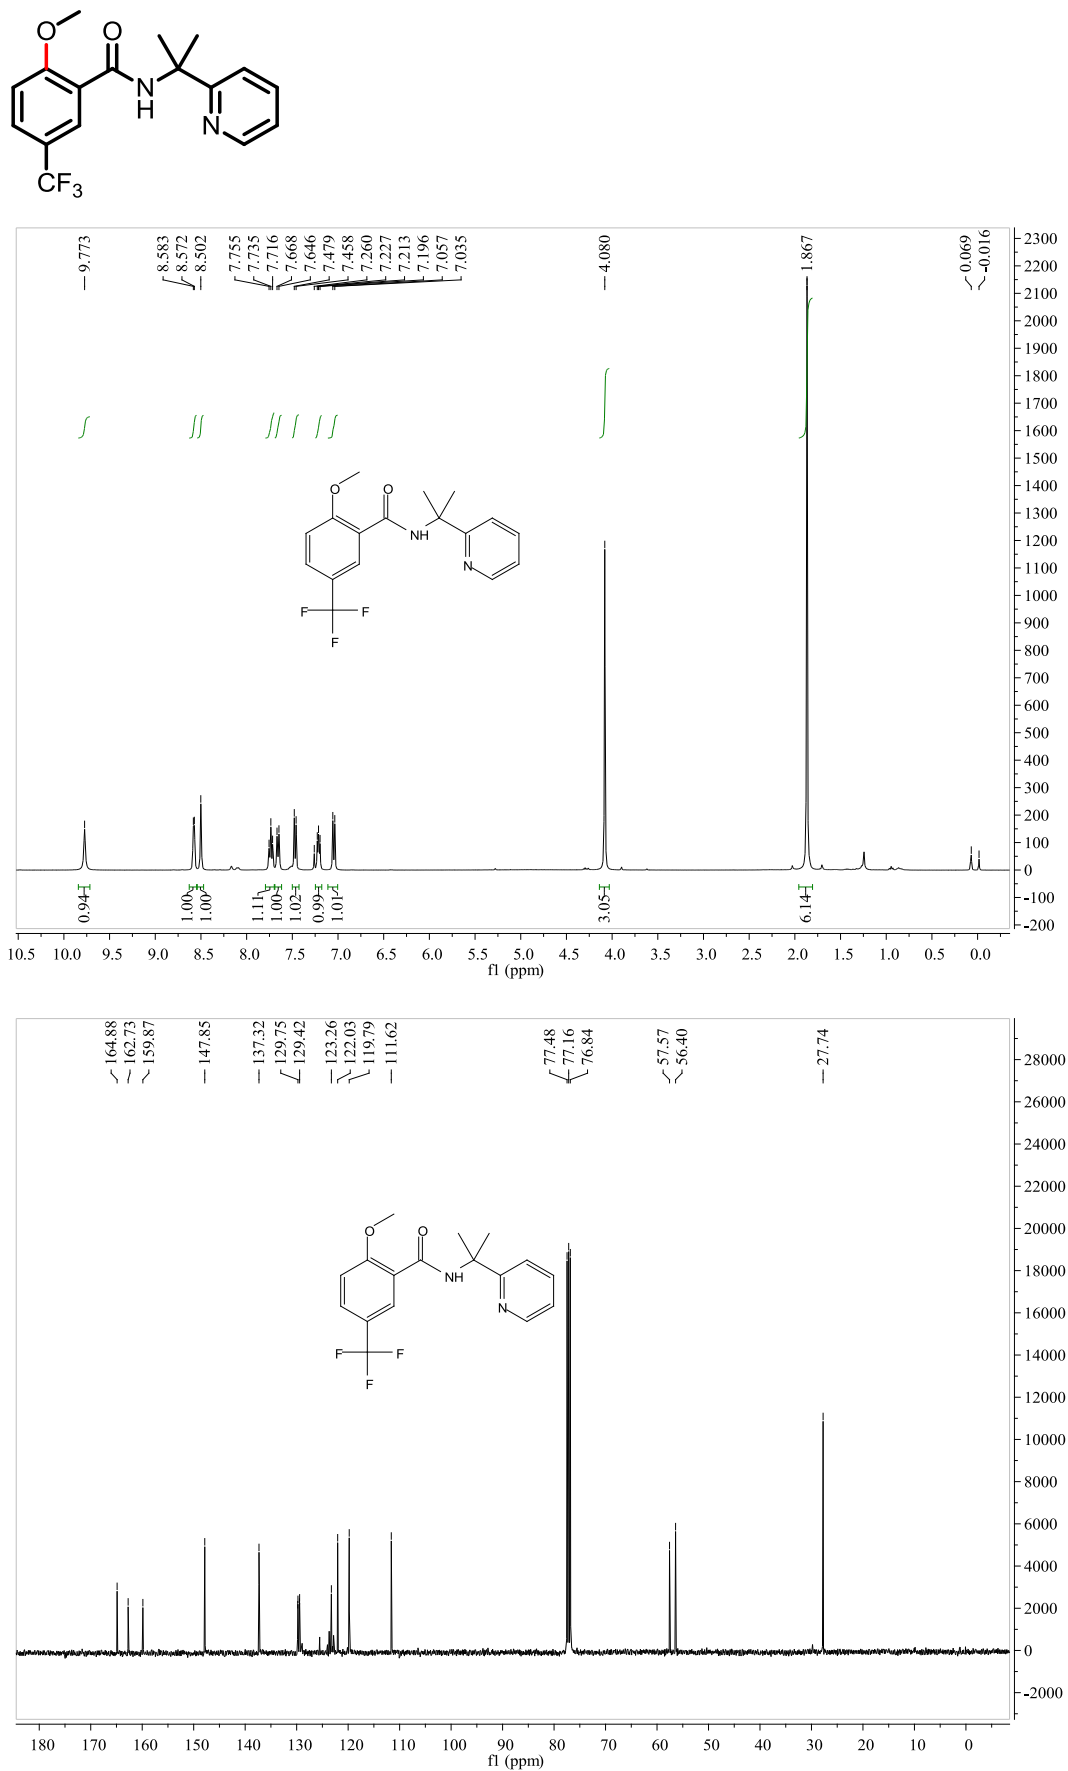

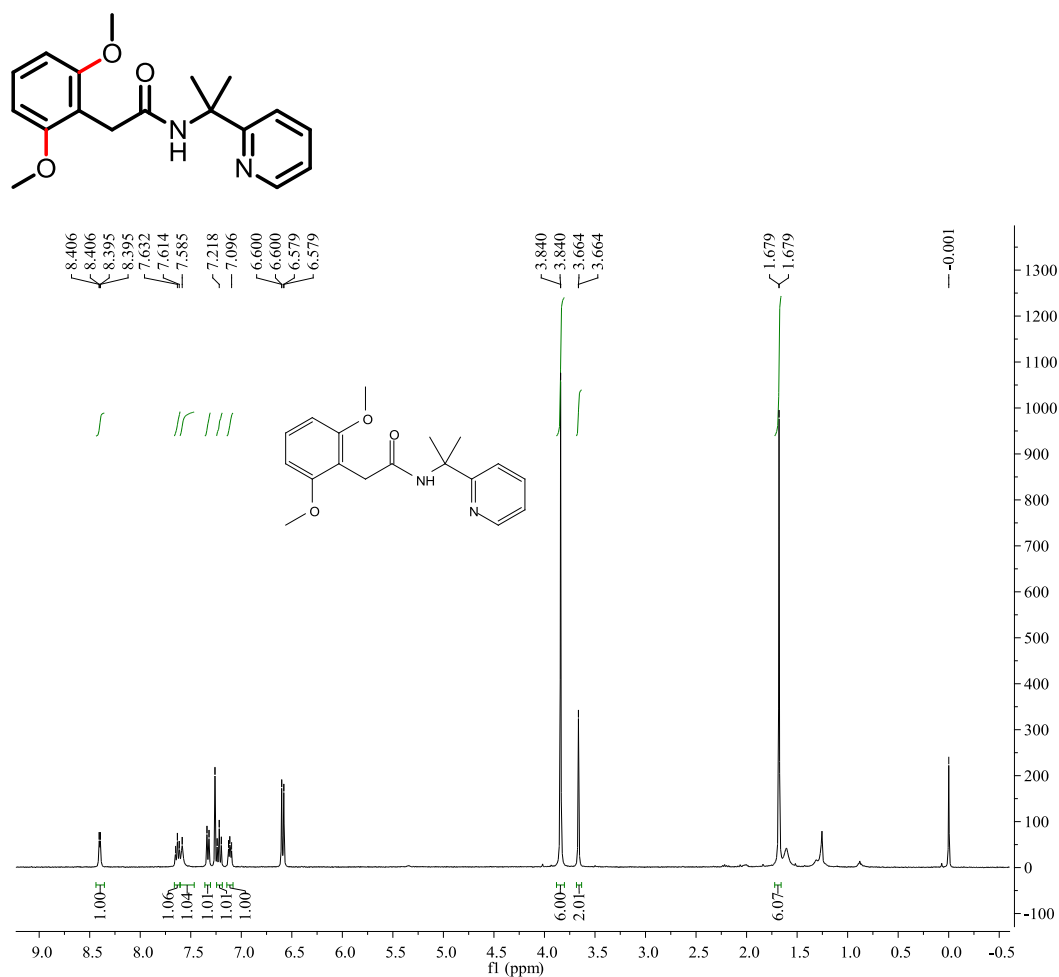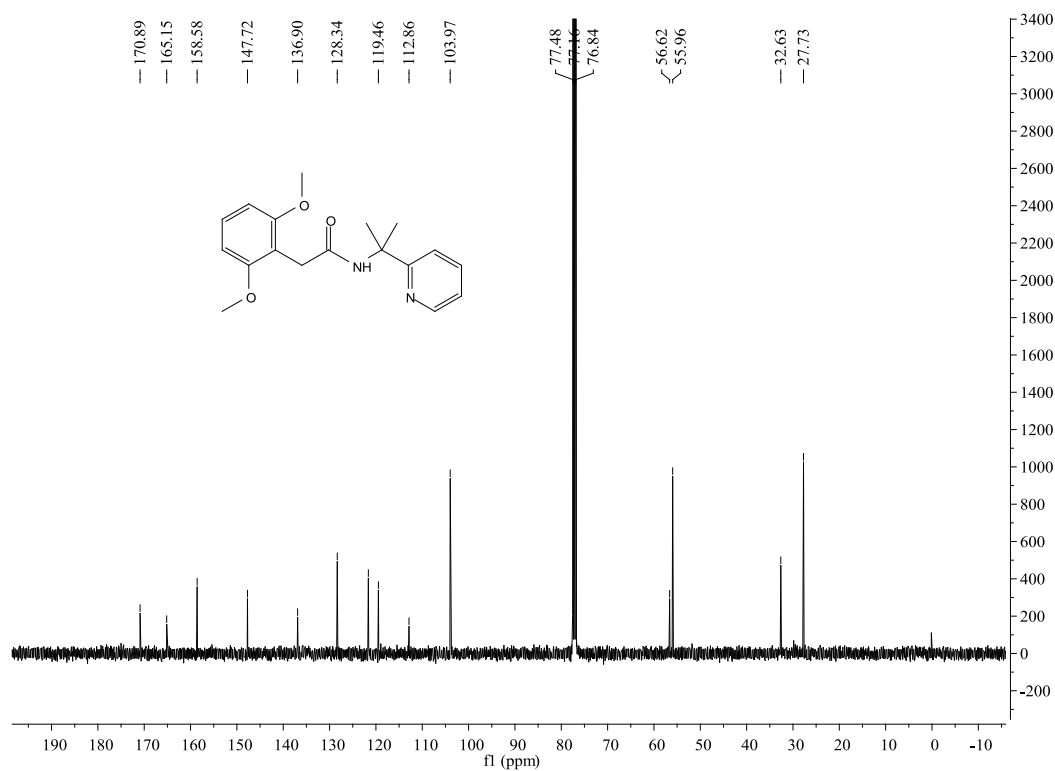

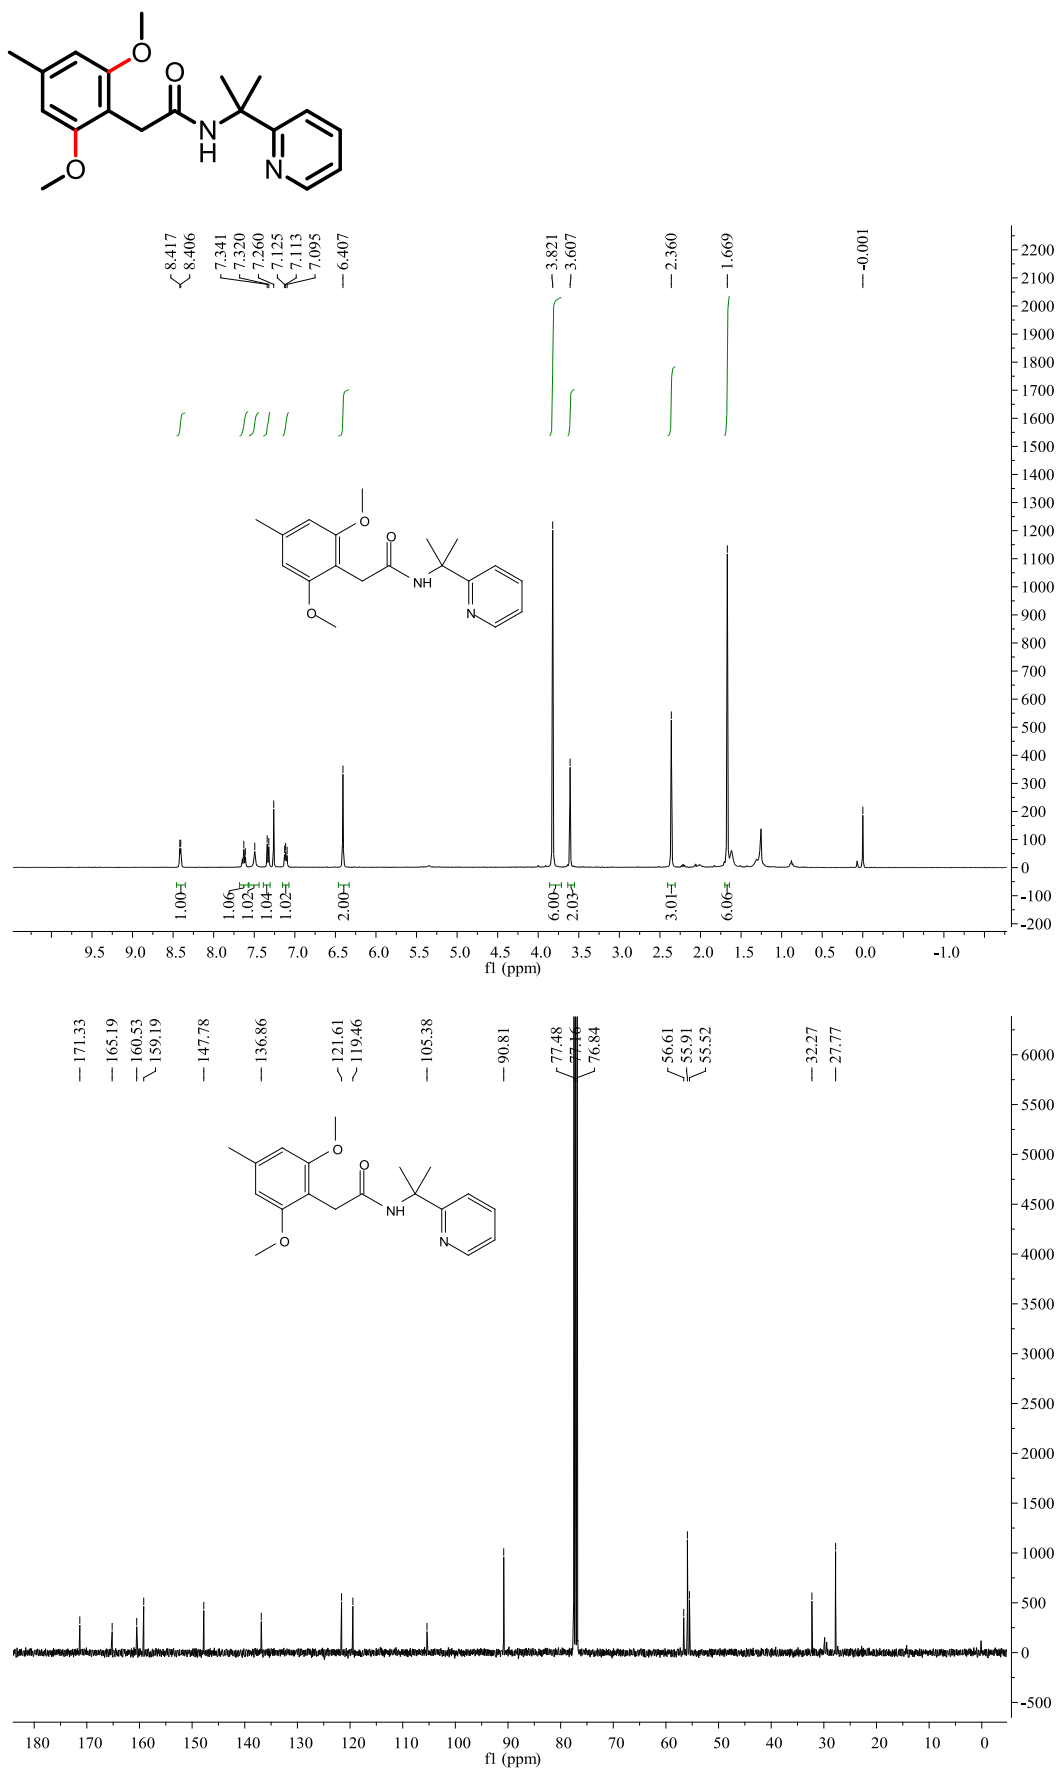

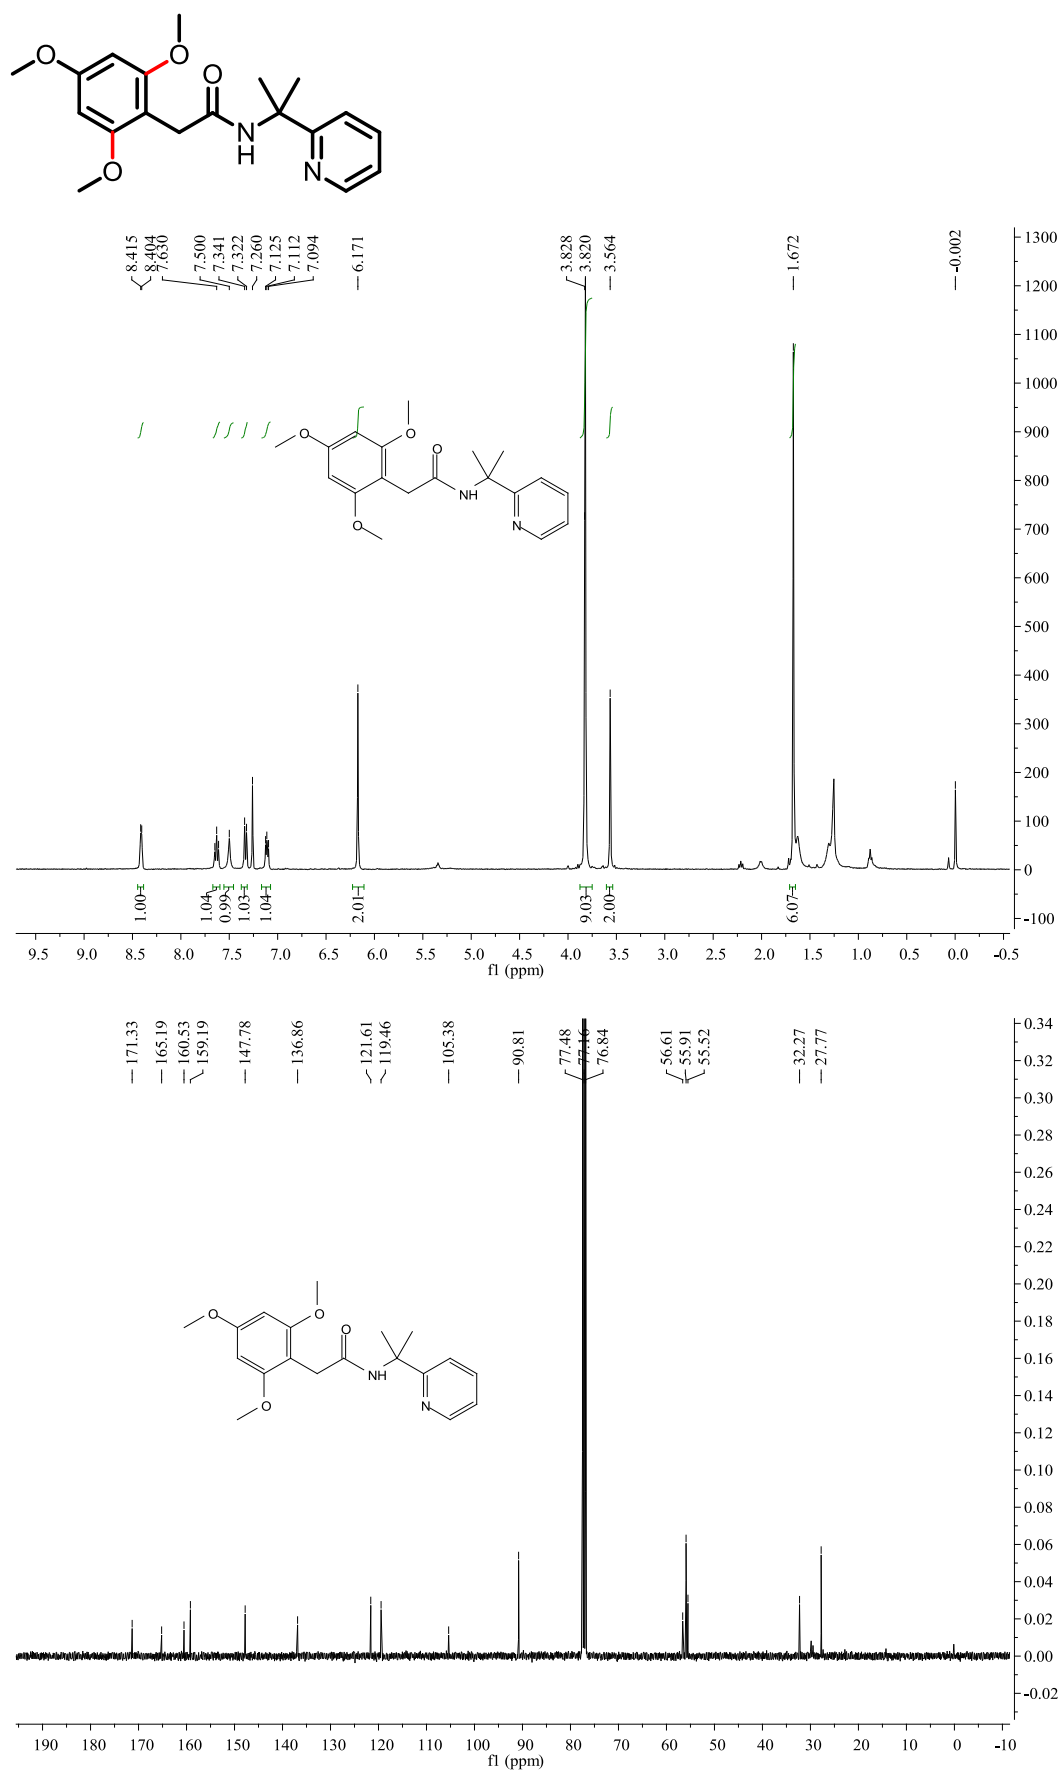

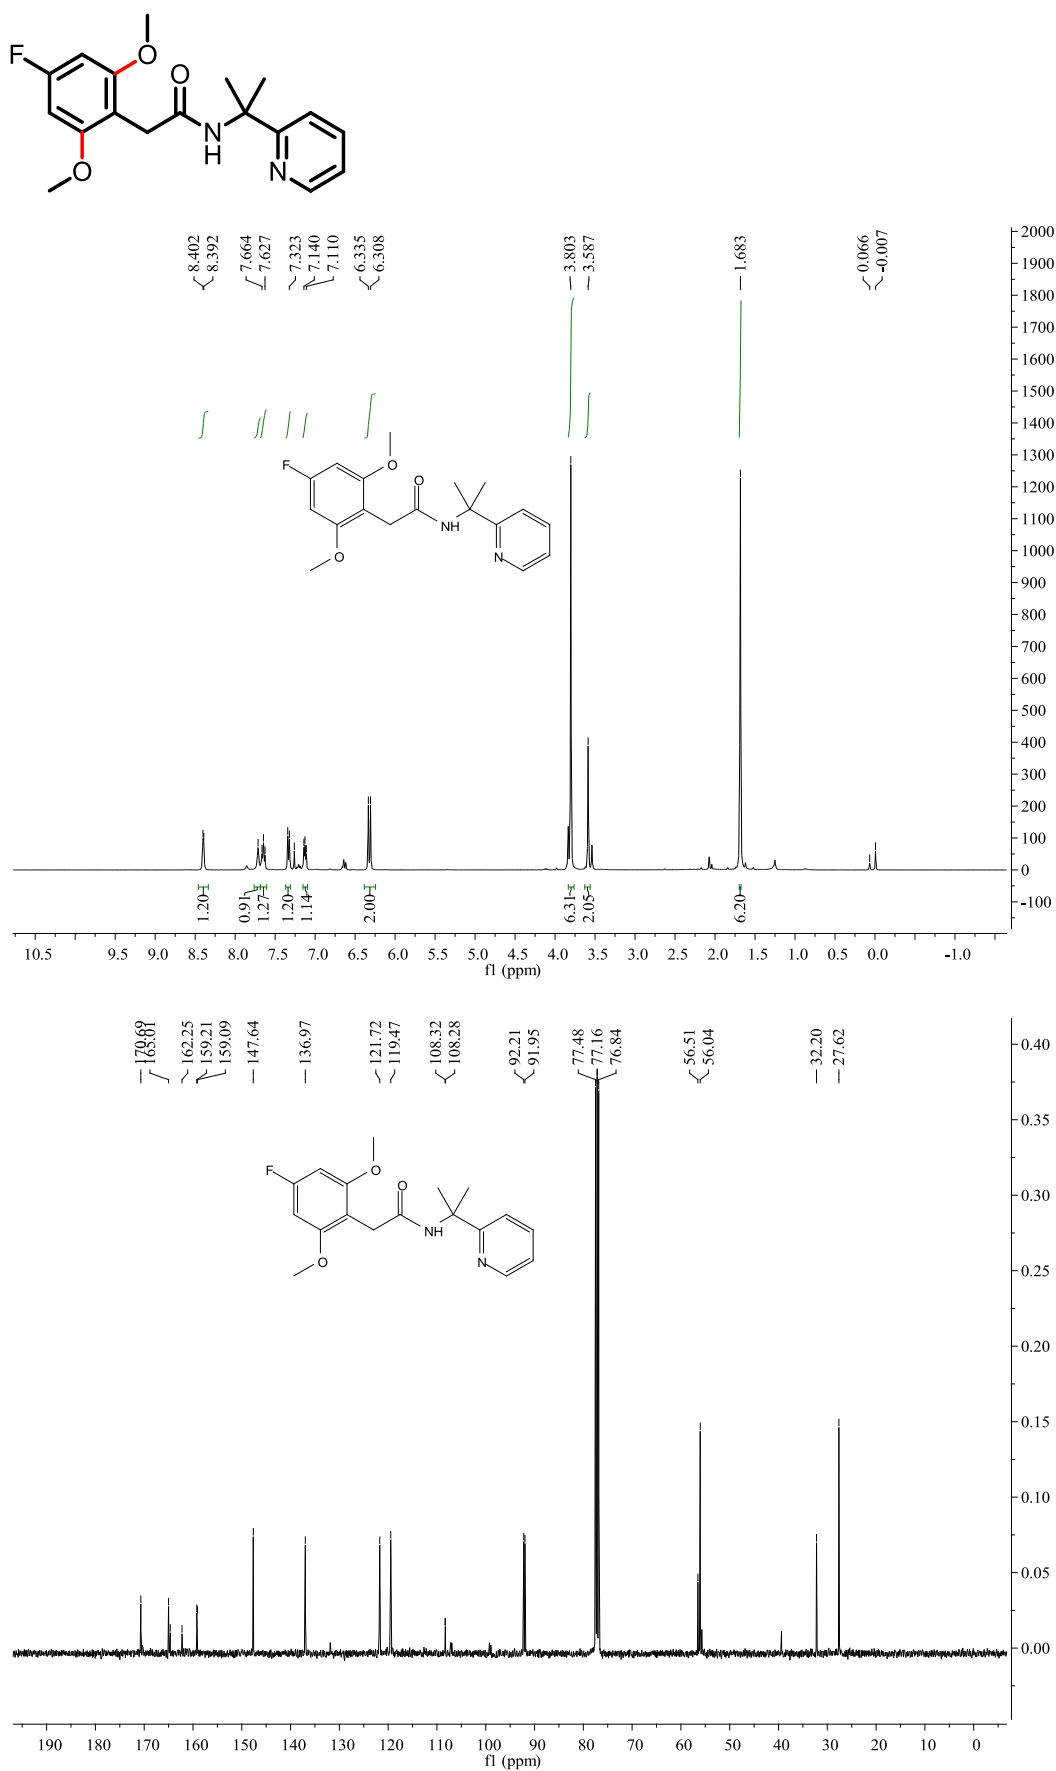

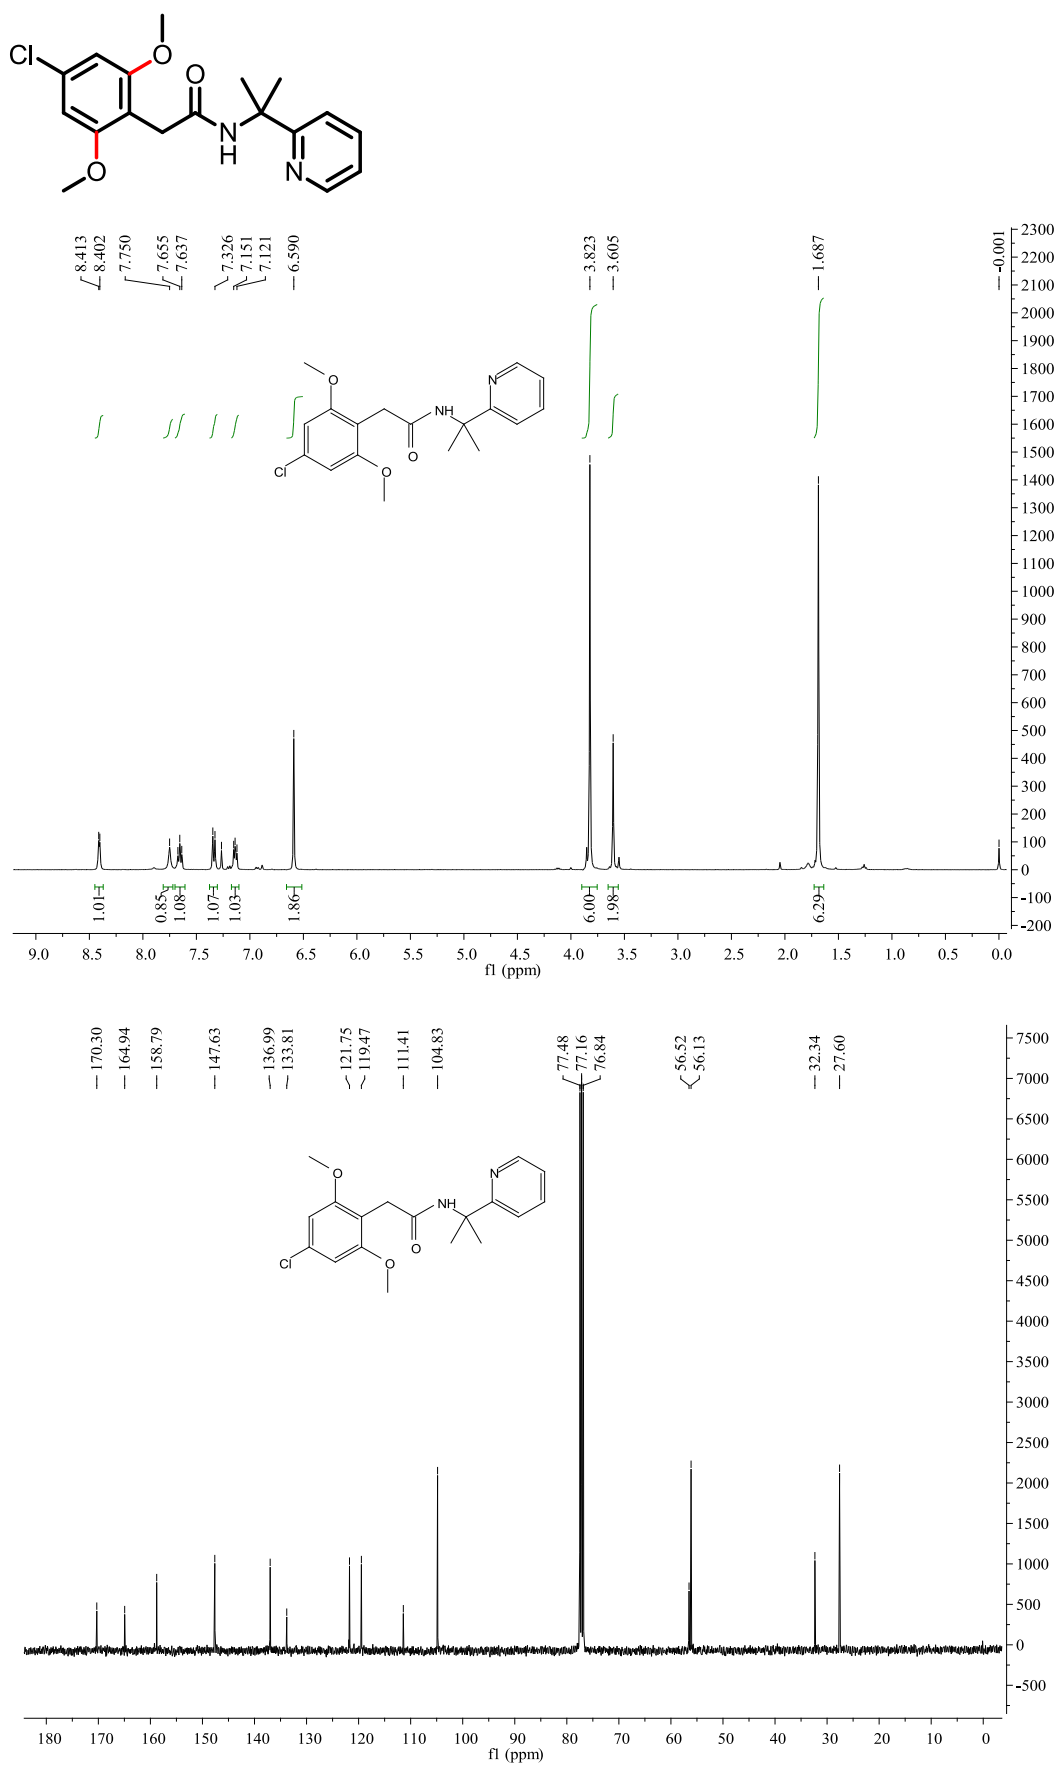

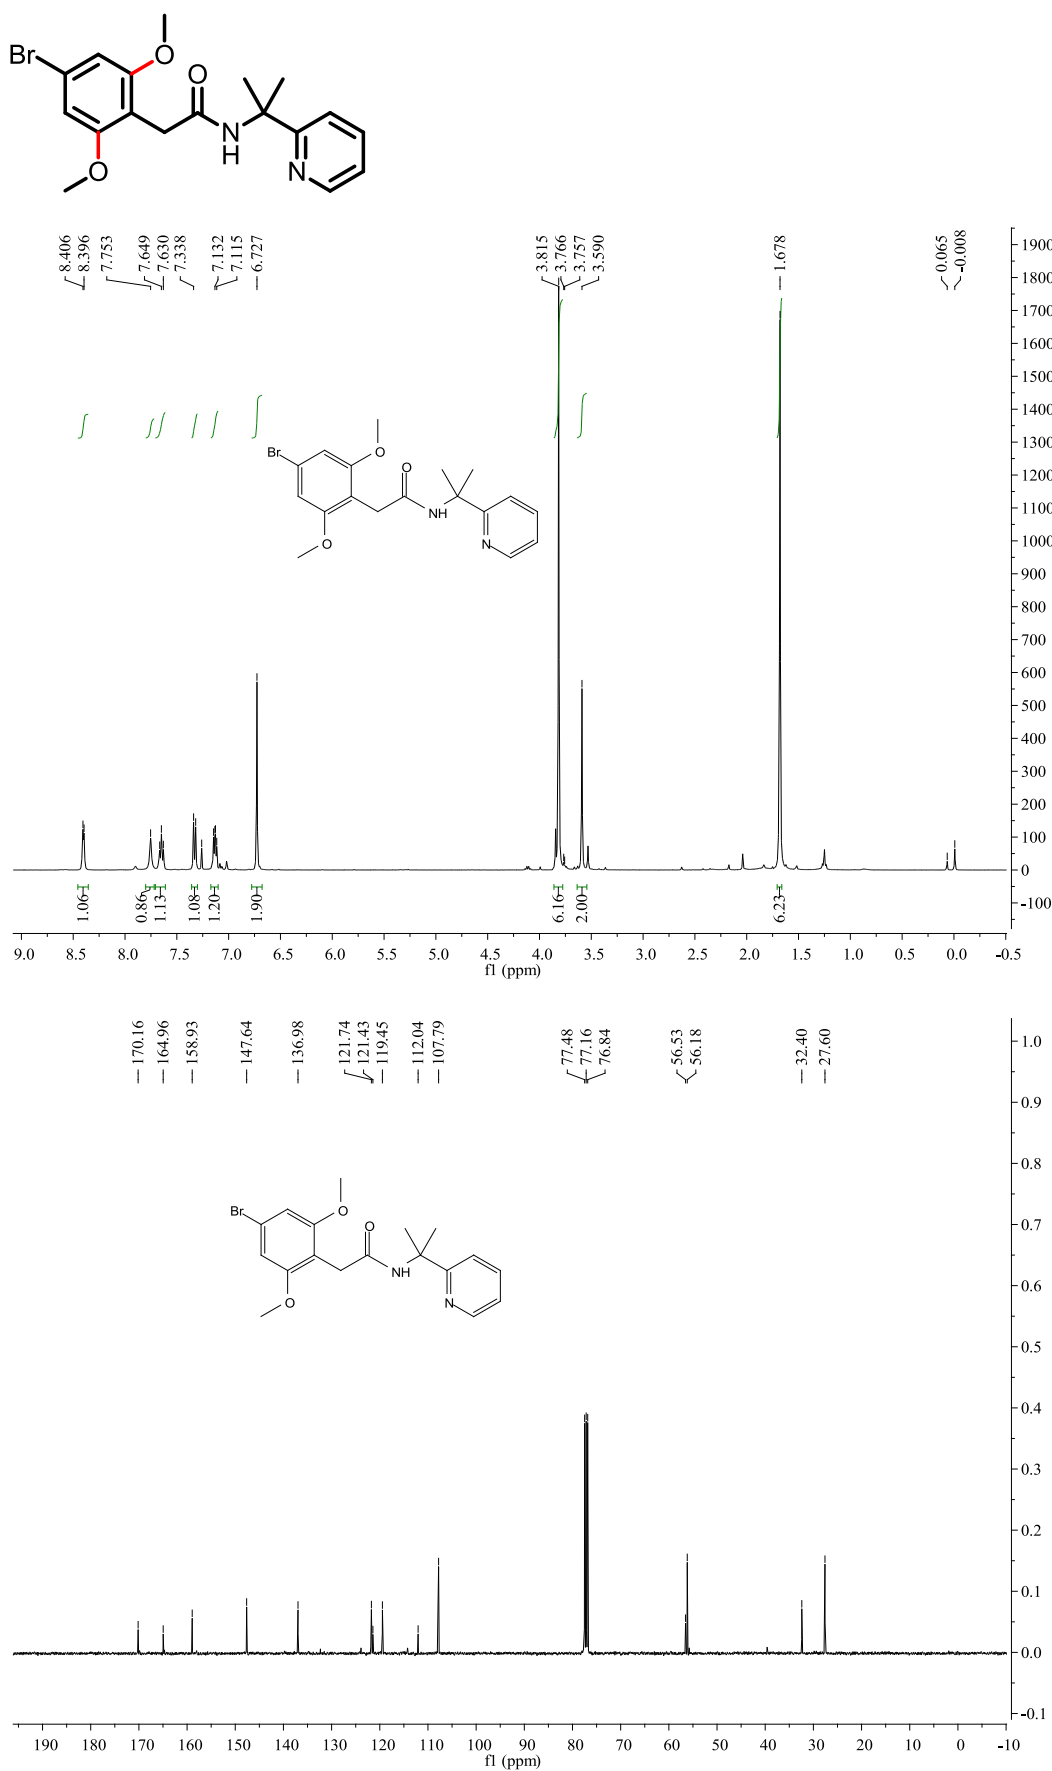



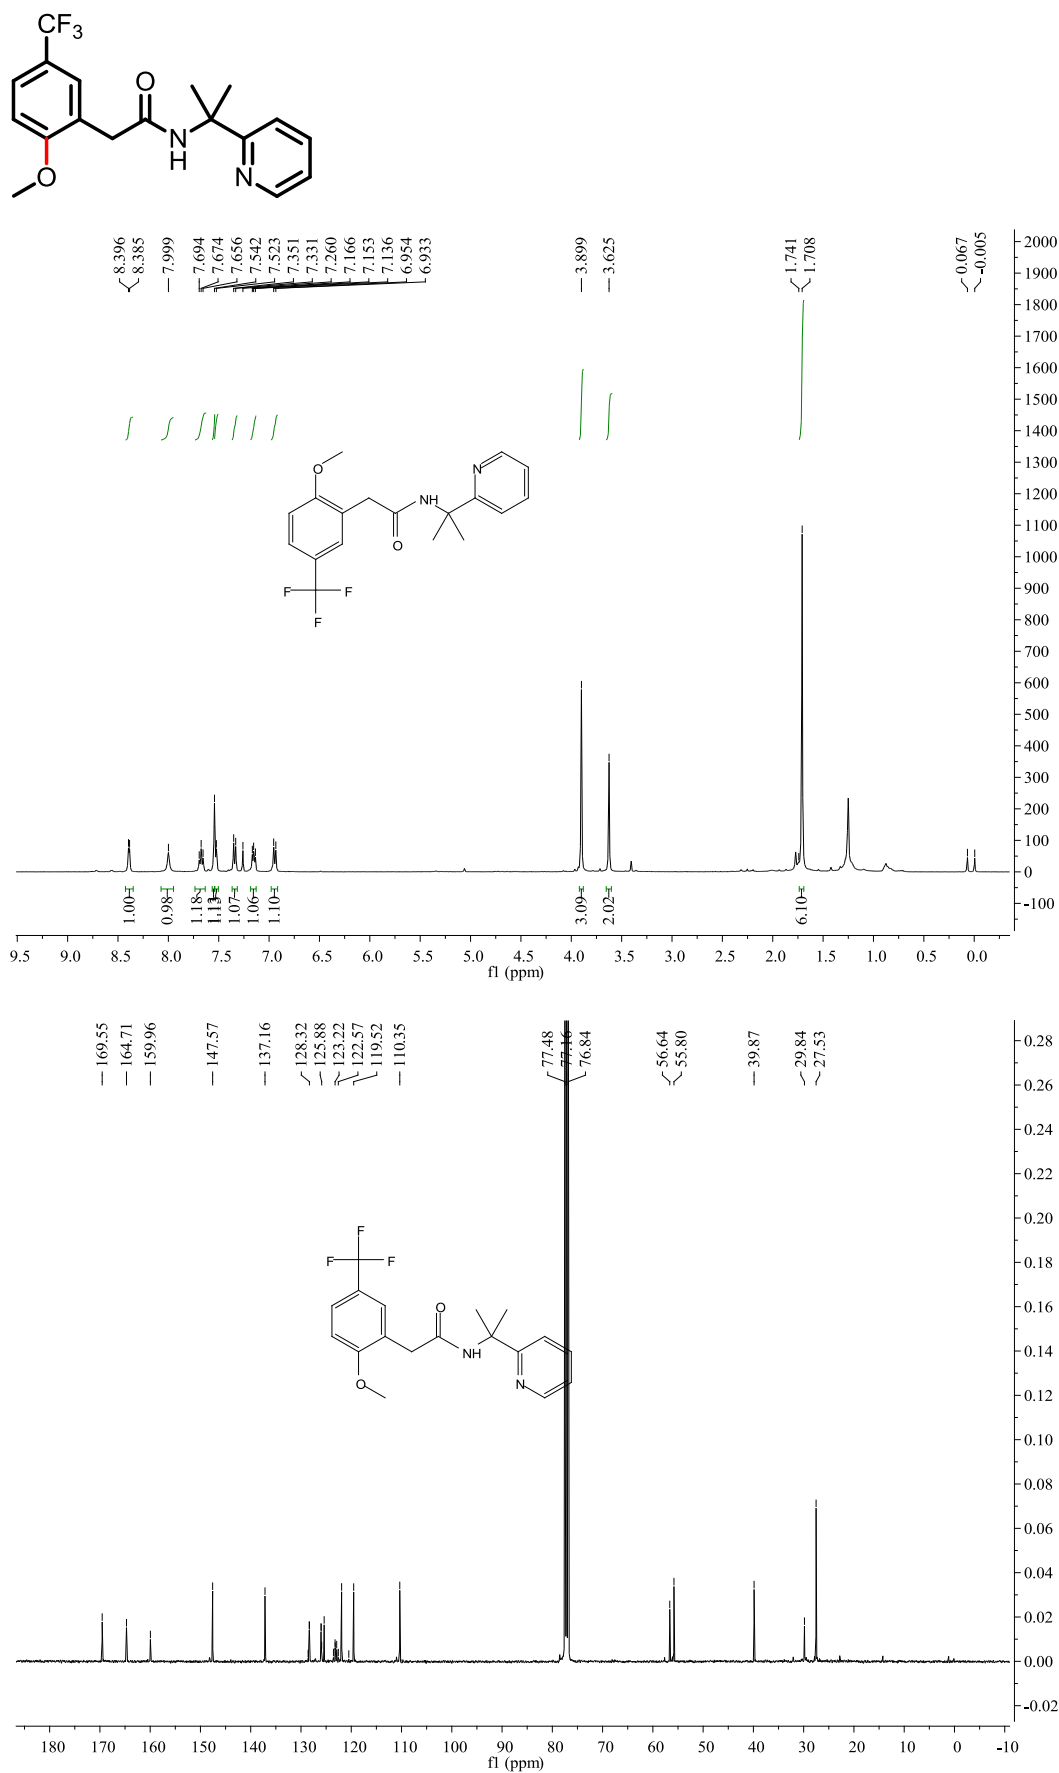

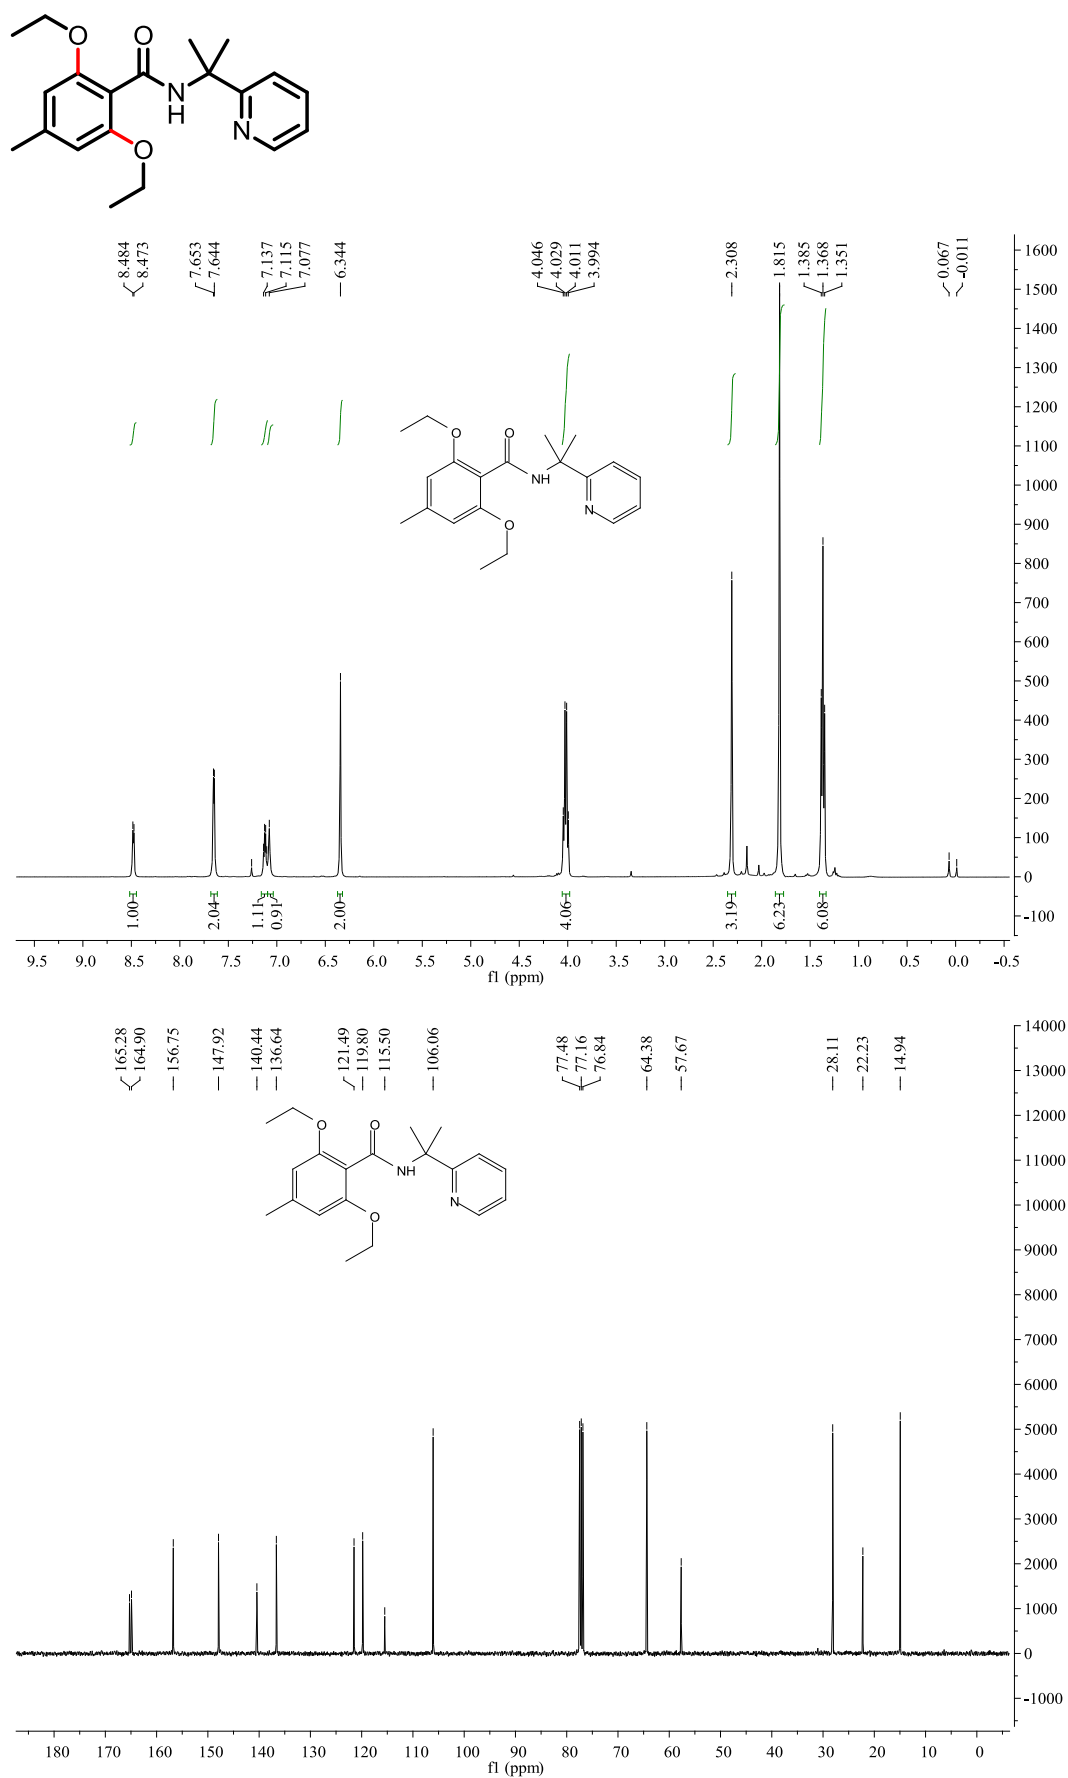

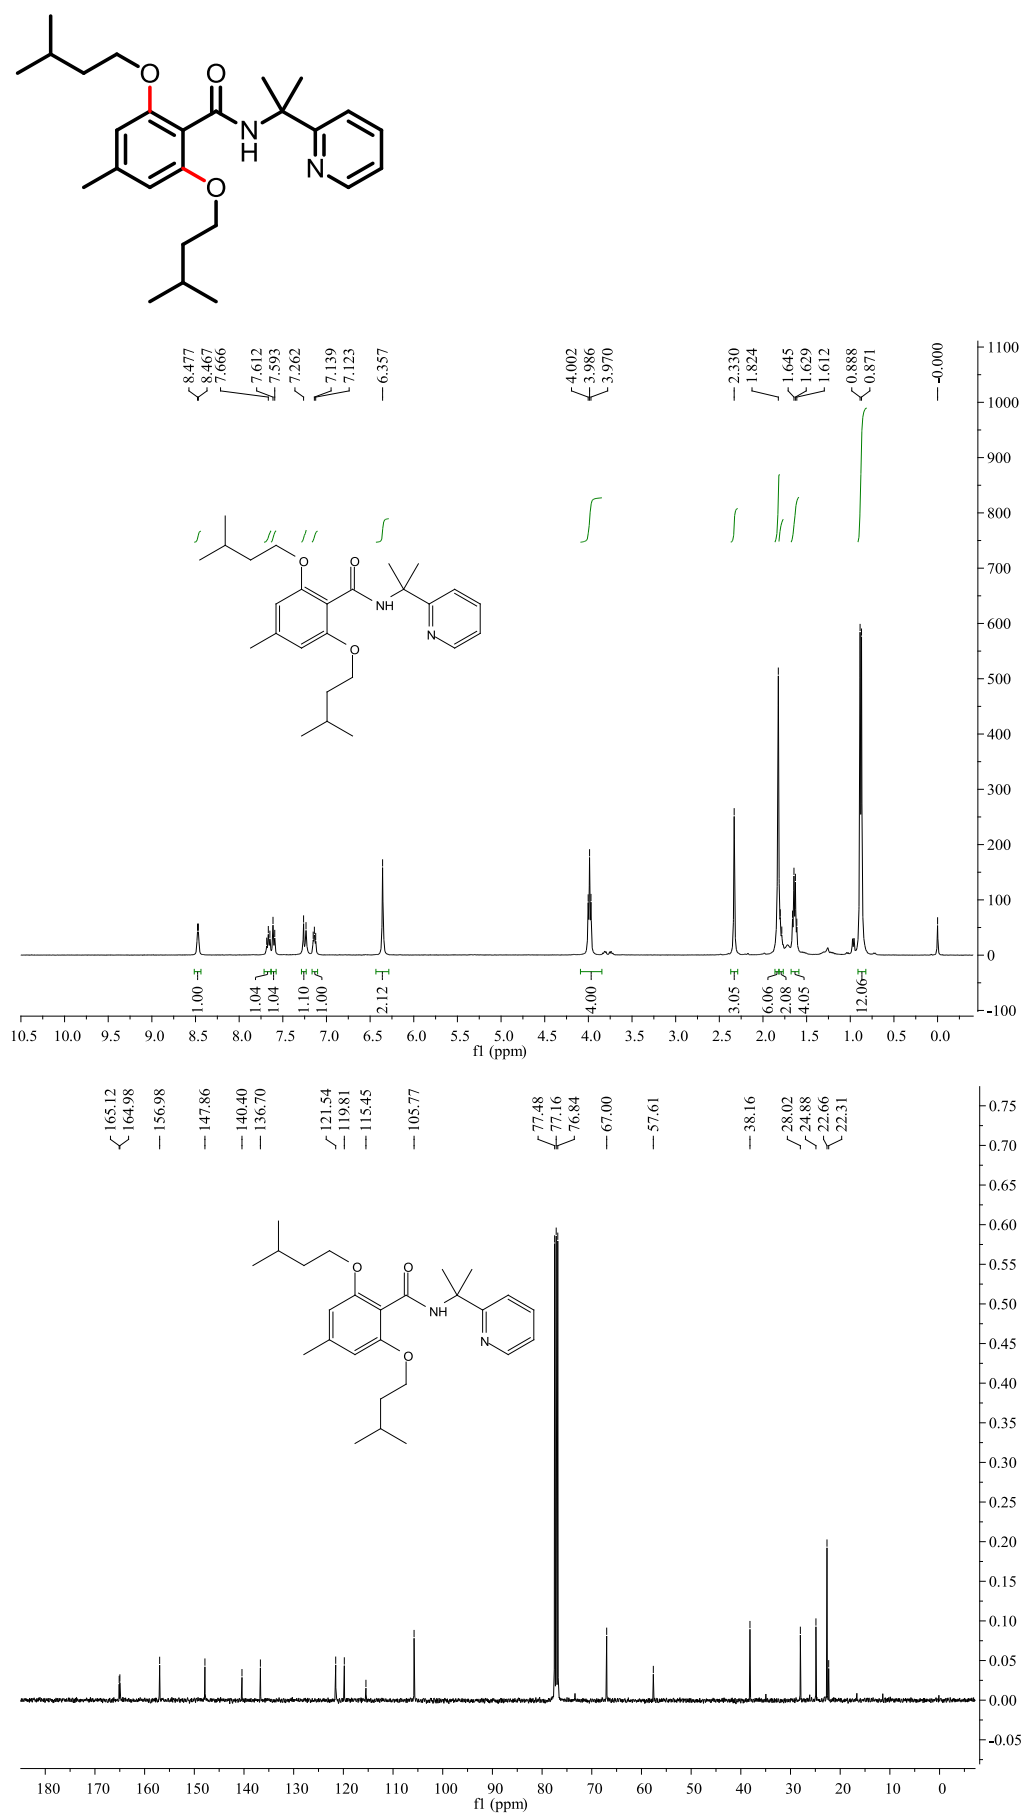

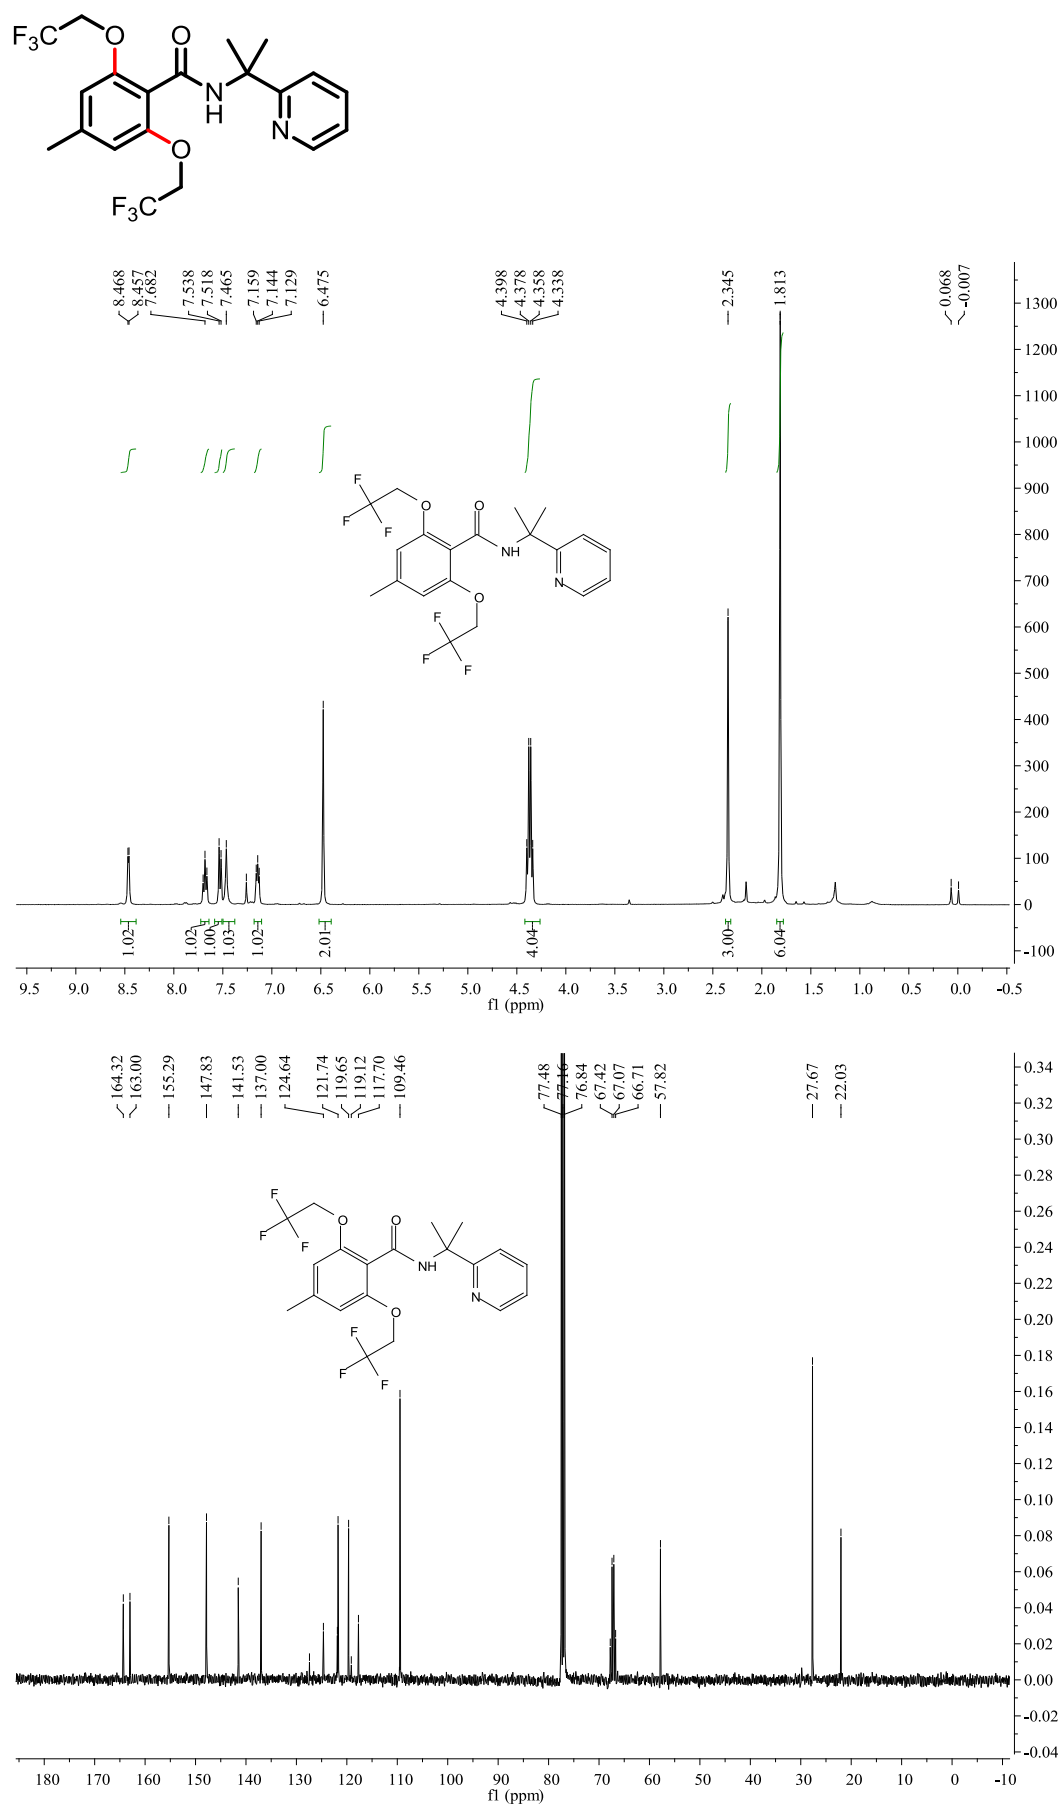

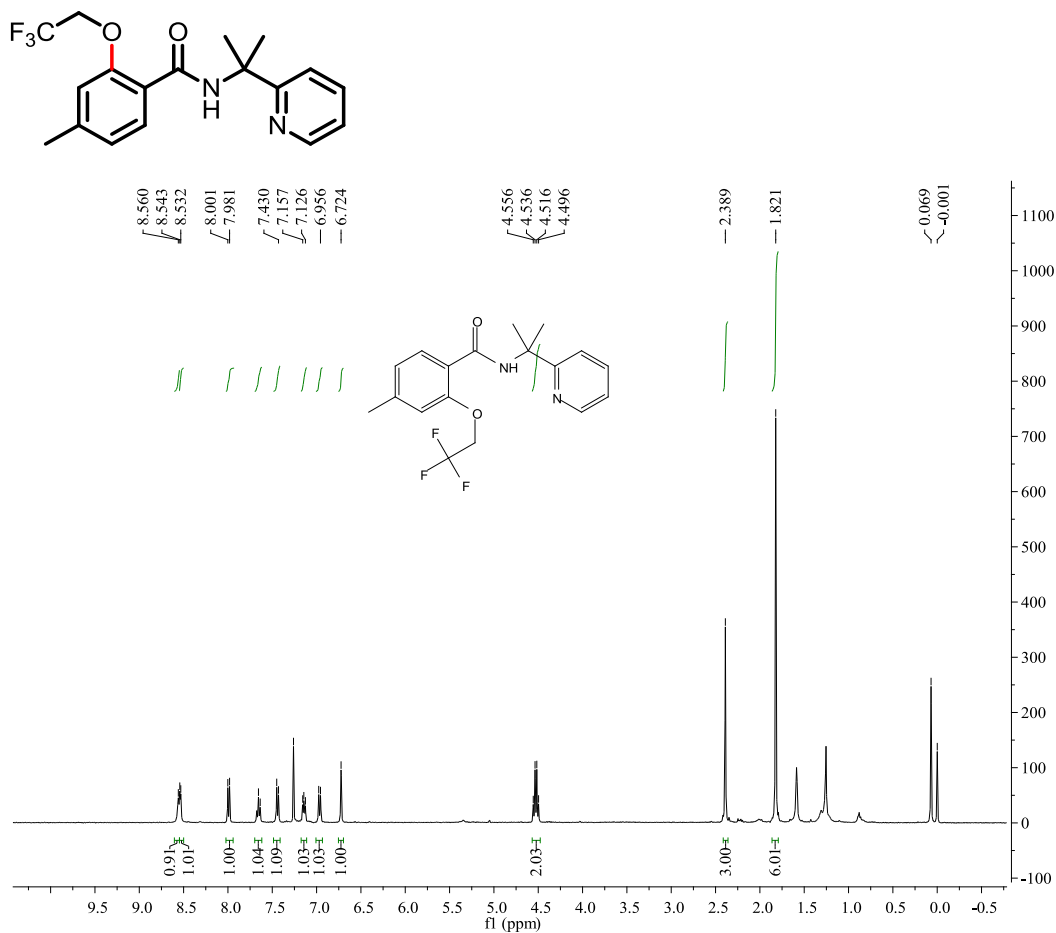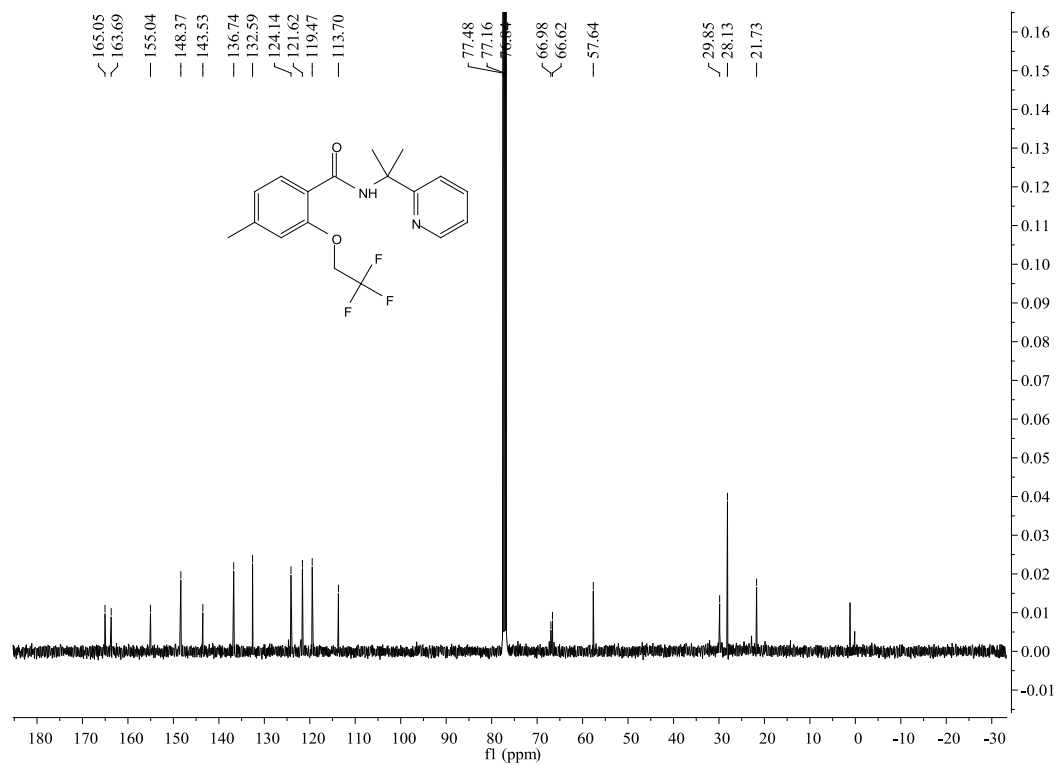

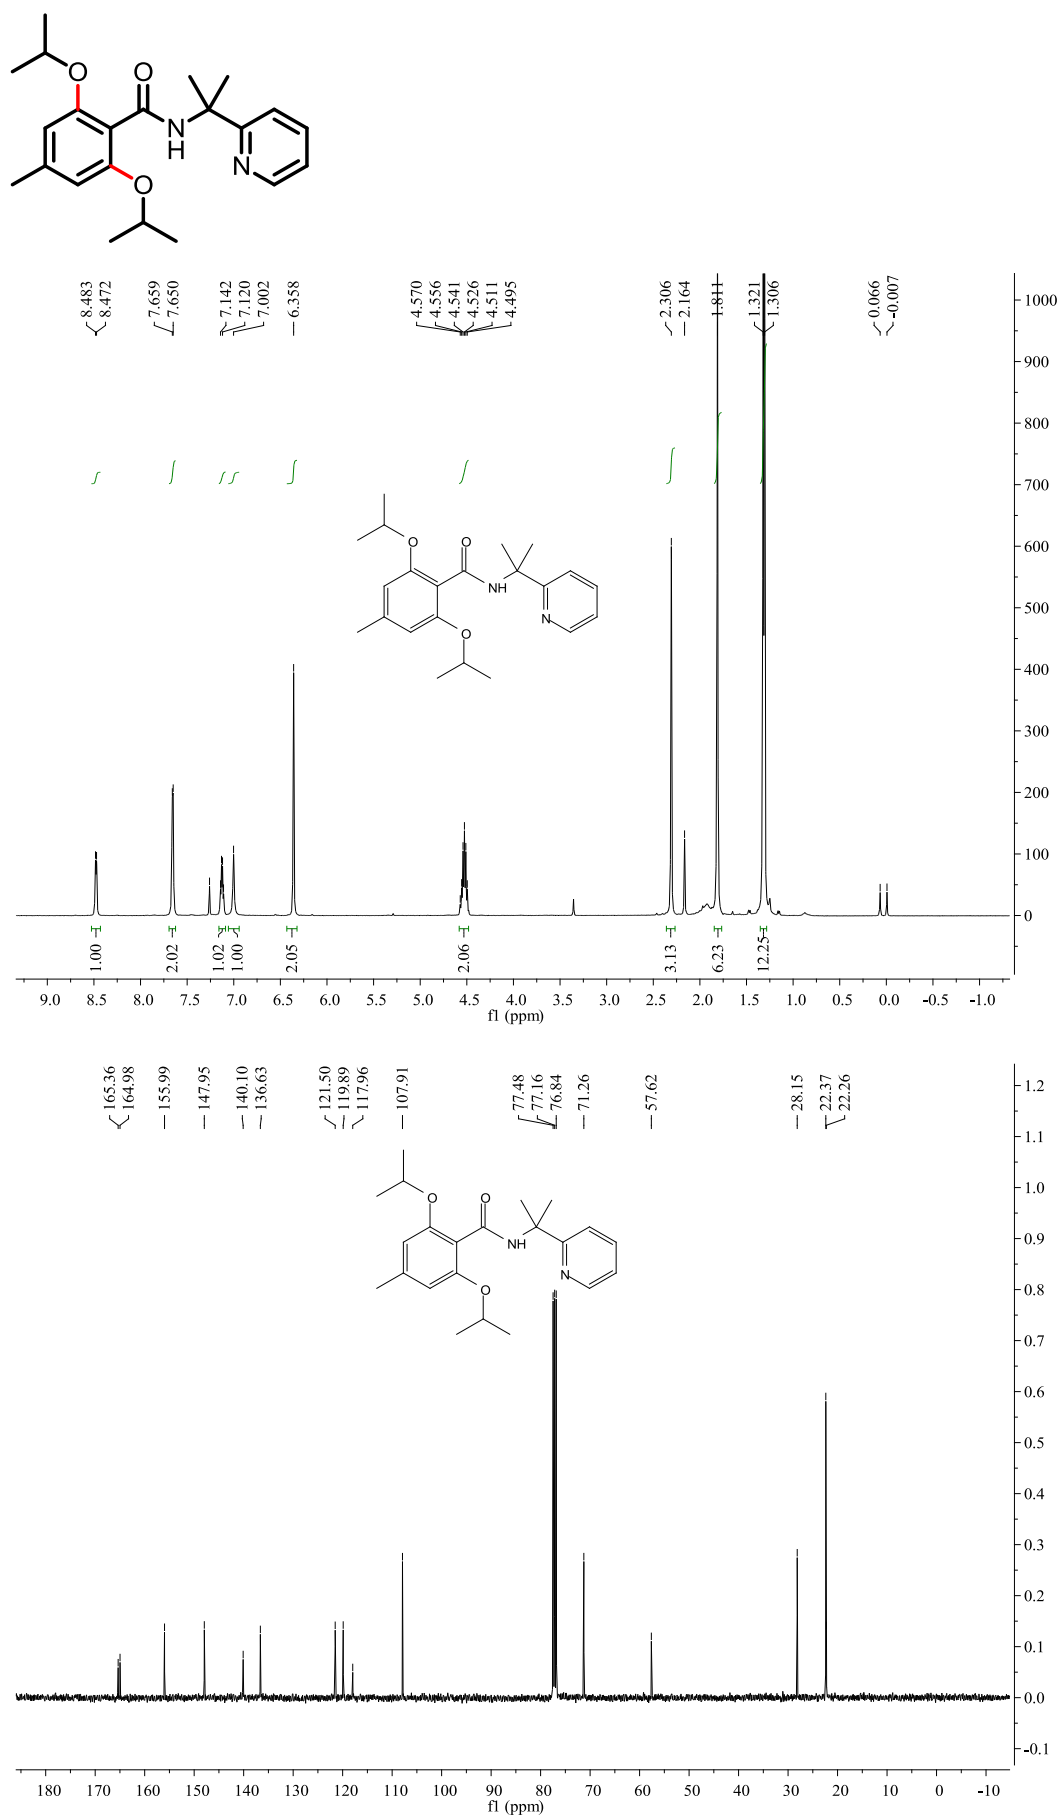

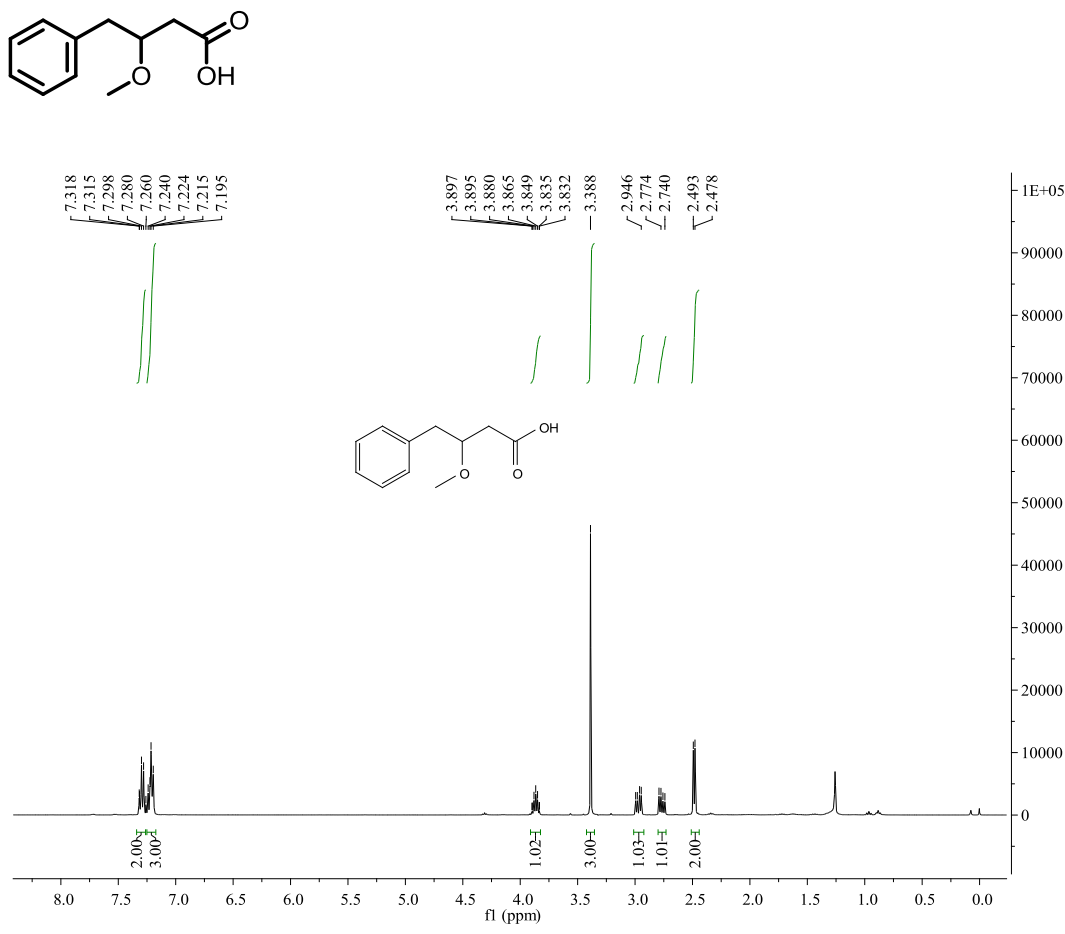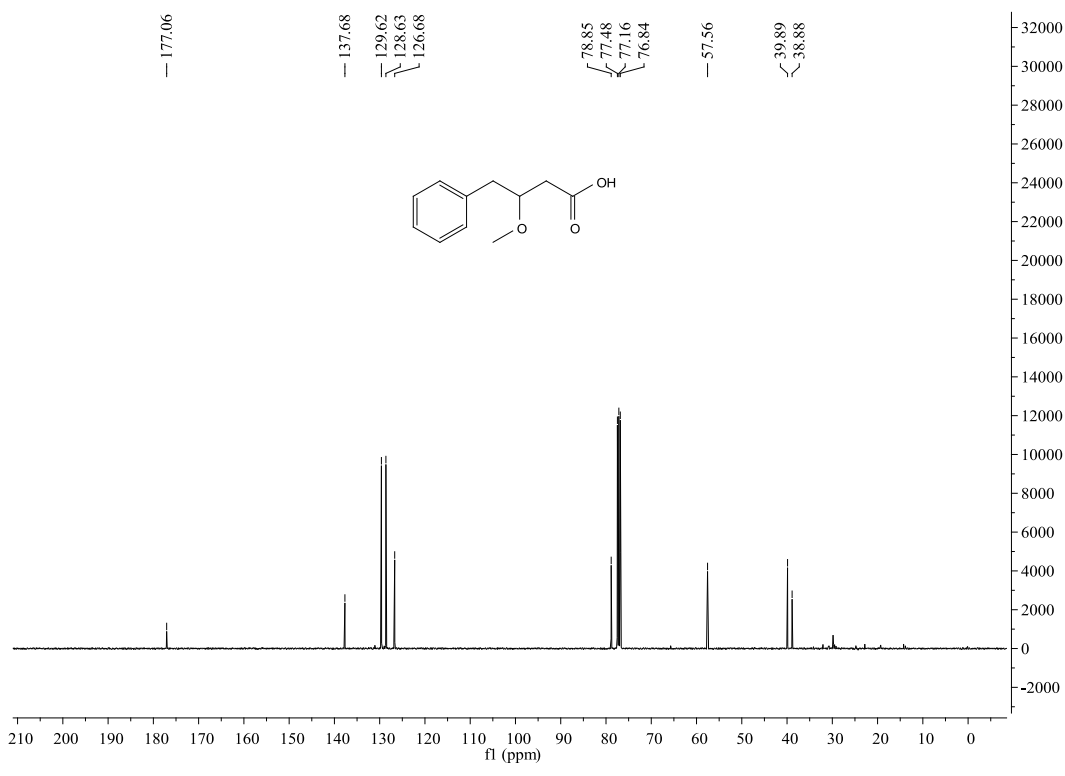

Supplement: c3sc51993g.pdf [file c3sc51993g.pdf]
